# Supplementary material for: Synergistic effect and coordination environment tuned water-gas shift reaction on MoS2 catalyst
Source: Royal Society of Chemistry journal article supplement (doi:10.1039/d3cy01659e), 2024-01-01
Supplement: d3cy01659e1.pdf [file d3cy01659e1.pdf]

**Electronic Supplementary Information for:**

**Synergistic effect and coordination environment tuned water-gas shift reaction on MoS<sub>2</sub> catalyst**

Hai-Yan Su,<sup>a</sup> Wenbo Liao,<sup>a,\*</sup> Keju Sun<sup>b,\*</sup>

*<sup>a</sup>Guangdong Provincial Key Laboratory of Distributed Energy Systems, School of Chemical Engineering and Energy Technology, Dongguan University of Technology, 1 Daxue Road, Dongguan 523808, China.*

*<sup>b</sup>Hebei Key Laboratory of Applied Chemistry, School of Environmental and Chemical Engineering, Yanshan University, 438 Hebei Avenue, Qinhuangdao 066004, China.*

*\*E-mail: liaowenbo110@163.com (Wenbo Liao); kjsun@ysu.edu.cn (Keju Sun)*

|                                                                                                  |    |
|--------------------------------------------------------------------------------------------------|----|
| <b>S1.</b> Calculation models for MoS <sub>2</sub> edges .....                                   | 1  |
| <b>S2.</b> Effect of force convergence on adsorption energies of species .....                   | 2  |
| <b>S3.</b> Imaginary frequency analysis of the transition states .....                           | 3  |
| <b>S4.</b> Zero-point energy of adsorbed species and transition states .....                     | 5  |
| <b>S5.</b> Structures for intermediates adsorption on various surfaces .....                     | 8  |
| <b>S6.</b> Structures at transition states of elementary reactions on various surfaces .....     | 9  |
| <b>S7.</b> Coverage of species via microkinetic modeling .....                                   | 13 |
| <b>S8.</b> Ratio of coverage of intermediates and vacant sites as a function of temperature .... | 14 |
| <b>S9.</b> Converged Cartesian coordinates for species adsorption and transition state .....     | 15 |

## S1. Calculation models for MoS<sub>2</sub> edges

**Figure S1.** The calculation models for (a, b) Mo edge and (c, d) S edge. Green and yellow spheres represent Mo and S atoms, respectively.

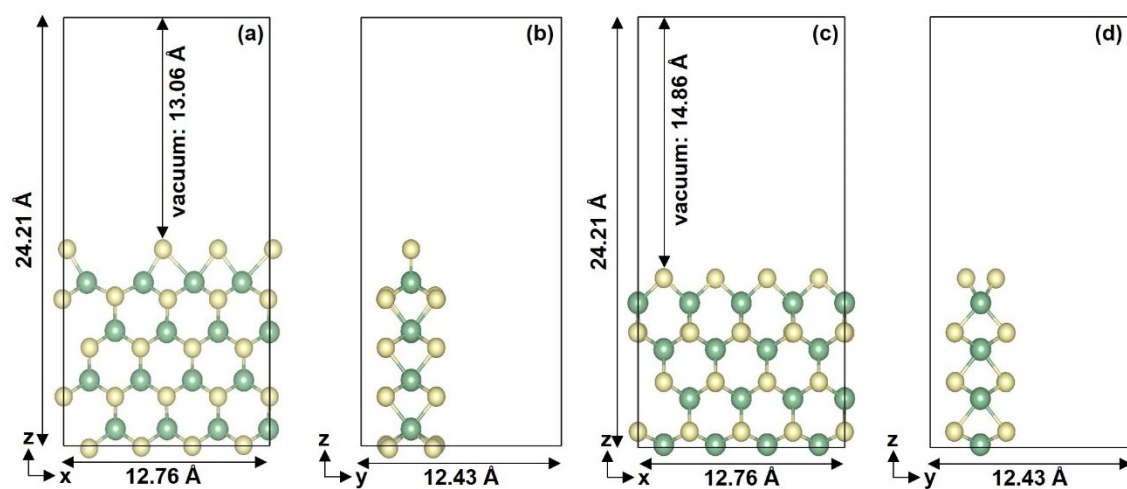

## S2. Effect of force convergence on adsorption energies of species

**Table S1.** Effect of force convergence ( $F$ , in eV/Å) on adsorption energies ( $\Delta E_{\text{Ads}}$ , in eV) of selected species at favorable adsorption sites on  $\text{MoS}_{2-v}(001)$ ,  $\text{Cu/MoS}_{2-v}(001)$ , Mo and S edges, with 13%, 13%, 62.5% and 50% S vacancy, respectively. ZPE corrections are not included.

| Species              | $\text{MoS}_{2-v}(001)$ |          | $\text{Cu/MoS}_{2-v}(001)$ |          | Mo edge  |          | S edge   |          |
|----------------------|-------------------------|----------|----------------------------|----------|----------|----------|----------|----------|
|                      | $F=0.03$                | $F=0.02$ | $F=0.03$                   | $F=0.02$ | $F=0.03$ | $F=0.02$ | $F=0.03$ | $F=0.02$ |
| $\text{H}_2\text{O}$ | -0.11                   | -0.11    | -0.42                      | -0.42    | -0.84    | -0.73    | -0.22    | -0.22    |
| $\text{CO}$          | -0.89                   | -0.89    | -0.80                      | -0.80    | -1.24    | -1.11    | -0.67    | -0.67    |
| $\text{OH}$          | -4.25                   | -4.25    | -4.03                      | -4.03    | -4.27    | -4.15    | -3.41    | -3.41    |
| $\text{H}$           | -0.33                   | -0.33    | -0.35                      | -0.35    | -0.31    | -0.19    | -0.19    | -0.19    |
| $\text{O}$           | -7.29                   | -7.29    | -5.70                      | -5.70    | -5.56    | -5.44    | -5.41    | -5.41    |
| $\text{HCOO}$        | -2.80                   | -2.80    | -2.79                      | -2.79    | -3.15    | -3.03    | -2.74    | -2.74    |
| $\text{COOH}$        | -1.93                   | -1.93    | -1.72                      | -1.73    | -2.54    | -2.42    | -2.02    | -2.02    |

### S3. Imaginary frequency analysis of the transition states

**Table S2.** Imaginary frequency (in  $\text{cm}^{-1}$ ) at the transition states of various elementary reactions on  $\text{MoS}_{2-v}(001)$ ,  $\text{Cu/MoS}_{2-v}(001)$ , Mo and S edge. \* and # denote the S vacancy and S site, respectively. Adsorbed and gaseous  $\text{CH}_4$  are used for  $\text{MoS}_{2-v}(001)$  and  $\text{Cu/MoS}_{2-v}(001)$ , respectively. Adsorbed and gaseous  $\text{CO}_2$  are used for the Mo and S edge, respectively.

| Elementary reactions                                               | $\text{MoS}_{2-v}(001)$ | $\text{Cu/MoS}_{2-v}(001)$ |
|--------------------------------------------------------------------|-------------------------|----------------------------|
| $\text{H}_2\text{O}^* + * = \text{OH}^* + \text{H}^*$              | -1043.86                | -861.78                    |
| $\text{OH}^* + * = \text{O}^* + \text{H}^*$                        | -1377.42                | -1310.65                   |
| $2\text{OH}^* = \text{H}_2\text{O}^* + \text{O}^*$                 | -933.79                 | -760.65                    |
| $\text{CO}^* + \text{O}^* = \text{CO}_2^* + *$                     | -299.89                 | -105.12                    |
| $\text{CO}^* + \text{OH}^* = \text{COOH}^* + *$                    | -354.11                 | -195.28                    |
| $\text{CO}^* + \text{H}^* = \text{CHO}^* + *$                      | -403.95                 | -118.73                    |
| $\text{CO}^* + \text{H}^* = \text{COH}^* + *$                      | -1372.31                | -551.52                    |
| $\text{CHO}^* + \text{O}^* = \text{HCOO}^* + *$                    | -371.78                 | -239.77                    |
| $\text{COH}^* + \text{O}^* = \text{COOH}^* + *$                    | -44.55                  | -348.71                    |
| $\text{HCOO}^* + * = \text{CO}_2^* + \text{H}^*$                   | -424.98                 | -409.41                    |
| $\text{COOH}^* + * = \text{CO}_2^* + \text{H}^*$                   | -1477.39                | -1344.90                   |
| $2\text{H}^* = \text{H}_2 + 2^*$                                   | -370.81                 | -373.24                    |
| $\text{CHO}^* + * = \text{CH}^* + \text{O}^*$                      | -456.48                 | -502.07                    |
| $\text{CHO}^* + \text{H}^* = \text{CH}_2\text{O}^* + *$            | -814.00                 | -880.31                    |
| $\text{CHO}^* + \text{H}^* = \text{CHOH}^* + *$                    | -1376.11                | -1328.97                   |
| $\text{COH}^* + \text{H}^* = \text{CHOH}^* + *$                    | -850.03                 | -828.04                    |
| $\text{CH}_2\text{O}^* + * = \text{CH}_2^* + \text{O}^*$           | -513.39                 | -420.62                    |
| $\text{CHOH}^* + * = \text{CH}^* + \text{OH}^*$                    | -308.20                 | -302.52                    |
| $\text{CH}_2\text{O}^* + \text{H}^* = \text{CH}_3\text{O}^* + *$   | -966.42                 | -583.72                    |
| $\text{CH}_2\text{O}^* + \text{H}^* = \text{CH}_2\text{OH}^* + *$  | -1376.13                | -1377.29                   |
| $\text{CHOH}^* + \text{H}^* = \text{CH}_2\text{OH}^* + *$          | -862.06                 | -846.00                    |
| $\text{CH}_3\text{O}^* + * = \text{CH}_3^* + \text{O}^*$           | -324.81                 | -149.43                    |
| $\text{CH}_2\text{OH}^* + * = \text{CH}_2^* + \text{OH}^*$         | -423.19                 | -418.76                    |
| $\text{CH}^* + \text{H}^* = \text{CH}_2^* + *$                     | -940.01                 | -602.79                    |
| $\text{CH}_2^* + \text{H}^* = \text{CH}_3^* + *$                   | -941.57                 | -892.61                    |
| $\text{CH}_3^* + \text{H}^* = \text{CH}_4^* + */\text{CH}_4 + 2^*$ | -874.58                 | -456.44                    |



| Elementary reactions                                                             | Mo edge  | S edge   |
|----------------------------------------------------------------------------------|----------|----------|
| $\text{H}_2\text{O}^* + \# = \text{OH}^* + \text{H}^\#$                          | -696.26  | -1075.45 |
| $\text{OH}^* + \# = \text{O}^* + \text{H}^\#$                                    | -307.62  | -1254.70 |
| $\text{CO}^* + \text{O}^* = \text{CO}_2^* + */\text{CO}_2 + 2^*$                 | -277.35  | -202.53  |
| $\text{CO}^* + \text{OH}^* = \text{COOH}^* + *$                                  | -42.05   | -188.13  |
| $\text{CO}^* + \text{H}^\# = \text{CHO}^* + \#$                                  | -183.18  | -131.20  |
| $\text{CO}^* + \text{H}^\# = \text{COH}^* + \#$                                  | -1139.51 | -1043.27 |
| $\text{CHO}^* + \text{O}^* = \text{HCOO}^* + *$                                  | -317.14  | -218.93  |
| $\text{COH}^* + \text{O}^* = \text{COOH}^* + *$                                  | -469.28  | -231.69  |
| $\text{HCOO}^* + \# = \text{CO}_2^* + \text{H}^\#/\text{CO}_2 + * + \text{H}^\#$ | -594.75  | -841.71  |
| $\text{COOH}^* + \# = \text{CO}_2^* + \text{H}^\#/\text{CO}_2 + * + \text{H}^\#$ | -519.47  | -825.55  |
| $\text{H}^\# + * = \text{H}^* + \#$                                              | -292.05  | -706.52  |
| $\text{H}^* + \text{H}^\# = \text{H}_2^* + \#$                                   | -377.20  |          |
| $2\text{H}^* = \text{H}_2 + 2^*$                                                 |          | -718.18  |
| $\text{CHO}^* + * = \text{CH}^* + \text{O}^*$                                    | -27.31   | -431.27  |
| $\text{CHO}^* + \text{H}^\# = \text{CH}_2\text{O}^* + \#$                        | -1067.27 | -689.04  |
| $\text{CHO} + \text{H}^\# = \text{CHOH}^* + \#$                                  | -1025.92 | -899.70  |
| $\text{CH}_2\text{O}^* + * = \text{CH}_2^* + \text{O}^*$                         | -371.15  | -429.90  |
| $\text{CHOH}^* + * = \text{CH}^* + \text{OH}^*$                                  | -288.58  | -136.32  |
| $\text{CH}_2\text{O}^* + \text{H}^\# = \text{CH}_3\text{O}^* + \#$               | -792.54  | -742.54  |
| $\text{CH}_2\text{O}^* + \text{H}^\# = \text{CH}_2\text{OH}^* + \#$              | -845.44  | -1042.98 |
| $\text{CHOH}^* + \text{H}^\# = \text{CH}_2\text{OH}^* + \#$                      | -294.85  | -773.74  |
| $\text{CH}_2\text{OH}^* + * = \text{CH}_2^* + \text{OH}^*$                       | -278.20  | -362.96  |
| $\text{CH}^* + \text{H}^\# = \text{CH}_2^* + \#$                                 | -646.40  | -230.98  |
| $\text{CH}_2^* + \text{H}^\# = \text{CH}_3^* + \#$                               | -389.77  | -441.81  |
| $\text{CH}_3^* + \text{H}^\# = \text{CH}_4^* + \#$                               | -510.94  | -956.58  |

#### S4. Zero-point energy of adsorbed species and transition states

**Table S3.** Zero-point energy (ZPE, in eV) of adsorbed species on MoS<sub>2-v</sub>(001), Cu/MoS<sub>2-v</sub>(001), Mo and S edge. \* and # denote the S vacancy and S site, respectively.

| Species             | MoS <sub>2-v</sub> (001) | Cu/MoS <sub>2-v</sub> (001) | Mo edge | S edge |
|---------------------|--------------------------|-----------------------------|---------|--------|
| H <sub>2</sub> O*   | 0.65                     | 0.66                        | 0.65    | 0.65   |
| OH*                 | 0.39                     | 0.38                        | 0.36    | 0.38   |
| H*                  | 0.16                     | 0.19                        | 0.14    | 0.19   |
| H <sup>#</sup>      |                          |                             | 0.21    | 0.21   |
| O*                  | 0.09                     | 0.08                        | 0.07    | 0.08   |
| CO*                 | 0.18                     | 0.20                        | 0.20    | 0.20   |
| CO <sub>2</sub> *   | 0.31                     | 0.31                        | 0.32    |        |
| HCOO*               | 0.61                     | 0.62                        | 0.64    | 0.64   |
| COOH*               | 0.64                     | 0.65                        | 0.64    | 0.64   |
| CHO*                | 0.49                     | 0.51                        | 0.49    | 0.51   |
| COH*                | 0.49                     | 0.51                        | 0.50    | 0.50   |
| CH <sub>2</sub> O*  | 0.82                     | 0.82                        | 0.79    | 0.77   |
| CHOH*               | 0.75                     | 0.79                        | 0.80    | 0.83   |
| CH <sub>3</sub> O*  | 1.14                     | 1.12                        |         |        |
| CH <sub>2</sub> OH* | 1.13                     | 1.14                        | 1.11    | 1.12   |
| CH*                 | 0.38                     | 0.38                        | 0.39    | 0.39   |
| CH <sub>2</sub> *   | 0.63                     | 0.68                        | 0.64    | 0.67   |
| CH <sub>3</sub> *   | 0.91                     | 0.95                        | 0.93    | 0.94   |
| CH <sub>4</sub> *   | 1.19                     |                             | 1.23    | 1.20   |

**Table S4.** The zero-point energy (ZPE, in eV) at the transition states of various elementary reactions on MoS<sub>2-v</sub>(001), Cu/MoS<sub>2-v</sub>(001), Mo and S edge. \* and # denote the S vacancy and S site, respectively. Adsorbed and gaseous CH<sub>4</sub> are used for MoS<sub>2-v</sub>(001) and Cu/MoS<sub>2-v</sub>(001), respectively. Adsorbed and gaseous CO<sub>2</sub> are used for the Mo and S edge, respectively.

| Elementary reactions                                                | MoS <sub>2-v</sub> (001) | Cu/MoS <sub>2-v</sub> (001) |
|---------------------------------------------------------------------|--------------------------|-----------------------------|
| H <sub>2</sub> O* + * = OH* + H*                                    | 0.48                     | 0.50                        |
| OH* + * = O* + H*                                                   | 0.21                     | 0.20                        |
| 2OH* = H <sub>2</sub> O* + O*                                       | 0.63                     | 0.85                        |
| CO* + O* = CO <sub>2</sub> * + *                                    | 0.27                     | 0.26                        |
| CO* + OH* = COOH* + *                                               | 0.54                     | 0.57                        |
| CO* + H* = CHO* + *                                                 | 0.42                     | 0.43                        |
| CO* + H* = COH* + *                                                 | 0.34                     | 0.38                        |
| CHO* + O* = HCOO* + *                                               | 0.57                     | 0.57                        |
| COH* + O* = COOH* + *                                               | 0.60                     | 0.56                        |
| HCOO* + * = CO <sub>2</sub> * + H*                                  | 0.47                     | 0.49                        |
| COOH* + * = CO <sub>2</sub> * + H*                                  | 0.42                     | 0.43                        |
| 2H* = H <sub>2</sub> + 2*                                           | 0.34                     | 0.35                        |
| CHO* + * = CH* + O*                                                 | 0.44                     | 0.43                        |
| CHO* + H* = CH <sub>2</sub> O* + *                                  | 0.64                     | 0.63                        |
| CHO* + H* = CHOH* + *                                               | 0.63                     | 0.60                        |
| COH* + H* = CHOH* + *                                               | 0.63                     | 0.65                        |
| CH <sub>2</sub> O* + * = CH <sub>2</sub> * + O*                     | 0.74                     | 0.74                        |
| CHOH* + * = CH* + OH*                                               | 0.73                     | 0.72                        |
| CH <sub>2</sub> O* + H* = CH <sub>3</sub> O* + *                    | 0.99                     | 0.92                        |
| CH <sub>2</sub> O* + H* = CH <sub>2</sub> OH* + *                   | 0.95                     | 0.90                        |
| CHOH* + H* = CH <sub>2</sub> OH* + *                                | 0.99                     | 0.94                        |
| CH <sub>3</sub> O* + * = CH <sub>3</sub> * + O*                     | 0.98                     | 0.93                        |
| CH <sub>2</sub> OH* + * = CH <sub>2</sub> * + OH*                   | 0.99                     | 1.03                        |
| CH* + H* = CH <sub>2</sub> * + *                                    | 0.52                     | 0.50                        |
| CH <sub>2</sub> * + H* = CH <sub>3</sub> * + *                      | 0.81                     | 0.84                        |
| CH <sub>3</sub> * + H* = CH <sub>4</sub> * + */CH <sub>4</sub> + 2* | 1.10                     | 1.01                        |

| Elementary reactions                                                             | Mo edge | S edge |
|----------------------------------------------------------------------------------|---------|--------|
| $\text{H}_2\text{O}^* + \# = \text{OH}^* + \text{H}^\#$                          | 0.49    | 0.51   |
| $\text{OH}^* + \# = \text{O}^* + \text{H}^\#$                                    | 0.21    | 0.21   |
| $\text{CO}^* + \text{O}^* = \text{CO}_2^* + */\text{CO}_2 + 2^*$                 | 0.27    | 0.28   |
| $\text{CO}^* + \text{OH}^* = \text{COOH}^* + *$                                  | 0.60    | 0.55   |
| $\text{CO}^* + \text{H}^\# = \text{CHO}^* + \#$                                  | 0.41    | 0.24   |
| $\text{CO}^* + \text{H}^\# = \text{COH}^* + \#$                                  | 0.33    | 0.33   |
| $\text{CHO}^* + \text{O}^* = \text{HCOO}^* + *$                                  | 0.55    | 0.56   |
| $\text{COH}^* + \text{O}^* = \text{COOH}^* + *$                                  | 0.54    | 0.54   |
| $\text{HCOO}^* + \# = \text{CO}_2^* + \text{H}^\#/\text{CO}_2 + * + \text{H}^\#$ | 0.51    | 0.46   |
| $\text{COOH}^* + \# = \text{CO}_2^* + \text{H}^\#/\text{CO}_2 + * + \text{H}^\#$ | 0.48    | 0.45   |
| $\text{H}^\# + * = \text{H}^* + \#$                                              | 0.13    | 0.13   |
| $\text{H}^* + \text{H}^\# = \text{H}_2^* + \#$                                   | 0.32    |        |
| $2\text{H}^* = \text{H}_2 + 2^*$                                                 |         | 0.34   |
| $\text{CHO}^* + * = \text{CH}^* + \text{O}^*$                                    | 0.48    | 0.42   |
| $\text{CHO}^* + \text{H}^\# = \text{CH}_2\text{O}^* + \#$                        | 0.64    | 0.65   |
| $\text{CHO}^* + \text{H}^\# = \text{CHOH}^* + \#$                                | 0.60    | 0.66   |
| $\text{CH}_2\text{O}^* + * = \text{CH}_2^* + \text{O}^*$                         | 0.74    | 0.74   |
| $\text{CHOH}^* + * = \text{CH}^* + \text{OH}^*$                                  | 0.74    | 0.74   |
| $\text{CH}_2\text{O}^* + \text{H}^\# = \text{CH}_3\text{O}^* + \#$               | 0.91    | 0.94   |
| $\text{CH}_2\text{O}^* + \text{H}^\# = \text{CH}_2\text{OH}^* + \#$              | 0.93    | 0.96   |
| $\text{CHOH}^* + \text{H}^\# = \text{CH}_2\text{OH}^* + \#$                      | 0.98    | 0.95   |
| $\text{CH}_2\text{OH}^* + * = \text{CH}_2^* + \text{OH}^*$                       | 1.03    | 1.02   |
| $\text{CH}^* + \text{H}^\# = \text{CH}_2^* + \#$                                 | 0.49    | 0.54   |
| $\text{CH}_2^* + \text{H}^\# = \text{CH}_3^* + \#$                               | 0.81    | 0.84   |
| $\text{CH}_3^* + \text{H}^\# = \text{CH}_4^* + \#$                               | 1.10    | 1.08   |

## S5. Structures for intermediates adsorption on various surfaces

**Figure S2.** Optimized configurations for (a) H<sub>2</sub>O (b) OH (c) H (at Mo) (d) O (e) CO (f) HCOO (g) COOH (h) CHO (i) COH (j) CH<sub>2</sub>O (k) CHOH (l) CH<sub>2</sub>OH (m) CH (n) CH<sub>2</sub> (o) CH<sub>3</sub> (p) CH<sub>4</sub> (q) CH<sub>3</sub>O (r) CO<sub>2</sub> (s) H (at S) (t) H<sub>2</sub> adsorption on (A) MoS<sub>2-v</sub>(001), (B) Cu/MoS<sub>2-v</sub>(001), (C) Mo edge and (D) S edge. The green, blue, yellow, grey, red and white balls represent Mo, Cu, S, C, O and H atoms, respectively. The notation is used throughout the paper.

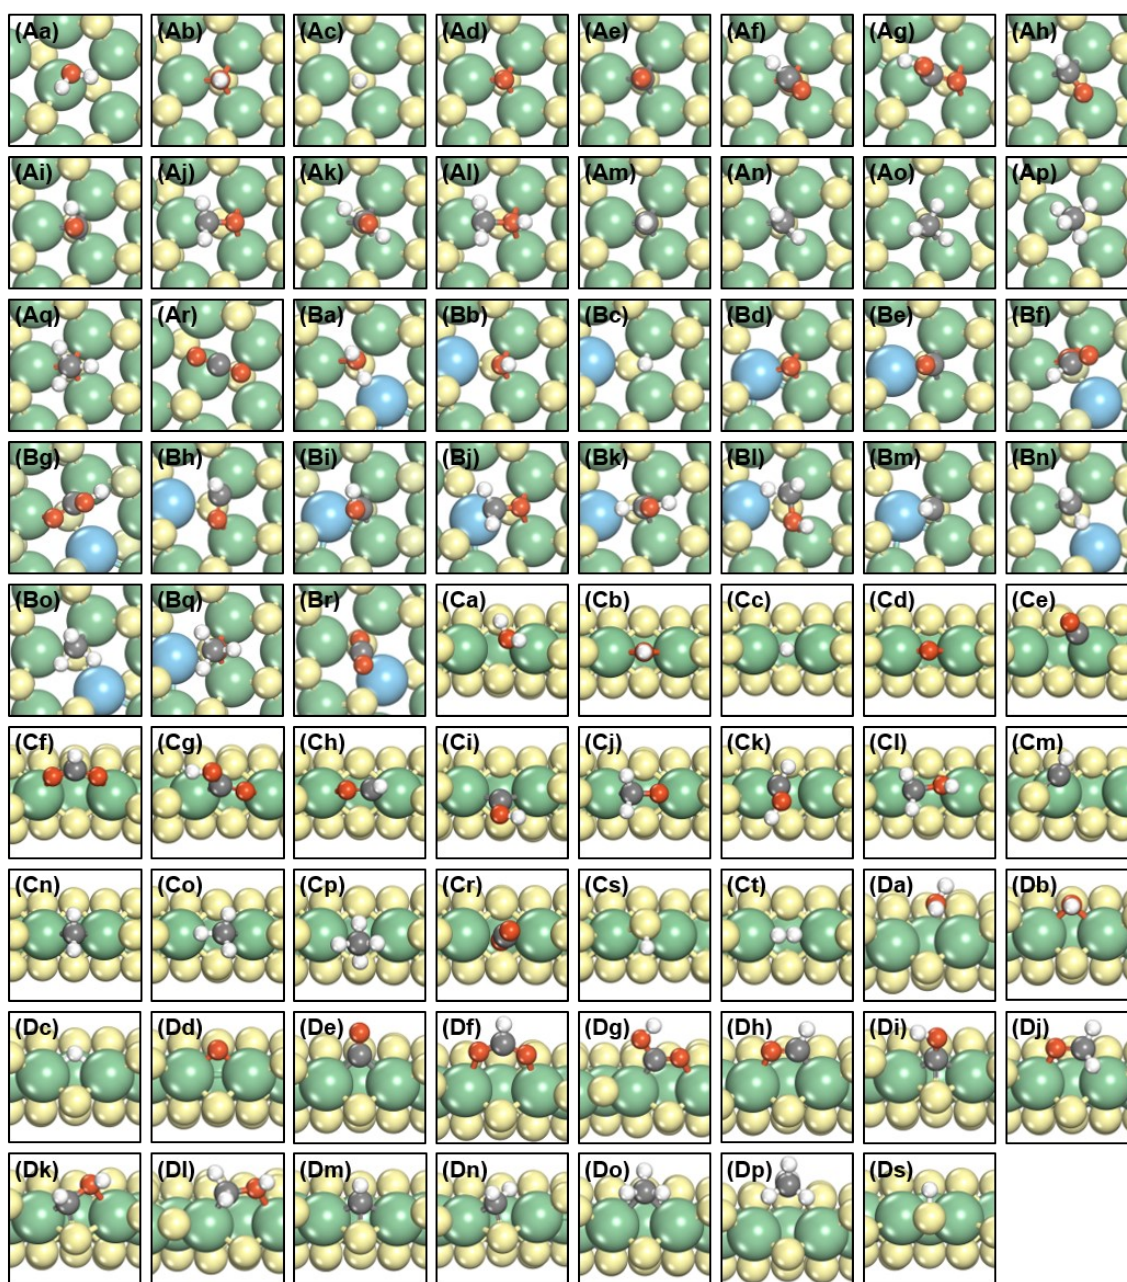

## S6. Structures at transition states of elementary reactions on various surfaces

**Figure S3.** Optimized configurations at the transition states of (a)  $\text{H}_2\text{O}^* + * = \text{OH}^* + \text{H}^*$  (b)  $\text{OH}^* + * = \text{O}^* + \text{H}^*$  (c)  $\text{CO}^* + \text{O}^* = \text{CO}_2^* + *$  (d)  $\text{CO}^* + \text{OH}^* = \text{COOH}^* + *$  (e)  $\text{CO}^* + \text{H}^* = \text{CHO}^* + *$  (f)  $\text{CO}^* + \text{H}^* = \text{COH}^* + *$  (g)  $\text{CHO}^* + \text{O}^* = \text{HCOO}^* + *$  (h)  $\text{COH}^* + \text{O}^* = \text{COOH}^* + *$  (i)  $\text{HCOO}^* + * = \text{CO}_2^* + \text{H}^*$  (j)  $\text{COOH}^* + * = \text{CO}_2^* + \text{H}^*$  (k)  $2\text{H}^* = \text{H}_2 + 2^*$  (l)  $2\text{OH}^* = \text{H}_2\text{O}^* + \text{O}^*$  (m)  $\text{CHO}^* + * = \text{CH}^* + \text{O}^*$  (n)  $\text{CHO}^* + \text{H}^* = \text{CH}_2\text{O}^* + *$  (o)  $\text{CHO}^* + \text{H}^* = \text{CHOH}^* + *$  (p)  $\text{CH}_2\text{O}^* + * = \text{CH}_2^* + \text{O}^*$  (q)  $\text{CHOH}^* + * = \text{CH}^* + \text{OH}^*$  (r)  $\text{CH}_2\text{O}^* + \text{H}^* = \text{CH}_3\text{O}^* + *$  (s)  $\text{CH}_2\text{O}^* + \text{H}^* = \text{CH}_2\text{OH}^* + *$  (t)  $\text{CHOH}^* + \text{H}^* = \text{CH}_2\text{OH}^* + *$  (u)  $\text{CH}_3\text{O}^* + * = \text{CH}_3^* + \text{O}^*$  (v)  $\text{CH}_2\text{OH}^* + * = \text{CH}_2^* + \text{OH}^*$  (w)  $\text{CH}^* + \text{H}^* = \text{CH}_2^* + *$  (x)  $\text{CH}_2^* + \text{H}^* = \text{CH}_3^* + *$  (y)  $\text{CH}_3^* + \text{H}^* = \text{CH}_4^* + */\text{CH}_4 + 2^*$  (z)  $\text{COH}^* + \text{H}^* = \text{CHOH}^* + *$  on (A)  $\text{MoS}_{2-v}(001)$  and (B)  $\text{Cu}/\text{MoS}_{2-v}(001)$ . \* denotes the S vacancy. Adsorbed and gaseous  $\text{CH}_4$  are used for  $\text{MoS}_{2-v}(001)$  and  $\text{Cu}/\text{MoS}_{2-v}(001)$ , respectively.

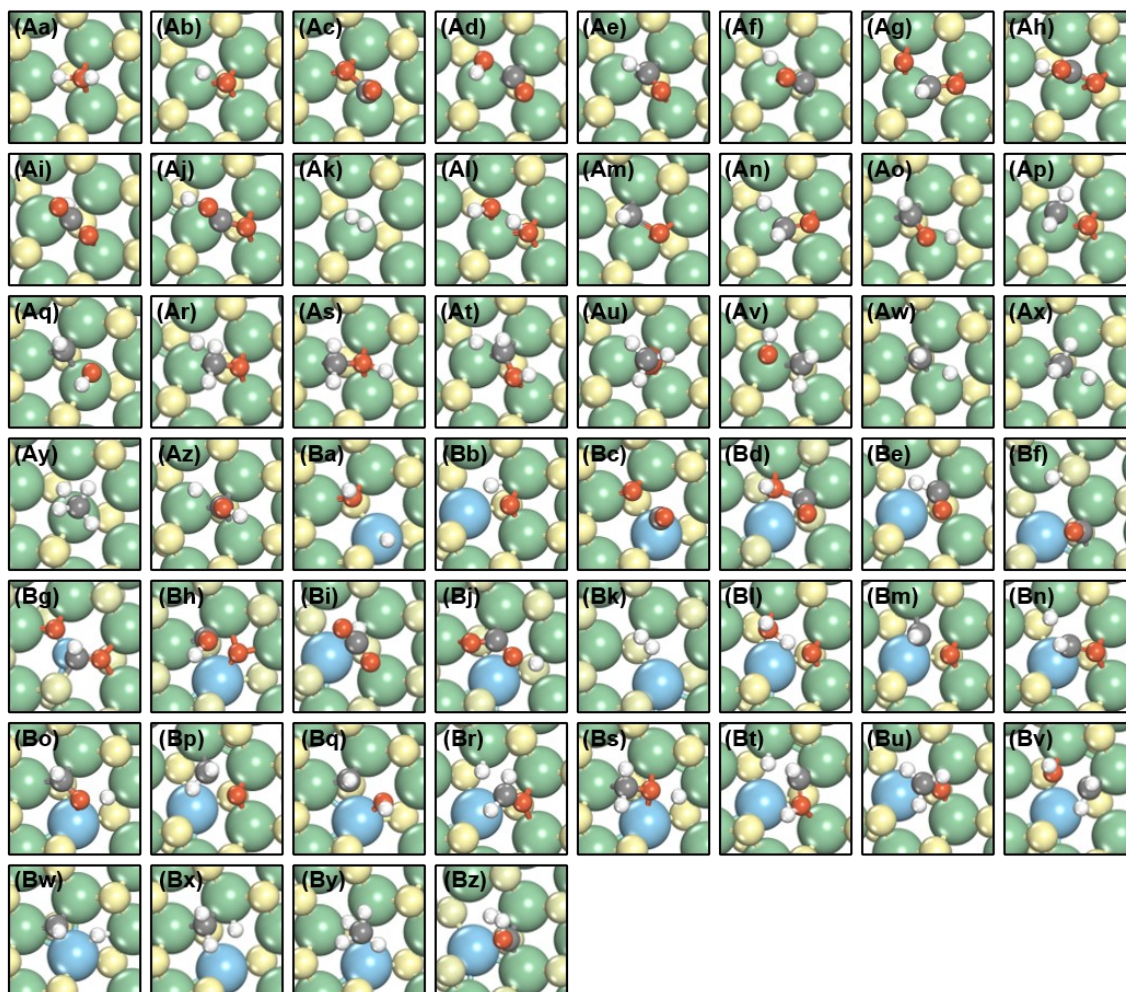

**Figure S4.** Optimized configurations at the transition states of (a)  $\text{H}_2\text{O}^* + \# = \text{OH}^* + \text{H}^\#$  (b)  $\text{OH}^* + \# = \text{O}^* + \text{H}^\#$  (c)  $\text{CO}^* + \text{O}^* = \text{CO}_2^* + \text{*}/\text{CO}_2 + 2\text{*}$  (d)  $\text{CO}^* + \text{OH}^* = \text{COOH}^* + \text{*}$  (e)  $\text{CO}^* + \text{H}^\# = \text{CHO}^* + \#$  (f)  $\text{CO}^* + \text{H}^\# = \text{COH}^* + \#$  (g)  $\text{CHO}^* + \text{O}^* = \text{HCOO}^* + \text{*}$  (h)  $\text{COH}^* + \text{O}^* = \text{COOH}^* + \text{*}$  (i)  $\text{HCOO}^* + \# = \text{CO}_2^* + \text{H}^\#/\text{CO}_2 + \text{*} + \text{H}^\#$  (j)  $\text{COOH}^* + \# = \text{CO}_2^* + \text{H}^\#/\text{CO}_2 + \text{*} + \text{H}^\#$  (k)  $\text{H}^* + \text{H}^\# = \text{H}_2 + \text{*} + \#$  (l)  $\text{H}^\# + \text{*} = \text{H}^* + \#$  (m)  $\text{CHO}^* + \text{*} = \text{CH}^* + \text{O}^*$  (n)  $\text{CHO}^* + \text{H}^\# = \text{CH}_2\text{O}^* + \#$  (o)  $\text{CHO}^* + \text{H}^\# = \text{CHOH}^* + \#$  (p)  $\text{CH}_2\text{O}^* + \text{*} = \text{CH}_2^* + \text{O}^*$  (q)  $\text{CHOH}^* + \text{*} = \text{CH}^* + \text{OH}^*$  (r)  $\text{CH}_2\text{O}^* + \text{H}^\# = \text{CH}_3\text{O}^* + \#$  (s)  $\text{CH}_2\text{O}^* + \text{H}^\# = \text{CH}_2\text{OH}^* + \#$  (t)  $\text{CHOH}^* + \text{H}^\# = \text{CH}_2\text{OH}^* + \#$  (u)  $\text{CH}_2\text{OH}^* + \text{*} = \text{CH}_2^* + \text{OH}^*$  (v)  $\text{CH}^* + \text{H}^\# = \text{CH}_2^* + \#$  (w)  $\text{CH}_2^* + \text{H}^\# = \text{CH}_3^* + \#$  (x)  $\text{CH}_3^* + \text{H}^\# = \text{CH}_4^* + \#$  on (A) Mo edge and (B) S edge. \* and # denote the S vacancy and S site on the  $\text{MoS}_2$  edges, respectively. Adsorbed and gaseous  $\text{CO}_2$  are used for the Mo and S edge, respectively.

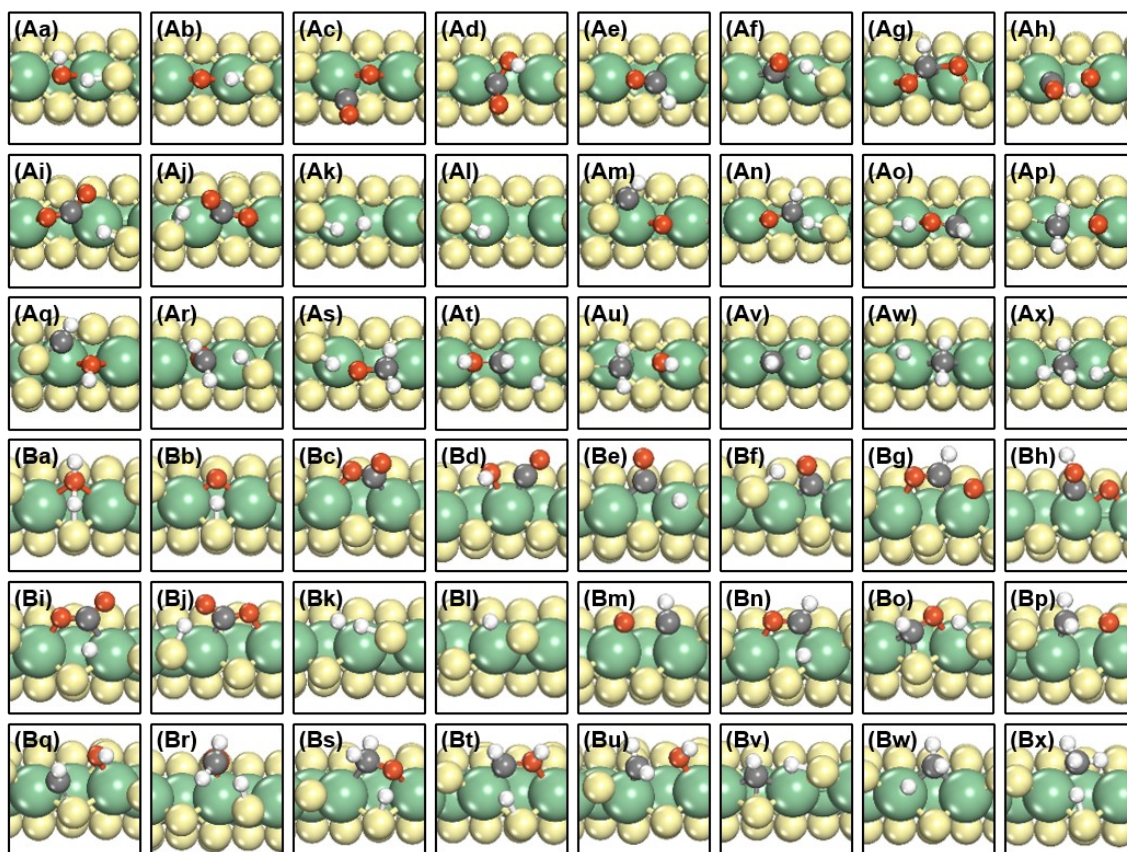

**Table S5.** The distance (in Å) between the atoms involved in bond formation and scission at the transition states of various elementary reactions on MoS<sub>2-v</sub>(001), Cu/MoS<sub>2-v</sub>(001), Mo and S edge. \* and # denote the S vacancy and S site, respectively. Adsorbed and gaseous CH<sub>4</sub> are used for MoS<sub>2-v</sub>(001) and Cu/MoS<sub>2-v</sub>(001), respectively. Adsorbed and gaseous CO<sub>2</sub> are used for the Mo and S edge, respectively.

| Elementary reactions                              | MoS <sub>2-v</sub> (001) | Cu/MoS <sub>2-v</sub> (001) |
|---------------------------------------------------|--------------------------|-----------------------------|
| H <sub>2</sub> O* + * = OH* + H*                  | 1.19                     | 1.62                        |
| OH* + * = O* + H*                                 | 1.32                     | 1.49                        |
| 2OH* = H <sub>2</sub> O* + O*                     | 1.32                     | 1.18                        |
| CO* + O* = CO <sub>2</sub> * + *                  | 1.59                     | 2.04                        |
| CO* + OH* = COOH* + *                             | 1.79                     | 1.62                        |
| CO* + H* = CHO* + *                               | 1.16                     | 1.18                        |
| CO* + H* = COH* + *                               | 1.35                     | 1.38                        |
| CHO* + O* = HCOO* + *                             | 1.82                     | 1.92                        |
| COH* + O* = COOH* + *                             | 1.37                     | 1.87                        |
| HCOO* + * = CO <sub>2</sub> * + H*                | 1.59                     | 1.65                        |
| COOH* + * = CO <sub>2</sub> * + H*                | 1.43                     | 1.39                        |
| 2H* = H <sub>2</sub> + 2*                         | 0.76                     | 0.77                        |
| CHO* + * = CH* + O*                               | 1.68                     | 1.87                        |
| CHO* + H* = CH <sub>2</sub> O* + *                | 1.65                     | 1.69                        |
| CHO* + H* = CHOH* + *                             | 1.39                     | 1.37                        |
| COH* + H* = CHOH* + *                             | 1.57                     | 1.59                        |
| CH <sub>2</sub> O* + * = CH <sub>2</sub> * + O*   | 1.88                     | 1.90                        |
| CHOH* + * = CH* + OH*                             | 1.99                     | 2.04                        |
| CH <sub>2</sub> O* + H* = CH <sub>3</sub> O* + *  | 1.53                     | 1.94                        |
| CH <sub>2</sub> O* + H* = CH <sub>2</sub> OH* + * | 1.23                     | 1.45                        |
| CHOH* + H* = CH <sub>2</sub> OH* + *              | 1.43                     | 1.76                        |
| CH <sub>3</sub> O* + * = CH <sub>3</sub> * + O*   | 2.13                     | 2.49                        |
| CH <sub>2</sub> OH* + * = CH <sub>2</sub> * + OH* | 1.87                     | 1.97                        |
| CH* + H* = CH <sub>2</sub> * + *                  | 1.67                     | 2.14                        |
| CH <sub>2</sub> * + H* = CH <sub>3</sub> * + *    | 1.53                     | 1.73                        |

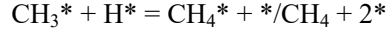

1.66

2.01

| Elementary reactions                                                              | Mo edge | S edge |
|-----------------------------------------------------------------------------------|---------|--------|
| $\text{H}_2\text{O}^* + \# = \text{OH}^* + \text{H}^\#$                           | 1.45    | 1.27   |
| $\text{OH}^* + \# = \text{O}^* + \text{H}^\#$                                     | 1.93    | 1.40   |
| $\text{CO}^* + \text{O}^* = \text{CO}_2^* + ^*/\text{CO}_2 + 2^*$                 | 1.77    | 1.35   |
| $\text{CO}^* + \text{OH}^* = \text{COOH}^* + ^*$                                  | 1.38    | 1.72   |
| $\text{CO}^* + \text{H}^\# = \text{CHO}^* + \#$                                   | 1.22    | 2.26   |
| $\text{CO}^* + \text{H}^\# = \text{COH}^* + \#$                                   | 1.40    | 1.46   |
| $\text{CHO}^* + \text{O}^* = \text{HCOO}^* + ^*$                                  | 1.68    | 1.96   |
| $\text{COH}^* + \text{O}^* = \text{COOH}^* + ^*$                                  | 2.01    | 1.87   |
| $\text{HCOO}^* + \# = \text{CO}_2^* + \text{H}^\#/\text{CO}_2 + ^* + \text{H}^\#$ | 2.02    | 1.55   |
| $\text{COOH}^* + \# = \text{CO}_2^* + \text{H}^\#/\text{CO}_2 + ^* + \text{H}^\#$ | 1.57    | 1.50   |
| $\text{H}^\# + ^* = \text{H}^* + \#$                                              | 1.56    | 1.82   |
| $\text{H}^* + \text{H}^\# = \text{H}_2^* + \#$                                    | 1.52    |        |
| $2\text{H}^* = \text{H}_2 + 2^*$                                                  |         | 1.51   |
| $\text{CHO}^* + ^* = \text{CH}^* + \text{O}^*$                                    | 2.20    | 2.08   |
| $\text{CHO}^* + \text{H}^\# = \text{CH}_2\text{O}^* + \#$                         | 1.44    | 1.75   |
| $\text{CHO}^* + \text{H}^\# = \text{CHOH}^* + \#$                                 | 1.28    | 1.46   |
| $\text{CH}_2\text{O}^* + ^* = \text{CH}_2^* + \text{O}^*$                         | 2.09    | 2.05   |
| $\text{CHOH}^* + ^* = \text{CH}^* + \text{OH}^*$                                  | 1.87    | 2.29   |
| $\text{CH}_2\text{O}^* + \text{H}^\# = \text{CH}_3\text{O}^* + \#$                | 1.82    | 1.61   |
| $\text{CH}_2\text{O}^* + \text{H}^\# = \text{CH}_2\text{OH}^* + \#$               | 1.47    | 1.35   |
| $\text{CHOH}^* + \text{H}^\# = \text{CH}_2\text{OH}^* + \#$                       | 2.18    | 1.64   |
| $\text{CH}_2\text{OH}^* + ^* = \text{CH}_2^* + \text{OH}^*$                       | 2.12    | 2.14   |
| $\text{CH}^* + \text{H}^\# = \text{CH}_2^* + \#$                                  | 1.74    | 1.81   |
| $\text{CH}_2^* + \text{H}^\# = \text{CH}_3^* + \#$                                | 2.10    | 1.87   |
| $\text{CH}_3^* + \text{H}^\# = \text{CH}_4^* + \#$                                | 1.69    | 1.57   |

## S7. Coverage of species via microkinetic modeling

**Table S6.** Coverage (in ML) of species on Cu/MoS<sub>2-v</sub>(001), Mo edge, and S edge at 550 K, 1 bar and CO/H<sub>2</sub>O ratio of 1 calculated via microkinetic modeling. \* and # denote the S vacancy and S site, respectively.

| Species             | Cu/MoS <sub>2-v</sub> (001) | Mo edge                | S edge                 |
|---------------------|-----------------------------|------------------------|------------------------|
| H <sub>2</sub> O*   | 2.59×10 <sup>-7</sup>       | 1.81×10 <sup>-7</sup>  | 4.57×10 <sup>-5</sup>  |
| CO*                 | 6.95×10 <sup>-4</sup>       | 3.50×10 <sup>-4</sup>  | 2.12×10 <sup>-2</sup>  |
| OH*                 | 9.87×10 <sup>-1</sup>       | 5.00×10 <sup>-1</sup>  | 2.55×10 <sup>-3</sup>  |
| H*                  | 7.09×10 <sup>-4</sup>       | 2.66×10 <sup>-10</sup> | 3.61×10 <sup>-3</sup>  |
| O*                  | 5.23×10 <sup>-5</sup>       | 6.78×10 <sup>-8</sup>  | 1.45×10 <sup>-4</sup>  |
| H <sub>2</sub> *    |                             | 7.05×10 <sup>-14</sup> |                        |
| CO <sub>2</sub> *   | 2.88×10 <sup>-16</sup>      | 1.76×10 <sup>-14</sup> |                        |
| HCOO*               | 5.44×10 <sup>-4</sup>       | 7.86×10 <sup>-19</sup> | 1.36×10 <sup>-8</sup>  |
| COOH*               | 3.60×10 <sup>-11</sup>      | 4.07×10 <sup>-13</sup> | 3.16×10 <sup>-5</sup>  |
| CHO*                | 7.97×10 <sup>-11</sup>      | 9.16×10 <sup>-13</sup> | 3.27×10 <sup>-7</sup>  |
| COH*                | 9.78×10 <sup>-9</sup>       | 4.34×10 <sup>-19</sup> | 7.73×10 <sup>-8</sup>  |
| CH <sub>2</sub> O*  | 3.21×10 <sup>-15</sup>      | 6.95×10 <sup>-14</sup> | 7.34×10 <sup>-11</sup> |
| CHOH*               | 2.78×10 <sup>-14</sup>      | 2.88×10 <sup>-19</sup> | 3.97×10 <sup>-10</sup> |
| CH <sub>3</sub> O*  | 9.61×10 <sup>-3</sup>       |                        |                        |
| CH <sub>2</sub> OH* | 1.00×10 <sup>-18</sup>      | 5.42×10 <sup>-16</sup> | 3.93×10 <sup>-12</sup> |
| CH*                 | 1.86×10 <sup>-7</sup>       | 1.11×10 <sup>-19</sup> | 2.74×10 <sup>-5</sup>  |
| CH <sub>2</sub> *   | 4.24×10 <sup>-8</sup>       | 1.02×10 <sup>-20</sup> | 1.53×10 <sup>-6</sup>  |
| CH <sub>3</sub> *   | 1.38×10 <sup>-6</sup>       | 5.92×10 <sup>-19</sup> | 7.45×10 <sup>-7</sup>  |
| CH <sub>4</sub> *   |                             | 1.52×10 <sup>-25</sup> | 1.65×10 <sup>-13</sup> |
| H <sup>#</sup>      |                             | 2.56×10 <sup>-6</sup>  | 1.33×10 <sup>-5</sup>  |

### S8. Ratio of coverage of intermediates and vacant sites as a function of temperature

**Figure S5.** Ratio of coverage of intermediates and vacant sites as a function of temperature on the Mo edge.

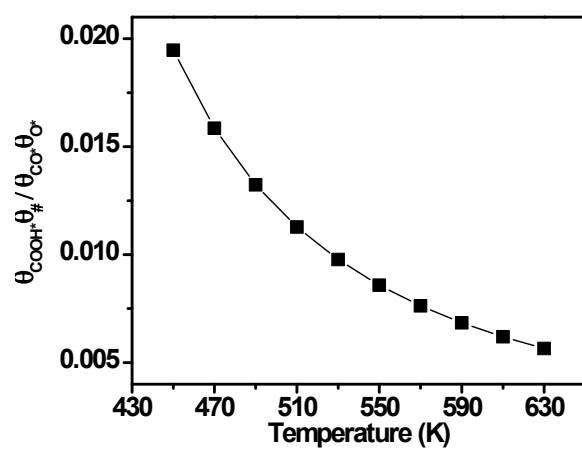

# S9. Converged Cartesian coordinates for species adsorption and transition state

## 1. Adsorption of species on MoS<sub>2-v</sub>(001)

| H <sub>2</sub> O* |           |           |           |    |           |           |           |                   |           |           |           |
|-------------------|-----------|-----------|-----------|----|-----------|-----------|-----------|-------------------|-----------|-----------|-----------|
| Mo                | 1.865918  | -0.024101 | 1.536531  | Mo | 10.088291 | 1.590150  | 1.456268  | S                 | 9.230164  | 3.203366  | -0.032503 |
| Mo                | 1.872142  | 3.175100  | 1.547184  | Mo | 12.875798 | -6.391068 | 1.595682  | S                 | 11.993755 | -4.789112 | 0.017142  |
| Mo                | 1.852586  | 6.362945  | 1.508979  | Mo | 12.882245 | -3.179383 | 1.536913  | S                 | 11.967422 | -1.615505 | -0.162642 |
| Mo                | 4.653085  | -1.604457 | 1.531009  | Mo | 12.854389 | -0.005883 | 1.518833  | S                 | 11.967431 | 1.608672  | -0.029310 |
| Mo                | 4.653906  | 1.568441  | 1.536973  | S  | 0.927960  | 1.595112  | 0.060363  | S                 | 0.888827  | 1.582242  | 3.176870  |
| Mo                | 4.645913  | 4.760103  | 1.524218  | S  | 0.935795  | 4.764842  | 0.030349  | S                 | 0.853065  | 4.811694  | 3.146218  |
| Mo                | 7.409243  | -3.191099 | 1.505933  | S  | 0.925802  | 7.996402  | 0.025813  | S                 | 0.822717  | 7.942811  | 3.127076  |
| Mo                | 7.456942  | -0.004055 | 1.488787  | S  | 3.686909  | 0.010680  | 0.060722  | S                 | 3.679806  | -0.002637 | 3.177745  |
| Mo                | 7.431788  | 3.144566  | 1.486572  | S  | 3.682777  | 3.186740  | 0.059633  | S                 | 3.693961  | 3.195986  | 3.177621  |
| Mo                | 10.189602 | -4.806786 | 1.512377  | S  | 3.688237  | 6.396273  | 0.046069  | S                 | 3.681970  | 6.386868  | 3.167125  |
| Mo                | 10.201507 | -1.553087 | 1.584649  | S  | 6.445677  | -1.554400 | 0.005504  | S                 | 6.540885  | -1.541738 | 3.125488  |
| Mo                | 10.162238 | 1.531707  | 1.434052  | S  | 6.441040  | 1.581213  | -0.000761 | S                 | 6.542306  | 1.578765  | 3.125512  |
| Mo                | 12.924484 | -6.387918 | 1.528424  | S  | 6.430905  | 4.804764  | 0.010599  | S                 | 6.504751  | 4.805530  | 3.120632  |
| Mo                | 12.927818 | -3.157791 | 1.503362  | S  | 9.204514  | -3.186069 | -0.069343 | S                 | 9.277531  | -3.062672 | 3.086730  |
| Mo                | 12.924484 | -6.387918 | 1.528424  | S  | 9.209887  | -0.009556 | -0.086930 | S                 | 11.962386 | -4.734703 | 3.125452  |
| Mo                | 12.927818 | -3.157791 | 1.503362  | S  | 9.216970  | 3.214343  | -0.055494 | S                 | 11.873795 | 1.476396  | 3.090828  |
| Mo                | 12.903257 | -0.037811 | 1.436381  | S  | 12.002016 | -4.796956 | 0.009380  | S                 | 9.229214  | 3.139501  | 3.089259  |
| S                 | 0.958710  | 1.582361  | -0.013340 | S  | 11.992515 | -1.601319 | -0.076750 | O                 | 11.922179 | -1.567164 | 2.586962  |
| S                 | 0.939681  | 4.751450  | -0.045592 | S  | 11.989913 | 1.607882  | -0.025641 |                   |           |           |           |
| S                 | 0.953541  | 7.968912  | -0.071056 | S  | 0.900061  | 1.587028  | 3.178668  | CO <sub>2</sub> * |           |           |           |
| S                 | 3.717102  | -0.015794 | -0.017943 | S  | 0.877592  | 4.805243  | 3.147852  | Mo                | 1.865598  | 0.007151  | 1.455460  |
| S                 | 3.714412  | 3.160801  | -0.019736 | S  | 0.853110  | 7.962690  | 3.132768  | Mo                | 1.874110  | 3.203916  | 1.466838  |
| S                 | 3.724124  | 6.365706  | -0.029981 | S  | 3.701469  | 0.004076  | 3.176575  | Mo                | 1.858686  | 6.393608  | 1.417364  |
| S                 | 6.493897  | -1.583757 | -0.049955 | S  | 3.706097  | 3.196014  | 3.173524  | Mo                | 4.664326  | -1.560594 | 1.441346  |
| S                 | 6.485120  | 1.543606  | -0.060701 | S  | 3.685455  | 6.392424  | 3.160023  | Mo                | 4.662990  | 1.614754  | 1.449063  |
| S                 | 6.488451  | 4.767370  | -0.046834 | S  | 6.548576  | -1.542708 | 3.116504  | Mo                | 4.663788  | 4.813216  | 1.441507  |
| S                 | 9.298948  | -3.139284 | -0.011907 | S  | 6.553596  | 1.582655  | 3.120711  | Mo                | 7.462100  | -3.114021 | 1.392461  |
| S                 | 9.278821  | -0.086610 | -0.043196 | S  | 6.489189  | 4.800071  | 3.111401  | Mo                | 7.471978  | 0.040889  | 1.353176  |
| S                 | 9.277287  | 3.168831  | -0.084686 | S  | 9.242912  | -3.085469 | 3.088666  | Mo                | 7.447684  | 3.206250  | 1.383504  |
| S                 | 12.035040 | -4.776633 | -0.037775 | S  | 11.949515 | -4.752743 | 3.118036  | Mo                | 10.209051 | -4.723084 | 1.388242  |
| S                 | 11.948989 | -1.620871 | -0.029539 | S  | 11.854091 | 1.510308  | 3.092758  | Mo                | 10.218463 | -1.512250 | 1.291547  |
| S                 | 12.020622 | 1.602064  | -0.089468 | S  | 9.217289  | 3.144012  | 3.082176  | Mo                | 10.156160 | 1.551496  | 1.310372  |
| S                 | 0.946870  | 1.569630  | 3.102952  | O  | 11.908138 | -1.584424 | 2.682342  | Mo                | 12.910469 | -6.388903 | 1.452085  |
| S                 | 0.916860  | 4.813105  | 3.088857  | H  | 11.893127 | -1.596280 | 3.659289  | Mo                | 12.920196 | -3.139563 | 1.378574  |
| S                 | 0.875460  | 7.914354  | 3.061835  |    |           |           |           | Mo                | 12.876887 | -0.043259 | 1.328477  |
| S                 | 3.718320  | -0.025616 | 3.096413  | H* |           |           |           | S                 | 0.953646  | 1.606162  | -0.085465 |
| S                 | 3.731566  | 3.171538  | 3.097343  | Mo | 1.820178  | -0.011923 | 1.609836  | S                 | 0.961864  | 4.772878  | -0.138660 |
| S                 | 3.712469  | 6.361114  | 3.073801  | Mo | 1.826803  | 3.186094  | 1.621377  | S                 | 0.960355  | 7.997995  | -0.156707 |
| S                 | 6.548595  | -1.580704 | 3.066414  | Mo | 1.808693  | 6.372983  | 1.586255  | S                 | 3.718410  | 0.027470  | -0.100694 |
| S                 | 6.559637  | 1.557074  | 3.067865  | Mo | 4.618352  | -1.584451 | 1.612328  | S                 | 3.721223  | 3.208030  | -0.097888 |
| S                 | 6.508057  | 4.748072  | 3.055198  | Mo | 4.617472  | 1.589846  | 1.616900  | S                 | 3.734595  | 6.406283  | -0.115960 |
| S                 | 9.233348  | -3.226682 | 3.045250  | Mo | 4.613729  | 4.793394  | 1.612689  | S                 | 6.490146  | -1.539491 | -0.159423 |
| S                 | 12.006251 | -4.742670 | 3.077897  | Mo | 7.416240  | -3.139862 | 1.560323  | S                 | 6.480200  | 1.607599  | -0.162582 |
| S                 | 11.949580 | 1.494258  | 3.025585  | Mo | 7.433120  | 0.006003  | 1.521312  | S                 | 6.500142  | 4.831325  | -0.138088 |
| S                 | 9.264356  | 3.082051  | 3.037223  | Mo | 7.393625  | 3.182855  | 1.547535  | S                 | 9.295228  | -3.117625 | -0.202627 |
| O                 | 10.724178 | -0.991902 | 3.883424  | Mo | 10.152182 | -4.747273 | 1.531754  | S                 | 9.246723  | 0.002490  | -0.246575 |
| H                 | 11.688120 | -1.150912 | 3.970969  | Mo | 10.161815 | -1.574092 | 1.465367  | S                 | 9.286794  | 3.227176  | -0.190010 |
| H                 | 10.275734 | -1.680565 | 4.424652  | Mo | 10.133022 | 1.550378  | 1.447326  | S                 | 12.058624 | -4.778057 | -0.140907 |
| CO*               |           |           |           | Mo | 12.861410 | -6.394878 | 1.587175  | S                 | 12.019164 | -1.614397 | -0.232295 |
| Mo                | 1.832724  | 0.001286  | 1.597303  | Mo | 12.843484 | -3.183542 | 1.512836  | S                 | 12.025661 | 1.613994  | -0.191158 |
| Mo                | 1.838792  | 3.194391  | 1.604981  | Mo | 12.804616 | 0.000758  | 1.454567  | S                 | 0.937349  | 1.593006  | 3.025133  |
| Mo                | 1.833130  | 6.383954  | 1.583372  | S  | 0.921199  | 1.590911  | 0.058106  | S                 | 0.900992  | 4.842485  | 2.984641  |
| Mo                | 4.622876  | -1.582429 | 1.585383  | S  | 0.925940  | 4.763130  | 0.020085  | S                 | 0.855012  | 7.938815  | 2.956602  |
| Mo                | 4.622064  | 1.595246  | 1.589651  | S  | 0.926659  | 7.974767  | 0.001203  | S                 | 3.727871  | 0.015983  | 3.010094  |
| Mo                | 4.617540  | 4.791118  | 1.585383  | S  | 3.679287  | 0.002551  | 0.064508  | S                 | 3.745100  | 3.217957  | 3.012329  |
| Mo                | 7.403236  | -3.151433 | 1.535964  | S  | 3.681611  | 3.186929  | 0.068572  | S                 | 3.720455  | 6.405970  | 2.988694  |
| Mo                | 7.417106  | 0.008455  | 1.499906  | S  | 3.684678  | 6.384943  | 0.055575  | S                 | 6.583397  | -1.521513 | 2.954734  |
| Mo                | 7.395721  | 3.173582  | 1.536217  | S  | 6.443115  | -1.560636 | 0.007941  | S                 | 6.587493  | 1.600785  | 2.953656  |
| Mo                | 10.140910 | -4.765739 | 1.563392  | S  | 6.435245  | 1.579834  | 0.006949  | S                 | 6.556526  | 4.825769  | 2.952802  |
| Mo                | 10.127045 | -1.563564 | 1.496643  | S  | 6.444182  | 4.810483  | 0.029730  | S                 | 9.361375  | -3.014886 | 2.915449  |
| Mo                | 10.120327 | 1.556455  | 1.488628  | S  | 9.236263  | -3.145035 | -0.050945 | S                 | 12.003858 | -4.706294 | 2.971953  |
| Mo                | 12.874258 | -6.386640 | 1.590344  | S  | 9.213637  | -0.023182 | -0.075047 | S                 | 11.886029 | 1.417939  | 2.939245  |
| Mo                | 12.884964 | -3.173858 | 1.558261  | S  | 9.218832  | 3.208438  | -0.044579 | S                 | 9.291922  | 3.153660  | 2.909697  |
| Mo                | 12.851521 | -0.010504 | 1.524102  | S  | 11.993771 | -4.800845 | -0.012230 | C                 | 10.966359 | -1.031379 | 5.823473  |
| S                 | 0.918770  | 1.600569  | 0.043469  | S  | 11.964236 | -1.617346 | -0.112152 | O                 | 12.071551 | -1.433137 | 5.862251  |
| S                 | 0.932345  | 4.779879  | 0.019338  | S  | 11.974849 | 1.631542  | -0.071766 | O                 | 9.860678  | -0.631009 | 5.782981  |
| S                 | 0.929717  | 7.980191  | 0.009251  | S  | 0.884443  | 1.575731  | 3.171089  | HCOO*             |           |           |           |
| S                 | 3.680660  | 0.007912  | 0.038964  | S  | 0.834596  | 4.806330  | 3.132132  | Mo                | 1.884326  | -0.001407 | 1.610915  |
| S                 | 3.681966  | 3.190322  | 0.040055  | S  | 0.785872  | 7.940902  | 3.099026  | Mo                | 1.890507  | 3.185980  | 1.610180  |
| S                 | 3.687709  | 6.388040  | 0.031319  | S  | 3.676555  | -0.006517 | 3.175775  | Mo                | 1.870528  | 6.378436  | 1.593884  |
| S                 | 6.443406  | -1.565857 | -0.020555 | S  | 3.693324  | 3.193777  | 3.177583  | Mo                | 4.667097  | -1.586145 | 1.590116  |
| S                 | 6.439295  | 1.582415  | -0.019211 | S  | 3.666698  | 6.386346  | 3.161173  | Mo                | 4.672400  | 1.586752  | 1.589907  |
| S                 | 6.449787  | 4.794632  | 0.004684  | S  | 6.540268  | -1.547289 | 3.125881  | Mo                | 4.653605  | 4.785703  | 1.582592  |
| S                 | 9.246659  | -3.171438 | -0.035300 | S  | 6.544401  | 1.572134  | 3.118484  | Mo                | 7.433359  | -3.168886 | 1.526642  |
| S                 | 9.216217  | 0.000402  | -0.060482 | S  | 6.506931  | 4.801776  | 3.121010  | Mo                | 7.492831  | -0.010893 | 1.506251  |
| S                 | 9.240698  | 3.197525  | -0.028186 | S  | 9.292619  | -3.060654 | 3.093999  | Mo                | 7.436148  | 3.178015  | 1.519265  |
| S                 | 11.983468 | -4.789368 | 0.015935  | S  | 11.943574 | -4.739458 | 3.121314  | Mo                | 10.181047 | -4.759681 | 1.531059  |
| S                 | 11.963993 | -1.610292 | -0.042306 | S  | 11.855273 | 1.463907  | 3.096669  | Mo                |           |           |           |

|   |           |           |          |
|---|-----------|-----------|----------|
| S | 11.993963 | -4.765335 | 3.125231 |
| S | 11.904822 | 1.549455  | 3.097064 |
| S | 9.267509  | 3.135763  | 3.062388 |
| C | 11.785342 | -1.461095 | 4.173095 |
| O | 12.448207 | -2.084926 | 4.949790 |
| O | 11.908753 | -1.595577 | 2.767896 |
| H | 11.004441 | -0.716695 | 4.406509 |

|       |           |           |           |
|-------|-----------|-----------|-----------|
| COOH* |           |           |           |
| Mo    | 1.882032  | -0.044832 | 1.621151  |
| Mo    | 1.884155  | 3.136110  | 1.627886  |
| Mo    | 1.870511  | 6.330521  | 1.615784  |
| Mo    | 4.639892  | -1.653252 | 1.561935  |
| Mo    | 4.647890  | 1.526776  | 1.564898  |
| Mo    | 4.629459  | 4.712690  | 1.560729  |
| Mo    | 7.373224  | -3.268734 | 1.496978  |
| Mo    | 7.428794  | -0.103801 | 1.476990  |
| Mo    | 7.413046  | 3.095209  | 1.530945  |
| Mo    | 10.156980 | -4.823413 | 1.597293  |
| Mo    | 9.918866  | -1.615841 | 1.529588  |
| Mo    | 10.181849 | 1.522378  | 1.514754  |
| Mo    | 12.926853 | -6.405527 | 1.650102  |
| Mo    | 12.934986 | -3.207207 | 1.677690  |
| Mo    | 12.928642 | -0.027225 | 1.654358  |
| S     | 0.943597  | 1.554002  | 0.072677  |
| S     | 0.916498  | 4.731261  | 0.082853  |
| S     | 0.923078  | 7.932755  | 0.072775  |
| S     | 3.692700  | -0.055710 | 0.023492  |
| S     | 3.687843  | 3.118598  | 0.020686  |
| S     | 3.684652  | 6.319486  | 0.019479  |
| S     | 6.441274  | -1.647516 | -0.058295 |
| S     | 6.467881  | 1.513781  | -0.037301 |
| S     | 6.450203  | 4.679648  | -0.031963 |
| S     | 9.240423  | -3.290907 | -0.050467 |
| S     | 9.236355  | -0.000189 | -0.072997 |
| S     | 9.289400  | 3.140672  | -0.001089 |
| S     | 12.041246 | -4.788772 | 0.098744  |
| S     | 11.932720 | -1.630853 | 0.166846  |
| S     | 12.064098 | 1.552993  | 0.057602  |
| S     | 0.973380  | 1.545973  | 3.199400  |
| S     | 0.996012  | 4.728264  | 3.199140  |
| S     | 0.981029  | 7.940323  | 3.186007  |
| S     | 3.754857  | -0.058760 | 3.145485  |
| S     | 3.759439  | 3.211702  | 3.148473  |
| S     | 3.746038  | 6.320684  | 3.139893  |
| S     | 6.543205  | -1.655696 | 3.082245  |
| S     | 6.558561  | 1.469340  | 3.079011  |
| S     | 6.486742  | 4.701108  | 3.082085  |
| S     | 9.120081  | -3.236289 | 3.119711  |
| S     | 11.971401 | -4.803228 | 3.198820  |
| S     | 11.958498 | 1.554666  | 3.175844  |
| S     | 9.232242  | 3.056801  | 3.110044  |
| S     | 11.145003 | -1.317903 | 3.223505  |
| O     | 12.405963 | -1.667738 | 3.192018  |
| O     | 10.779271 | -0.930525 | 4.444834  |
| H     | 9.837972  | -0.648354 | 4.393313  |

|      |           |           |           |
|------|-----------|-----------|-----------|
| CHO* |           |           |           |
| Mo   | 1.819723  | -0.016632 | 1.578047  |
| Mo   | 1.820861  | 3.186878  | 1.566289  |
| Mo   | 1.798054  | 6.372782  | 1.538774  |
| Mo   | 4.608481  | -1.591481 | 1.585313  |
| Mo   | 4.587029  | 1.597868  | 1.577705  |
| Mo   | 4.592355  | 4.788951  | 1.568749  |
| Mo   | 7.386739  | -3.177260 | 1.560807  |
| Mo   | 7.387594  | 0.041707  | 1.573783  |
| Mo   | 7.356610  | 3.195210  | 1.532782  |
| Mo   | 10.143839 | -4.801771 | 1.473893  |
| Mo   | 10.226418 | -1.674373 | 1.516970  |
| Mo   | 10.092672 | 1.575458  | 1.500181  |
| Mo   | 12.883067 | -6.402239 | 1.539525  |
| Mo   | 12.866503 | -3.177760 | 1.470990  |
| Mo   | 12.848384 | -0.060915 | 1.497335  |
| S    | 0.928722  | 1.577053  | 0.009037  |
| S    | 0.914878  | 4.760532  | -0.039138 |
| S    | 0.893112  | 7.979793  | -0.020521 |
| S    | 3.673158  | -0.008358 | 0.026658  |
| S    | 3.670919  | 3.188361  | 0.012628  |
| S    | 3.678652  | 6.390408  | 0.013669  |
| S    | 6.450621  | -1.573774 | 0.024603  |
| S    | 6.423866  | 1.589720  | 0.000434  |
| S    | 6.429486  | 4.808333  | -0.002826 |
| S    | 9.208014  | -3.181321 | -0.055944 |
| S    | 9.218232  | -0.073503 | 0.020193  |
| S    | 9.182097  | 3.165150  | -0.062121 |
| S    | 12.011035 | -4.809613 | -0.070487 |
| S    | 11.972538 | -1.618372 | -0.085871 |
| S    | 11.985333 | 1.563040  | -0.043064 |
| S    | 0.892308  | 1.585614  | 3.127560  |
| S    | 0.830636  | 4.814186  | 3.089269  |
| S    | 0.828971  | 7.917593  | 3.102834  |
| S    | 3.666553  | -0.007104 | 3.142971  |
| S    | 3.659494  | 3.201471  | 3.134009  |
| S    | 3.646767  | 6.377783  | 3.120704  |
| S    | 6.496543  | -1.574238 | 3.131508  |
| S    | 6.436340  | 1.624328  | 3.121454  |
| S    | 6.457807  | 4.789377  | 3.111628  |
| S    | 9.285368  | -3.258488 | 3.060014  |
| S    | 11.956211 | -4.742679 | 3.054354  |
| S    | 11.919635 | 1.512192  | 3.064561  |
| S    | 9.224892  | 3.197013  | 3.050636  |
| C    | 9.069621  | 0.356372  | 3.113415  |
| O    | 9.829853  | -0.687080 | 3.323333  |
| H    | 8.770225  | 0.847730  | 4.056959  |

|      |          |           |          |
|------|----------|-----------|----------|
| COH* |          |           |          |
| Mo   | 1.839405 | -0.020802 | 1.585808 |

|    |           |           |           |
|----|-----------|-----------|-----------|
| Mo | 1.841692  | 3.170223  | 1.597262  |
| Mo | 1.855939  | 6.355964  | 1.583134  |
| Mo | 4.631405  | -1.603399 | 1.583939  |
| Mo | 4.629205  | 1.574440  | 1.588681  |
| Mo | 4.629243  | 4.771363  | 1.588583  |
| Mo | 7.416755  | -3.164264 | 1.536209  |
| Mo | 7.421351  | -0.006052 | 1.493444  |
| Mo | 7.402730  | 3.157012  | 1.529957  |
| Mo | 10.150407 | -4.793378 | 1.548945  |
| Mo | 10.168575 | -1.563615 | 1.487365  |
| Mo | 10.125793 | 1.541566  | 1.460151  |
| Mo | 12.875000 | -6.410619 | 1.577188  |
| Mo | 12.882170 | -3.189830 | 1.537370  |
| Mo | 12.842429 | -0.035743 | 1.486107  |
| S  | 0.922296  | 1.577886  | 0.034324  |
| S  | 0.956885  | 4.764130  | 0.012600  |
| S  | 0.954085  | 7.949177  | 0.002051  |
| S  | 3.691793  | -0.012493 | 0.034294  |
| S  | 3.691896  | 3.169871  | 0.041273  |
| S  | 3.703931  | 6.363697  | 0.029828  |
| S  | 6.451437  | -1.586609 | -0.022922 |
| S  | 6.442790  | 1.564997  | -0.024626 |
| S  | 6.459822  | 4.782688  | 0.007252  |
| S  | 9.254789  | -3.174685 | -0.033381 |
| S  | 9.218710  | -0.021060 | -0.072643 |
| S  | 9.235920  | 3.186184  | -0.049405 |
| S  | 11.974479 | -4.822666 | -0.003519 |
| S  | 11.969813 | -1.632118 | -0.095445 |
| S  | 11.962230 | 1.609128  | -0.059480 |
| S  | 0.903342  | 1.564827  | 3.150225  |
| S  | 0.886034  | 4.782321  | 3.138979  |
| S  | 0.855345  | 7.938618  | 3.104959  |
| S  | 3.694489  | -0.019653 | 3.146869  |
| S  | 3.705959  | 3.172810  | 3.151689  |
| S  | 3.707099  | 6.366596  | 3.147106  |
| S  | 6.541595  | -1.566862 | 3.098309  |
| S  | 6.542546  | 1.550668  | 3.097964  |
| S  | 6.512812  | 4.777054  | 3.102821  |
| S  | 9.273339  | -3.100608 | 3.077252  |
| S  | 11.967357 | -4.770730 | 3.127882  |
| S  | 11.880464 | 1.470021  | 3.096747  |
| S  | 9.235616  | 3.105153  | 3.067586  |
| C  | 12.041003 | -1.631625 | 2.697417  |
| O  | 11.922156 | -1.606983 | 4.044868  |
| H  | 11.790943 | -0.678139 | 4.353523  |

|                    |           |           |           |
|--------------------|-----------|-----------|-----------|
| CH <sub>2</sub> O* |           |           |           |
| Mo                 | 1.863028  | 0.005476  | 1.578813  |
| Mo                 | 1.866399  | 3.181212  | 1.591564  |
| Mo                 | 1.866104  | 6.380343  | 1.569830  |
| Mo                 | 4.624914  | -1.595140 | 1.511937  |
| Mo                 | 4.635129  | 1.580007  | 1.523103  |
| Mo                 | 4.613929  | 4.763935  | 1.517768  |
| Mo                 | 7.347886  | -3.203946 | 1.470658  |
| Mo                 | 7.409883  | -0.013179 | 1.445076  |
| Mo                 | 7.398721  | 3.149436  | 1.503239  |
| Mo                 | 10.138373 | -4.774841 | 1.621963  |
| Mo                 | 9.956787  | -1.560724 | 1.578559  |
| Mo                 | 10.112448 | 1.547475  | 1.559146  |
| Mo                 | 12.891142 | -6.371911 | 1.648360  |
| Mo                 | 12.943608 | -3.152063 | 1.674903  |
| Mo                 | 12.923532 | -0.018958 | 1.631921  |
| S                  | 0.895265  | 1.601075  | 0.048106  |
| S                  | 0.898353  | 4.776757  | 0.049355  |
| S                  | 0.902809  | 7.980193  | 0.027356  |
| S                  | 3.673194  | 0.000955  | -0.023104 |
| S                  | 3.666371  | 3.168578  | -0.019958 |
| S                  | 3.676550  | 6.370815  | -0.029845 |
| S                  | 6.441298  | -1.580816 | -0.093112 |
| S                  | 6.461281  | 1.572103  | -0.078904 |
| S                  | 6.444328  | 4.737292  | -0.065841 |
| S                  | 9.247369  | -3.211289 | -0.012167 |
| S                  | 9.241062  | 0.021049  | -0.062616 |
| S                  | 9.296358  | 3.180447  | 0.007903  |
| S                  | 12.014766 | -4.742558 | 0.109810  |
| S                  | 11.898139 | -1.604295 | 0.154942  |
| S                  | 11.992410 | 1.595400  | 0.065120  |
| S                  | 0.958007  | 1.588432  | 3.168736  |
| S                  | 1.013974  | 4.781336  | 3.173151  |
| S                  | 0.990090  | 7.989977  | 3.149981  |
| S                  | 3.737413  | -0.007296 | 3.099306  |
| S                  | 3.744625  | 3.170905  | 3.107006  |
| S                  | 3.738175  | 6.376613  | 3.092627  |
| S                  | 6.513698  | -1.576489 | 3.038080  |
| S                  | 6.534050  | 1.536389  | 3.054594  |
| S                  | 6.461749  | 4.758649  | 3.049445  |
| S                  | 9.067553  | -3.172836 | 3.100822  |
| S                  | 11.969892 | -4.751289 | 3.206132  |
| S                  | 11.924809 | 1.544034  | 3.155932  |
| S                  | 9.184506  | 3.117452  | 3.121884  |
| C                  | 11.161106 | -1.537126 | 3.455328  |
| O                  | 12.514777 | -1.545529 | 3.053510  |
| H                  | 11.025493 | -2.383021 | 4.146645  |
| H                  | 10.921390 | -0.610719 | 4.004407  |

|       |           |           |          |
|-------|-----------|-----------|----------|
| CHOH* |           |           |          |
| Mo    | 1.838437  | 0.031041  | 1.583115 |
| Mo    | 1.837142  | 3.222444  | 1.589426 |
| Mo    | 1.852192  | 6.418537  | 1.576139 |
| Mo    | 4.634195  | -1.559403 | 1.570311 |
| Mo    | 4.626153  | 1.615265  | 1.572128 |
| Mo    | 4.622731  | 4.811193  | 1.571594 |
| Mo    | 7.409541  | -3.134535 | 1.518069 |
| Mo    | 7.429931  | 0.016310  | 1.484630 |
| Mo    | 7.404192  | 3.185051  | 1.517469 |
| Mo    | 10.132052 | -4.754350 | 1.525851 |
| Mo    | 10.141892 | -1.563056 | 1.430067 |

|    |           |           |           |
|----|-----------|-----------|-----------|
| Mo | 10.138107 | 1.566668  | 1.474511  |
| Mo | 12.874375 | -6.342851 | 1.568617  |
| Mo | 12.839221 | -3.106766 | 1.537138  |
| Mo | 12.869923 | 0.023338  | 1.499619  |
| S  | 0.921824  | 1.633289  | 0.027046  |
| S  | 0.928438  | 4.821702  | 0.020267  |
| S  | 0.950289  | 8.003931  | 0.001883  |
| S  | 3.684895  | 0.030014  | 0.022769  |
| S  | 3.681089  | 3.214108  | 0.026198  |
| S  | 3.698173  | 6.409554  | 0.016870  |
| S  | 6.452025  | -1.543163 | -0.040619 |
| S  | 6.446516  | 1.593115  | -0.034829 |
| S  | 6.453997  | 4.807207  | -0.008258 |
| S  | 9.227468  | -3.173367 | -0.082857 |
| S  | 9.225665  | 0.021563  | -0.095338 |
| S  | 9.243261  | 3.194265  | -0.052666 |
| S  | 11.980408 | -4.747463 | -0.004723 |
| S  | 11.976557 | -1.559731 | -0.095122 |
| S  | 11.969361 | 1.656212  | -0.045028 |
| S  | 0.902209  | 1.623334  | 3.143371  |
| S  | 0.878554  | 4.840878  | 3.121203  |
| S  | 0.871865  | 7.996912  | 3.115151  |
| S  | 3.699052  | 0.026138  | 3.135281  |
| S  | 3.706486  | 3.216322  | 3.136841  |
| S  | 3.711134  | 6.413709  | 3.131731  |
| S  | 6.545566  | -1.536274 | 3.085724  |
| S  | 6.540709  | 1.580287  | 3.079907  |
| S  | 6.506149  | 4.811034  | 3.083122  |
| S  | 9.249391  | -3.084679 | 3.058207  |
| S  | 11.942086 | -4.714077 | 3.111371  |
| S  | 11.917183 | 1.558725  | 3.094065  |
| S  | 9.234781  | 3.142657  | 3.061594  |
| C  | 12.006909 | -1.523663 | 2.869936  |
| O  | 12.163240 | -1.631162 | 4.238792  |
| H  | 12.907186 | -2.243890 | 4.426702  |

|       |           |           |           |
|-------|-----------|-----------|-----------|
| S     | 3.654585  | 3.145016  | -0.031486 |
| S     | 3.652821  | 6.351084  | -0.033792 |
| S     | 6.425754  | -1.609674 | -0.090296 |
| S     | 6.461166  | 1.538955  | -0.075395 |
| S     | 6.424325  | 4.706283  | -0.078210 |
| S     | 9.230065  | -3.218766 | 0.002628  |
| S     | 9.242758  | -0.017708 | -0.041306 |
| S     | 9.268976  | 3.177686  | -0.015990 |
| S     | 12.000187 | -4.749174 | 0.095614  |
| S     | 11.863235 | -1.590387 | 0.241099  |
| S     | 12.024889 | 1.606922  | 0.032033  |
| S     | 0.959081  | 1.577070  | 3.162185  |
| S     | 0.992453  | 4.762000  | 3.167770  |
| S     | 0.983466  | 7.988551  | 3.142090  |
| S     | 3.737340  | -0.022206 | 3.094748  |
| S     | 3.739780  | 3.147308  | 3.098487  |
| S     | 3.719644  | 6.351229  | 3.084880  |
| S     | 6.491638  | -1.619993 | 3.049062  |
| S     | 6.525346  | 1.506720  | 3.048998  |
| S     | 6.431066  | 4.718842  | 3.044449  |
| S     | 9.002363  | -3.247456 | 3.125711  |
| S     | 11.943301 | -4.773999 | 3.197661  |
| S     | 11.917415 | 1.574224  | 3.158610  |
| S     | 9.182484  | 3.082016  | 3.102817  |
| C     | 10.982569 | -1.502925 | 3.575980  |
| O     | 12.411633 | -1.535827 | 3.188492  |
| H     | 10.787069 | -0.552679 | 4.093243  |
| H     | 10.866373 | -2.328386 | 4.290249  |
| H     | 13.035893 | -1.512150 | 3.956325  |
| <hr/> |           |           |           |
| <hr/> |           |           |           |
| CH*   |           |           |           |
| <hr/> |           |           |           |
| Mo    | 1.822237  | -0.004565 | 1.600484  |
| Mo    | 1.830267  | 3.193628  | 1.603561  |
| Mo    | 1.841823  | 6.379866  | 1.584189  |
| Mo    | 4.619993  | -1.579596 | 1.602014  |
| Mo    | 4.611669  | 1.603602  | 1.606452  |
| Mo    | 4.619408  | 4.797700  | 1.600526  |
| Mo    | 7.411370  | -3.137538 | 1.550956  |
| Mo    | 7.393137  | 0.021685  | 1.514077  |
| Mo    | 7.394070  | 3.179677  | 1.548670  |
| Mo    | 10.129758 | -4.778688 | 1.572276  |
| Mo    | 10.189689 | -1.582605 | 1.488632  |
| Mo    | 10.124214 | 1.588309  | 1.486198  |
| Mo    | 12.869515 | -6.388978 | 1.586230  |
| Mo    | 12.881116 | -3.150649 | 1.526647  |
| Mo    | 12.826783 | -0.034329 | 1.486448  |
| S     | 0.913614  | 1.595104  | 0.045848  |
| S     | 0.951444  | 4.782919  | 0.010110  |
| S     | 0.937775  | 7.973036  | 0.007310  |
| S     | 3.675774  | 0.010242  | 0.052653  |
| S     | 3.682190  | 3.196692  | 0.052209  |
| S     | 3.698822  | 6.391976  | 0.039992  |
| S     | 6.437837  | -1.560659 | -0.006012 |
| S     | 6.425717  | 1.592411  | -0.007788 |
| S     | 6.454466  | 4.807937  | 0.024095  |
| S     | 9.240509  | -3.181569 | -0.029153 |
| S     | 9.212947  | 0.007546  | -0.026264 |
| S     | 9.228838  | 3.207622  | -0.032808 |
| S     | 11.965844 | -4.802705 | 0.011682  |
| S     | 11.965253 | -1.617848 | -0.127309 |
| S     | 11.954410 | 1.628708  | -0.045023 |
| S     | 0.892870  | 1.588194  | 3.160369  |
| S     | 0.870526  | 4.813142  | 3.139144  |
| S     | 0.821457  | 7.934399  | 3.114584  |
| S     | 3.674372  | 0.003802  | 3.161908  |
| S     | 3.687661  | 3.205073  | 3.164353  |
| S     | 3.688419  | 6.390537  | 3.155881  |
| S     | 6.528457  | -1.543200 | 3.115084  |
| S     | 6.515933  | 1.580163  | 3.116232  |
| S     | 6.503883  | 4.805804  | 3.118416  |
| S     | 9.277493  | -3.081737 | 3.095742  |
| S     | 11.970017 | -4.737475 | 3.123068  |
| S     | 11.888516 | 1.494767  | 3.098801  |
| S     | 9.224550  | 3.132510  | 3.094700  |
| C     | 11.952307 | -1.605959 | 2.640051  |

|                   |           |           |           |
|-------------------|-----------|-----------|-----------|
| H                 | 11.900911 | -1.597145 | 3.737300  |
| <hr/>             |           |           |           |
| <hr/>             |           |           |           |
| CH <sub>2</sub> * |           |           |           |
| <hr/>             |           |           |           |
| Mo                | 1.833027  | 0.007820  | 1.603467  |
| Mo                | 1.834583  | 3.206320  | 1.608597  |
| Mo                | 1.812564  | 6.393774  | 1.571257  |
| Mo                | 4.618734  | -1.574634 | 1.598161  |
| Mo                | 4.617233  | 1.601963  | 1.602445  |
| Mo                | 4.611351  | 4.800258  | 1.598360  |
| Mo                | 7.389457  | -3.168356 | 1.559143  |
| Mo                | 7.439348  | -0.003434 | 1.541456  |
| Mo                | 7.381271  | 3.204734  | 1.561953  |
| Mo                | 10.161614 | -4.736856 | 1.529626  |
| Mo                | 10.155677 | -1.536258 | 1.477661  |
| Mo                | 10.155547 | 1.574975  | 1.480870  |
| Mo                | 12.889585 | -6.370222 | 1.580587  |
| Mo                | 12.868387 | -3.139073 | 1.525810  |
| Mo                | 12.850392 | -0.016377 | 1.503808  |
| S                 | 0.935473  | 1.609297  | 0.047151  |
| S                 | 0.914685  | 4.780560  | 0.008124  |
| S                 | 0.915243  | 8.000691  | 0.000646  |
| S                 | 3.683594  | -0.015776 | 0.046734  |
| S                 | 3.683354  | 3.198862  | 0.050248  |
| S                 | 3.687765  | 6.396846  | 0.038937  |
| S                 | 6.449277  | -1.580257 | 0.015274  |
| S                 | 6.446939  | 1.602438  | 0.017621  |
| S                 | 6.438828  | 4.799756  | 0.015351  |
| S                 | 9.217687  | -3.147353 | -0.038996 |
| S                 | 9.218606  | -0.002692 | -0.099165 |
| S                 | 9.206994  | 3.225227  | -0.022661 |
| S                 | 12.015482 | -4.760745 | -0.015837 |
| S                 | 11.971819 | -1.586396 | -0.054963 |
| S                 | 12.024352 | 1.607602  | -0.042198 |
| S                 | 9.005220  | 1.603107  | 3.165345  |
| S                 | 0.851170  | 4.839119  | 3.127941  |
| S                 | 0.832416  | 7.947472  | 3.118271  |
| S                 | 3.687599  | 0.007325  | 3.165698  |
| S                 | 3.692481  | 3.206490  | 3.164806  |
| S                 | 3.668708  | 6.398447  | 3.145228  |
| S                 | 6.509655  | -1.566114 | 3.132493  |
| S                 | 6.507852  | 1.585645  | 3.125148  |
| S                 | 6.481803  | 4.802713  | 3.134425  |
| S                 | 9.284834  | -3.120766 | 3.076372  |
| S                 | 11.962706 | -4.790989 | 3.108481  |
| S                 | 11.920990 | 1.522176  | 3.098815  |
| S                 | 9.257817  | 3.182516  | 3.070345  |
| C                 | 9.259276  | 0.101347  | 2.782792  |
| H                 | 8.960500  | 0.038165  | 3.786804  |
| H                 | 10.026941 | -0.676637 | 3.199807  |
| <hr/>             |           |           |           |
| <hr/>             |           |           |           |
| CH <sub>3</sub> * |           |           |           |
| <hr/>             |           |           |           |
| Mo                | 1.844115  | 0.005309  | 1.588650  |
| Mo                | 1.856514  | 3.210562  | 1.586926  |
| Mo                | 1.838460  | 6.392026  | 1.550657  |
| Mo                | 4.621987  | -1.574043 | 1.581961  |
| Mo                | 4.629632  | 1.603561  | 1.599029  |
| Mo                | 4.627632  | 4.798914  | 1.578850  |
| Mo                | 7.398775  | -3.162399 | 1.547885  |
| Mo                | 7.434301  | 0.016503  | 1.577902  |
| Mo                | 7.399251  | 3.208169  | 1.566016  |
| Mo                | 10.178471 | -4.737729 | 1.544624  |
| Mo                | 10.141176 | -1.521224 | 1.487402  |
| Mo                | 10.131776 | 1.591771  | 1.570820  |
| Mo                | 12.908050 | -6.358439 | 1.578536  |
| Mo                | 12.930738 | -3.124562 | 1.509351  |
| Mo                | 12.893404 | -0.048990 | 1.518870  |
| S                 | 0.938644  | 1.606902  | 0.033976  |
| S                 | 0.945094  | 4.779712  | -0.020013 |
| S                 | 0.921580  | 8.002214  | -0.012886 |
| S                 | 3.694243  | 0.020413  | 0.032742  |
| S                 | 3.705604  | 3.193016  | 0.031765  |
| S                 | 3.708196  | 6.396180  | 0.015023  |
| S                 | 6.468650  | -1.557458 | 0.018949  |
| S                 | 6.470323  | 1.591727  | 0.030346  |

|                   |           |           |           |
|-------------------|-----------|-----------|-----------|
| S                 | 6.464428  | 4.797190  | 0.005353  |
| S                 | 9.241236  | -3.151329 | -0.033881 |
| S                 | 9.212569  | 0.044784  | -0.032982 |
| S                 | 9.247215  | 3.202878  | 0.006343  |
| S                 | 12.018464 | -4.763218 | -0.014556 |
| S                 | 11.968646 | -1.586636 | -0.038910 |
| S                 | 11.982487 | 1.607919  | 0.007556  |
| S                 | 0.930925  | 1.612411  | 3.147630  |
| S                 | 0.891381  | 4.847589  | 3.125568  |
| S                 | 0.871174  | 7.931200  | 3.121390  |
| S                 | 3.690705  | 0.005636  | 3.152162  |
| S                 | 3.703186  | 3.212228  | 3.148956  |
| S                 | 3.682216  | 6.394142  | 3.125665  |
| S                 | 6.479787  | -1.586481 | 3.125357  |
| S                 | 6.505207  | 1.606959  | 3.140991  |
| S                 | 6.486702  | 4.812721  | 3.122742  |
| S                 | 9.284841  | -3.122140 | 3.072583  |
| S                 | 12.005047 | -4.682913 | 3.102299  |
| S                 | 12.002253 | 1.533283  | 3.102849  |
| S                 | 9.246622  | 3.250496  | 3.107824  |
| C                 | 9.258075  | -0.053347 | 3.036204  |
| H                 | 9.697673  | 0.920735  | 3.425896  |
| H                 | 8.590282  | -0.265645 | 3.886434  |
| H                 | 10.157703 | -0.747900 | 3.295615  |
| <hr/>             |           |           |           |
| <hr/>             |           |           |           |
| CH <sub>4</sub> * |           |           |           |
| <hr/>             |           |           |           |
| Mo                | 1.894328  | -0.004260 | 1.409264  |
| Mo                | 1.903023  | 3.193544  | 1.416706  |
| Mo                | 1.886043  | 6.383198  | 1.367636  |
| Mo                | 4.695864  | -1.576528 | 1.387086  |
| Mo                | 4.692475  | 1.598611  | 1.395047  |
| Mo                | 4.692230  | 4.798948  | 1.382637  |
| Mo                | 7.493112  | -3.125544 | 1.322665  |
| Mo                | 7.505774  | 0.029992  | 1.285538  |
| Mo                | 7.473055  | 3.197328  | 1.311389  |
| Mo                | 10.237235 | -4.731237 | 1.319029  |
| Mo                | 10.248802 | -1.521095 | 1.220725  |
| Mo                | 10.185048 | 1.544336  | 1.238648  |
| Mo                | 12.938584 | -6.398104 | 1.394179  |
| Mo                | 12.947703 | -3.147193 | 1.319186  |
| Mo                | 12.903168 | -0.053130 | 1.271090  |
| S                 | 0.987359  | 1.595090  | -0.134645 |
| S                 | 0.993423  | 4.762015  | -0.190203 |
| S                 | 0.990780  | 7.990497  | -0.206081 |
| S                 | 3.742553  | 0.010276  | -0.149586 |
| S                 | 3.745835  | 3.190018  | -0.151244 |
| S                 | 3.758497  | 6.393852  | -0.170232 |
| S                 | 6.516448  | -1.549446 | -0.222539 |
| S                 | 6.501576  | 1.593205  | -0.226411 |
| S                 | 6.521461  | 4.821926  | -0.206486 |
| S                 | 9.326536  | -3.127181 | -0.274774 |
| S                 | 9.277004  | -0.004920 | -0.318625 |
| S                 | 9.314686  | 3.220661  | -0.262648 |
| S                 | 12.093870 | -4.787055 | -0.204051 |
| S                 | 12.054459 | -1.622583 | -0.297029 |
| S                 | 12.061863 | 1.605570  | -0.254853 |
| S                 | 0.961228  | 1.585502  | 2.974820  |
| S                 | 0.923952  | 4.833655  | 2.931505  |
| S                 | 0.876669  | 7.926117  | 2.906618  |
| S                 | 3.762393  | 0.001865  | 2.959136  |
| S                 | 3.779425  | 3.203555  | 2.957829  |
| S                 | 3.752079  | 6.389369  | 2.933453  |
| S                 | 6.623890  | -1.534332 | 2.890480  |
| S                 | 6.624418  | 1.590549  | 2.888933  |
| S                 | 6.588477  | 4.815762  | 2.885595  |
| S                 | 9.391835  | -3.020683 | 2.843981  |
| S                 | 12.025739 | -4.715276 | 2.909254  |
| S                 | 11.905823 | 1.408959  | 2.875149  |
| S                 | 9.317590  | 3.145948  | 2.836956  |
| C                 | 11.415011 | -1.486328 | 6.092566  |
| H                 | 10.653797 | -1.022440 | 5.452913  |
| H                 | 10.981382 | -1.707338 | 7.076054  |
| H                 | 12.261853 | -0.798939 | 6.210198  |
| H                 | 11.762862 | -2.417315 | 5.628308  |

## 2. Adsorption of species on Cu/MoS<sub>2-v</sub>(001)

|                   |           |           |            |
|-------------------|-----------|-----------|------------|
| <hr/>             |           |           |            |
| <hr/>             |           |           |            |
| H <sub>2</sub> O* |           |           |            |
| <hr/>             |           |           |            |
| Mo                | 1.803835  | 0.036409  | 1.599474   |
| Mo                | 1.816863  | 3.226983  | 1.594258   |
| Mo                | 1.799184  | 6.414314  | 1.544264   |
| Mo                | 4.558066  | -1.552740 | 1.607676   |
| Mo                | 4.567374  | 1.641221  | 1.624592   |
| Mo                | 4.574199  | 4.807835  | 1.596028   |
| Mo                | 7.287724  | -3.129884 | 1.547346   |
| Mo                | 7.271910  | 0.031828  | 1.606410   |
| Mo                | 7.350313  | 3.209703  | 1.589094   |
| Mo                | 10.098485 | -4.737904 | 1.512210   |
| Mo                | 10.126140 | 1.626267  | 1.553814   |
| Mo                | 12.854184 | -6.337196 | 1.575586</ |

|   |           |           |           |
|---|-----------|-----------|-----------|
| S | 9.249696  | -0.109905 | 0.213312  |
| S | 9.188359  | 3.184766  | -0.044316 |
| S | 11.942069 | -4.791228 | 0.004342  |
| S | 12.106287 | -1.599789 | -0.105836 |
| S | 11.949819 | 1.616699  | -0.008961 |
| S | 0.871271  | 1.600266  | 3.170207  |
| S | 0.888695  | 4.794032  | 3.151957  |
| S | 0.882406  | 7.987042  | 3.148817  |
| S | 3.665135  | 0.007974  | 3.164616  |
| S | 3.673888  | 3.198554  | 3.173079  |
| S | 3.685018  | 6.384709  | 3.169505  |
| S | 6.489590  | -1.544271 | 3.108422  |
| S | 6.483217  | 1.584165  | 3.134056  |
| S | 6.467193  | 4.806867  | 3.102671  |
| S | 9.267569  | -2.988723 | 2.932305  |
| S | 11.924507 | -4.711487 | 3.102715  |
| S | 11.870054 | 1.541275  | 3.114645  |
| S | 9.184198  | 3.177038  | 3.109138  |
| C | 12.327807 | -1.539334 | 3.001582  |
| O | 11.988885 | -1.575534 | 4.137951  |

|     |           |           |           |
|-----|-----------|-----------|-----------|
| OH* |           |           |           |
| Mo  | 1.831061  | -0.017612 | 1.649109  |
| Mo  | 1.836495  | 3.169955  | 1.654922  |
| Mo  | 1.839977  | 6.362757  | 1.633382  |
| Mo  | 4.614836  | -1.585596 | 1.574937  |
| Mo  | 4.595176  | 1.607319  | 1.589300  |
| Mo  | 4.597797  | 4.793581  | 1.583979  |
| Mo  | 7.389885  | -3.176142 | 1.461424  |
| Mo  | 7.345544  | 0.126337  | 1.381677  |
| Mo  | 7.365017  | 3.209353  | 1.483755  |
| Mo  | 10.171905 | -4.804534 | 1.542037  |
| Mo  | 10.019934 | 1.629562  | 1.437862  |
| Mo  | 12.871045 | -6.432478 | 1.643422  |
| Mo  | 12.907553 | -3.240299 | 1.644165  |
| Mo  | 12.872046 | -0.092580 | 1.606163  |
| Cu  | 9.744005  | -1.496436 | 1.156205  |
| S   | 9.008865  | 1.566210  | 0.096161  |
| S   | 9.012166  | 4.749989  | 0.084208  |
| S   | 9.002501  | 7.956379  | 0.079782  |
| S   | 3.643242  | -0.001682 | 0.053669  |
| S   | 3.632469  | 3.193108  | 0.052213  |
| S   | 3.654343  | 6.383688  | 0.039767  |
| S   | 6.402294  | -1.580428 | -0.066305 |
| S   | 6.334378  | 1.656864  | -0.087549 |
| S   | 6.387993  | 4.798346  | -0.045080 |
| S   | 9.161606  | -3.295896 | -0.175812 |
| S   | 9.102198  | 0.154162  | -0.171468 |
| S   | 9.234528  | 3.250059  | -0.092075 |
| S   | 12.037037 | -4.824850 | 0.060576  |
| S   | 11.847748 | -1.661625 | 0.154445  |
| S   | 11.989094 | 1.536854  | 0.034964  |
| S   | 9.002745  | 1.561713  | 3.216145  |
| S   | 9.030159  | 4.767616  | 3.216029  |
| S   | 0.888568  | 7.943800  | 3.191345  |
| S   | 3.720165  | -0.005764 | 3.166778  |
| S   | 3.715927  | 3.193913  | 3.175893  |
| S   | 3.720760  | 6.390520  | 3.163748  |
| S   | 6.579520  | -1.502135 | 3.018815  |
| S   | 6.530824  | 1.608843  | 3.069387  |
| S   | 6.503515  | 4.823209  | 3.064905  |
| S   | 9.327866  | -2.952285 | 2.886348  |
| S   | 11.934881 | -4.814746 | 3.184892  |
| S   | 11.786176 | 1.463587  | 3.103506  |
| S   | 9.169149  | 3.161056  | 3.067793  |
| O   | 12.150636 | -1.651806 | 2.881058  |
| H   | 12.505835 | -1.640521 | 3.792494  |

|    |           |           |           |
|----|-----------|-----------|-----------|
| H* |           |           |           |
| Mo | 1.822903  | -0.026531 | 1.648272  |
| Mo | 1.827186  | 3.171787  | 1.660064  |
| Mo | 1.838055  | 6.361875  | 1.622095  |
| Mo | 4.618956  | -1.586625 | 1.590786  |
| Mo | 4.594767  | 1.609515  | 1.611730  |
| Mo | 4.603260  | 4.795513  | 1.603637  |
| Mo | 7.401207  | -3.172151 | 1.490658  |
| Mo | 7.349353  | 0.127895  | 1.404594  |
| Mo | 7.371034  | 3.210271  | 1.512738  |
| Mo | 10.182440 | -4.806291 | 1.541014  |
| Mo | 10.031335 | 1.625728  | 1.442945  |
| Mo | 12.869522 | -6.436284 | 1.623445  |
| Mo | 12.904547 | -3.219646 | 1.590517  |
| Mo | 12.889582 | -0.113929 | 1.545536  |
| Cu | 9.820627  | -1.512412 | 1.182540  |
| S  | 9.012942  | 1.565963  | 0.094353  |
| S  | 9.021570  | 4.744731  | 0.069394  |
| S  | 9.024030  | 7.952221  | 0.052795  |
| S  | 3.652445  | 0.001336  | 0.068180  |
| S  | 3.639702  | 3.194789  | 0.072124  |
| S  | 3.672641  | 6.382188  | 0.048335  |
| S  | 6.416347  | -1.585924 | -0.040618 |
| S  | 6.338053  | 1.661078  | -0.058266 |
| S  | 6.402025  | 4.801613  | -0.016739 |
| S  | 9.169622  | -3.290308 | -0.156244 |
| S  | 9.102435  | 0.132037  | -0.140962 |
| S  | 9.224428  | 3.246549  | -0.079865 |
| S  | 12.024065 | -4.838283 | 0.033435  |
| S  | 11.861599 | -1.665671 | 0.103066  |
| S  | 11.969091 | 1.550611  | 0.002600  |
| S  | 0.888843  | 1.554331  | 3.211128  |
| S  | 0.897104  | 4.786866  | 3.201355  |
| S  | 0.861870  | 7.922112  | 3.180076  |
| S  | 3.704356  | -0.011925 | 3.177354  |
| S  | 3.702827  | 3.198340  | 3.192036  |
| S  | 3.708091  | 6.392076  | 3.172082  |
| S  | 6.581808  | -1.500912 | 3.041967  |
| S  | 6.531461  | 1.610433  | 3.098483  |

|   |           |           |          |
|---|-----------|-----------|----------|
| S | 6.509733  | 4.826893  | 3.091069 |
| S | 9.359379  | -2.949093 | 2.911479 |
| S | 11.958112 | -4.784293 | 3.162503 |
| S | 11.808098 | 1.418907  | 3.078375 |
| S | 9.192527  | 3.157787  | 3.079870 |
| H | 12.580399 | -1.608264 | 2.634365 |

|    |           |           |           |
|----|-----------|-----------|-----------|
| O* |           |           |           |
| Mo | 1.824648  | 0.027883  | 1.594641  |
| Mo | 1.828286  | 3.200029  | 1.605143  |
| Mo | 1.840788  | 6.396602  | 1.566994  |
| Mo | 4.579068  | -1.577646 | 1.596481  |
| Mo | 4.590992  | 1.610942  | 1.614397  |
| Mo | 4.584917  | 4.783988  | 1.596221  |
| Mo | 7.289231  | -3.171467 | 1.525354  |
| Mo | 7.301330  | 0.003176  | 1.526766  |
| Mo | 7.368761  | 3.163321  | 1.566468  |
| Mo | 10.058970 | -4.783721 | 1.563250  |
| Mo | 10.142092 | 1.630839  | 1.503236  |
| Mo | 12.873637 | -6.349383 | 1.584382  |
| Mo | 12.933293 | -3.064950 | 1.513346  |
| Mo | 12.894448 | 0.007605  | 1.469566  |
| Cu | 10.402202 | -1.965242 | 1.326041  |
| S  | 9.005526  | 1.624165  | 0.034495  |
| S  | 9.065609  | 4.777384  | -0.000828 |
| S  | 9.061658  | 8.018009  | -0.012753 |
| S  | 3.665049  | 0.026888  | 0.045338  |
| S  | 3.666353  | 3.190190  | 0.044306  |
| S  | 3.684638  | 6.390036  | 0.023542  |
| S  | 6.378494  | -1.586810 | -0.014394 |
| S  | 6.403630  | 1.576392  | 0.004450  |
| S  | 6.396363  | 4.752190  | 0.006020  |
| S  | 9.105099  | -3.285550 | -0.063728 |
| S  | 9.294153  | -0.183295 | 0.344125  |
| S  | 9.209426  | 3.171495  | -0.026022 |
| S  | 11.964377 | -4.738484 | 0.028262  |
| S  | 12.131671 | -1.577633 | -0.213768 |
| S  | 11.999772 | 1.639106  | -0.031735 |
| S  | 0.882526  | 1.612033  | 3.163446  |
| S  | 0.891582  | 4.833265  | 3.136705  |
| S  | 0.857113  | 7.978739  | 3.110287  |
| S  | 3.656130  | 0.012622  | 3.167049  |
| S  | 3.668734  | 3.203753  | 3.175747  |
| S  | 3.662086  | 6.390633  | 3.153459  |
| S  | 6.463211  | -1.560808 | 3.131502  |
| S  | 6.479538  | 1.578631  | 3.143930  |
| S  | 6.456168  | 4.786885  | 3.124031  |
| S  | 9.219389  | -3.087319 | 3.020258  |
| S  | 11.945035 | -4.669894 | 3.094508  |
| S  | 11.914460 | 1.535686  | 3.099504  |
| S  | 9.204611  | 3.141396  | 3.120678  |
| O  | 12.095317 | -1.566780 | 2.543603  |

|                   |           |           |           |
|-------------------|-----------|-----------|-----------|
| CO <sub>2</sub> * |           |           |           |
| Mo                | 1.756294  | 0.070520  | 1.575024  |
| Mo                | 1.762129  | 3.264390  | 1.582238  |
| Mo                | 1.741365  | 6.452236  | 1.539832  |
| Mo                | 4.520132  | -1.518712 | 1.563637  |
| Mo                | 4.524443  | 1.674896  | 1.581456  |
| Mo                | 4.520413  | 4.852351  | 1.564570  |
| Mo                | 7.267879  | -3.108707 | 1.483654  |
| Mo                | 7.240690  | 0.101005  | 1.456157  |
| Mo                | 7.304636  | 3.236039  | 1.512186  |
| Mo                | 10.043535 | -4.732789 | 1.480805  |
| Mo                | 10.072049 | 1.696201  | 1.413572  |
| Mo                | 12.805031 | -6.312355 | 1.541793  |
| Mo                | 12.868848 | -3.110137 | 1.434553  |
| Mo                | 12.833417 | 0.087880  | 1.412625  |
| Cu                | 10.231146 | -1.835135 | 1.347251  |
| S                 | 0.849108  | 1.669858  | 0.015966  |
| S                 | 0.892950  | 4.820291  | -0.049446 |
| S                 | 0.883057  | 8.078207  | -0.055191 |
| S                 | 3.595788  | 0.080420  | 0.020289  |
| S                 | 3.595434  | 3.255375  | 0.017611  |
| S                 | 3.603399  | 6.453185  | 0.000806  |
| S                 | 6.323173  | -1.530944 | -0.049917 |
| S                 | 6.316523  | 1.659922  | -0.051414 |
| S                 | 6.332795  | 4.833649  | -0.030243 |
| S                 | 9.049866  | -3.230216 | -0.150431 |
| S                 | 9.191601  | -0.075188 | 0.208148  |
| S                 | 9.132749  | 3.254683  | -0.100373 |
| S                 | 11.908703 | -4.738350 | -0.055808 |
| S                 | 11.932464 | -1.532708 | -0.032014 |
| S                 | 11.928371 | 1.703024  | -0.101133 |
| S                 | 0.814455  | 1.661941  | 3.131351  |
| S                 | 0.784817  | 4.898036  | 3.100901  |
| S                 | 0.755964  | 8.011984  | 3.082482  |
| S                 | 3.600494  | 0.068169  | 3.136693  |
| S                 | 3.608130  | 3.269809  | 3.146341  |
| S                 | 3.586396  | 6.453211  | 3.116070  |
| S                 | 6.429274  | -1.481578 | 3.074987  |
| S                 | 6.425429  | 1.654018  | 3.096620  |
| S                 | 6.407610  | 4.859451  | 3.076445  |
| S                 | 9.214951  | -2.997777 | 2.979815  |
| S                 | 11.883887 | -4.633917 | 3.049139  |
| S                 | 11.823341 | 1.554374  | 3.048614  |
| S                 | 9.161632  | 3.213619  | 3.039688  |
| C                 | 9.204390  | -0.462006 | 6.077656  |
| O                 | 9.114663  | 0.155707  | 5.079389  |
| O                 | 9.294531  | -1.076590 | 7.075489  |

|       |          |           |          |
|-------|----------|-----------|----------|
| HCOO* |          |           |          |
| Mo    | 1.794610 | 0.008354  | 1.576230 |
| Mo    | 1.814835 | 3.204331  | 1.566536 |
| Mo    | 1.800360 | 6.391173  | 1.514329 |
| Mo    | 4.564095 | -1.563006 | 1.597218 |
| Mo    | 4.559516 | 1.620812  | 1.612664 |

|    |           |           |           |
|----|-----------|-----------|-----------|
| Mo | 4.577132  | 4.797002  | 1.581714  |
| Mo | 7.304142  | -3.134862 | 1.562923  |
| Mo | 7.298349  | 0.028089  | 1.642431  |
| Mo | 7.341888  | 3.209144  | 1.593253  |
| Mo | 10.088940 | -4.761822 | 1.488622  |
| Mo | 10.074466 | 1.582138  | 1.599509  |
| Mo | 12.838235 | -6.370927 | 1.536988  |
| Mo | 12.962711 | -3.145669 | 1.382423  |
| Mo | 12.920421 | -0.026337 | 1.436964  |
| Cu | 10.352656 | -1.888737 | 1.186960  |
| S  | 0.881062  | 1.601501  | 0.010452  |
| S  | 0.985175  | 4.750110  | -0.090463 |
| S  | 0.927665  | 8.027964  | -0.064646 |
| S  | 3.651752  | 0.031806  | 0.036621  |
| S  | 3.671973  | 3.193896  | 0.024081  |
| S  | 3.687254  | 6.404773  | 0.007860  |
| S  | 6.405593  | -1.533743 | 0.042980  |
| S  | 6.407690  | 1.591602  | 0.060012  |
| S  | 6.417217  | 4.801352  | 0.019343  |
| S  | 9.090923  | -3.304160 | -0.161308 |
| S  | 9.207763  | -0.123874 | 0.190541  |
| S  | 9.167104  | 3.138340  | 0.012789  |
| S  | 11.935367 | -4.800670 | -0.072591 |
| S  | 12.092494 | -1.597771 | -0.141091 |
| S  | 11.887186 | 1.595200  | -0.017155 |
| S  | 0.850752  | 1.613414  | 3.121241  |
| S  | 0.837456  | 4.848221  | 3.077210  |
| S  | 0.833967  | 7.922922  | 3.093617  |
| S  | 3.615304  | 0.017198  | 3.161223  |
| S  | 3.630583  | 3.224923  | 3.156290  |
| S  | 3.614010  | 6.391481  | 3.118871  |
| S  | 6.398600  | -1.589503 | 3.171695  |
| S  | 6.391806  | 1.645811  | 3.182346  |
| S  | 6.432963  | 4.828631  | 3.138589  |
| S  | 9.329840  | -2.967593 | 2.916792  |
| S  | 11.959131 | -0.648851 | 3.019672  |
| S  | 11.960929 | 1.500487  | 3.074116  |
| S  | 9.218711  | 3.251372  | 3.114202  |
| C  | 0.989620  | 0.058741  | 4.307343  |
| O  | 9.980301  | 0.467030  | 5.015719  |
| O  | 9.033770  | 0.228627  | 2.955384  |
| H  | 8.220354  | -0.526766 | 4.668520  |

|    |           |           |           |
|----|-----------|-----------|-----------|
| Cu | 9.683778  | -1.517160 | 1.199354  |
| S  | 0.904289  | 1.566441  | 0.021289  |
| S  | 0.864089  | 4.758235  | 0.072831  |
| S  | 0.886954  | 7.932011  | 0.046791  |
| S  | 3.622918  | -0.013441 | -0.008022 |
| S  | 3.612315  | 3.193140  | -0.013347 |
| S  | 3.603679  | 6.382551  | 0.006019  |
| S  | 6.378236  | -1.587104 | -0.109933 |
| S  | 6.312889  | 1.642742  | -0.145937 |
| S  | 6.354884  | 4.797125  | -0.100422 |
| S  | 9.136715  | -3.294039 | -0.203002 |
| S  | 9.092228  | 0.119528  | -0.177494 |
| S  | 9.182729  | 3.257051  | -0.147078 |
| S  | 11.993306 | -4.795945 | 0.015903  |
| S  | 11.822240 | -1.649748 | 0.337853  |
| S  | 11.922356 | 1.563491  | -0.039983 |
| S  | 0.881730  | 1.555463  | 3.143278  |
| S  | 0.960268  | 4.722151  | 3.197718  |
| S  | 0.901069  | 7.968496  | 3.180107  |
| S  | 3.698972  | -0.003318 | 3.109421  |
| S  | 3.703756  | 3.181352  | 3.117829  |
| S  | 3.709588  | 6.385447  | 3.122494  |
| S  | 6.545295  | -1.508033 | 2.975319  |
| S  | 6.490471  | 1.605179  | 3.021411  |
| S  | 6.459334  | 4.810704  | 3.016830  |
| S  | 9.253905  | -3.009672 | 2.883023  |
| S  | 11.894850 | -4.936692 | 3.142279  |
| S  | 11.742129 | 1.593587  | 3.052306  |
| S  | 9.106189  | 3.160165  | 3.033108  |
| C  | 12.187201 | -1.044031 | 3.365141  |
| O  | 12.058070 | -2.288277 | 3.384713  |
| H  | 11.979516 | -0.559189 | 4.344149  |

|      |           |           |           |
|------|-----------|-----------|-----------|
| COH* |           |           |           |
| Mo   | 1.812205  | 0.018912  | 1.591892  |
| Mo   | 1.818478  | 3.192296  | 1.603665  |
| Mo   | 1.839539  | 6.389457  | 1.576875  |
| Mo   | 4.573607  | -1.579652 | 1.597889  |
| Mo   | 4.584714  | 1.607204  | 1.612011  |
| Mo   | 4.573857  | 4.783187  | 1.592193  |
| Mo   | 7.285103  | -3.162566 | 1.501440  |
| Mo   | 7.300088  | 0.004783  | 1.507686  |
| Mo   | 7.350682  | 3.168745  | 1.547939  |
| Mo   | 10.047865 | -4.780430 | 1.503236  |
| Mo   | 10.093171 | 1.618730  | 1.491482  |
| Mo   | 12.843457 | -6.360572 | 1.573677  |
| Mo   | 12.924026 | -3.151403 | 1.475887  |
| Mo   | 12.901578 | 0.041988  | 1.486696  |
| Cu   | 10.460492 | -1.933662 | 1.285541  |
| S    | 0.887393  | 1.612820  | 0.033675  |
| S    | 0.997474  | 4.780908  | -0.008993 |
| S    | 0.970619  | 7.988467  | -0.020492 |
| S    | 3.654469  | 0.021752  | 0.047349  |
| S    | 3.655210  | 3.183997  | 0.044418  |
| S    | 3.675750  | 6.390995  | 0.026759  |
| S    | 6.365852  | -1.581749 | -0.023982 |
| S    | 6.387619  | 1.575944  | -0.008343 |
| S    | 6.380425  | 4.759751  | -0.008887 |
| S    | 9.081514  | -3.320913 | -0.152196 |
| S    | 9.292823  | -0.193254 | 0.300865  |
| S    | 9.176000  | 3.162358  | -0.047896 |
| S    | 11.931391 | -4.794284 | -0.024894 |
| S    | 12.156355 | -1.613625 | -0.186333 |
| S    | 11.947687 | 1.632020  | -0.037141 |
| S    | 0.862093  | 1.604612  | 3.156515  |
| S    | 0.866248  | 4.812615  | 3.130968  |
| S    | 0.866262  | 7.981781  | 3.121142  |
| S    | 3.649493  | 0.013211  | 3.165262  |
| S    | 3.661470  | 3.198246  | 3.173334  |
| S    | 3.662842  | 6.385523  | 3.159288  |
| S    | 6.468649  | -1.551275 | 3.121647  |
| S    | 6.480634  | 1.578397  | 3.132491  |
| S    | 6.449770  | 4.798282  | 3.103221  |
| S    | 9.236028  | -2.985485 | 2.898688  |
| S    | 11.907056 | -4.690574 | 3.069907  |
| S    | 11.872005 | 1.537333  | 3.101509  |
| S    | 9.184598  | 3.169919  | 3.097045  |
| C    | 12.158398 | -1.540041 | 2.658812  |
| O    | 11.869282 | -1.579128 | 3.953250  |
| H    | 11.754605 | -0.660217 | 4.302439  |

|                    |           |           |           |
|--------------------|-----------|-----------|-----------|
| CH <sub>2</sub> O* |           |           |           |
| Mo                 | 1.869423  | 0.036746  | 1.539319  |
| Mo                 | 1.853100  | 3.219991  | 1.556929  |
| Mo                 | 1.856163  | 6.412536  | 1.536356  |
| Mo                 | 4.607657  | -1.567811 | 1.502471  |
| Mo                 | 4.605408  | 1.623830  | 1.516603  |
| Mo                 | 4.592096  | 4.788044  | 1.501986  |
| Mo                 | 7.283310  | -3.215383 | 1.442902  |
| Mo                 | 7.314995  | 0.045341  | 1.437758  |
| Mo                 | 7.371634  | 3.151791  | 1.486191  |
| Mo                 | 10.083202 | -4.866259 | 1.526366  |
| Mo                 | 10.151111 | 1.641797  | 1.500849  |
| Mo                 | 12.897916 | -6.339819 | 1.585039  |
| Mo                 | 12.966979 | -3.126450 | 1.590274  |
| Mo                 | 12.961336 | 0.083566  | 1.555598  |
| Cu                 | 10.134548 | -2.075138 | 1.551495  |
| S                  | 0.909117  | 1.637564  | -0.000996 |
| S                  | 0.919040  | 4.810140  | -0.008756 |
| S                  | 0.939319  | 8.019490  | -0.030618 |
| S                  | 3.678209  | 0.030652  | -0.046230 |
| S                  | 3.653832  | 3.204324  | -0.045534 |
| S                  | 3.673817  | 6.405307  | -0.049896 |
| S                  | 6.418911  | -1.591502 | -0.096685 |
| S                  | 6.410615  | 1.586799  | -0.099073 |
| S                  | 6.406997  | 4.735829  | -0.089590 |
| S                  | 9.151152  | -3.343987 | -0.109074 |

|   |           |           |           |
|---|-----------|-----------|-----------|
| S | 9.314354  | -0.174123 | 0.340946  |
| S | 9.234370  | 3.136794  | -0.085699 |
| S | 12.008885 | -4.722978 | 0.036767  |
| S | 11.924685 | -1.568714 | 0.121698  |
| S | 12.020052 | 1.646004  | -0.009677 |
| S | 0.946964  | 1.621713  | 3.121069  |
| S | 0.984403  | 4.820866  | 3.136146  |
| S | 0.985048  | 8.029161  | 3.112684  |
| S | 3.716382  | 0.027033  | 3.081656  |
| S | 3.707278  | 3.209526  | 3.091814  |
| S | 3.713033  | 6.403157  | 3.074655  |
| S | 6.490706  | -1.559625 | 3.030793  |
| S | 6.472345  | 1.585323  | 3.065752  |
| S | 6.436728  | 4.762268  | 3.039622  |
| S | 9.069440  | -3.287343 | 3.059443  |
| S | 11.945790 | -4.721966 | 3.106339  |
| S | 11.941955 | 1.595678  | 3.115129  |
| S | 9.169272  | 3.116165  | 3.102034  |
| C | 11.082325 | -1.534323 | 3.354667  |
| O | 12.358783 | -1.445677 | 2.919411  |
| H | 10.972683 | -2.289618 | 4.142431  |
| H | 10.590167 | -0.575564 | 3.580256  |

|       |           |           |           |
|-------|-----------|-----------|-----------|
| CHOH* |           |           |           |
| Mo    | 1.820649  | 0.023212  | 1.602950  |
| Mo    | 1.799587  | 3.189683  | 1.611567  |
| Mo    | 1.841451  | 6.388294  | 1.602693  |
| Mo    | 4.579932  | -1.598163 | 1.545648  |
| Mo    | 4.582520  | 1.591555  | 1.565551  |
| Mo    | 4.554238  | 4.765554  | 1.553998  |
| Mo    | 7.292697  | -3.231514 | 1.429896  |
| Mo    | 7.312677  | 0.028771  | 1.418028  |
| Mo    | 7.335993  | 3.138531  | 1.499740  |
| Mo    | 10.039541 | -4.818337 | 1.497490  |
| Mo    | 10.084442 | 1.607581  | 1.510743  |
| Mo    | 12.830857 | -6.344015 | 1.612299  |
| Mo    | 12.891267 | -3.125608 | 1.585345  |
| Mo    | 12.913898 | 0.052630  | 1.622302  |
| Cu    | 9.878492  | -1.899404 | 1.149309  |
| S     | 0.861478  | 1.612483  | 0.052600  |
| S     | 0.911816  | 4.801139  | 0.049794  |
| S     | 0.927223  | 7.984930  | 0.041786  |
| S     | 3.630605  | 0.005531  | 0.013978  |
| S     | 3.606605  | 3.172637  | 0.017185  |
| S     | 3.635827  | 6.375823  | 0.001060  |
| S     | 6.366921  | -1.613497 | -0.086926 |
| S     | 6.358538  | 1.576944  | -0.080399 |
| S     | 6.337922  | 4.710207  | -0.059289 |
| S     | 9.019507  | -3.468835 | -0.258773 |
| S     | 9.219328  | -0.066166 | 0.078544  |
| S     | 9.196864  | 3.117829  | -0.068416 |
| S     | 11.938525 | -4.750546 | 0.025731  |
| S     | 11.921710 | -1.553683 | 0.139300  |
| S     | 11.970762 | 1.617641  | 0.029991  |
| S     | 0.866617  | 1.607062  | 3.174749  |
| S     | 0.895899  | 4.802758  | 3.167492  |
| S     | 0.944204  | 8.005360  | 3.172442  |
| S     | 3.691016  | -0.001381 | 3.133518  |
| S     | 3.670520  | 3.178935  | 3.144006  |
| S     | 3.700863  | 6.380326  | 3.137937  |
| S     | 6.503586  | -1.567468 | 3.028715  |
| S     | 6.486298  | 1.550779  | 3.080048  |
| S     | 6.434104  | 4.767062  | 3.049253  |
| S     | 9.157243  | -3.127488 | 2.952362  |
| S     | 11.870920 | -4.683026 | 3.125577  |
| S     | 11.852506 | 1.578920  | 3.157559  |
| S     | 9.142563  | 3.145527  | 3.086093  |
| C     | 12.238909 | -1.461849 | 3.071424  |
| O     | 12.517201 | -1.490537 | 4.415000  |
| H     | 13.457501 | -1.258593 | 4.579374  |
| H     | 11.144478 | -1.550876 | 3.022916  |

|                    |           |           |           |
|--------------------|-----------|-----------|-----------|
| CH <sub>2</sub> O* |           |           |           |
| Mo                 | 1.828372  | 0.032608  | 1.574197  |
| Mo                 | 1.819102  | 3.204178  | 1.584102  |
| Mo                 | 1.832945  | 6.406276  | 1.561413  |
| Mo                 | 4.581634  | -1.583650 | 1.504661  |
| Mo                 | 4.591113  | 1.598429  | 1.528539  |
| Mo                 | 4.562292  | 4.778579  | 1.509509  |
| Mo                 | 7.286479  | -3.214700 | 1.388203  |
| Mo                 | 7.329501  | 0.019702  | 1.383407  |
| Mo                 | 7.342299  | 3.143871  | 1.453930  |
| Mo                 | 10.035024 | -4.789394 | 1.452165  |
| Mo                 | 10.121883 | 1.596927  | 1.464550  |
| Mo                 | 12.858048 | -6.333190 | 1.578618  |
| Mo                 | 12.920064 | -3.079635 | 1.568108  |
| Mo                 | 12.897893 | 0.061248  | 1.576301  |
| Cu                 | 9.996367  | -1.951033 | 1.151574  |
| S                  | 0.885324  | 1.628708  | 0.020465  |
| S                  | 0.916328  | 4.798120  | 0.012135  |
| S                  | 0.903759  | 8.020914  | 0.010597  |
| S                  | 3.633655  | 0.018586  | -0.023549 |
| S                  | 3.620504  | 3.180993  | -0.020390 |
| S                  | 3.635643  | 6.392806  | -0.040894 |
| S                  | 6.372953  | -1.607194 | -0.127172 |
| S                  | 6.374117  | 1.571415  | -0.115741 |
| S                  | 6.352055  | 4.721359  | -0.105418 |
| S                  | 9.030770  | -3.461446 | -0.310242 |
| S                  | 9.259734  | -0.124523 | 0.097326  |
| S                  | 9.217271  | 3.123143  | -0.098935 |
| S                  | 11.982673 | -4.711989 | 0.003618  |
| S                  | 11.980100 | -1.560267 | 0.039011  |
| S                  | 12.004299 | 1.629557  | -0.011814 |
| S                  | 0.889340  | 1.619536  | 3.147692  |
| S                  | 0.926596  | 4.821509  | 3.139860  |
| S                  | 0.925483  | 8.013175  | 3.134958  |
| S                  | 3.700434  | 0.007275  | 3.098902  |

|   |           |           |          |
|---|-----------|-----------|----------|
| S | 3.696034  | 3.192187  | 3.106088 |
| S | 3.699230  | 6.393524  | 3.090744 |
| S | 6.500241  | -1.569036 | 2.992376 |
| S | 6.499462  | 1.553131  | 3.038406 |
| S | 6.441174  | 4.774113  | 3.003951 |
| S | 9.160958  | -3.120016 | 2.917474 |
| S | 11.878422 | -4.680475 | 3.061516 |
| S | 11.873393 | 1.607408  | 3.113532 |
| S | 9.159456  | 3.146001  | 3.028638 |
| C | 12.043873 | -1.534386 | 4.249702 |
| O | 12.153790 | -1.525875 | 2.818871 |
| H | 13.033456 | -1.506778 | 4.732682 |
| H | 11.462453 | -0.653606 | 4.557969 |
| H | 11.511005 | -2.445886 | 4.554563 |

| CH <sub>3</sub> OH* |           |           |           |
|---------------------|-----------|-----------|-----------|
| Mo                  | 1.841994  | -0.018341 | 1.610344  |
| Mo                  | 1.843015  | 3.163448  | 1.620441  |
| Mo                  | 1.820651  | 6.358369  | 1.660362  |
| Mo                  | 4.607113  | -1.593845 | 1.534783  |
| Mo                  | 4.589757  | 1.595858  | 1.531757  |
| Mo                  | 4.585276  | 4.780304  | 1.538915  |
| Mo                  | 7.367152  | -3.198792 | 1.425860  |
| Mo                  | 7.326269  | 0.115738  | 1.343322  |
| Mo                  | 7.344155  | 3.193736  | 1.435498  |
| Mo                  | 10.146268 | -4.839757 | 1.505969  |
| Mo                  | 10.000462 | 1.667373  | 1.403348  |
| Mo                  | 12.875268 | -6.407982 | 1.576004  |
| Mo                  | 12.897461 | -3.310142 | 1.736026  |
| Mo                  | 12.852284 | 0.060529  | 1.716320  |
| Cu                  | 9.654221  | -1.521425 | 1.211891  |
| S                   | 0.927953  | 1.569275  | 0.040118  |
| S                   | 0.857243  | 4.772362  | 0.111291  |
| S                   | 0.871802  | 7.931068  | 0.104936  |
| S                   | 3.637074  | -0.020025 | 0.001210  |
| S                   | 3.619537  | 3.190567  | -0.001279 |
| S                   | 3.605647  | 6.376605  | 0.025155  |
| S                   | 6.391351  | -1.598165 | -0.107163 |
| S                   | 6.327885  | 1.636603  | -0.144934 |
| S                   | 6.370637  | 4.787354  | -0.094187 |
| S                   | 9.169406  | -3.307659 | -0.183962 |
| S                   | 9.115375  | 0.122749  | -0.159994 |
| S                   | 9.206802  | 3.243159  | -0.149977 |
| S                   | 12.027542 | -4.776118 | 0.039151  |
| S                   | 11.806302 | -1.612640 | 0.437488  |
| S                   | 11.964557 | 1.556599  | 0.007338  |
| S                   | 9.908804  | 1.559210  | 1.654222  |
| S                   | 9.909666  | 4.721416  | 3.236595  |
| S                   | 9.931905  | 7.988054  | 3.208964  |
| S                   | 3.729060  | -0.006613 | 3.127260  |
| S                   | 3.727155  | 3.173119  | 3.127978  |
| S                   | 3.740566  | 6.380365  | 3.126590  |
| S                   | 5.563451  | -1.518101 | 2.897575  |
| S                   | 5.508686  | 1.596555  | 3.023086  |
| S                   | 6.478103  | 4.796866  | 3.201926  |
| S                   | 9.264807  | -3.025486 | 2.894693  |
| S                   | 11.909133 | -4.933528 | 3.161351  |
| S                   | 11.761745 | 1.660064  | 3.093682  |
| S                   | 9.118234  | 3.156667  | 3.048442  |
| C                   | 11.924472 | -0.572565 | 3.552695  |
| O                   | 10.090102 | -2.311457 | 3.592676  |
| H                   | 12.328646 | -0.469423 | 4.489652  |
| H                   | 10.838683 | -0.707800 | 3.533555  |
| H                   | 12.728216 | -2.364657 | 4.252379  |

|                   |           |           |           |
|-------------------|-----------|-----------|-----------|
| S                 | 11.883952 | 1.540294  | 3.121611  |
| S                 | 9.180704  | 3.180054  | 3.128698  |
| C                 | 12.058531 | -1.564057 | 2.565979  |
| H                 | 11.734941 | -1.598950 | 3.616118  |
| <hr/>             |           |           |           |
| <hr/>             |           |           |           |
| CH <sub>3</sub> * |           |           |           |
| <hr/>             |           |           |           |
| Mo                | 1.819876  | -0.012927 | 1.606178  |
| Mo                | 1.826085  | 3.188563  | 1.599432  |
| Mo                | 1.813727  | 6.375749  | 1.556016  |
| Mo                | 4.599496  | -1.572967 | 1.612742  |
| Mo                | 4.573955  | 1.615229  | 1.622630  |
| Mo                | 4.583505  | 4.803796  | 1.607550  |
| Mo                | 7.348621  | -3.169262 | 1.562726  |
| Mo                | 7.326522  | 0.073072  | 1.629792  |
| Mo                | 7.339617  | 3.221963  | 1.598792  |
| Mo                | 10.117791 | -4.796643 | 1.482584  |
| Mo                | 10.080355 | 1.603116  | 1.574054  |
| Mo                | 12.863355 | -6.406438 | 1.567590  |
| Mo                | 12.959237 | -3.185527 | 1.425596  |
| Mo                | 12.930689 | -0.046036 | 1.472665  |
| Cu                | 10.271791 | -1.918105 | 1.198914  |
| S                 | 0.909582  | 1.578946  | 0.041543  |
| S                 | 0.982992  | 4.735563  | -0.048088 |
| S                 | 0.943357  | 7.999206  | -0.027105 |
| S                 | 3.672289  | 0.015932  | 0.056914  |
| S                 | 3.673840  | 3.196125  | 0.050102  |
| S                 | 3.691854  | 6.401628  | 0.035071  |
| S                 | 6.439018  | -1.558355 | 0.045545  |
| S                 | 6.404301  | 1.631285  | 0.049749  |
| S                 | 6.403776  | 4.797704  | 0.030740  |
| S                 | 9.092467  | -3.350213 | -0.166843 |
| S                 | 9.224361  | -0.092800 | 0.182442  |
| S                 | 9.149962  | 3.153628  | -0.006188 |
| S                 | 11.977593 | -4.839882 | -0.051890 |

|   |           |           |           |
|---|-----------|-----------|-----------|
| S | 12.055102 | -1.625271 | -0.069053 |
| S | 11.946766 | 1.567171  | -0.009078 |
| S | 0.873319  | 1.585248  | 3.153184  |
| S | 0.847403  | 4.824811  | 3.113049  |
| S | 0.848502  | 7.911057  | 3.127239  |
| S | 3.655954  | 0.003457  | 3.179543  |
| S | 3.650727  | 3.215852  | 3.178504  |
| S | 3.641073  | 6.399151  | 3.151855  |
| S | 6.485427  | -1.563778 | 3.167852  |
| S | 6.411998  | 1.650473  | 3.186649  |
| S | 6.447253  | 4.832969  | 3.153919  |
| S | 9.338737  | -3.060536 | 2.960691  |
| S | 11.970432 | -4.700637 | 3.050737  |
| S | 11.937757 | 1.460853  | 3.106356  |
| S | 9.225168  | 3.237989  | 3.111955  |
| C | 9.011533  | 0.329557  | 3.004189  |
| H | 8.796998  | 0.751378  | 3.993981  |
| H | 9.573485  | -0.600857 | 3.144535  |

|                   |           |           |          |
|-------------------|-----------|-----------|----------|
| <hr/>             |           |           |          |
| <hr/>             |           |           |          |
| CH <sub>3</sub> * |           |           |          |
| <hr/>             |           |           |          |
| Mo                | 1.822728  | -0.002457 | 1.592503 |
| Mo                | 1.844021  | 3.187775  | 1.578348 |
| Mo                | 1.828410  | 6.375762  | 1.529444 |
| Mo                | 4.582209  | -1.574746 | 1.620856 |
| Mo                | 4.593223  | 1.607966  | 1.645366 |
| Mo                | 4.600241  | 4.789780  | 1.603038 |
| Mo                | 7.325553  | -3.141105 | 1.570212 |
| Mo                | 7.327544  | 0.017089  | 1.673402 |
| Mo                | 7.358565  | 3.205808  | 1.608832 |
| Mo                | 10.117392 | -4.783168 | 1.463042 |
| Mo                | 10.081847 | 1.576237  | 1.589975 |
| Mo                | 12.871303 | -6.387021 | 1.524824 |
| Mo                | 12.993644 | -3.165739 | 1.374566 |
| Mo                | 12.956258 | -0.053045 | 1.429969 |

|    |           |           |           |
|----|-----------|-----------|-----------|
| Cu | 10.416591 | -1.930350 | 1.161423  |
| S  | 0.923820  | 1.585031  | 0.012303  |
| S  | 1.026162  | 4.732273  | -0.082628 |
| S  | 0.973097  | 8.013906  | -0.054347 |
| S  | 3.684983  | 0.026711  | 0.063003  |
| S  | 3.709084  | 3.177521  | 0.049076  |
| S  | 3.715820  | 6.395848  | 0.025939  |
| S  | 6.424158  | -1.539884 | 0.064714  |
| S  | 6.435671  | 1.575575  | 0.085176  |
| S  | 6.431519  | 4.794652  | 0.035704  |
| S  | 9.105207  | -3.306649 | -0.168709 |
| S  | 9.236031  | -0.154173 | 0.241018  |
| S  | 9.159267  | 3.127352  | 0.003974  |
| S  | 11.974358 | -4.822541 | -0.089672 |
| S  | 12.149276 | -1.617111 | -0.167368 |
| S  | 11.928351 | 1.565510  | -0.027500 |
| S  | 0.867580  | 1.602076  | 3.127337  |
| S  | 0.855711  | 4.829175  | 3.083400  |
| S  | 0.852384  | 7.906478  | 3.102529  |
| S  | 3.636623  | 0.005769  | 3.187754  |
| S  | 3.653684  | 3.216442  | 3.178990  |
| S  | 3.631259  | 6.378761  | 3.141743  |
| S  | 6.403139  | -1.608348 | 3.197381  |
| S  | 6.432165  | 1.640496  | 3.211008  |
| S  | 6.457517  | 4.827993  | 3.155315  |
| S  | 9.374182  | -3.000445 | 2.898568  |
| S  | 11.982252 | -4.673666 | 3.003347  |
| S  | 11.993135 | 1.495524  | 3.058590  |
| S  | 9.245657  | 3.255714  | 3.105061  |
| C  | 9.236583  | 0.276137  | 3.233401  |
| H  | 9.022925  | 0.815361  | 4.162414  |
| H  | 8.496520  | -0.583036 | 3.212039  |
| H  | 10.130852 | -0.355245 | 3.360517  |

### 3. Adsorption of species on Mo edge

|                   |           |           |           |
|-------------------|-----------|-----------|-----------|
| <hr/>             |           |           |           |
| <hr/>             |           |           |           |
| H <sub>2</sub> O* |           |           |           |
| <hr/>             |           |           |           |
| Mo                | 3.216002  | 9.399402  | 0.924174  |
| Mo                | 9.587486  | 9.162050  | 0.933636  |
| Mo                | -0.061894 | 9.399116  | 0.928819  |
| Mo                | 6.312666  | 9.165728  | 0.940811  |
| Mo                | 11.143921 | 9.339449  | 3.683239  |
| Mo                | 7.945213  | 9.342063  | 3.692933  |
| Mo                | 1.581279  | 9.343186  | 3.688240  |
| Mo                | 4.764608  | 9.345580  | 3.699523  |
| Mo                | 9.548956  | 9.397687  | 6.435452  |
| Mo                | -0.021024 | 9.392429  | 6.441428  |
| Mo                | 6.345128  | 9.398879  | 6.471923  |
| Mo                | 3.180692  | 9.399975  | 6.462698  |
| Mo                | 4.996525  | 9.473168  | 9.265849  |
| Mo                | 1.327296  | 9.449793  | 9.129441  |
| Mo                | 11.313480 | 9.446484  | 9.199341  |
| Mo                | 7.804459  | 9.430790  | 9.223702  |
| S                 | 1.575718  | 8.122565  | -0.282843 |
| S                 | 4.763841  | 7.700653  | 0.063346  |
| S                 | 11.141123 | 7.706068  | 0.058705  |
| S                 | 1.575664  | 10.815112 | -0.123259 |
| S                 | 7.945720  | 7.700132  | -0.046927 |
| S                 | 7.948049  | 10.382414 | -0.330077 |
| S                 | 4.766854  | 10.818671 | -0.014128 |
| S                 | 11.138479 | 10.816748 | -0.009720 |
| S                 | 3.169465  | 10.915487 | 2.775325  |
| S                 | -0.010208 | 7.787862  | 2.736510  |
| S                 | 6.362118  | 10.856672 | 2.678786  |
| S                 | 9.538431  | 7.731747  | 2.848729  |
| S                 | 6.358735  | 7.730642  | 2.856154  |
| S                 | 3.170477  | 7.793702  | 2.736267  |
| S                 | 9.538522  | 10.847715 | 2.671937  |
| S                 | -0.012674 | 10.915964 | 2.779532  |
| S                 | 1.605286  | 7.826517  | 5.556221  |
| S                 | 7.947441  | 10.939216 | 5.497582  |
| S                 | 4.744569  | 7.823760  | 5.569887  |
| S                 | 1.599529  | 10.928697 | 5.501350  |
| S                 | 11.137514 | 7.814321  | 5.542056  |
| S                 | 7.947416  | 7.824127  | 5.570164  |
| S                 | 4.752562  | 10.943282 | 5.506766  |
| S                 | 11.132213 | 10.938185 | 5.478959  |
| S                 | 3.179422  | 7.969931  | 8.492056  |
| S                 | -0.058815 | 11.093080 | 8.165497  |
| S                 | 6.352554  | 7.790757  | 8.282767  |
| S                 | -0.046354 | 7.759821  | 8.235689  |
| S                 | 6.377868  | 11.074128 | 8.237559  |
| S                 | 9.556731  | 7.923509  | 8.355589  |
| S                 | 9.551779  | 10.932565 | 8.306265  |
| S                 | 3.153301  | 10.944603 | 8.385752  |
| S                 | 6.407542  | 9.217113  | 11.117326 |
| S                 | 0.145984  | 9.509035  | 11.062249 |
| S                 | 9.600495  | 9.496838  | 10.867089 |
| O                 | 3.642572  | 9.960541  | 11.110998 |
| H                 | 3.264643  | 10.863306 | 11.084144 |
| H                 | 4.203496  | 9.893226  | 11.915983 |
| <hr/>             |           |           |           |
| <hr/>             |           |           |           |
| CO*               |           |           |           |
| <hr/>             |           |           |           |
| Mo                | 3.111097  | 9.432081  | 0.935322  |
| Mo                | 9.486134  | 9.232897  | 0.940765  |
| Mo                | 0.004355  | 9.228901  | 0.939333  |
| Mo                | 6.378145  | 9.427461  | 0.946992  |
| Mo                | 11.122003 | 9.339488  | 3.682053  |
| Mo                | 7.927191  | 9.332376  | 3.699839  |
| Mo                | 1.560302  | 9.333833  | 3.693146  |

|       |           |           |           |
|-------|-----------|-----------|-----------|
| Mo    | 4.740679  | 9.322842  | 3.698762  |
| Mo    | 9.528630  | 9.327113  | 6.443461  |
| Mo    | -0.045113 | 9.332744  | 6.437247  |
| Mo    | 6.337346  | 9.293822  | 6.466002  |
| Mo    | 3.151154  | 9.313746  | 6.474534  |
| Mo    | 4.877813  | 9.307479  | 9.264718  |
| Mo    | 1.315694  | 9.320514  | 9.144719  |
| Mo    | 11.292520 | 9.356076  | 9.216916  |
| Mo    | 7.780803  | 9.256017  | 9.233865  |
| S     | 1.551004  | 7.771290  | 0.031078  |
| S     | 4.748446  | 8.147916  | -0.267192 |
| S     | 11.122316 | 7.798363  | -0.086373 |
| S     | 1.566435  | 9.287268  | 0.007617  |
| S     | 7.935809  | 7.774871  | 0.033076  |
| S     | 7.925255  | 10.875622 | 0.023645  |
| S     | 4.749393  | 10.845072 | -0.107920 |
| S     | 11.122504 | 10.497918 | -0.279172 |
| S     | 3.159292  | 10.917016 | 2.811344  |
| S     | -0.041880 | 7.746654  | 2.815710  |
| S     | 6.326300  | 10.918859 | 2.823421  |
| S     | 9.529663  | 7.748541  | 2.813333  |
| S     | 6.336689  | 7.787429  | 2.723747  |
| S     | 3.149038  | 7.792225  | 2.712022  |
| S     | 9.521582  | 10.873855 | 2.717371  |
| S     | -0.036227 | 10.876282 | 2.713956  |
| S     | 1.569458  | 7.774489  | 5.527339  |
| S     | 7.924420  | 10.880715 | 5.549361  |
| S     | 4.727041  | 7.759844  | 5.529895  |
| S     | 1.576894  | 10.883832 | 5.536524  |
| S     | 11.116585 | 7.777471  | 5.513149  |
| S     | 7.948888  | 7.759300  | 5.521335  |
| S     | 4.733882  | 10.868157 | 5.556150  |
| S     | 11.109590 | 10.896621 | 5.516805  |
| S     | 3.114765  | 7.831772  | 8.446426  |
| S     | -0.092324 | 10.975561 | 8.224027  |
| S     | 6.352450  | 7.646940  | 8.234668  |
| S     | -0.068712 | 7.661227  | 8.200533  |
| S     | 6.338422  | 10.916109 | 8.295382  |
| S     | 9.547792  | 7.792333  | 8.320848  |
| S     | 9.519728  | 10.799249 | 8.370562  |
| S     | 3.089718  | 10.841767 | 8.380649  |
| S     | 6.381249  | 8.923128  | 11.086430 |
| S     | 0.131724  | 9.306191  | 11.077963 |
| S     | 9.565665  | 9.264530  | 10.883107 |
| C     | 4.068807  | 10.240386 | 10.916490 |
| O     | 3.698771  | 10.785286 | 11.870779 |
| <hr/> |           |           |           |
| <hr/> |           |           |           |
| OH*   |           |           |           |
| <hr/> |           |           |           |
| Mo    | 3.214904  | 9.319500  | 0.948295  |
| Mo    | 9.602517  | 9.319500  | 0.970581  |
| Mo    | -0.044440 | 9.319500  | 0.961080  |
| Mo    | 6.355237  | 9.319500  | 0.961500  |
| Mo    | 11.161727 | 9.319500  | 3.713438  |
| Mo    | 7.970408  | 9.319500  | 3.696810  |
| Mo    | 1.590466  | 9.319500  | 3.669565  |
| Mo    | 4.788590  | 9.319500  | 3.676650  |
| Mo    | 9.569025  | 9.319500  | 6.461441  |
| Mo    | 0.011063  | 9.319500  | 6.448630  |
| Mo    | 6.365893  | 9.319500  | 6.447325  |
| Mo    | 3.191355  | 9.319499  | 6.394400  |
| Mo    | 4.922754  | 9.319499  | 9.222318  |
| Mo    | 1.458153  | 9.319499  | 9.222613  |
| Mo    | 11.368980 | 9.319499  | 9.253235  |
| Mo    | 7.767801  | 9.319500  | 9.251899  |
| S     | 1.582498  | 7.953135  | -0.154450 |

|       |           |           |           |
|-------|-----------|-----------|-----------|
| S     | 4.788308  | 7.796606  | 0.014319  |
| S     | 11.154442 | 7.771987  | 0.049211  |
| S     | 1.582498  | 10.685864 | -0.154450 |
| S     | 7.980834  | 7.950567  | -0.143652 |
| S     | 7.980834  | 10.688432 | -0.143652 |
| S     | 4.788308  | 10.842393 | 0.014319  |
| S     | 11.154442 | 10.867012 | 0.049211  |
| S     | 3.189125  | 10.891075 | 2.759953  |
| S     | -0.009336 | 7.747248  | 2.779981  |
| S     | 6.385197  | 10.895245 | 2.774879  |
| S     | 9.567957  | 7.749598  | 2.794153  |
| S     | 6.385197  | 7.743754  | 2.774879  |
| S     | 3.189125  | 7.747924  | 2.759953  |
| S     | 9.567957  | 10.889041 | 2.794153  |
| S     | -0.009336 | 10.891751 | 2.779981  |
| S     | 1.596226  | 7.757685  | 5.504512  |
| S     | 7.976481  | 10.876858 | 5.544861  |
| S     | 4.783655  | 7.753741  | 5.506225  |
| S     | 1.596226  | 10.881351 | 5.504513  |
| S     | 11.159009 | 7.755720  | 5.552725  |
| S     | 7.976481  | 7.762141  | 5.544861  |
| S     | 4.783655  | 10.885259 | 5.506225  |
| S     | 11.159009 | 10.883279 | 5.552725  |
| S     | 3.190590  | 7.807936  | 8.283460  |
| S     | 0.030279  | 10.949723 | 8.262800  |
| S     | 6.351569  | 7.689586  | 8.261507  |
| S     | 0.030279  | 7.689276  | 8.262799  |
| S     | 6.351569  | 10.949413 | 8.261508  |
| S     | 9.568214  | 7.835567  | 8.382229  |
| S     | 9.568214  | 10.803432 | 8.382228  |
| S     | 3.190590  | 10.831063 | 8.283461  |
| S     | 6.276694  | 9.831069  | 11.115737 |
| S     | 0.105711  | 9.319499  | 11.115898 |
| S     | 9.568714  | 9.319499  | 10.886740 |
| O     | 3.191549  | 9.319500  | 10.535391 |
| H     | 3.192426  | 9.319500  | 11.508394 |
| <hr/> |           |           |           |
| H*    |           |           |           |
| <hr/> |           |           |           |
| Mo    | 3.219819  | 9.319500  | 0.949730  |
| Mo    | 9.602748  | 9.319500  | 0.977821  |
| Mo    | -0.047401 | 9.319500  | 0.963488  |
| Mo    | 6.351919  | 9.319500  | 0.966160  |
| Mo    | 11.160592 | 9.319500  | 3.724077  |
| Mo    | 7.972585  | 9.319500  | 3.714433  |
| Mo    | 1.593127  | 9.319500  | 3.678368  |
| Mo    | 4.785222  | 9.319500  | 3.685398  |
| Mo    | 9.567949  | 9.319500  | 6.478989  |
| Mo    | 0.013888  | 9.319500  | 6.448093  |
| Mo    | 6.361703  | 9.319500  | 6.447883  |
| Mo    | 3.191336  | 9.319499  | 6.417506  |
| Mo    | 4.862341  | 9.319499  | 9.191559  |
| Mo    | 1.518685  | 9.319499  | 9.191454  |
| Mo    | 11.386961 | 9.319499  | 9.272508  |
| Mo    | 7.750824  | 9.319500  | 9.272398  |
| S     | 1.581941  | 7.954605  | -0.151002 |
| S     | 4.790316  | 7.786409  | 0.028774  |
| S     | 11.151755 | 7.768940  | 0.058586  |
| S     | 1.581941  | 10.684394 | -0.151002 |
| S     | 7.980663  | 7.950892  | -0.136488 |
| S     | 7.980663  | 10.688107 | -0.136488 |
| S     | 4.790316  | 10.852590 | 0.028774  |
| S     | 11.151755 | 10.870599 | 0.058586  |
| S     | 3.188682  | 10.889471 | 2.763980  |
| S     | -0.008258 | 7.749193  | 2.786456  |
| S     | 6.386168  | 10.891568 | 2.785589  |

|   |           |           |           |
|---|-----------|-----------|-----------|
| S | 9.566443  | 7.751433  | 2.806381  |
| S | 6.386168  | 7.747431  | 2.785589  |
| S | 3.188682  | 7.749528  | 2.763980  |
| S | 9.566443  | 10.887566 | 2.806381  |
| S | -0.008258 | 10.889806 | 2.786456  |
| S | 1.599676  | 7.757870  | 5.509085  |
| S | 7.977526  | 10.878239 | 5.560709  |
| S | 4.779529  | 7.753912  | 5.512063  |
| S | 1.599676  | 10.881130 | 5.509086  |
| S | 11.157511 | 7.755979  | 5.563087  |
| S | 7.977526  | 7.760760  | 5.560709  |
| S | 4.779529  | 10.885088 | 5.512063  |
| S | 11.157511 | 10.883020 | 5.563087  |
| S | 3.190634  | 7.776237  | 8.294590  |
| S | 0.037128  | 10.941749 | 8.267707  |
| S | 6.343324  | 7.696590  | 8.267756  |
| S | 0.037128  | 7.697250  | 8.267706  |
| S | 6.343324  | 10.942409 | 8.267757  |
| S | 9.568372  | 7.846504  | 8.408340  |
| S | 9.568372  | 10.792495 | 8.408339  |
| S | 3.190634  | 10.862762 | 8.294591  |
| S | 6.162441  | 9.319499  | 11.107775 |
| S | 0.220713  | 9.319499  | 11.106979 |
| S | 9.568262  | 9.319499  | 10.903307 |
| H | 3.192905  | 9.319500  | 10.320208 |

|                |           |           |           |
|----------------|-----------|-----------|-----------|
| H <sup>+</sup> |           |           |           |
| Mo             | 3.238507  | 9.208822  | 0.960277  |
| Mo             | 9.618697  | 9.419528  | 0.960962  |
| Mo             | -0.032375 | 9.210112  | 0.964743  |
| Mo             | 6.343285  | 9.416895  | 0.967854  |
| Mo             | 11.171201 | 9.316922  | 3.716796  |
| Mo             | 7.980107  | 9.317070  | 3.710805  |
| Mo             | 1.601179  | 9.317742  | 3.718375  |
| Mo             | 4.784665  | 9.316374  | 3.719412  |
| Mo             | 9.578892  | 9.320161  | 6.465170  |
| Mo             | -0.000223 | 9.331951  | 6.483981  |
| Mo             | 6.383634  | 9.321696  | 6.458072  |
| Mo             | 3.194181  | 9.322907  | 6.492683  |
| Mo             | 4.996489  | 9.329208  | 9.173535  |
| Mo             | 1.432716  | 9.343676  | 9.152459  |
| Mo             | 11.310980 | 9.362936  | 9.256147  |
| Mo             | 7.788636  | 9.328601  | 9.251461  |
| S              | 1.601819  | 7.786021  | -0.075154 |
| S              | 4.791752  | 7.762954  | 0.048155  |
| S              | 11.174674 | 7.761628  | 0.051045  |
| S              | 1.602871  | 10.840623 | -0.254748 |
| S              | 7.980442  | 8.149555  | -0.252252 |
| S              | 7.978521  | 10.845793 | -0.066826 |
| S              | 4.791908  | 10.867021 | 0.052098  |
| S              | 11.171262 | 10.868473 | 0.050295  |
| S              | 3.192071  | 10.850942 | 2.734496  |
| S              | 0.012728  | 7.724846  | 2.842515  |
| S              | 6.385666  | 10.905642 | 2.840894  |
| S              | 9.574317  | 7.779686  | 2.739602  |
| S              | 6.385253  | 7.775785  | 2.747888  |
| S              | 3.189130  | 7.725769  | 2.837666  |
| S              | 9.572426  | 10.905430 | 2.833821  |
| S              | 0.012487  | 10.854821 | 2.740447  |
| S              | 1.607563  | 7.769099  | 5.574158  |
| S              | 7.989344  | 10.878814 | 5.545913  |
| S              | 4.767582  | 7.759545  | 5.557076  |
| S              | 1.612759  | 10.874355 | 5.553410  |
| S              | 11.168292 | 7.760320  | 5.553994  |
| S              | 7.990279  | 7.755864  | 5.543480  |
| S              | 4.764665  | 10.880149 | 5.549875  |
| S              | 11.167297 | 10.886995 | 5.544054  |
| S              | 3.205970  | 7.827682  | 8.460601  |
| S              | -0.020973 | 11.002626 | 8.265250  |
| S              | 6.413102  | 7.683047  | 8.241887  |
| S              | -0.027578 | 7.699805  | 8.315675  |
| S              | 6.405726  | 10.973782 | 8.232930  |
| S              | 9.568672  | 7.841188  | 8.382460  |
| S              | 9.550476  | 10.827390 | 8.363549  |
| S              | 3.208220  | 10.836920 | 8.448676  |
| S              | 6.217425  | 9.334762  | 11.107498 |
| S              | 0.158060  | 9.881466  | 11.171413 |
| S              | 9.604555  | 9.281844  | 10.921020 |
| H              | 0.228930  | 8.716823  | 11.865969 |

|                |           |           |           |
|----------------|-----------|-----------|-----------|
| O <sup>+</sup> |           |           |           |
| Mo             | 3.221406  | 9.319500  | 0.943636  |
| Mo             | 9.606142  | 9.319500  | 0.963818  |
| Mo             | -0.047391 | 9.319500  | 0.955365  |
| Mo             | 6.346889  | 9.319500  | 0.953594  |
| Mo             | 11.161263 | 9.319500  | 3.721201  |
| Mo             | 7.974205  | 9.319500  | 3.705270  |
| Mo             | 1.588600  | 9.319500  | 3.681161  |
| Mo             | 4.787593  | 9.319500  | 3.683925  |
| Mo             | 9.570103  | 9.319500  | 6.476561  |
| Mo             | 0.010839  | 9.319500  | 6.467930  |
| Mo             | 6.370562  | 9.319500  | 6.453358  |
| Mo             | 3.192842  | 9.319499  | 6.401533  |
| Mo             | 4.860239  | 9.319499  | 9.221620  |
| Mo             | 1.590275  | 9.319499  | 9.262119  |
| Mo             | 11.296194 | 9.319499  | 9.280942  |
| Mo             | 7.788145  | 9.319500  | 9.268806  |
| S              | 1.584130  | 7.956929  | -0.161022 |
| S              | 4.786531  | 7.774450  | 0.035483  |
| S              | 11.155320 | 7.763463  | 0.053531  |
| S              | 1.584130  | 10.682070 | -0.161022 |
| S              | 7.979172  | 7.954236  | -0.152793 |
| S              | 7.979172  | 10.684763 | -0.152793 |
| S              | 4.786531  | 10.864549 | 0.035483  |
| S              | 11.155320 | 10.875536 | 0.053531  |
| S              | 3.185671  | 10.886278 | 2.764630  |
| S              | -0.009422 | 7.751156  | 2.781557  |

|   |           |           |           |
|---|-----------|-----------|-----------|
| S | 6.387093  | 10.888885 | 2.775624  |
| S | 9.568366  | 7.753459  | 2.792893  |
| S | 6.387093  | 7.750114  | 2.775624  |
| S | 3.185671  | 7.752721  | 2.764630  |
| S | 9.568366  | 10.885540 | 2.792893  |
| S | -0.009422 | 10.887843 | 2.781557  |
| S | 1.590292  | 7.757058  | 5.514940  |
| S | 7.980671  | 10.877362 | 5.551169  |
| S | 4.788923  | 7.753743  | 5.509910  |
| S | 1.590292  | 10.881942 | 5.514941  |
| S | 11.161062 | 7.757385  | 5.564683  |
| S | 7.980671  | 7.761637  | 5.551169  |
| S | 4.788923  | 10.885257 | 5.509910  |
| S | 11.161062 | 10.881614 | 5.564683  |
| S | 3.203954  | 7.762871  | 8.248862  |
| S | 0.041794  | 10.913822 | 8.305348  |
| S | 6.347524  | 7.708398  | 8.276414  |
| S | 0.041794  | 7.725177  | 8.305347  |
| S | 6.347524  | 10.930601 | 8.276415  |
| S | 9.555733  | 7.815886  | 8.383881  |
| S | 9.555733  | 10.823113 | 8.383880  |
| S | 3.203954  | 10.876128 | 8.248863  |
| S | 6.258862  | 9.319499  | 11.100740 |
| S | 0.095958  | 9.319499  | 11.086728 |
| S | 9.555057  | 9.319499  | 10.940910 |
| O | 3.179829  | 9.319500  | 10.410389 |

|                             |           |           |           |
|-----------------------------|-----------|-----------|-----------|
| H <sub>2</sub> <sup>+</sup> |           |           |           |
| Mo                          | 3.232826  | 9.268867  | 0.849690  |
| Mo                          | 9.611333  | 9.280687  | 0.846848  |
| Mo                          | -0.035435 | 9.360522  | 0.855330  |
| Mo                          | 6.334217  | 9.374759  | 0.857808  |
| Mo                          | 11.167149 | 9.320339  | 3.607775  |
| Mo                          | 7.971831  | 9.320741  | 3.602952  |
| Mo                          | 1.601123  | 9.320602  | 3.616231  |
| Mo                          | 4.781770  | 9.320663  | 3.623643  |
| Mo                          | 9.571631  | 9.321120  | 6.354683  |
| Mo                          | -0.000282 | 9.319736  | 6.373045  |
| Mo                          | 6.379941  | 9.321883  | 6.375455  |
| Mo                          | 3.193866  | 9.320660  | 6.396611  |
| Mo                          | 5.021964  | 9.324551  | 9.071171  |
| Mo                          | 1.364150  | 9.316892  | 9.069886  |
| Mo                          | 11.333993 | 9.318902  | 9.141043  |
| Mo                          | 7.808186  | 9.324981  | 9.142242  |
| S                           | 1.574080  | 7.958341  | -0.268380 |
| S                           | 4.749254  | 7.769448  | -0.061938 |
| S                           | 11.137719 | 7.763128  | -0.051708 |
| S                           | 1.619720  | 10.665440 | -0.276324 |
| S                           | 7.948003  | 7.979852  | -0.275724 |
| S                           | 7.991779  | 10.867188 | -0.259150 |
| S                           | 4.816201  | 10.884227 | -0.045697 |
| S                           | 11.199070 | 10.881206 | -0.045229 |
| S                           | 3.195218  | 10.872956 | 2.657618  |
| S                           | 0.005566  | 7.763133  | 2.666913  |
| S                           | 6.382208  | 10.895357 | 2.715637  |
| S                           | 9.562764  | 7.753191  | 2.694997  |
| S                           | 6.372007  | 7.765950  | 2.661404  |
| S                           | 3.184522  | 7.751447  | 2.708124  |
| S                           | 9.572396  | 10.874599 | 2.657321  |
| S                           | 0.013652  | 10.892355 | 2.706351  |
| S                           | 1.619470  | 7.769781  | 5.459982  |
| S                           | 7.981538  | 10.879089 | 5.438555  |
| S                           | 4.763047  | 7.765403  | 5.462304  |
| S                           | 1.622866  | 10.871999 | 5.458770  |
| S                           | 11.158820 | 7.758382  | 5.437966  |
| S                           | 7.978381  | 7.763420  | 5.439030  |
| S                           | 4.759899  | 10.876591 | 5.461370  |
| S                           | 11.158437 | 10.882263 | 5.437932  |
| S                           | 3.194987  | 7.823559  | 8.394651  |
| S                           | -0.030704 | 10.977882 | 8.140991  |
| S                           | 6.417738  | 7.664469  | 8.142719  |
| S                           | -0.032053 | 7.660010  | 8.136166  |
| S                           | 6.418179  | 10.983522 | 8.139744  |
| S                           | 9.569160  | 7.825277  | 8.262494  |
| S                           | 9.572707  | 10.819098 | 8.261175  |
| S                           | 3.190788  | 10.818605 | 8.394096  |
| S                           | 6.218612  | 9.324839  | 10.997309 |
| S                           | 0.163936  | 9.294905  | 10.995579 |
| S                           | 9.571189  | 9.334416  | 10.793269 |
| H                           | 2.749055  | 9.307830  | 12.964251 |
| H                           | 3.499347  | 9.341186  | 12.931390 |

|                              |           |           |           |
|------------------------------|-----------|-----------|-----------|
| CO <sub>2</sub> <sup>+</sup> |           |           |           |
| Mo                           | 3.227492  | 9.382119  | 0.906751  |
| Mo                           | 9.606569  | 9.372799  | 0.919868  |
| Mo                           | -0.044711 | 9.274494  | 0.920900  |
| Mo                           | 6.334079  | 9.264973  | 0.920497  |
| Mo                           | 11.159870 | 9.320702  | 3.683819  |
| Mo                           | 7.961116  | 9.318425  | 3.678007  |
| Mo                           | 1.590765  | 9.324401  | 3.678717  |
| Mo                           | 4.773593  | 9.322580  | 3.681739  |
| Mo                           | 9.556520  | 9.315587  | 6.428928  |
| Mo                           | -0.004977 | 9.319500  | 6.449038  |
| Mo                           | 6.358250  | 9.314289  | 6.449785  |
| Mo                           | 3.180600  | 9.319322  | 6.447442  |
| Mo                           | 5.004547  | 9.308931  | 9.161189  |
| Mo                           | 1.341764  | 9.319586  | 9.161523  |
| Mo                           | 11.131812 | 9.321149  | 9.198222  |
| Mo                           | 7.791254  | 9.312493  | 9.199637  |
| S                            | 1.614942  | 7.976731  | -0.212479 |
| S                            | 4.819858  | 7.761623  | 0.016030  |
| S                            | 11.197410 | 7.762496  | 0.024046  |
| S                            | 1.561500  | 10.685540 | -0.206006 |
| S                            | 7.997819  | 7.958730  | -0.195825 |
| S                            | 7.944231  | 10.666460 | -0.210954 |
| S                            | 4.747008  | 10.876951 | 0.004275  |
| S                            | 11.120817 | 10.882792 | 0.020268  |

|   |           |           |           |
|---|-----------|-----------|-----------|
| S | 3.175318  | 10.892891 | 2.767025  |
| S | 0.005159  | 7.751306  | 2.776772  |
| S | 6.369592  | 10.875173 | 2.725392  |
| S | 9.565563  | 7.769992  | 2.729428  |
| S | 6.376740  | 7.747524  | 2.780034  |
| S | 3.184185  | 7.773796  | 2.710504  |
| S | 9.553210  | 10.887986 | 2.779657  |
| S | -0.008919 | 10.879697 | 2.730154  |
| S | 1.610910  | 7.768371  | 5.513749  |
| S | 7.960302  | 10.873490 | 5.515508  |
| S | 4.747245  | 7.762991  | 5.514414  |
| S | 1.606325  | 10.873405 | 5.521639  |
| S | 11.151282 | 7.758089  | 5.513580  |
| S | 7.963946  | 7.758945  | 5.511800  |
| S | 4.753546  | 10.875189 | 5.521688  |
| S | 11.149289 | 10.879340 | 5.516956  |
| S | 3.170266  | 7.827493  | 8.429385  |
| S | -0.036534 | 10.979572 | 8.209835  |
| S | 6.386296  | 7.650675  | 8.212966  |
| S | -0.037510 | 7.660171  | 8.213527  |
| S | 6.384536  | 10.971239 | 8.215885  |
| S | 9.553665  | 7.812416  | 8.323782  |
| S | 9.548353  | 10.817420 | 8.324396  |
| S | 3.176591  | 10.803266 | 8.450866  |
| S | 6.270432  | 9.348171  | 11.066026 |
| S | 0.067577  | 9.374877  | 11.061690 |
| S | 9.548461  | 9.309501  | 10.848529 |
| C | 3.360279  | 9.293496  | 12.692907 |
| O | 3.157646  | 9.063869  | 11.551208 |
| O | 3.558156  | 9.517674  | 13.823795 |

| HCOO <sup>+</sup> |           |           |           |
|-------------------|-----------|-----------|-----------|
| Mo                | 3.224865  | 9.492189  | 1.002748  |
| Mo                | 9.581630  | 9.322843  | 0.993839  |
| Mo                | -0.021643 | 9.478074  | 1.005455  |
| Mo                | 6.327079  | 9.297015  | 0.998809  |
| Mo                | 11.163863 | 9.297919  | 3.714136  |
| Mo                | 7.965517  | 9.293104  | 3.713506  |
| Mo                | 1.595764  | 9.298870  | 3.731228  |
| Mo                | 4.770811  | 9.293439  | 3.747097  |
| Mo                | 9.567461  | 9.190488  | 6.449600  |
| Mo                | 0.004337  | 9.187394  | 6.466552  |
| Mo                | 6.366938  | 9.189860  | 6.470150  |
| Mo                | 3.189601  | 9.214925  | 6.525350  |
| Mo                | 5.035074  | 9.170008  | 9.297905  |
| Mo                | 1.346715  | 9.167307  | 9.295976  |
| Mo                | 11.286837 | 9.008121  | 9.201532  |
| Mo                | 7.846663  | 9.011083  | 9.202272  |
| S                 | 1.599510  | 8.235810  | -0.242202 |
| S                 | 4.787944  | 7.891691  | 0.008446  |
| S                 | 11.160234 | 7.942772  | -0.028584 |
| S                 | 1.594880  | 10.946796 | 0.012875  |
| S                 | 7.962576  | 7.930721  | -0.102874 |
| S                 | 7.951122  | 10.651675 | -0.146083 |
| S                 | 4.764552  | 10.969819 | 0.126838  |
| S                 | 11.159440 | 10.930973 | 0.091388  |
| S                 | 3.183140  | 10.917659 | 9.292361  |
| S                 | 0.006785  | 7.779688  | 2.714136  |
| S                 | 6.361876  | 10.874337 | 9.282789  |
| S                 | 9.562528  | 7.738462  | 2.781964  |
| S                 | 6.366620  | 7.734266  | 2.810807  |
| S                 | 3.184339  | 7.785343  | 2.714441  |
| S                 | 9.560777  | 10.884356 | 9.282716  |
| S                 | 0.006112  | 10.925599 | 2.911438  |
| S                 | 1.627298  | 7.675083  | 5.522335  |
| S                 | 7.972200  | 10.784682 | 5.601340  |
| S                 | 4.744548  | 7.668196  | 5.535358  |
| S                 | 1.610877  | 10.789696 | 5.635092  |
| S                 | 11.165378 | 7.665753  | 5.484078  |
| S                 | 7.968010  | 7.668342  | 5.492107  |
| S                 | 4.765242  | 10.795190 | 5.636008  |
| S                 | 11.154846 | 10.788568 | 5.606100  |
| S                 | 3.191034  | 7.743192  | 8.532118  |
| S                 | -0.074053 | 10.753431 | 8.334473  |
| S                 | 6.330261  | 7.480533  | 8.179889  |
| S                 | 0.048639  | 7.479597  | 8.176900  |
| S                 | 6.452982  | 10.757694 | 8.337121  |
| S                 | 9.566504  | 7.541497  | 8.229484  |
| S                 | 9.568705  | 10.612733 | 8.419553  |
| S                 | 3.189290  | 10.677397 | 8.449780  |
| S                 | 6.508469  | 8.481362  | 11.022516 |
| S                 | -0.125950 | 8.477559  | 11.019469 |
| S                 | 9.569102  | 8.981775  | 10.886630 |
| C                 | 3.191488  | 10.456533 | 11.533140 |
| O                 | 0.058347  | 10.094759 | 11.098267 |
| O                 | 4.327247  | 10.102979 | 11.098224 |
| H                 | 3.189091  | 11.135755 | 12.405833 |

|   |           |           |           |
|---|-----------|-----------|-----------|
| S | 11.161430 | 8.009753  | -0.103170 |
| S | 1.588466  | 10.916417 | -0.000833 |
| S | 7.933580  | 7.885994  | -0.062974 |
| S | 7.911236  | 10.622596 | -0.159726 |
| S | 4.745963  | 10.955447 | 0.111644  |
| S | 11.127405 | 10.795462 | -0.044566 |
| S | 3.169990  | 10.930333 | 2.916310  |
| S | 0.002119  | 7.768732  | 2.736060  |
| S | 6.346270  | 10.877719 | 2.814976  |
| S | 9.544460  | 7.736316  | 2.772862  |
| S | 6.345968  | 7.740434  | 2.846977  |
| S | 3.174797  | 7.797624  | 2.736489  |
| S | 9.536251  | 10.898253 | 2.805164  |
| S | -0.013037 | 10.934099 | 2.859205  |
| S | 1.605468  | 7.711711  | 5.526613  |
| S | 7.947990  | 10.829671 | 5.578308  |
| S | 4.726384  | 7.706207  | 5.558706  |
| S | 1.590048  | 10.830150 | 5.613052  |
| S | 11.139903 | 7.701947  | 5.478504  |
| S | 7.945565  | 7.704089  | 5.511584  |
| S | 4.742422  | 10.839679 | 5.632060  |
| S | 11.140749 | 10.827376 | 5.557935  |
| S | 3.176257  | 7.765478  | 8.488285  |
| S | -0.054039 | 10.841763 | 8.286796  |
| S | 6.340425  | 7.550740  | 8.219483  |
| S | -0.009624 | 7.529397  | 8.180478  |
| S | 6.392445  | 10.839581 | 8.314257  |
| S | 9.543357  | 7.656478  | 8.251028  |
| S | 9.560919  | 10.701386 | 8.363087  |
| S | 3.189265  | 10.708792 | 8.491980  |
| S | 6.524565  | 8.889824  | 11.096113 |
| S | -0.107549 | 8.779012  | 11.068810 |
| S | 9.585282  | 9.148075  | 10.855327 |
| C | 2.612280  | 9.654346  | 11.003400 |
| O | 3.848247  | 9.363915  | 11.055296 |
| O | 2.196862  | 10.328334 | 12.074259 |
| H | 1.208952  | 10.356428 | 12.035586 |

# CHO\*

|    |           |           |           |
|----|-----------|-----------|-----------|
| Mo | 3.204353  | 9.224342  | 0.968103  |
| Mo | 9.584494  | 9.421462  | 0.930729  |
| Mo | -0.053471 | 9.220598  | 0.955463  |
| Mo | 6.302899  | 9.419780  | 0.952014  |
| Mo | 11.145553 | 9.336081  | 3.676680  |
| Mo | 7.948308  | 9.333543  | 3.667744  |
| Mo | 1.576200  | 9.336282  | 3.729591  |
| Mo | 4.753053  | 9.336319  | 3.729014  |
| Mo | 9.542778  | 9.349848  | 6.396069  |
| Mo | -0.033505 | 9.332168  | 6.456962  |
| Mo | 6.363324  | 9.321740  | 6.436101  |
| Mo | 3.172632  | 9.345566  | 6.524374  |
| Mo | 5.045202  | 9.329470  | 9.268297  |
| Mo | 1.245204  | 9.329850  | 9.305379  |
| Mo | 11.067786 | 9.326946  | 9.174823  |
| Mo | 7.998464  | 9.307433  | 9.160015  |
| S  | 1.579576  | 7.786706  | -0.064415 |
| S  | 4.746501  | 7.764863  | 0.052582  |
| S  | 11.152289 | 7.771498  | 0.032307  |
| S  | 1.578982  | 10.487587 | -0.264350 |
| S  | 7.937168  | 8.130767  | -0.253770 |
| S  | 7.936277  | 10.823625 | -0.117255 |
| S  | 4.753083  | 10.867443 | 0.028934  |
| S  | 11.145612 | 10.856457 | 0.005462  |
| S  | 3.161593  | 10.870691 | 2.747506  |
| S  | -0.003603 | 7.740925  | 2.834794  |
| S  | 6.343669  | 10.918610 | 2.817003  |
| S  | 9.546471  | 7.790059  | 2.706269  |
| S  | 6.340951  | 7.789477  | 2.736211  |
| S  | 3.159575  | 7.745321  | 2.852420  |
| S  | 9.542324  | 10.922255 | 2.787569  |
| S  | -0.004550 | 10.873295 | 2.724301  |
| S  | 1.599336  | 7.782018  | 5.591332  |
| S  | 7.939738  | 10.899008 | 5.492791  |
| S  | 4.737925  | 7.772607  | 5.573122  |
| S  | 1.592476  | 10.896404 | 5.581459  |
| S  | 11.139277 | 7.775376  | 5.500806  |
| S  | 7.953629  | 7.769681  | 5.487864  |
| S  | 4.743776  | 10.897805 | 5.574113  |
| S  | 11.152560 | 10.905663 | 5.496146  |
| S  | 3.140640  | 7.894435  | 8.525989  |
| S  | -0.115860 | 10.941986 | 8.291065  |
| S  | 6.414513  | 7.680588  | 8.237350  |
| S  | -0.090292 | 7.698128  | 8.256732  |
| S  | 6.433181  | 10.943948 | 8.276444  |
| S  | 9.543371  | 7.746931  | 8.235557  |
| S  | 9.527315  | 10.948933 | 8.226296  |
| S  | 3.140026  | 10.805043 | 8.503394  |
| S  | 6.501749  | 8.968398  | 11.027751 |
| S  | -0.244430 | 9.007276  | 11.054078 |
| S  | 9.504904  | 9.689079  | 10.964085 |
| C  | 3.761591  | 9.513340  | 11.021739 |
| O  | 2.499559  | 9.469365  | 11.042697 |
| H  | 4.185894  | 9.653927  | 12.041632 |

# COH\*

|    |           |          |          |
|----|-----------|----------|----------|
| Mo | 3.206758  | 9.316486 | 0.994208 |
| Mo | 9.585398  | 9.334575 | 0.959688 |
| Mo | -0.056822 | 9.218401 | 0.979360 |
| Mo | 6.304113  | 9.227004 | 0.983071 |
| Mo | 11.136348 | 9.339276 | 3.721538 |
| Mo | 7.950436  | 9.341038 | 3.717751 |
| Mo | 1.574098  | 9.326034 | 3.765022 |
| Mo | 4.756155  | 9.329775 | 3.769766 |
| Mo | 9.543129  | 9.397366 | 6.468930 |
| Mo | -0.046163 | 9.419413 | 6.488800 |
| Mo | 6.370791  | 9.423240 | 6.487987 |
| Mo | 3.165390  | 9.390028 | 6.558025 |

|    |           |           |           |
|----|-----------|-----------|-----------|
| Mo | 5.018763  | 9.459712  | 9.239580  |
| Mo | 1.300098  | 9.452664  | 9.260508  |
| Mo | 11.061112 | 9.474683  | 9.260389  |
| Mo | 8.015849  | 9.470145  | 9.262310  |
| S  | 1.604000  | 7.886337  | -0.107815 |
| S  | 4.791778  | 7.689192  | 0.123142  |
| S  | 11.183301 | 7.703820  | 0.095176  |
| S  | 1.555705  | 10.599159 | -0.165234 |
| S  | 7.965757  | 7.912626  | -0.130537 |
| S  | 7.912112  | 10.619372 | -0.166805 |
| S  | 4.711948  | 10.818345 | 0.064000  |
| S  | 11.114470 | 10.815748 | 0.037488  |
| S  | 3.156617  | 10.874421 | 2.823592  |
| S  | -0.011689 | 7.742447  | 2.872596  |
| S  | 6.336114  | 10.867186 | 2.758063  |
| S  | 9.545378  | 7.766307  | 2.793841  |
| S  | 6.356522  | 7.748012  | 2.873326  |
| S  | 3.167883  | 7.755258  | 2.845391  |
| S  | 9.536828  | 10.894040 | 2.777792  |
| S  | -0.009593 | 10.862836 | 2.753921  |
| S  | 1.571408  | 7.820113  | 5.657531  |
| S  | 7.955281  | 10.949714 | 5.506211  |
| S  | 4.758312  | 7.919837  | 5.656820  |
| S  | 1.592587  | 10.928428 | 5.569341  |
| S  | 11.134785 | 7.820906  | 5.581557  |
| S  | 7.946854  | 8.727203  | 5.580649  |
| S  | 4.732942  | 10.935027 | 5.570535  |
| S  | 11.129686 | 10.950081 | 5.506370  |
| S  | 3.162186  | 7.874693  | 8.597276  |
| S  | -0.107751 | 11.094223 | 8.280450  |
| S  | 6.463884  | 7.846244  | 8.341280  |
| S  | -0.139744 | 7.847936  | 8.347018  |
| S  | 6.439599  | 11.102283 | 8.285744  |
| S  | 9.538963  | 7.838005  | 8.343951  |
| S  | 9.539649  | 11.027914 | 8.291260  |
| S  | 3.157504  | 10.930943 | 8.417194  |
| S  | 6.298535  | 9.605558  | 11.120318 |
| S  | 0.003226  | 9.643757  | 11.112694 |
| S  | 9.537176  | 9.201032  | 11.076326 |
| C  | 3.169747  | 8.981471  | 10.308457 |
| O  | 3.142976  | 8.297343  | 11.463866 |
| H  | 4.061982  | 8.150505  | 11.787755 |

# CH<sub>2</sub>O\*

|    |           |           |           |
|----|-----------|-----------|-----------|
| Mo | 3.229259  | 9.362853  | 0.966261  |
| Mo | 9.598132  | 9.370221  | 0.925783  |
| Mo | -0.038502 | 9.268921  | 0.941596  |
| Mo | 6.318395  | 9.277767  | 0.956514  |
| Mo | 11.146910 | 9.318067  | 3.673602  |
| Mo | 7.953868  | 9.316132  | 3.685665  |
| Mo | 1.588353  | 9.321087  | 3.730149  |
| Mo | 4.768367  | 9.319737  | 3.754838  |
| Mo | 9.548632  | 9.318885  | 6.419275  |
| Mo | -0.032845 | 9.319101  | 6.432356  |
| Mo | 6.356199  | 9.318686  | 6.482035  |
| Mo | 3.159987  | 9.319402  | 6.519735  |
| Mo | 5.052030  | 9.318923  | 9.348324  |
| Mo | 1.238756  | 9.319742  | 9.297404  |
| Mo | 11.019107 | 9.319591  | 9.177838  |
| Mo | 8.099494  | 9.318874  | 9.204141  |
| S  | 1.627211  | 7.960909  | -0.168639 |
| S  | 4.805240  | 7.751371  | 0.069760  |
| S  | 11.199652 | 7.762380  | 0.035631  |
| S  | 1.580214  | 10.673410 | -0.167464 |
| S  | 7.972187  | 7.972050  | -0.184309 |
| S  | 7.928628  | 10.677087 | -0.180894 |
| S  | 4.737868  | 10.890281 | 0.072174  |
| S  | 11.125983 | 10.876193 | 0.034698  |
| S  | 3.177707  | 10.886027 | 2.828812  |
| S  | 0.012283  | 7.749678  | 2.797575  |
| S  | 6.350738  | 10.873903 | 2.772287  |
| S  | 9.552231  | 7.761975  | 2.722927  |
| S  | 6.356269  | 7.749580  | 2.812568  |
| S  | 3.185388  | 7.768461  | 2.786488  |
| S  | 9.540970  | 10.890337 | 2.775432  |
| S  | -0.000496 | 10.872954 | 2.749029  |
| S  | 1.592074  | 7.756403  | 5.573579  |
| S  | 7.938555  | 10.873617 | 5.513951  |
| S  | 4.742043  | 7.752963  | 5.603906  |
| S  | 1.589922  | 10.883051 | 5.574922  |
| S  | 11.139651 | 7.754483  | 5.490386  |
| S  | 7.940922  | 7.762446  | 5.515568  |
| S  | 4.744211  | 10.885419 | 5.604774  |
| S  | 11.141866 | 10.882820 | 5.490152  |
| S  | 3.150579  | 7.894698  | 8.520229  |
| S  | -0.106666 | 10.937613 | 8.265103  |
| S  | 6.430937  | 7.704496  | 8.322699  |
| S  | -0.106586 | 7.701668  | 8.266242  |
| S  | 6.430195  | 10.933417 | 8.322640  |
| S  | 9.550113  | 7.687046  | 8.245034  |
| S  | 9.548899  | 10.951114 | 8.245309  |
| S  | 3.150945  | 10.743616 | 8.520394  |
| S  | 6.661811  | 9.320750  | 11.073382 |
| S  | -0.223963 | 9.322067  | 11.068510 |
| S  | 9.592663  | 9.315130  | 11.037394 |
| C  | 2.547354  | 9.318258  | 11.098020 |
| O  | 3.919704  | 9.318959  | 10.901250 |
| H  | 2.279566  | 10.214053 | 11.687332 |
| H  | 2.279846  | 8.419795  | 11.684202 |

# CHOH\*

|    |           |          |          |
|----|-----------|----------|----------|
| Mo | 3.249462  | 9.204375 | 0.943456 |
| Mo | 9.630668  | 9.406993 | 0.956863 |
| Mo | -0.018189 | 9.215428 | 0.957326 |
| Mo | 6.358124  | 9.410776 | 0.951237 |
| Mo | 11.188139 | 9.326908 | 3.717267 |
| Mo | 7.995241  | 9.319359 | 3.696196 |

|    |           |           |           |
|----|-----------|-----------|-----------|
| Mo | 1.616601  | 9.321298  | 3.695461  |
| Mo | 4.798417  | 9.314625  | 3.694359  |
| Mo | 9.591559  | 9.335704  | 6.458529  |
| Mo | 0.029851  | 9.331118  | 6.460373  |
| Mo | 6.393504  | 9.327754  | 6.436448  |
| Mo | 3.197677  | 9.335317  | 6.462841  |
| Mo | 4.995269  | 9.355903  | 9.148018  |
| Mo | 1.589341  | 9.337014  | 9.283894  |
| Mo | 11.363941 | 9.332190  | 9.262798  |
| Mo | 7.796432  | 9.348015  | 9.228567  |
| S  | 1.608972  | 7.785568  | -0.087506 |
| S  | 4.799984  | 7.755903  | 0.030701  |
| S  | 11.185608 | 7.762499  | 0.038236  |
| S  | 1.613543  | 10.480661 | -0.268516 |
| S  | 7.996953  | 8.124464  | -0.248304 |
| S  | 7.997525  | 10.820700 | -0.096776 |
| S  | 4.812258  | 10.849000 | 0.014917  |
| S  | 11.182327 | 10.855031 | 0.030136  |
| S  | 3.207912  | 10.853294 | 2.710301  |
| S  | 0.021119  | 7.730280  | 2.834591  |
| S  | 6.400265  | 10.903884 | 2.819009  |
| S  | 9.596188  | 7.778950  | 2.744013  |
| S  | 6.402151  | 7.773509  | 2.731262  |
| S  | 3.201367  | 7.723434  | 2.820143  |
| S  | 9.588846  | 10.906486 | 2.821243  |
| S  | 0.026037  | 10.862951 | 2.728649  |
| S  | 1.620593  | 7.771162  | 5.545210  |
| S  | 8.000105  | 10.886720 | 5.528343  |
| S  | 4.783615  | 7.766509  | 5.537167  |
| S  | 1.621626  | 10.890683 | 5.521647  |
| S  | 11.176412 | 7.764830  | 5.557911  |
| S  | 8.005223  | 7.768053  | 5.535735  |
| S  | 4.781317  | 10.883203 | 5.518203  |
| S  | 11.188701 | 10.900116 | 5.550599  |
| S  | 3.247217  | 8.14165   | 8.393957  |
| S  | 0.082253  | 10.943417 | 8.302508  |
| S  | 6.412927  | 7.693918  | 8.237120  |
| S  | 0.047941  | 7.722768  | 8.283769  |
| S  | 6.421710  | 10.990044 | 8.207021  |
| S  | 9.585195  | 7.848013  | 8.373080  |
| S  | 9.591664  | 10.832267 | 8.366423  |
| S  | 3.257796  | 10.893849 | 8.354567  |
| S  | 6.224344  | 9.377099  | 11.083254 |
| S  | 0.036814  | 9.053438  | 11.096971 |
| S  | 9.561996  | 9.365982  | 10.888135 |
| C  | 2.738567  | 9.690755  | 11.022681 |
| O  | 2.881361  | 9.931905  | 12.107098 |
| H  | 2.379011  | 8.092298  | 12.003364 |
| H  | 3.204725  | 10.668479 | 11.226443 |

| CH*               |           |           |           |
|-------------------|-----------|-----------|-----------|
| Mo                | 3.229776  | 9.198595  | 0.963403  |
| Mo                | 9.614262  | 9.428107  | 0.927718  |
| Mo                | -0.034851 | 9.196883  | 0.952253  |
| Mo                | 6.324668  | 9.427370  | 0.944721  |
| Mo                | 11.162028 | 9.333713  | 3.690150  |
| Mo                | 7.970946  | 9.336129  | 3.670725  |
| Mo                | 1.597706  | 9.325114  | 3.738249  |
| Mo                | 4.776379  | 9.328479  | 3.725517  |
| Mo                | 9.563917  | 9.354779  | 6.423393  |
| Mo                | -0.007258 | 9.349294  | 6.465902  |
| Mo                | 6.393302  | 9.379379  | 6.442236  |
| Mo                | 3.178662  | 9.369172  | 6.522112  |
| Mo                | 5.067533  | 9.460824  | 9.191640  |
| Mo                | 1.464935  | 9.404648  | 9.229327  |
| Mo                | 10.990579 | 9.384306  | 9.182399  |
| Mo                | 8.005398  | 9.423023  | 9.198098  |
| S                 | 1.601234  | 7.754758  | -0.056920 |
| S                 | 4.775460  | 7.749027  | 0.056997  |
| S                 | 11.174021 | 7.750184  | 0.043830  |
| S                 | 1.602768  | 10.449040 | -0.281660 |
| S                 | 7.964531  | 8.162526  | -0.281122 |
| S                 | 7.964844  | 10.849126 | -0.100645 |
| S                 | 4.769792  | 10.870097 | 0.039096  |
| S                 | 11.175892 | 10.863801 | 0.020420  |
| S                 | 3.178137  | 10.851515 | 2.736380  |
| S                 | 0.011452  | 7.732949  | 2.847217  |
| S                 | 6.364477  | 10.917233 | 2.813460  |
| S                 | 9.564947  | 7.793730  | 2.709220  |
| S                 | 6.370394  | 7.791581  | 2.730274  |
| S                 | 3.182818  | 7.730351  | 2.859386  |
| S                 | 9.567344  | 10.920681 | 2.790627  |
| S                 | 0.019389  | 10.853566 | 2.720390  |
| S                 | 1.607878  | 7.781226  | 5.611167  |
| S                 | 7.980536  | 10.914403 | 5.477184  |
| S                 | 4.766484  | 7.799986  | 5.594266  |
| S                 | 1.595078  | 10.911933 | 5.562157  |
| S                 | 11.165148 | 7.783101  | 5.526820  |
| S                 | 7.964285  | 7.792675  | 5.506686  |
| S                 | 4.747663  | 10.914665 | 5.541556  |
| S                 | 11.176169 | 10.909081 | 5.506748  |
| S                 | 3.273025  | 7.931240  | 8.515558  |
| S                 | -0.079899 | 10.958899 | 8.319623  |
| S                 | 6.472704  | 7.803865  | 8.300802  |
| S                 | -0.130234 | 7.798766  | 8.360179  |
| S                 | 6.478247  | 11.052129 | 8.196906  |
| S                 | 9.513591  | 7.768756  | 8.257472  |
| S                 | 9.541233  | 10.985672 | 8.234854  |
| S                 | 3.271070  | 10.923730 | 8.432896  |
| S                 | 6.344998  | 9.706606  | 11.052172 |
| S                 | 0.362262  | 9.195620  | 11.343515 |
| S                 | 9.617218  | 9.124808  | 11.025628 |
| C                 | 1.610508  | 10.281959 | 10.986743 |
| H                 | 1.978454  | 11.102729 | 11.606935 |
| CH <sub>2</sub> * |           |           |           |
| Mo                | 3.234888  | 9.311845  | 0.913995  |
| Mo                | 9.613949  | 9.317389  | 0.943723  |
| Mo                | -0.053893 | 9.321116  | 0.933459  |
| Mo                | 6.333196  | 9.326234  | 0.930059  |
| Mo                | 11.162553 | 9.319568  | 3.718786  |
| Mo                | 7.970150  | 9.318517  | 3.715185  |
| Mo                | 1.597872  | 9.319070  | 3.675987  |
| Mo                | 4.779014  | 9.318642  | 3.679065  |
| Mo                | 9.568375  | 9.320354  | 6.466192  |
| Mo                | 0.012147  | 9.318894  | 6.438754  |
| Mo                | 6.361197  | 9.319353  | 6.440001  |
| Mo                | 3.191031  | 9.320960  | 6.443386  |
| Mo                | 4.690837  | 9.328376  | 6.229408  |
| Mo                | 1.682014  | 9.327763  | 6.222755  |
| Mo                | 11.397887 | 9.320736  | 9.273124  |
| Mo                | 7.735556  | 9.321022  | 9.273150  |
| S                 | 1.583753  | 7.961785  | -0.190514 |
| S                 | 4.782472  | 7.745432  | 0.042631  |

| S                 | 11.152904 | 7.743875  | 0.060355  |
|-------------------|-----------|-----------|-----------|
| S                 | 1.585994  | 10.674155 | -0.190125 |
| S                 | 7.976881  | 7.962237  | -0.175828 |
| S                 | 7.979302  | 10.679157 | -0.175949 |
| S                 | 4.795000  | 10.892401 | 0.042441  |
| S                 | 11.156414 | 10.896280 | 0.062443  |
| S                 | 3.185656  | 10.882141 | 2.741461  |
| S                 | -0.003626 | 7.758307  | 2.769077  |
| S                 | 6.386633  | 10.879765 | 2.770523  |
| S                 | 9.563311  | 7.760940  | 2.786588  |
| S                 | 6.385123  | 7.758381  | 2.765102  |
| S                 | 3.184127  | 7.755023  | 2.747403  |
| S                 | 9.563272  | 10.877093 | 2.785375  |
| S                 | -0.002992 | 10.880711 | 2.770319  |
| S                 | 1.602235  | 7.762680  | 5.506077  |
| S                 | 7.973976  | 10.885512 | 5.553800  |
| S                 | 4.776138  | 7.758499  | 5.507036  |
| S                 | 1.601161  | 10.875805 | 5.504609  |
| S                 | 11.157747 | 7.749332  | 5.554310  |
| S                 | 7.974884  | 7.753472  | 5.555348  |
| S                 | 4.776140  | 10.879727 | 5.505044  |
| S                 | 11.158644 | 10.889478 | 5.553606  |
| S                 | 3.187682  | 7.790654  | 8.317712  |
| S                 | 0.065095  | 10.916586 | 8.281769  |
| S                 | 6.307756  | 7.728476  | 8.288777  |
| S                 | 0.065390  | 7.725647  | 8.285837  |
| S                 | 6.309301  | 10.915247 | 8.284599  |
| S                 | 9.566443  | 7.850199  | 8.388800  |
| S                 | 9.566594  | 10.91065  | 8.388345  |
| S                 | 3.188343  | 10.940989 | 8.304017  |
| S                 | 6.215786  | 9.316088  | 11.088375 |
| S                 | 0.157571  | 9.313876  | 11.086052 |
| S                 | 9.566321  | 9.319391  | 10.884030 |
| C                 | 3.183488  | 9.90020   | 10.825964 |
| H                 | 3.178252  | 8.537281  | 11.518441 |
| H                 | 3.178481  | 10.337780 | 11.383362 |
| CH <sub>3</sub> * |           |           |           |
| Mo                | 3.243600  | 9.201242  | 0.964627  |
| Mo                | 9.593063  | 9.387718  | 0.975016  |
| Mo                | -0.003547 | 9.231521  | 0.975513  |
| Mo                | 6.340723  | 9.422086  | 0.970811  |
| Mo                | 11.172220 | 9.311830  | 3.689346  |
| Mo                | 7.979679  | 9.320453  | 3.696167  |
| Mo                | 1.601044  | 9.306694  | 3.695765  |
| Mo                | 4.783912  | 9.316170  | 3.713701  |
| Mo                | 9.570570  | 9.322963  | 6.436380  |
| Mo                | 0.007428  | 9.324002  | 6.442037  |
| Mo                | 6.366371  | 9.325444  | 6.440967  |
| Mo                | 3.200561  | 9.325627  | 6.471368  |
| Mo                | 4.951019  | 9.355301  | 9.268291  |
| Mo                | 1.363661  | 9.348311  | 9.212757  |
| Mo                | 11.325506 | 9.342877  | 9.206940  |
| Mo                | 7.795834  | 9.345270  | 9.217604  |
| S                 | 1.605672  | 7.776353  | -0.054413 |
| S                 | 4.785724  | 7.764886  | 0.040613  |
| S                 | 11.165602 | 7.817282  | -0.001086 |
| S                 | 1.616828  | 10.494758 | -0.241519 |
| S                 | 7.966768  | 8.125617  | -0.234428 |
| S                 | 7.981925  | 10.843418 | -0.051064 |
| S                 | 4.802159  | 10.857287 | 0.036557  |
| S                 | 11.180452 | 10.798883 | -0.004418 |
| S                 | 3.194946  | 10.851411 | 2.728379  |
| S                 | 0.010780  | 7.711572  | 2.824104  |
| S                 | 6.382763  | 10.909764 | 2.842884  |
| S                 | 9.569502  | 7.759228  | 2.746030  |
| S                 | 6.380964  | 7.775331  | 2.740525  |
| S                 | 3.196257  | 7.716566  | 2.839648  |
| S                 | 9.576188  | 10.908183 | 2.817053  |
| S                 | 0.016061  | 10.865241 | 2.742153  |
| S                 | 1.619355  | 7.761691  | 5.554102  |
| S                 | 7.978014  | 10.883086 | 5.535528  |
| S                 | 4.775137  | 7.753585  | 5.551080  |
| S                 | 1.619153  | 10.875756 | 5.526901  |
| S                 | 11.161548 | 7.756658  | 5.533125  |
| S                 | 7.975429  | 7.760273  | 5.535287  |

| S                 | 4.767847  | 10.888919 | 5.538071  |
|-------------------|-----------|-----------|-----------|
| S                 | 11.167696 | 10.881137 | 5.518456  |
| S                 | 3.164656  | 7.852733  | 8.426393  |
| S                 | -0.015299 | 10.986014 | 8.220930  |
| S                 | 6.349491  | 7.710482  | 8.272207  |
| S                 | -0.011694 | 7.690312  | 8.245088  |
| S                 | 6.354463  | 10.971110 | 8.245304  |
| S                 | 9.561487  | 7.834254  | 8.346598  |
| S                 | 9.563683  | 10.839894 | 8.326371  |
| S                 | 3.161385  | 10.835642 | 8.392486  |
| S                 | 6.409731  | 9.347857  | 11.105465 |
| S                 | 0.021843  | 9.342209  | 11.093610 |
| S                 | 9.583554  | 9.353551  | 10.865161 |
| C                 | 3.517543  | 9.421139  | 10.996545 |
| H                 | 3.760050  | 8.563132  | 11.639589 |
| H                 | 3.730478  | 10.366861 | 11.516845 |
| H                 | 2.390001  | 9.399680  | 11.016175 |
| CH <sub>4</sub> * |           |           |           |
| Mo                | 3.244193  | 9.375927  | 0.849476  |
| Mo                | 9.621666  | 9.371461  | 0.850810  |
| Mo                | -0.025712 | 9.271051  | 0.859343  |
| Mo                | 6.350377  | 9.265590  | 0.859083  |
| Mo                | 11.176379 | 9.321511  | 3.631350  |
| Mo                | 7.980640  | 9.320925  | 3.627648  |
| Mo                | 1.611965  | 9.323275  | 3.635448  |
| Mo                | 4.790488  | 9.322133  | 3.640464  |
| Mo                | 9.579711  | 9.328164  | 6.393290  |
| Mo                | 0.012557  | 9.328371  | 6.402110  |
| Mo                | 6.385212  | 9.327925  | 6.406915  |
| Mo                | 3.203347  | 9.328438  | 6.426236  |
| Mo                | 5.027872  | 9.336982  | 9.129645  |
| Mo                | 1.379404  | 9.339395  | 9.125003  |
| Mo                | 11.335878 | 9.341321  | 9.177466  |
| Mo                | 7.825442  | 9.338954  | 9.181331  |
| S                 | 1.630404  | 7.973667  | -0.271144 |
| S                 | 4.834079  | 7.754401  | -0.033664 |
| S                 | 11.211928 | 7.757307  | -0.032798 |
| S                 | 1.581570  | 10.680823 | -0.260327 |
| S                 | 8.009239  | 7.964182  | -0.264382 |
| S                 | 7.958931  | 10.668991 | -0.270016 |
| S                 | 4.762449  | 10.875560 | -0.050541 |
| S                 | 11.142305 | 10.881543 | -0.040617 |
| S                 | 3.194815  | 10.886921 | 2.716376  |
| S                 | 0.025312  | 7.754957  | 2.726336  |
| S                 | 6.384358  | 10.869290 | 2.672487  |
| S                 | 9.580628  | 7.776474  | 2.671085  |
| S                 | 6.394602  | 7.753125  | 2.729349  |
| S                 | 3.203469  | 7.776240  | 2.666772  |
| S                 | 9.571369  | 10.884443 | 2.716553  |
| S                 | 0.014271  | 10.871551 | 2.675831  |
| S                 | 1.634548  | 7.778967  | 5.484945  |
| S                 | 7.986555  | 10.878823 | 5.465038  |
| S                 | 4.769396  | 7.775500  | 5.488214  |
| S                 | 1.629897  | 10.873189 | 5.480624  |
| S                 | 11.168572 | 7.769101  | 5.469989  |
| S                 | 7.989451  | 7.771795  | 5.471937  |
| S                 | 4.770881  | 10.876374 | 5.481770  |
| S                 | 11.168536 | 10.882180 | 5.462553  |
| S                 | 3.203336  | 7.841410  | 8.431540  |
| S                 | -0.016747 | 10.987389 | 8.165795  |
| S                 | 6.423211  | 7.681169  | 8.185766  |
| S                 | -0.018410 | 7.683561  | 8.182784  |
| S                 | 6.420844  | 10.987408 | 8.172148  |
| S                 | 9.580534  | 7.835800  | 8.301230  |
| S                 | 9.578722  | 10.836139 | 8.289165  |
| S                 | 3.203865  | 10.828447 | 8.429180  |
| S                 | 6.259979  | 9.365892  | 11.038209 |
| S                 | 0.141673  | 9.381224  | 11.032102 |
| S                 | 9.581626  | 9.338205  | 10.832173 |
| C                 | 3.176025  | 8.951765  | 12.441195 |
| H                 | 3.190411  | 9.889274  | 11.864359 |
| H                 | 2.233988  | 8.896107  | 13.002667 |
| H                 | 4.035763  | 8.943905  | 13.124664 |
| H                 | 3.244581  | 8.086365  | 11.765890 |

## 4. Adsorption of species on S edge

| H <sub>2</sub> O* |           |          |          |
|-------------------|-----------|----------|----------|
| Mo                | 4.797738  | 3.172556 | 0.170518 |
| Mo                | 7.938454  | 3.165476 | 0.127005 |
| Mo                | 11.128410 | 3.168130 | 0.133800 |
| Mo                | 1.505388  | 3.173946 | 0.170102 |
| Mo                | 6.348305  | 3.087053 | 2.739004 |
| Mo                | 9.530839  | 3.079933 | 2.756929 |
| Mo                | 3.152742  | 3.102188 | 2.714703 |
| Mo                | -0.041938 | 3.091482 | 2.746591 |
| Mo                | 1.559074  | 3.004944 | 5.498710 |
| Mo                | 4.754704  | 3.051916 | 5.483784 |
| Mo                | 11.114348 | 3.011972 | 5.494421 |
| Mo                | 7.938895  | 2.962875 | 5.505517 |
| Mo                | 6.317602  | 2.913026 | 8.099552 |
| Mo                | 3.199251  | 3.069076 | 8.130295 |
| Mo                | -0.083690 | 2.897445 | 8.099916 |
| Mo                | 9.584875  | 2.880787 | 8.100577 |
| S                 | 6.372982  | 1.529178 | 0.830254 |
| S                 | -0.065300 | 1.531513 | 0.842312 |
| S                 | 6.382087  | 4.761479 | 0.931645 |
| S                 | 3.150843  | 4.761347 | 0.865900 |
| S                 | 9.534124  | 1.561152 | 0.845039 |
| S                 | 3.151286  | 1.551463 | 0.776211 |

|   |           |          |          |
|---|-----------|----------|----------|
| S | 3.222693  | 1.544024 | 0.873518 |
| S | -0.023914 | 4.767143 | 0.853324 |
| S | 9.521363  | 4.740759 | 0.970058 |
| S | 1.590439  | 4.698270 | 3.664595 |
| S | 7.974753  | 1.495440 | 3.679669 |
| S | 1.589235  | 1.565344 | 3.630741 |
| S | 7.974600  | 4.621582 | 3.771030 |
| S | 11.146820 | 4.664942 | 3.713452 |
| S | 4.802897  | 4.665248 | 3.730245 |
| S | 4.759404  | 1.550908 | 3.690880 |
| S | 11.188184 | 1.552631 | 3.674304 |
| S | 3.160504  | 1.547006 | 6.433724 |
| S | 6.459165  | 4.617768 | 6.542415 |
| S | 9.626945  | 1.409426 | 6.461086 |
| S | 9.486847  | 4.616415 | 6.538028 |
| S | -0.032299 | 4.674840 | 6.438223 |
| S | 3.218403  | 4.676167 | 6.441662 |
| S | 0.025411  | 1.547247 | 6.430011 |
| S | 6.319318  | 1.409386 | 6.468660 |
| S | 1.592620  | 1.881910 | 9.424219 |
| S | 4.867438  | 3.834822 | 9.585186 |
| S | 7.975416  | 1.989523 | 9.572042 |
| S | 11.076936 | 3.849159 | 9.583938 |
| C | 1.591896  | 4.490389 | 8.654076 |
| O | 1.592821  | 5.555227 | 9.179310 |

|     |           |          |          |
|-----|-----------|----------|----------|
| OH* |           |          |          |
| Mo  | 4.819887  | 3.099663 | 0.164422 |
| Mo  | 7.972311  | 3.097427 | 0.151096 |
| Mo  | 11.124279 | 3.099805 | 0.164815 |
| Mo  | 1.594490  | 3.100956 | 0.188505 |
| Mo  | 6.385441  | 3.101880 | 2.773973 |
| Mo  | 9.559238  | 3.102026 | 2.773648 |
| Mo  | 3.190668  | 3.110023 | 2.726214 |
| Mo  | -0.001986 | 3.110239 | 2.725982 |
| Mo  | 1.594141  | 3.104968 | 5.465808 |
| Mo  | 4.784480  | 3.139706 | 5.520933 |
| Mo  | 11.159499 | 3.140252 | 5.520498 |
| Mo  | 7.972145  | 3.084538 | 5.537565 |
| Mo  | 6.348931  | 3.110556 | 8.164116 |
| Mo  | 3.141699  | 3.173527 | 8.154493 |
| Mo  | 0.045967  | 3.173874 | 8.154258 |
| Mo  | 9.595737  | 3.111148 | 8.163850 |
| S   | 6.397365  | 1.500942 | 9.020966 |
| S   | -0.026239 | 1.487554 | 0.856072 |
| S   | 6.399606  | 4.698739 | 0.914197 |
| S   | 3.214209  | 4.718440 | 0.846200 |
| S   | 9.546867  | 1.500503 | 0.920800 |
| S   | 3.214612  | 1.487725 | 0.856556 |
| S   | -0.025575 | 4.718946 | 0.845562 |
| S   | 9.544573  | 4.699373 | 0.914115 |
| S   | 1.594341  | 4.673609 | 3.635555 |
| S   | 7.972454  | 1.534793 | 3.705280 |
| S   | 1.594055  | 1.543463 | 3.640198 |
| S   | 7.972284  | 4.655190 | 3.707916 |
| S   | 11.160674 | 4.672659 | 3.665025 |
| S   | 4.783866  | 4.672291 | 3.665571 |
| S   | 4.773121  | 1.561952 | 3.691269 |
| S   | 11.171364 | 1.562209 | 3.691085 |
| S   | 3.212657  | 1.558027 | 6.436931 |
| S   | 6.420123  | 4.704867 | 6.487511 |
| S   | 9.616479  | 1.519832 | 6.482896 |
| S   | 9.523922  | 4.705463 | 6.487173 |
| S   | 0.019717  | 4.716591 | 6.391887 |
| S   | 3.168500  | 4.716327 | 6.392496 |
| S   | -0.024753 | 1.558481 | 6.436601 |
| S   | 6.327775  | 1.519526 | 6.483021 |
| S   | 1.593676  | 1.797697 | 9.259587 |
| S   | 4.757202  | 3.992283 | 9.579178 |
| S   | 7.972481  | 2.176332 | 9.500215 |
| S   | 11.186145 | 3.993380 | 9.579182 |
| O   | 1.593740  | 4.559148 | 8.820979 |
| H   | 1.593601  | 4.492098 | 9.796406 |

|    |           |          |          |
|----|-----------|----------|----------|
| H* |           |          |          |
| Mo | 4.834276  | 3.091241 | 0.157433 |
| Mo | 7.971750  | 3.087858 | 0.158376 |
| Mo | 11.109991 | 3.091455 | 0.158937 |
| Mo | 1.595381  | 3.094876 | 0.181297 |
| Mo | 6.385469  | 3.105467 | 2.780715 |
| Mo | 9.558993  | 3.105697 | 2.780629 |
| Mo | 3.192788  | 3.112251 | 2.723353 |
| Mo | -0.003932 | 3.111744 | 2.723183 |
| Mo | 1.593984  | 3.113263 | 5.455703 |
| Mo | 4.784450  | 3.155886 | 5.522308 |
| Mo | 11.159684 | 3.156544 | 5.522088 |
| Mo | 7.972267  | 3.101494 | 5.531978 |
| Mo | 6.396064  | 3.139360 | 8.151502 |
| Mo | 3.122717  | 3.163474 | 8.140054 |
| Mo | 0.064693  | 3.163595 | 8.139883 |
| Mo | 9.548645  | 3.139445 | 8.151971 |
| S  | 6.398912  | 1.494218 | 0.937432 |
| S  | -0.031946 | 1.486444 | 0.852795 |
| S  | 6.402882  | 4.693997 | 0.916141 |
| S  | 3.222171  | 4.709481 | 0.831930 |
| S  | 9.543819  | 1.494512 | 0.937050 |
| S  | 3.221458  | 1.486462 | 0.853262 |
| S  | -0.032516 | 4.709524 | 0.831163 |
| S  | 9.540150  | 4.693701 | 0.915919 |
| S  | 1.594184  | 4.676884 | 3.624827 |
| S  | 7.972440  | 1.539008 | 3.711683 |
| S  | 1.594450  | 1.545467 | 3.633820 |
| S  | 7.972221  | 4.666662 | 3.701680 |
| S  | 11.163941 | 4.680616 | 3.660313 |
| S  | 4.780773  | 4.680753 | 3.660365 |
| S  | 4.773253  | 1.568832 | 3.700096 |
| S  | 11.171721 | 1.568189 | 3.699535 |

|   |           |          |          |
|---|-----------|----------|----------|
| S | 3.206830  | 1.571331 | 6.438827 |
| S | 6.428898  | 4.732655 | 6.471065 |
| S | 9.609873  | 1.539896 | 6.489296 |
| S | 9.515179  | 4.732235 | 6.471434 |
| S | 0.027577  | 4.733265 | 6.393637 |
| S | 3.159978  | 4.733392 | 6.393836 |
| S | -0.018819 | 1.570850 | 6.438473 |
| S | 6.334574  | 1.540094 | 6.489345 |
| S | 1.593285  | 1.938176 | 9.379405 |
| S | 4.756069  | 4.032501 | 9.505368 |
| S | 7.972259  | 2.216846 | 9.541438 |
| S | 11.188287 | 4.032757 | 9.505581 |
| H | 1.593911  | 4.222384 | 8.251658 |

|    |           |          |           |
|----|-----------|----------|-----------|
| H* |           |          |           |
| Mo | 4.687208  | 3.062564 | 0.190927  |
| Mo | 8.035746  | 3.067634 | 0.191036  |
| Mo | 11.127859 | 3.078369 | 0.190135  |
| Mo | 1.565850  | 3.027285 | 0.171518  |
| Mo | 6.357412  | 3.100491 | 2.733779  |
| Mo | 9.550795  | 3.126374 | 2.797779  |
| Mo | 3.163496  | 3.101650 | 2.775239  |
| Mo | -0.022944 | 3.127213 | 2.819255  |
| Mo | 1.583548  | 3.149660 | 5.578847  |
| Mo | 4.767817  | 3.137122 | 5.460351  |
| Mo | 11.138027 | 3.224992 | 5.546934  |
| Mo | 7.940853  | 3.151323 | 5.556125  |
| Mo | 6.081322  | 3.150509 | 8.072219  |
| Mo | 3.458310  | 3.149962 | 8.077372  |
| Mo | -0.124284 | 3.298728 | 8.155055  |
| Mo | 9.638335  | 3.298122 | 8.143864  |
| S  | 6.365669  | 1.480733 | 0.851159  |
| S  | -0.028474 | 1.516336 | 0.987809  |
| S  | 6.359997  | 4.665769 | 0.804430  |
| S  | 3.128585  | 4.697940 | 0.894949  |
| S  | 9.583169  | 1.467129 | 0.978461  |
| S  | 3.118194  | 1.456235 | 0.940058  |
| S  | -0.021797 | 4.667401 | 0.926019  |
| S  | 9.572816  | 4.711991 | 0.911169  |
| S  | 1.593208  | 4.678314 | 3.709779  |
| S  | 7.953175  | 1.573605 | 3.729444  |
| S  | 1.566006  | 1.570885 | 3.761541  |
| S  | 7.927800  | 4.676798 | 3.675760  |
| S  | 11.136305 | 4.723711 | 3.675143  |
| S  | 4.771498  | 4.682959 | 3.618261  |
| S  | 4.770425  | 1.538842 | 3.661219  |
| S  | 11.136711 | 1.596129 | 3.771982  |
| S  | 3.213663  | 1.532722 | 6.479800  |
| S  | 6.304169  | 4.758163 | 6.453658  |
| S  | 9.599983  | 1.621495 | 6.539892  |
| S  | 9.491537  | 4.824818 | 6.437055  |
| S  | 0.026484  | 4.823866 | 6.451909  |
| S  | 3.229701  | 4.756420 | 6.460456  |
| S  | -0.082193 | 1.622090 | 6.552772  |
| S  | 6.323299  | 1.532666 | 6.472751  |
| S  | 1.577946  | 2.513875 | 9.455394  |
| S  | 4.771711  | 3.155603 | 10.138893 |
| S  | 7.949526  | 2.496226 | 9.450555  |
| S  | 11.128271 | 4.297511 | 9.586963  |
| H  | 4.781787  | 4.494874 | 10.393916 |

|    |           |          |          |
|----|-----------|----------|----------|
| O* |           |          |          |
| Mo | 4.816993  | 3.069345 | 0.160326 |
| Mo | 7.971657  | 3.062287 | 0.150113 |
| Mo | 11.126761 | 3.070182 | 0.161945 |
| Mo | 1.595756  | 3.073824 | 0.189649 |
| Mo | 6.385430  | 3.102204 | 2.769096 |
| Mo | 9.559057  | 3.102345 | 2.768464 |
| Mo | 3.184767  | 3.118664 | 2.728902 |
| Mo | 0.004277  | 3.118680 | 2.727908 |
| Mo | 1.594174  | 3.168897 | 5.456742 |
| Mo | 4.801212  | 3.178232 | 5.532277 |
| Mo | 11.142845 | 3.178463 | 5.531441 |
| Mo | 7.972232  | 3.100913 | 5.518603 |
| Mo | 6.468173  | 3.095345 | 8.141433 |
| Mo | 3.061826  | 3.284077 | 8.208972 |
| Mo | 0.125406  | 3.284164 | 8.208687 |
| Mo | 9.476186  | 3.095270 | 8.141099 |
| S  | 6.391739  | 1.475880 | 0.935474 |
| S  | -0.023779 | 1.468038 | 0.878041 |
| S  | 6.400350  | 4.674725 | 0.890966 |
| S  | 3.216638  | 4.700199 | 0.821381 |
| S  | 9.551843  | 1.474902 | 0.934912 |
| S  | 3.213393  | 1.468428 | 0.880466 |
| S  | -0.026722 | 4.700859 | 0.819583 |
| S  | 9.542820  | 4.676219 | 0.890624 |
| S  | 1.594162  | 4.702596 | 3.609691 |
| S  | 7.972437  | 1.539002 | 3.696487 |
| S  | 1.593984  | 1.563502 | 3.673156 |
| S  | 7.972409  | 4.664739 | 3.685888 |
| S  | 11.155093 | 4.683582 | 3.649501 |
| S  | 4.789699  | 4.683465 | 3.650593 |
| S  | 4.764874  | 1.584416 | 3.714488 |
| S  | 11.179876 | 1.584496 | 3.713461 |
| S  | 3.196677  | 1.653193 | 6.488009 |
| S  | 6.451923  | 4.735885 | 6.492556 |
| S  | 9.607621  | 1.528916 | 6.466713 |
| S  | 9.492075  | 4.736226 | 6.492204 |
| S  | -0.001753 | 4.776792 | 6.367776 |
| S  | 3.189971  | 4.776689 | 6.368333 |
| S  | -0.009184 | 1.653615 | 6.487097 |
| S  | 6.336892  | 1.529125 | 6.467148 |
| S  | 1.592381  | 1.720605 | 9.198215 |
| S  | 4.826363  | 3.827186 | 9.591391 |
| S  | 7.972409  | 2.084646 | 9.539579 |
| S  | 11.117124 | 3.828485 | 9.590738 |
| O  | 1.594021  | 4.465323 | 8.719069 |

| HCOO* |           |          |           |
|-------|-----------|----------|-----------|
| Mo    | 4.696223  | 3.168559 | 0.210780  |
| Mo    | 8.050665  | 3.160561 | 0.203670  |
| Mo    | 11.149470 | 3.178708 | 0.190482  |
| Mo    | 1.598617  | 3.187123 | 0.193906  |
| Mo    | 6.377221  | 3.101117 | 2.757497  |
| Mo    | 9.564646  | 3.114061 | 2.799718  |
| Mo    | 3.181083  | 3.143701 | 2.805092  |
| Mo    | -0.005731 | 3.153799 | 2.831225  |
| Mo    | 1.601940  | 3.145563 | 5.587184  |
| Mo    | 4.788808  | 3.062194 | 5.544687  |
| Mo    | 11.130724 | 3.099057 | 5.565547  |
| Mo    | 7.964765  | 2.988771 | 5.530234  |
| Mo    | 6.316739  | 2.813112 | 8.114072  |
| Mo    | 3.419844  | 3.158433 | 8.210343  |
| Mo    | -0.066533 | 3.179009 | 8.274292  |
| Mo    | 9.586143  | 2.888166 | 8.163144  |
| S     | 6.370970  | 1.557119 | 0.809024  |
| S     | 0.000324  | 1.604919 | 0.947605  |
| S     | 6.378013  | 4.734802 | 0.889786  |
| S     | 3.155187  | 4.792229 | 0.975143  |
| S     | 9.610037  | 1.531184 | 0.911942  |
| S     | 3.137317  | 1.547011 | 0.929491  |
| S     | -0.009386 | 4.748466 | 0.984818  |
| S     | 9.589683  | 4.774871 | 0.981238  |
| S     | 1.599027  | 4.705461 | 3.749725  |
| S     | 7.964875  | 1.509725 | 3.635498  |
| S     | 1.589682  | 1.595180 | 3.745367  |
| S     | 7.953446  | 4.628647 | 3.754321  |
| S     | 11.126547 | 4.683310 | 3.759114  |
| S     | 4.815035  | 4.656626 | 3.733109  |
| S     | 4.763410  | 1.543476 | 3.661846  |
| S     | 11.174238 | 1.561687 | 3.709823  |
| S     | 3.184038  | 1.527714 | 6.525579  |
| S     | 6.420359  | 4.555551 | 6.585890  |
| S     | 9.628553  | 1.385067 | 6.407674  |
| S     | 9.477890  | 4.586292 | 6.574756  |
| S     | -0.030582 | 4.684659 | 6.488391  |
| S     | 3.246122  | 4.708000 | 6.460670  |
| S     | -0.020548 | 1.568751 | 6.533500  |
| S     | 6.321141  | 1.326962 | 6.373782  |
| S     | 1.613993  | 1.968732 | 9.277916  |
| S     | 4.931761  | 2.921393 | 9.946190  |
| S     | 7.988353  | 1.751591 | 9.330187  |
| S     | 11.016234 | 3.410849 | 8.867672  |
| O     | 1.728648  | 5.393189 | 9.663874  |
| C     | 0.577537  | 5.004543 | 9.312279  |
| O     | 2.844579  | 4.858409 | 9.392066  |
| H     | 1.771684  | 6.390978 | 10.282502 |

|    |           |          |          |
|----|-----------|----------|----------|
| Mo | 9.591435  | 3.094614 | 2.769127 |
| Mo | 3.222625  | 3.128351 | 2.724014 |
| Mo | 0.024740  | 3.109366 | 2.755916 |
| Mo | 1.625740  | 3.145201 | 5.493970 |
| Mo | 4.841810  | 3.154158 | 5.516926 |
| Mo | 11.174820 | 3.087702 | 5.540792 |
| Mo | 8.001676  | 3.108480 | 5.483998 |
| Mo | 6.672348  | 3.146291 | 8.104480 |
| Mo | 3.300636  | 3.211727 | 8.207645 |
| Mo | -0.004406 | 3.094916 | 8.248094 |
| Mo | 9.344545  | 3.094160 | 8.090496 |
| S  | 6.439848  | 1.496589 | 0.882506 |
| S  | 0.006287  | 1.490949 | 0.901980 |
| S  | 6.447051  | 4.721101 | 0.875486 |
| S  | 3.220715  | 4.730321 | 0.823978 |
| S  | 9.604088  | 1.510348 | 0.905773 |
| S  | 3.222862  | 1.502798 | 0.845171 |
| S  | -0.004507 | 4.720463 | 0.895239 |
| S  | 9.605257  | 4.686916 | 0.910079 |
| S  | 1.621882  | 4.689085 | 3.645850 |
| S  | 7.990753  | 1.535354 | 3.665811 |
| S  | 1.637973  | 1.570699 | 3.671219 |
| S  | 8.007569  | 4.674188 | 3.659508 |
| S  | 11.183752 | 4.646355 | 3.698542 |
| S  | 4.826272  | 4.684991 | 3.652024 |
| S  | 4.808374  | 1.578844 | 3.682147 |
| S  | 11.195259 | 1.540864 | 3.694820 |
| S  | 3.230757  | 1.608936 | 6.430209 |
| S  | 6.481128  | 4.755903 | 6.467039 |
| S  | 9.535929  | 1.467044 | 6.478044 |
| S  | 9.584950  | 4.711964 | 6.463301 |
| S  | -0.015442 | 4.657493 | 6.429908 |
| S  | 3.244796  | 4.733129 | 6.403079 |
| S  | 0.048570  | 1.547204 | 6.460875 |
| S  | 6.406974  | 1.519632 | 6.482000 |
| S  | 1.699285  | 1.888589 | 9.298020 |
| S  | 4.951878  | 3.973276 | 9.566424 |
| S  | 8.024453  | 3.128704 | 9.982952 |
| S  | 11.098537 | 2.203349 | 9.488589 |
| C  | 2.139843  | 4.803738 | 9.009422 |
| O  | 0.884245  | 4.740926 | 9.160941 |
| H  | 2.581260  | 5.779997 | 9.301440 |

|      |           |          |           |
|------|-----------|----------|-----------|
| COH* |           |          |           |
| Mo   | 4.792560  | 3.036449 | 0.139068  |
| Mo   | 7.967517  | 3.040680 | 0.134701  |
| Mo   | 11.107325 | 3.032328 | 0.163413  |
| Mo   | 1.662900  | 3.029035 | 0.160140  |
| Mo   | 6.381105  | 3.116970 | 2.771595  |
| Mo   | 9.563184  | 3.114108 | 2.746096  |
| Mo   | 3.199270  | 3.101912 | 2.749777  |
| Mo   | 0.001380  | 3.100722 | 2.709446  |
| Mo   | 1.591426  | 3.142113 | 5.494823  |
| Mo   | 4.788376  | 3.200266 | 5.509430  |
| Mo   | 11.162872 | 3.203233 | 5.485008  |
| Mo   | 7.976939  | 3.201826 | 5.516748  |
| Mo   | 6.270804  | 3.311185 | 8.106871  |
| Mo   | 3.327720  | 3.235330 | 8.109466  |
| Mo   | -0.130580 | 3.236862 | 8.087428  |
| Mo   | 9.653270  | 3.316022 | 8.102751  |
| S    | 6.384065  | 1.481504 | 0.957778  |
| S    | 0.005110  | 1.448603 | 0.855723  |
| S    | 6.379441  | 4.644042 | 0.863420  |
| S    | 3.223935  | 4.666822 | 0.848250  |
| S    | 9.528260  | 1.445340 | 0.935605  |
| S    | 3.234403  | 1.437864 | 0.938530  |
| S    | 0.009660  | 4.648112 | 0.764296  |
| S    | 9.537703  | 4.672334 | 0.838114  |
| S    | 1.589481  | 4.669923 | 3.618332  |
| S    | 7.978115  | 1.585062 | 3.738318  |
| S    | 1.590123  | 1.557614 | 3.678542  |
| S    | 7.979595  | 4.701876 | 3.631642  |
| S    | 11.175508 | 4.699575 | 3.594801  |
| S    | 4.776095  | 4.072897 | 3.632661  |
| S    | 4.792116  | 1.578266 | 3.727832  |
| S    | 11.161276 | 1.580013 | 3.694040  |
| S    | 3.210922  | 1.581779 | 6.467787  |
| S    | 6.390807  | 4.849485 | 6.402001  |
| S    | 9.601895  | 1.646062 | 6.517451  |
| S    | 9.558363  | 4.850186 | 6.377541  |
| S    | 0.026713  | 4.783543 | 6.388259  |
| S    | 3.167066  | 4.786509 | 6.408404  |
| S    | -0.031018 | 1.571999 | 6.439518  |
| S    | 6.354698  | 1.635980 | 6.528602  |
| S    | 1.580984  | 2.246039 | 9.467254  |
| S    | 4.783173  | 3.631225 | 9.856732  |
| S    | 7.983174  | 2.390756 | 9.392542  |
| S    | 11.174508 | 3.941499 | 9.755132  |
| C    | 1.585774  | 4.076686 | 9.061756  |
| O    | 1.637973  | 5.075569 | 9.971683  |
| H    | 0.724688  | 5.303004 | 10.255171 |

|                    |           |          |          |
|--------------------|-----------|----------|----------|
| CH <sub>2</sub> O* |           |          |          |
| Mo                 | 4.767625  | 3.126505 | 0.149734 |
| Mo                 | 7.925148  | 3.112527 | 0.176824 |
| Mo                 | 11.220267 | 3.129448 | 0.178765 |
| Mo                 | 1.610160  | 3.138270 | 0.152443 |
| Mo                 | 6.378669  | 3.088944 | 2.750791 |
| Mo                 | 9.567944  | 3.088279 | 2.711318 |
| Mo                 | 3.191854  | 3.129042 | 2.783974 |
| Mo                 | 0.012404  | 3.131531 | 2.763304 |
| Mo                 | 1.607205  | 3.136669 | 5.534361 |
| Mo                 | 4.807072  | 3.106130 | 5.541255 |
| Mo                 | 11.132357 | 3.107916 | 5.498568 |
| Mo                 | 7.980841  | 2.999909 | 5.479736 |
| Mo                 | 6.483158  | 2.971466 | 8.140899 |
| Mo                 | 3.229344  | 3.224500 | 8.323468 |

|    |           |          |          |
|----|-----------|----------|----------|
| Mo | -0.051956 | 3.206081 | 8.247021 |
| Mo | 9.579553  | 2.947956 | 8.126097 |
| S  | 6.332586  | 1.495392 | 0.874378 |
| S  | 0.045776  | 1.523237 | 0.904772 |
| S  | 6.348518  | 4.724374 | 0.910421 |
| S  | 3.195919  | 4.719244 | 0.930037 |
| S  | 9.580474  | 1.503563 | 0.797462 |
| S  | 3.183765  | 1.546057 | 0.923463 |
| S  | 0.036740  | 4.747331 | 0.908666 |
| S  | 9.564823  | 4.718460 | 0.836756 |
| S  | 1.600551  | 4.695833 | 3.697074 |
| S  | 7.982594  | 1.495115 | 3.608874 |
| S  | 1.598633  | 1.574812 | 3.709167 |
| S  | 7.982881  | 4.620346 | 3.685950 |
| S  | 11.131134 | 4.667404 | 3.662652 |
| S  | 4.815211  | 4.663622 | 3.706069 |
| S  | 4.770958  | 1.553795 | 3.693634 |
| S  | 11.177166 | 1.553323 | 3.651382 |
| S  | 3.196926  | 1.610439 | 6.531467 |
| S  | 6.483774  | 4.618518 | 6.483064 |
| S  | 9.634150  | 1.413765 | 6.384134 |
| S  | 9.488726  | 4.614124 | 6.500445 |
| S  | -0.032395 | 4.681672 | 6.410781 |
| S  | 3.227387  | 4.690291 | 6.465885 |
| S  | -0.029050 | 1.591442 | 6.475484 |
| S  | 6.332602  | 1.427892 | 6.407291 |
| S  | 1.518875  | 1.835550 | 9.260607 |
| S  | 5.050691  | 4.009489 | 9.568082 |
| S  | 8.014635  | 1.870431 | 9.413838 |
| S  | 10.992760 | 3.689608 | 9.745655 |
| C  | 2.129804  | 4.873037 | 9.815127 |
| O  | 0.830364  | 4.886731 | 9.149586 |
| H  | 2.602255  | 5.852115 | 9.371758 |
| H  | 2.578747  | 4.054513 | 9.931423 |

|       |           |          |           |
|-------|-----------|----------|-----------|
| CHOH* |           |          |           |
| Mo    | 4.771610  | 3.165539 | 0.186018  |
| Mo    | 8.076962  | 3.164525 | 0.184277  |
| Mo    | 11.231208 | 3.179081 | 0.177445  |
| Mo    | 1.601834  | 3.178895 | 0.166149  |
| Mo    | 6.422279  | 3.097147 | 2.714441  |
| Mo    | 9.614226  | 3.121814 | 2.779364  |
| Mo    | 3.217944  | 3.112151 | 2.765157  |
| Mo    | 0.036573  | 3.131211 | 2.814216  |
| Mo    | 1.638277  | 3.062507 | 5.584974  |
| Mo    | 4.820704  | 3.030898 | 5.462157  |
| Mo    | 11.201832 | 3.087578 | 5.553499  |
| Mo    | 8.000798  | 3.019715 | 5.516769  |
| Mo    | 6.165915  | 2.907584 | 8.056477  |
| Mo    | 3.543317  | 3.034021 | 8.070561  |
| Mo    | -0.179490 | 3.017163 | 8.194647  |
| Mo    | 9.627807  | 3.025395 | 8.138352  |
| S     | 6.424284  | 1.540437 | 0.773720  |
| S     | 0.041742  | 1.575854 | 0.930868  |
| S     | 6.426699  | 4.752262 | 0.856804  |
| S     | 3.189264  | 4.763679 | 0.944671  |
| S     | 9.659862  | 1.548542 | 0.889811  |
| S     | 3.176673  | 1.547351 | 0.868654  |
| S     | 0.043173  | 4.755541 | 0.990743  |
| S     | 9.646335  | 4.768065 | 0.952285  |
| S     | 1.641695  | 4.652562 | 3.768570  |
| S     | 8.014946  | 1.522651 | 3.631810  |
| S     | 1.628772  | 1.552682 | 3.709286  |
| S     | 7.992533  | 4.635396 | 3.719877  |
| S     | 11.193969 | 4.678957 | 3.750531  |
| S     | 4.841397  | 4.642235 | 3.673579  |
| S     | 4.821233  | 1.512400 | 3.591855  |
| S     | 11.201090 | 1.554527 | 3.696488  |
| S     | 3.257365  | 1.417105 | 6.445699  |
| S     | 6.398637  | 4.594286 | 6.508875  |
| S     | 9.650611  | 1.443387 | 6.445379  |
| S     | 9.541604  | 4.648452 | 6.509761  |
| S     | 0.061107  | 4.639902 | 6.589697  |
| S     | 3.292926  | 4.656525 | 6.444912  |
| S     | -0.002188 | 1.435420 | 6.465284  |
| S     | 6.385251  | 1.360285 | 6.371604  |
| S     | 1.606632  | 1.930369 | 9.415862  |
| S     | 4.871015  | 2.925363 | 9.992541  |
| S     | 7.986178  | 2.082257 | 9.393223  |
| Mo    | 11.064234 | 3.704560 | 9.799178  |
| C     | 1.237607  | 3.639754 | 9.750803  |
| O     | 2.336495  | 4.504985 | 9.365533  |
| H     | 2.923668  | 4.645623 | 10.144347 |
| H     | 0.884278  | 3.883793 | 10.758644 |

|                     |           |          |          |
|---------------------|-----------|----------|----------|
| CH <sub>3</sub> OH* |           |          |          |
| Mo                  | 4.781394  | 3.271406 | 0.260070 |
| Mo                  | 8.045271  | 3.260606 | 0.247032 |
| Mo                  | 11.204746 | 3.267256 | 0.228194 |
| Mo                  | 1.590696  | 3.280434 | 0.229137 |
| Mo                  | 6.411200  | 3.129132 | 2.791208 |
| Mo                  | 9.598260  | 3.115921 | 2.840074 |
| Mo                  | 3.208820  | 3.153200 | 2.820979 |
| Mo                  | 0.020774  | 3.137896 | 2.855373 |
| Mo                  | 1.616657  | 3.018984 | 5.607938 |
| Mo                  | 4.837641  | 3.022508 | 5.551916 |
| Mo                  | 11.185202 | 2.978659 | 5.598482 |
| Mo                  | 7.993921  | 2.937473 | 5.573546 |
| Mo                  | 6.338366  | 2.811311 | 8.177269 |
| Mo                  | 3.250154  | 2.953083 | 8.221245 |
| Mo                  | -0.193313 | 2.925444 | 8.262034 |
| Mo                  | 9.665494  | 2.762682 | 8.163739 |
| S                   | 6.412223  | 1.619762 | 0.819018 |
| S                   | 0.026721  | 1.644405 | 0.921169 |
| S                   | 6.422293  | 4.841936 | 0.991298 |
| S                   | 3.180550  | 4.851763 | 1.034297 |
| S                   | 9.631314  | 1.618133 | 0.892629 |

|   |           |          |           |
|---|-----------|----------|-----------|
| S | 3.176706  | 1.635982 | 0.881080  |
| S | 0.014114  | 4.824791 | 1.085949  |
| S | 9.624374  | 4.821125 | 1.072880  |
| S | 1.616312  | 4.658234 | 3.837220  |
| S | 7.987411  | 1.503984 | 3.643246  |
| S | 1.629700  | 1.552450 | 3.700211  |
| S | 7.997650  | 4.617261 | 3.834806  |
| S | 11.173076 | 4.637632 | 3.853131  |
| S | 4.832590  | 4.659292 | 3.788445  |
| S | 4.804873  | 1.542951 | 3.645141  |
| S | 11.199507 | 1.516563 | 3.683056  |
| S | 3.267911  | 1.408971 | 6.443553  |
| S | 6.461056  | 4.515476 | 6.612618  |
| S | 9.631657  | 1.272248 | 6.413914  |
| S | 9.555722  | 4.490133 | 6.642706  |
| S | -0.009837 | 4.552885 | 6.614814  |
| S | 3.238552  | 4.557616 | 6.537345  |
| S | 0.035976  | 1.369155 | 6.464779  |
| S | 6.340378  | 1.314388 | 6.404498  |
| S | 1.631277  | 1.665590 | 9.236083  |
| S | 4.871531  | 3.529347 | 9.787214  |
| S | 7.960846  | 1.724765 | 9.368275  |
| S | 11.049326 | 2.977320 | 10.000270 |
| C | 0.771384  | 4.444577 | 9.604928  |
| O | 2.170626  | 4.669477 | 9.250807  |
| H | 0.237552  | 5.398867 | 9.466797  |
| H | 0.725340  | 4.139071 | 10.658453 |
| H | 2.678809  | 4.957920 | 10.035390 |

| CH* |           |          |          |
|-----|-----------|----------|----------|
| Mo  | 4.859298  | 3.080576 | 0.145697 |
| Mo  | 7.960840  | 3.076520 | 0.118976 |
| Mo  | 11.178433 | 3.068340 | 0.118242 |
| Mo  | 1.511278  | 3.066502 | 0.137092 |
| Mo  | 6.379287  | 3.122763 | 2.736307 |
| Mo  | 9.567012  | 3.117770 | 2.756260 |
| Mo  | 3.188572  | 3.107063 | 2.701790 |
| Mo  | -0.004201 | 3.102554 | 2.743811 |
| Mo  | 1.596838  | 3.116506 | 5.490397 |
| Mo  | 4.781134  | 3.169626 | 5.477767 |
| Mo  | 11.160164 | 3.168356 | 5.497500 |
| Mo  | 7.970555  | 3.183218 | 5.504321 |
| Mo  | 6.261409  | 3.254743 | 8.075082 |
| Mo  | 3.344771  | 3.160779 | 8.077962 |
| Mo  | -0.149827 | 3.161149 | 8.083740 |
| Mo  | 9.678195  | 3.258326 | 8.089180 |
| S   | 6.413111  | 1.470414 | 0.906934 |
| S   | -0.036407 | 1.458659 | 0.915634 |
| S   | 6.413713  | 4.714550 | 0.852293 |
| S   | 3.177936  | 4.668662 | 0.772192 |
| S   | 9.565703  | 1.517013 | 0.914883 |
| S   | 3.189234  | 1.494461 | 0.816034 |
| S   | -0.030792 | 4.695096 | 0.867591 |
| S   | 9.573687  | 4.655527 | 0.860838 |
| S   | 1.609606  | 4.662753 | 3.631424 |
| S   | 7.964744  | 1.583861 | 3.708075 |
| S   | 1.605825  | 1.550287 | 3.654145 |
| S   | 7.969158  | 4.698791 | 3.633349 |
| S   | 11.170341 | 4.690452 | 3.638481 |
| S   | 4.766012  | 4.693075 | 3.609314 |
| S   | 4.783012  | 1.571761 | 3.662979 |
| S   | 11.153452 | 1.564701 | 3.694989 |
| S   | 3.212815  | 1.531579 | 6.432843 |
| S   | 3.676007  | 4.817728 | 6.390965 |
| S   | 9.587255  | 1.599490 | 6.495800 |
| S   | 9.560700  | 4.816358 | 6.402501 |
| S   | 0.024638  | 4.745999 | 6.419685 |
| S   | 3.166810  | 4.747654 | 6.416093 |
| S   | -0.020717 | 1.530390 | 6.438593 |
| S   | 6.349958  | 1.596825 | 6.480463 |
| S   | 1.598118  | 2.268443 | 9.535562 |
| S   | 4.782162  | 3.478805 | 9.855630 |
| S   | 7.969410  | 2.317419 | 9.350915 |
| S   | 11.167785 | 3.505590 | 9.856508 |
| C   | 1.597903  | 3.957162 | 9.113036 |
| H   | 1.599475  | 4.740529 | 9.878823 |

|                   |           |          |          |
|-------------------|-----------|----------|----------|
| S                 | 9.608332  | 1.497286 | 0.884410 |
| S                 | 3.163780  | 1.513867 | 0.878795 |
| S                 | -0.002489 | 4.716712 | 0.914937 |
| S                 | 5.959348  | 4.728972 | 0.913375 |
| S                 | 1.602352  | 4.688997 | 3.760277 |
| S                 | 7.969760  | 1.510095 | 3.630071 |
| S                 | 1.604017  | 1.554682 | 3.667659 |
| S                 | 7.972385  | 4.635586 | 3.689731 |
| S                 | 11.149083 | 4.663630 | 3.697891 |
| S                 | 4.807273  | 4.663589 | 3.671610 |
| S                 | 4.776751  | 1.562141 | 3.656817 |
| S                 | 11.179286 | 4.658617 | 3.691190 |
| S                 | 3.202804  | 5.169562 | 6.461730 |
| S                 | 6.459270  | 4.644788 | 6.489303 |
| S                 | 9.619105  | 1.445701 | 6.424629 |
| S                 | 9.493107  | 4.641544 | 6.498503 |
| S                 | 0.006046  | 4.700313 | 6.425959 |
| S                 | 3.196690  | 4.703461 | 6.419825 |
| S                 | 0.005928  | 1.569009 | 6.471961 |
| S                 | 6.329411  | 1.448152 | 6.415512 |
| S                 | 1.609549  | 1.848140 | 9.343709 |
| S                 | 4.871646  | 3.655666 | 9.571979 |
| S                 | 7.967263  | 1.977835 | 9.486111 |
| S                 | 11.083714 | 3.835188 | 9.580684 |
| C                 | 1.580905  | 4.739988 | 8.971044 |
| H                 | 2.451689  | 4.673489 | 9.685559 |
| H                 | 1.596849  | 5.713232 | 8.474895 |
| H                 | 0.760023  | 4.678872 | 9.704302 |
| <hr/>             |           |          |          |
| <hr/>             |           |          |          |
| CH <sub>3</sub> * |           |          |          |
| Mo                | 4.733322  | 3.150597 | 0.155329 |
| Mo                | 8.035524  | 3.154397 | 0.157481 |
| Mo                | 11.176371 | 3.151366 | 0.130490 |
| Mo                | 1.581059  | 3.153734 | 0.126249 |
| Mo                | 6.382937  | 3.110429 | 2.698801 |
| Mo                | 9.574359  | 3.108271 | 2.740246 |
| Mo                | 3.188196  | 3.111008 | 2.733726 |
| Mo                | 0.003390  | 3.112480 | 2.764023 |
| Mo                | 1.602725  | 3.035806 | 5.501137 |
| Mo                | 4.791404  | 3.087968 | 5.477898 |

|    |           |          |           |
|----|-----------|----------|-----------|
| Mo | 11.165226 | 3.082938 | 5.506069  |
| Mo | 7.974459  | 3.035616 | 5.480969  |
| Mo | 6.383948  | 3.011220 | 8.089847  |
| Mo | 3.201309  | 3.004665 | 8.097952  |
| Mo | 0.008414  | 3.001942 | 8.108302  |
| Mo | 9.564695  | 3.002620 | 8.102854  |
| S  | 6.382176  | 1.534449 | 0.774469  |
| S  | 0.003299  | 1.557888 | 0.882074  |
| S  | 6.386851  | 4.741965 | 0.822920  |
| S  | 3.153575  | 4.752986 | 0.901793  |
| S  | 9.612511  | 1.523211 | 0.860012  |
| S  | 3.152561  | 1.528217 | 0.846772  |
| S  | 0.001400  | 4.725073 | 0.931764  |
| S  | 9.607330  | 4.749928 | 0.910132  |
| S  | 1.604058  | 4.646544 | 3.707063  |
| S  | 7.967505  | 1.525353 | 3.609174  |
| S  | 1.602730  | 1.526009 | 3.637141  |
| S  | 7.968578  | 4.644293 | 3.676340  |
| S  | 11.158731 | 4.664285 | 3.698872  |
| S  | 4.796176  | 4.663532 | 3.658409  |
| S  | 4.794833  | 1.546887 | 3.617475  |
| S  | 11.162374 | 1.543038 | 3.653092  |
| S  | 3.247989  | 1.442304 | 6.396927  |
| S  | 6.428329  | 4.644428 | 6.453374  |
| S  | 9.610762  | 1.439568 | 6.404309  |
| S  | 9.523433  | 4.637650 | 6.472459  |
| S  | 0.051283  | 4.639092 | 6.480981  |
| S  | 3.156333  | 4.641882 | 6.466715  |
| S  | -0.036689 | 1.439208 | 6.411960  |
| S  | 6.335605  | 1.446399 | 6.391642  |
| S  | 1.611729  | 2.057862 | 9.464487  |
| S  | 4.794107  | 3.902384 | 9.492506  |
| S  | 7.965503  | 2.062261 | 9.463910  |
| S  | 11.161915 | 3.870869 | 9.514132  |
| C  | 1.620158  | 5.333425 | 11.913175 |
| H  | 1.659750  | 6.300646 | 12.429945 |
| H  | 0.715106  | 4.791725 | 12.214641 |
| H  | 2.506022  | 4.741240 | 12.172000 |
| H  | 1.599134  | 5.500194 | 10.828802 |

### 5. Transition state of elementary reaction on MoS<sub>2-y</sub>(001)

|                               |           |           |           |
|-------------------------------|-----------|-----------|-----------|
| Mo                            | 10.222545 | -1.577560 | 1.410925  |
| Mo                            | 10.098761 | 1.528124  | 1.524095  |
| Mo                            | 12.870814 | -6.382873 | 1.600714  |
| Mo                            | 12.860488 | -3.133947 | 1.542486  |
| Mo                            | 12.857164 | -0.026188 | 1.509437  |
| S                             | 0.914186  | 1.604516  | 0.056119  |
| S                             | 0.918824  | 4.776425  | 0.036826  |
| S                             | 0.934381  | 7.996539  | 0.017009  |
| S                             | 3.677460  | 0.015860  | 0.053735  |
| S                             | 3.668468  | 3.200534  | 0.058300  |
| S                             | 3.685371  | 6.392291  | 0.042982  |
| S                             | 6.435294  | -1.574020 | -0.001729 |
| S                             | 6.417913  | 1.603049  | -0.013471 |
| S                             | 6.436720  | 4.802227  | 0.026666  |
| S                             | 9.186825  | -3.206367 | -0.046764 |
| S                             | 9.201579  | -0.014657 | -0.060591 |
| S                             | 9.231605  | 3.168077  | -0.013947 |
| S                             | 11.991725 | -4.784676 | 0.021307  |
| S                             | 12.022834 | -1.601040 | -0.124961 |
| S                             | 11.960009 | 1.611162  | -0.009356 |
| S                             | 0.893768  | 1.593849  | 3.176542  |
| S                             | 0.860514  | 4.821501  | 3.150042  |
| S                             | 0.853169  | 7.964319  | 3.131132  |
| S                             | 3.686939  | 0.008448  | 3.167610  |
| S                             | 3.688007  | 3.203381  | 3.173162  |
| S                             | 3.680760  | 6.396822  | 3.160141  |
| S                             | 6.527997  | -1.531599 | 3.110252  |
| S                             | 6.521591  | 1.587228  | 3.127980  |
| S                             | 6.487585  | 4.799011  | 3.124420  |
| S                             | 9.227906  | -0.384904 | 3.063037  |
| S                             | 11.954123 | -4.732451 | 3.128411  |
| S                             | 11.898333 | 1.497692  | 3.107055  |
| S                             | 9.220862  | 3.131616  | 3.097691  |
| O                             | 11.938191 | -1.517152 | 2.672356  |
| H                             | 10.782967 | -0.017301 | 3.075597  |
| 2OH* = H <sub>2</sub> O* + O* |           |           |           |
| Mo                            | 1.827986  | 0.051033  | 1.546574  |
| Mo                            | 1.833948  | 3.248221  | 1.559532  |
| Mo                            | 1.820219  | 6.433717  | 1.540369  |
| Mo                            | 4.602172  | -1.547898 | 1.517493  |
| Mo                            | 4.600970  | 1.645011  | 1.521959  |
| Mo                            | 4.599771  | 4.833155  | 1.529351  |
| Mo                            | 7.367588  | -3.131747 | 1.510257  |
| Mo                            | 7.356996  | 0.056362  | 1.409983  |
| Mo                            | 7.367975  | 3.214836  | 1.516154  |
| Mo                            | 10.150000 | -4.752322 | 1.568397  |
| Mo                            | 10.144446 | -1.518188 | 1.500474  |
| Mo                            | 10.087316 | 1.554858  | 1.584007  |
| Mo                            | 12.904949 | -6.300374 | 1.558894  |
| Mo                            | 12.851506 | -3.096282 | 1.553150  |
| Mo                            | 12.861176 | 0.031847  | 1.511222  |
| S                             | 0.921762  | 1.657161  | -0.009760 |
| S                             | 0.881695  | 4.829658  | 0.001545  |
| S                             | 0.898958  | 8.035305  | -0.024725 |
| S                             | 3.665105  | 0.048280  | -0.024595 |
| S                             | 3.661566  | 3.243686  | -0.022263 |
| S                             | 3.662250  | 6.423409  | -0.029219 |
| S                             | 6.423121  | -1.568937 | -0.078646 |
| S                             | 6.416001  | 1.657298  | -0.081682 |

|                            |           |           |           |
|----------------------------|-----------|-----------|-----------|
| S                          | 6.447264  | 4.824430  | -0.036313 |
| S                          | 9.234042  | -3.152980 | -0.024290 |
| S                          | 9.212143  | 0.029088  | -0.054130 |
| S                          | 9.257338  | 3.181858  | 0.015162  |
| S                          | 11.978965 | -4.712549 | 0.006850  |
| S                          | 11.940705 | -1.548550 | -0.089219 |
| S                          | 11.940499 | 1.659056  | 0.010686  |
| S                          | 9.934038  | 1.648844  | 3.123584  |
| S                          | 0.888209  | 4.859404  | 3.111443  |
| S                          | 0.878626  | 8.013320  | 3.095868  |
| S                          | 3.690245  | 0.045028  | 3.087298  |
| S                          | 3.698480  | 3.239509  | 3.101472  |
| S                          | 3.684203  | 6.432758  | 3.090839  |
| S                          | 6.503339  | -1.500874 | 3.053473  |
| S                          | 6.499761  | 1.595124  | 3.059248  |
| S                          | 6.457739  | 4.832023  | 3.071003  |
| S                          | 9.211168  | -3.124166 | 3.070585  |
| S                          | 11.973322 | -4.699582 | 3.131476  |
| S                          | 11.988519 | 1.645710  | 3.083465  |
| S                          | 9.178973  | 3.168245  | 3.117722  |
| O                          | 11.917652 | -1.469333 | 2.702023  |
| O                          | 10.052315 | -0.253032 | 3.297942  |
| H                          | 11.173152 | -0.940754 | 3.426057  |
| H                          | 9.247255  | -0.380597 | 3.841819  |
| <hr/>                      |           |           |           |
| CO*+O*=CO <sub>2</sub> *+* |           |           |           |
| Mo                         | 1.861790  | 0.009131  | 1.563025  |
| Mo                         | 1.875979  | 3.211068  | 1.547720  |
| Mo                         | 1.848642  | 6.400102  | 1.524198  |
| Mo                         | 4.654686  | -1.567039 | 1.575514  |
| Mo                         | 4.641425  | 1.610514  | 1.573740  |
| Mo                         | 4.644099  | 4.803389  | 1.553862  |
| Mo                         | 7.422771  | -3.155473 | 1.532364  |
| Mo                         | 7.452942  | 0.025161  | 1.564311  |
| Mo                         | 7.417126  | 3.200948  | 1.522404  |
| Mo                         | 10.186982 | -4.775518 | 1.470072  |
| Mo                         | 10.293189 | -1.618988 | 1.487498  |
| Mo                         | 10.160220 | 1.584349  | 1.506290  |
| Mo                         | 12.932792 | -6.350312 | 1.516062  |
| Mo                         | 12.932350 | -3.133147 | 1.454285  |
| Mo                         | 12.897744 | -0.031901 | 1.484820  |
| S                          | 0.977285  | 1.606355  | -0.011996 |
| S                          | 0.971927  | 4.785240  | -0.058722 |
| S                          | 0.937248  | 8.010543  | -0.036436 |
| S                          | 3.718541  | 0.016213  | 0.016725  |
| S                          | 3.729358  | 3.199891  | 0.000698  |
| S                          | 3.731528  | 6.412170  | 0.000996  |
| S                          | 6.494333  | -1.538698 | 0.005260  |
| S                          | 6.482891  | 1.577752  | 0.001664  |
| S                          | 6.480356  | 4.809791  | -0.018574 |
| S                          | 9.239311  | -3.197709 | -0.099602 |
| S                          | 9.279135  | -0.061421 | -0.027229 |
| S                          | 9.251644  | 3.169481  | -0.057338 |
| S                          | 12.045665 | -4.760624 | -0.086936 |
| S                          | 12.035724 | -1.577288 | -0.106238 |
| S                          | 12.013584 | 1.602211  | -0.049586 |
| S                          | 9.940323  | 1.619516  | 3.108074  |
| S                          | 0.890432  | 4.839702  | 3.075401  |
| S                          | 0.873596  | 7.941039  | 3.093622  |
| S                          | 3.707824  | 0.013940  | 3.134371  |

|   |           |           |          |
|---|-----------|-----------|----------|
| S | 3.713936  | 3.219023  | 3.121959 |
| S | 3.697525  | 6.397302  | 3.104747 |
| S | 6.536729  | -1.569005 | 3.118187 |
| S | 6.510686  | 1.620043  | 3.112093 |
| S | 6.508606  | 4.804555  | 3.091379 |
| S | 9.309877  | -3.207840 | 3.026316 |
| S | 12.007415 | -4.694852 | 3.036251 |
| S | 12.001430 | 1.587569  | 3.050971 |
| S | 9.276214  | 3.205969  | 3.054458 |
| C | 10.264991 | -0.708354 | 3.397415 |
| O | 10.484021 | -0.654050 | 4.562219 |
| O | 9.149567  | 0.293167  | 2.854713 |

|                       |           |           |           |
|-----------------------|-----------|-----------|-----------|
| CO* + OH* = COOH* + * |           |           |           |
| Mo                    | 1.843131  | -0.039636 | 1.597874  |
| Mo                    | 1.862075  | 3.149373  | 1.623040  |
| Mo                    | 1.835838  | 6.345498  | 1.622065  |
| Mo                    | 4.620192  | -1.627607 | 1.584160  |
| Mo                    | 4.619344  | 1.561511  | 1.581438  |
| Mo                    | 4.616984  | 4.749995  | 1.590484  |
| Mo                    | 7.386310  | -3.211620 | 1.555849  |
| Mo                    | 7.361744  | -0.008276 | 1.482270  |
| Mo                    | 7.388838  | 3.131090  | 1.545906  |
| Mo                    | 10.148376 | -4.830414 | 1.592220  |
| Mo                    | 10.135995 | -1.629952 | 1.551244  |
| Mo                    | 10.138924 | 1.545323  | 1.535537  |
| Mo                    | 12.910693 | -6.391890 | 1.595953  |
| Mo                    | 12.889672 | -3.201992 | 1.711698  |
| Mo                    | 12.845083 | 0.014668  | 1.542795  |
| S                     | 0.944877  | 1.570270  | 0.039548  |
| S                     | 0.881940  | 4.745474  | 0.101141  |
| S                     | 0.929807  | 7.929161  | 0.030872  |
| S                     | 3.683622  | -0.037734 | 0.033594  |
| S                     | 3.679361  | 3.161876  | 0.036144  |
| S                     | 3.670152  | 6.342218  | 0.043705  |
| S                     | 6.436306  | -1.632640 | -0.021393 |
| S                     | 6.424109  | 1.565595  | -0.038288 |
| S                     | 6.449740  | 4.750175  | 0.011984  |
| S                     | 9.235305  | -3.235829 | -0.005714 |
| S                     | 9.226220  | -0.029897 | 0.014580  |
| S                     | 9.255625  | 3.148328  | 0.000069  |
| S                     | 12.013413 | -4.758035 | 0.074609  |
| S                     | 11.977878 | -1.667945 | 0.043668  |
| S                     | 11.961498 | 1.619222  | -0.009987 |
| S                     | 0.938182  | 1.547286  | 3.172694  |
| S                     | 0.974439  | 4.737302  | 3.194375  |
| S                     | 0.862373  | 7.940129  | 3.145155  |
| S                     | 3.699494  | -0.038015 | 3.146313  |
| S                     | 3.726477  | 3.149274  | 3.161470  |
| S                     | 3.709583  | 6.350877  | 3.159119  |
| S                     | 6.520743  | -1.588184 | 3.102549  |
| S                     | 6.512237  | 1.531646  | 3.111163  |
| S                     | 6.485053  | 4.742604  | 3.117217  |
| S                     | 9.224227  | -3.228394 | 3.110748  |
| S                     | 11.963299 | -4.859152 | 3.181164  |
| S                     | 11.964333 | 1.584301  | 3.124630  |
| S                     | 9.210540  | 3.083810  | 3.118289  |
| C                     | 11.728486 | -1.313634 | 2.926515  |
| O                     | 12.246289 | -2.065830 | 3.774249  |
| O                     | 10.233928 | -0.496072 | 3.489183  |
| H                     | 9.870356  | -1.091108 | 4.185489  |

|                     |           |           |           |
|---------------------|-----------|-----------|-----------|
| CO* + H* = CHO* + * |           |           |           |
| Mo                  | 1.798215  | -0.019119 | 1.581902  |
| Mo                  | 1.825100  | 3.165070  | 1.604822  |
| Mo                  | 1.802450  | 6.364789  | 1.606864  |
| Mo                  | 4.585301  | -1.593892 | 1.561468  |
| Mo                  | 4.589006  | 1.581727  | 1.558558  |
| Mo                  | 4.583464  | 4.781364  | 1.564832  |
| Mo                  | 7.351069  | -3.162889 | 1.515322  |
| Mo                  | 7.364251  | 0.025513  | 1.456279  |
| Mo                  | 7.350198  | 3.176597  | 1.500446  |
| Mo                  | 10.108722 | -4.765918 | 1.559784  |
| Mo                  | 10.068579 | -1.530918 | 1.504359  |
| Mo                  | 10.081623 | 1.588794  | 1.440842  |
| Mo                  | 12.851026 | -6.379848 | 1.582538  |
| Mo                  | 12.865377 | -3.181678 | 1.689526  |
| Mo                  | 12.763700 | 0.035330  | 1.502940  |
| S                   | 0.895362  | 1.588303  | 0.028704  |
| S                   | 0.859558  | 4.769124  | 0.080474  |
| S                   | 0.883168  | 7.948262  | 0.016827  |
| S                   | 3.639212  | -0.011464 | 0.014338  |
| S                   | 3.644338  | 3.182749  | 0.017701  |
| S                   | 3.632456  | 6.373595  | 0.023175  |
| S                   | 6.399274  | -1.580632 | -0.049156 |
| S                   | 6.392129  | 1.587561  | -0.065025 |
| S                   | 6.404590  | 4.795600  | -0.026827 |
| S                   | 9.206489  | -3.154271 | -0.036666 |
| S                   | 9.180052  | 0.018297  | -0.089122 |
| S                   | 9.204842  | 3.232097  | -0.062926 |
| S                   | 11.980631 | -4.734134 | 0.060029  |
| S                   | 11.927832 | -1.642835 | 0.021516  |
| S                   | 11.933440 | 1.652331  | -0.057633 |
| S                   | 0.884983  | 1.562272  | 3.156146  |
| S                   | 0.951464  | 4.748329  | 3.175665  |
| S                   | 0.795318  | 7.956276  | 3.112068  |
| S                   | 3.661200  | -0.012132 | 3.128248  |
| S                   | 3.698630  | 3.171317  | 3.136325  |
| S                   | 3.679515  | 6.379975  | 3.138968  |
| S                   | 6.496377  | -1.544740 | 3.067047  |
| S                   | 6.498669  | 1.567573  | 3.072371  |
| S                   | 6.458041  | 4.783260  | 3.079054  |
| S                   | 9.182726  | -3.119845 | 3.077378  |
| S                   | 11.910213 | -4.832375 | 3.158709  |
| S                   | 11.844621 | 1.570556  | 3.094202  |
| S                   | 9.169225  | 3.122523  | 3.058041  |
| C                   | 11.618547 | -1.221613 | 2.942676  |

|   |           |           |          |
|---|-----------|-----------|----------|
| O | 12.261981 | -2.119733 | 3.597151 |
| H | 10.686578 | -0.767537 | 3.458166 |

|                     |           |           |           |
|---------------------|-----------|-----------|-----------|
| CO* + H* = COH* + * |           |           |           |
| Mo                  | 1.855636  | -0.008993 | 1.575683  |
| Mo                  | 1.852098  | 3.180525  | 1.597631  |
| Mo                  | 1.867650  | 6.369683  | 1.578427  |
| Mo                  | 4.632224  | -1.599094 | 1.589277  |
| Mo                  | 4.629617  | 1.584524  | 1.600086  |
| Mo                  | 4.626478  | 4.770744  | 1.593075  |
| Mo                  | 7.384643  | -3.188661 | 1.568686  |
| Mo                  | 7.387154  | 0.012506  | 1.535722  |
| Mo                  | 7.400114  | 3.144309  | 1.571663  |
| Mo                  | 10.145837 | -4.813482 | 1.584694  |
| Mo                  | 10.228698 | -1.580761 | 1.573666  |
| Mo                  | 10.145739 | 1.518223  | 1.560752  |
| Mo                  | 12.889092 | -6.382707 | 1.590201  |
| Mo                  | 12.883454 | -3.166464 | 1.589625  |
| Mo                  | 12.903674 | -0.008697 | 1.459891  |
| S                   | 0.925697  | 1.595530  | 0.032215  |
| S                   | 0.940052  | 4.772495  | 0.032377  |
| S                   | 0.997769  | 7.959261  | -0.024967 |
| S                   | 3.709882  | -0.002176 | 0.032739  |
| S                   | 3.696040  | 3.176394  | 0.040595  |
| S                   | 3.716703  | 6.367671  | 0.027414  |
| S                   | 6.461551  | -1.594646 | 0.001437  |
| S                   | 6.448364  | 1.568729  | -0.001670 |
| S                   | 6.467625  | 4.762748  | 0.027241  |
| S                   | 9.239693  | -3.185839 | 0.017546  |
| S                   | 9.236419  | -0.052571 | 0.029228  |
| S                   | 9.246322  | 3.143947  | 0.012691  |
| S                   | 11.978614 | -4.785483 | 0.035224  |
| S                   | 11.988232 | -1.634272 | -0.075266 |
| S                   | 11.949799 | 1.630828  | -0.024859 |
| S                   | 0.927388  | 1.576029  | 3.149541  |
| S                   | 0.917886  | 4.794817  | 3.150372  |
| S                   | 0.886176  | 7.953793  | 3.101149  |
| S                   | 3.693053  | -0.014324 | 3.150039  |
| S                   | 3.702492  | 3.181297  | 3.159839  |
| S                   | 3.706662  | 6.372603  | 3.148896  |
| S                   | 6.514390  | -1.570725 | 3.123606  |
| S                   | 6.514344  | 1.561862  | 3.144466  |
| S                   | 6.485538  | 4.760733  | 3.130454  |
| S                   | 9.218866  | -3.188216 | 3.092904  |
| S                   | 11.969331 | -4.763504 | 3.162640  |
| S                   | 11.975534 | 1.512881  | 3.109783  |
| S                   | 9.232820  | 3.096954  | 3.128105  |
| C                   | 12.072693 | -1.571471 | 2.688167  |
| O                   | 11.823533 | -1.271168 | 3.633340  |
| H                   | 10.392073 | -0.319795 | 3.103852  |

|                       |           |           |           |
|-----------------------|-----------|-----------|-----------|
| CHO* + O* = HCOO* + * |           |           |           |
| Mo                    | 1.916080  | 0.004887  | 1.578641  |
| Mo                    | 1.889809  | 3.192121  | 1.612996  |
| Mo                    | 1.892996  | 6.377478  | 1.588366  |
| Mo                    | 4.652654  | -1.617143 | 1.529115  |
| Mo                    | 4.658902  | 1.578118  | 1.542704  |
| Mo                    | 4.643478  | 4.750959  | 1.545487  |
| Mo                    | 7.373759  | -3.245707 | 1.499327  |
| Mo                    | 7.390787  | -0.022348 | 1.441924  |
| Mo                    | 7.422319  | 3.121917  | 1.545075  |
| Mo                    | 10.177368 | -4.837140 | 1.602287  |
| Mo                    | 10.039649 | 1.623801  | 1.509755  |
| Mo                    | 10.262745 | 1.462861  | 1.622761  |
| Mo                    | 12.958189 | -6.357549 | 1.641631  |
| Mo                    | 12.941955 | -3.130074 | 1.688368  |
| Mo                    | 13.015258 | 0.027320  | 1.614488  |
| S                     | 0.958625  | 1.613059  | 0.047499  |
| S                     | 0.908924  | 4.781556  | 0.076566  |
| S                     | 0.980286  | 7.980169  | 0.012467  |
| S                     | 3.724903  | -0.009772 | -0.015140 |
| S                     | 3.690116  | 3.171406  | 0.002735  |
| S                     | 3.705197  | 6.349654  | -0.008576 |
| S                     | 6.460578  | -1.632123 | -0.075644 |
| S                     | 6.471705  | 1.583371  | -0.058891 |
| S                     | 6.472959  | 4.705737  | -0.033516 |
| S                     | 9.230977  | -3.328023 | -0.050239 |
| S                     | 9.258931  | -0.009327 | -0.031945 |
| S                     | 9.331526  | 3.085078  | 0.058514  |
| S                     | 12.056234 | -4.735674 | 0.102948  |
| S                     | 11.987516 | -1.595371 | 0.127847  |
| S                     | 12.071083 | 1.603594  | 0.062030  |
| S                     | 1.008173  | 1.589694  | 3.174873  |
| S                     | 0.999872  | 4.799963  | 3.192974  |
| S                     | 1.046758  | 8.000514  | 3.156332  |
| S                     | 3.774206  | -0.016905 | 3.110695  |
| S                     | 3.763910  | 3.166771  | 3.130817  |
| S                     | 3.761972  | 6.363502  | 3.116453  |
| S                     | 6.530661  | -1.597675 | 3.056146  |
| S                     | 6.540368  | 1.518425  | 3.086825  |
| S                     | 6.488969  | 4.735894  | 3.087146  |
| S                     | 9.137159  | -3.265216 | 3.083289  |
| S                     | 11.998084 | -4.757245 | 3.201451  |
| S                     | 12.075928 | 1.593072  | 3.184303  |
| S                     | 9.258071  | 3.068188  | 3.133209  |
| C                     | 11.085410 | -1.442678 | 3.284291  |
| O                     | 9.804636  | -0.200006 | 2.934095  |
| O                     | 12.401854 | -1.324171 | 3.186477  |
| H                     | 10.731975 | -1.657028 | 4.301934  |

|                       |          |           |          |
|-----------------------|----------|-----------|----------|
| COH* + O* = COOH* + * |          |           |          |
| Mo                    | 1.899551 | -0.066782 | 1.617617 |
| Mo                    | 1.914045 | 3.126867  | 1.600380 |
| Mo                    | 1.878983 | 6.313610  | 1.600700 |
| Mo                    | 4.671574 | -1.664913 | 1.598330 |
| Mo                    | 4.674113 | 1.526742  | 1.599376 |
| Mo                    | 4.665714 | 4.711935  | 1.595086 |

|    |           |           |           |
|----|-----------|-----------|-----------|
| Mo | 7.432628  | -3.259001 | 1.556966  |
| Mo | 7.411762  | -0.049154 | 1.492879  |
| Mo | 7.441529  | 3.090433  | 1.557291  |
| Mo | 10.206397 | -4.871198 | 1.524730  |
| Mo | 10.205530 | -1.672970 | 1.472583  |
| Mo | 10.232779 | 1.473577  | 1.540703  |
| Mo | 12.966490 | -6.415670 | 1.558423  |
| Mo | 12.963041 | -3.270025 | 1.502576  |
| Mo | 12.952580 | -0.038275 | 1.592640  |
| S  | 1.015949  | 1.527458  | 0.032531  |
| S  | 1.009808  | 4.703248  | 0.003626  |
| S  | 0.971643  | 7.927755  | 0.047605  |
| S  | 3.739164  | -0.072081 | 0.052692  |
| S  | 3.748757  | 3.117849  | 0.038192  |
| S  | 3.731575  | 6.313378  | 0.045746  |
| S  | 6.479390  | -1.676839 | -0.010880 |
| S  | 6.473525  | 1.528940  | -0.022463 |
| S  | 6.496325  | 4.701232  | 0.018305  |
| S  | 9.232796  | -3.294190 | -0.052335 |
| S  | 9.260768  | -0.091613 | -0.024169 |
| S  | 9.282093  | 3.073791  | -0.031366 |
| S  | 12.053085 | -4.857131 | -0.043814 |
| S  | 12.084622 | -1.643378 | 0.001899  |
| S  | 12.069796 | 1.527608  | -0.000218 |
| S  | 0.977226  | 1.543391  | 3.157501  |
| S  | 0.923639  | 4.731907  | 3.131666  |
| S  | 0.940752  | 7.891314  | 3.165811  |
| S  | 3.756230  | -0.070116 | 3.165529  |
| S  | 3.757081  | 3.123625  | 3.165345  |
| S  | 3.740592  | 6.308194  | 3.157363  |
| S  | 6.578846  | -1.632997 | 3.115306  |
| S  | 6.572759  | 1.499597  | 3.129784  |
| S  | 6.535287  | 4.703279  | 3.122178  |
| S  | 9.302746  | -3.262739 | 3.055858  |
| S  | 12.025614 | -4.791995 | 3.097438  |
| S  | 12.043122 | 1.601434  | 3.123932  |
| S  | 9.295211  | 3.052945  | 3.096458  |
| C  | 10.397485 | -0.567241 | 3.182688  |
| O  | 11.641070 | -1.139072 | 3.053530  |
| O  | 9.952906  | -0.447256 | 4.434456  |
| H  | 8.984132  | -0.305290 | 4.410234  |

|   |           |           |           |
|---|-----------|-----------|-----------|
| S | 0.955396  | 1.524899  | 0.095469  |
| S | 0.917549  | 4.706491  | 0.116518  |
| S | 0.931550  | 7.902292  | 0.101134  |
| S | 3.699538  | -0.083849 | 0.059339  |
| S | 3.690465  | 3.089664  | 0.057334  |
| S | 3.691593  | 6.293048  | 0.055131  |
| S | 6.450684  | -1.665570 | -0.016993 |
| S | 6.468335  | 1.477134  | 0.003583  |
| S | 6.443545  | 4.646470  | -0.008318 |
| S | 9.230923  | -3.359303 | -0.074256 |
| S | 9.222940  | -0.018898 | -0.075130 |
| S | 9.280496  | 3.097645  | 0.007901  |
| S | 12.053535 | -4.813714 | 0.109700  |
| S | 11.964393 | -1.658345 | 0.159202  |
| S | 12.066402 | 1.516941  | 0.080216  |
| S | 0.967877  | 1.517402  | 3.225252  |
| S | 0.987803  | 4.703841  | 3.229828  |
| S | 0.979652  | 7.908915  | 3.216643  |
| S | 3.755471  | -0.089097 | 3.182257  |
| S | 3.756573  | 3.096382  | 3.182532  |
| S | 3.751554  | 6.292319  | 3.174227  |
| S | 6.552572  | -1.690186 | 3.110857  |
| S | 6.559182  | 1.453008  | 3.120266  |
| S | 6.499177  | 4.676863  | 3.108550  |
| S | 9.155422  | -3.276841 | 3.105905  |
| S | 11.967672 | -4.834749 | 3.209886  |
| S | 11.967208 | 1.538202  | 3.179298  |
| S | 9.238060  | 3.035664  | 3.127338  |
| C | 11.110729 | -1.339640 | 3.138624  |
| O | 12.375784 | -1.690597 | 3.252254  |
| O | 10.483598 | -0.708293 | 4.057339  |
| H | 9.496657  | -0.294124 | 3.114434  |

2H\* = H<sub>2</sub> + 2\*

|    |           |           |           |
|----|-----------|-----------|-----------|
| Mo | 1.825184  | -0.004604 | 1.607223  |
| Mo | 1.831349  | 3.194332  | 1.618353  |
| Mo | 1.812661  | 6.382109  | 1.574321  |
| Mo | 4.616695  | -1.578401 | 1.602234  |
| Mo | 4.616894  | 1.597030  | 1.609656  |
| Mo | 4.612839  | 4.793036  | 1.597351  |
| Mo | 7.397168  | -3.149204 | 1.561825  |
| Mo | 7.419275  | 0.032152  | 1.536674  |
| Mo | 7.394392  | 3.181720  | 1.542898  |
| Mo | 10.153366 | -4.762266 | 1.553007  |
| Mo | 10.169027 | -1.527002 | 1.571894  |
| Mo | 10.118934 | 1.560822  | 1.461572  |
| Mo | 12.877045 | -6.383928 | 1.594164  |
| Mo | 12.881516 | -3.145507 | 1.552367  |
| Mo | 12.847426 | -0.029764 | 1.482006  |
| S  | 9.920689  | 1.598136  | 0.058387  |
| S  | 9.908339  | 4.765211  | 0.018414  |
| S  | 9.920776  | 7.986895  | -0.007039 |
| S  | 3.678655  | 0.009549  | 0.055615  |
| S  | 3.677815  | 3.189162  | 0.055268  |
| S  | 3.687780  | 6.391176  | 0.041156  |
| S  | 6.449088  | -1.555020 | 0.011675  |
| S  | 6.435076  | 1.579994  | 0.000156  |
| S  | 6.449800  | 4.808134  | 0.018698  |
| S  | 9.260981  | -3.106752 | 0.012012  |
| S  | 9.217423  | -0.039330 | -0.023577 |
| S  | 9.229656  | 3.212397  | -0.041968 |
| S  | 12.006021 | -4.771198 | 0.014594  |
| S  | 11.935461 | -1.613375 | -0.011898 |
| S  | 11.987697 | 1.616208  | -0.045692 |
| S  | 0.897423  | 1.585693  | 3.172353  |
| S  | 0.864821  | 4.831346  | 3.147446  |
| S  | 0.816890  | 7.390950  | 3.114463  |
| S  | 3.679964  | -0.000632 | 3.168993  |
| S  | 3.695382  | 3.200838  | 3.169152  |
| S  | 3.671373  | 6.388150  | 3.145935  |
| S  | 6.526245  | -1.545762 | 3.122705  |
| S  | 6.530816  | 1.591285  | 3.127556  |
| S  | 6.492625  | 4.792288  | 3.116386  |
| S  | 9.256117  | -3.136433 | 3.093025  |
| S  | 11.961007 | -4.724632 | 3.127165  |
| S  | 11.874886 | 1.466548  | 3.073854  |
| S  | 9.235119  | 3.122317  | 3.074956  |
| H  | 10.868484 | -1.019932 | 4.018598  |
| H  | 10.208916 | -0.635610 | 4.009266  |

CHO\* + \* = CH\* + O\*

|    |           |           |           |
|----|-----------|-----------|-----------|
| Mo | 1.803094  | 0.005714  | 1.629787  |
| Mo | 1.820283  | 3.204999  | 1.619612  |
| Mo | 1.784299  | 6.389493  | 1.614987  |
| Mo | 4.586472  | -1.583011 | 1.615925  |
| Mo | 4.589309  | 1.588398  | 1.622964  |
| Mo | 4.577829  | 4.786302  | 1.607981  |
| Mo | 7.338522  | -3.189313 | 1.521240  |
| Mo | 7.401501  | -0.007862 | 1.523049  |
| Mo | 7.354924  | 3.173066  | 1.555614  |
| Mo | 10.110613 | -4.771136 | 1.499017  |
| Mo | 10.042773 | -1.590384 | 1.358154  |
| Mo | 10.166696 | 1.574997  | 1.505541  |
| Mo | 12.874925 | -6.328153 | 1.559768  |
| Mo | 12.862061 | -3.156280 | 1.508539  |
| Mo | 12.773888 | 0.060707  | 1.571063  |
| S  | 9.935049  | 1.608909  | 0.045218  |
| S  | 9.919326  | 4.786762  | 0.022991  |
| S  | 0.868836  | 7.999342  | 0.064459  |
| S  | 3.647832  | 0.004653  | 0.069086  |
| S  | 3.660620  | 3.182383  | 0.061589  |
| S  | 3.641332  | 6.394256  | 0.064084  |
| S  | 6.389588  | -1.567387 | -0.001331 |
| S  | 6.401351  | 1.572462  | 0.017902  |
| S  | 6.383029  | 4.760454  | 0.005791  |
| S  | 9.119158  | -3.250353 | -0.120620 |
| S  | 9.151611  | 0.029439  | -0.119150 |

|   |           |           |           |
|---|-----------|-----------|-----------|
| S | 9.167750  | 3.182132  | -0.039743 |
| S | 11.977509 | -4.758237 | -0.041826 |
| S | 11.976309 | -1.566285 | -0.040879 |
| S | 11.998838 | 1.638400  | -0.037129 |
| S | 0.876595  | 1.617010  | 3.168106  |
| S | 0.823054  | 4.816366  | 3.147433  |
| S | 0.794551  | 7.967471  | 3.159742  |
| S | 3.659942  | -0.001802 | 3.187298  |
| S | 3.671049  | 3.197704  | 3.180224  |
| S | 3.651245  | 6.385588  | 3.169519  |
| S | 6.506445  | -1.581352 | 3.109676  |
| S | 6.508474  | 1.558576  | 3.121838  |
| S | 6.458203  | 4.788922  | 3.118643  |
| S | 9.205287  | -3.137549 | 3.013497  |
| S | 11.919162 | -4.693992 | 3.084576  |
| S | 11.939470 | 1.680219  | 3.118064  |
| S | 9.226354  | 3.157955  | 3.072588  |
| C | 9.870398  | -0.140374 | 2.827555  |
| O | 11.305166 | -1.022572 | 2.853210  |
| H | 9.500514  | -0.210806 | 3.856763  |

CHO\* + H\* = CH<sub>2</sub>O\* + \*

|    |           |           |           |
|----|-----------|-----------|-----------|
| Mo | 1.872377  | 0.002936  | 1.560649  |
| Mo | 1.841124  | 3.179766  | 1.595228  |
| Mo | 1.848787  | 6.371622  | 1.567791  |
| Mo | 4.609612  | -1.625819 | 1.510532  |
| Mo | 4.617470  | 1.566642  | 1.521894  |
| Mo | 4.591646  | 4.738103  | 1.522275  |
| Mo | 7.322802  | -3.257131 | 1.474394  |
| Mo | 7.347502  | -0.046803 | 1.428965  |
| Mo | 7.374843  | 3.109240  | 1.515579  |
| Mo | 10.115962 | -4.833205 | 1.585606  |
| Mo | 9.977488  | -1.692689 | 1.527075  |
| Mo | 10.184088 | 1.497449  | 1.550103  |
| Mo | 12.898049 | -6.369226 | 1.631878  |
| Mo | 12.887671 | -3.144160 | 1.680035  |
| Mo | 12.967031 | 0.035920  | 1.594966  |
| S  | 0.899660  | 1.607461  | 0.033596  |
| S  | 0.854440  | 4.773181  | 0.062702  |
| S  | 0.937489  | 7.979122  | -0.001971 |
| S  | 3.681205  | -0.015489 | -0.033661 |
| S  | 3.640454  | 3.157485  | -0.018391 |
| S  | 3.659296  | 6.341918  | -0.029758 |
| S  | 6.415166  | -1.643344 | -0.099411 |
| S  | 6.431376  | 1.561378  | -0.085769 |
| S  | 6.419285  | 4.692181  | -0.059256 |
| S  | 9.173274  | -3.319842 | -0.073990 |
| S  | 9.227891  | -0.027291 | -0.037803 |
| S  | 9.270405  | 3.108568  | 0.010547  |
| S  | 11.998174 | -4.741693 | 0.094941  |
| S  | 11.938671 | -1.582998 | 0.132842  |
| S  | 12.028147 | 1.599542  | 0.036180  |
| S  | 0.955575  | 1.578973  | 3.160574  |
| S  | 0.961012  | 4.785008  | 3.170044  |
| S  | 1.008443  | 8.000369  | 3.133836  |
| S  | 3.732839  | -0.023787 | 3.091849  |
| S  | 3.717690  | 3.153398  | 3.110221  |
| S  | 3.717184  | 6.353493  | 3.094355  |
| S  | 6.490141  | -1.615472 | 3.037909  |
| S  | 6.499935  | 1.503485  | 3.060694  |
| S  | 6.435649  | 4.718466  | 3.057955  |
| S  | 9.060815  | -3.264306 | 3.088532  |
| S  | 11.943351 | -4.773754 | 3.190746  |
| S  | 11.972464 | 1.570004  | 3.168075  |
| S  | 9.197587  | 3.056291  | 3.105791  |
| C  | 11.163377 | -1.633159 | 3.225984  |
| O  | 12.447587 | -1.364792 | 3.162242  |
| H  | 10.869151 | -1.956620 | 4.241754  |
| H  | 10.171626 | -0.373151 | 2.857095  |

CHO\* + H\* = CHOH\* + \*

|    |           |           |           |
|----|-----------|-----------|-----------|
| Mo | 1.804644  | -0.022658 | 1.599067  |
| Mo | 1.812500  | 3.180585  | 1.593683  |
| Mo | 1.776316  | 6.370687  | 1.570746  |
| Mo | 4.593112  | -1.595821 | 1.605510  |
| Mo | 4.580575  | 1.587481  | 1.602213  |
| Mo | 4.572895  | 4.783920  | 1.591964  |
| Mo | 7.358715  | -3.186205 | 1.570294  |
| Mo | 7.386229  | 0.019583  | 1.604358  |
| Mo | 7.337732  | 3.194326  | 1.555570  |
| Mo | 10.131224 | -4.785995 | 1.479615  |
| Mo | 10.165648 | -1.635660 | 1.518117  |
| Mo | 10.108018 | 1.594149  | 1.498673  |
| Mo | 12.874298 | -6.398848 | 1.566252  |
| Mo | 12.864148 | -3.190107 | 1.508444  |
| Mo | 12.798212 | -0.038783 | 1.547585  |
| S  | 9.921000  | 1.574176  | 0.031654  |
| S  | 9.901233  | 4.756090  | -0.010417 |
| S  | 0.864543  | 7.971401  | 0.013691  |
| S  | 3.660790  | -0.012296 | 0.048142  |
| S  | 3.661005  | 3.178383  | 0.037899  |
| S  | 3.654855  | 6.386147  | 0.039970  |
| S  | 6.433338  | -1.575425 | 0.040977  |
| S  | 6.417802  | 1.583339  | 0.027417  |
| S  | 6.402233  | 4.796489  | 0.014549  |
| S  | 9.177125  | -3.182932 | -0.058173 |
| S  | 9.197819  | -0.047654 | 0.015375  |
| S  | 9.147080  | 3.188708  | -0.055973 |
| S  | 12.009157 | -4.803569 | -0.049361 |
| S  | 11.945254 | -1.612501 | -0.036466 |
| S  | 11.982758 | 1.573179  | -0.022374 |
| S  | 0.886063  | 1.579466  | 3.152636  |
| S  | 0.831825  | 4.801531  | 3.116683  |
| S  | 0.805507  | 7.922617  | 3.131071  |
| S  | 3.655177  | -0.014292 | 3.164373  |
| S  | 3.655533  | 3.190655  | 3.157877  |
| S  | 3.632636  | 6.375938  | 3.145387  |

|   |           |           |          |
|---|-----------|-----------|----------|
| S | 6.481926  | -1.585393 | 3.156318 |
| S | 6.440940  | 1.608069  | 3.149861 |
| S | 6.436618  | 4.786543  | 3.133301 |
| S | 9.245269  | -3.246898 | 3.052105 |
| S | 11.937790 | -4.747341 | 3.073452 |
| S | 11.893693 | 1.548799  | 3.114497 |
| S | 9.221747  | 3.205677  | 3.050557 |
| C | 9.123808  | 0.322126  | 3.044039 |
| O | 9.902297  | -0.747489 | 3.449369 |
| H | 8.839429  | 0.880655  | 3.951914 |
| H | 11.189862 | -0.759219 | 2.927854 |

COH\* + H\* = CHOH\* + \*

|    |           |           |           |
|----|-----------|-----------|-----------|
| Mo | 1.844002  | 0.018840  | 1.579023  |
| Mo | 1.838844  | 3.214874  | 1.591796  |
| Mo | 1.855528  | 6.400877  | 1.570611  |
| Mo | 4.638914  | -1.573389 | 1.587171  |
| Mo | 4.627389  | 1.603204  | 1.593712  |
| Mo | 4.632182  | 4.797999  | 1.587145  |
| Mo | 7.422170  | -3.147672 | 1.533170  |
| Mo | 7.424237  | 0.000811  | 1.512876  |
| Mo | 7.414047  | 3.163408  | 1.541198  |
| Mo | 10.137968 | -4.778408 | 1.531942  |
| Mo | 10.190323 | -1.565310 | 1.427034  |
| Mo | 10.165100 | 1.547460  | 1.490303  |
| Mo | 12.882990 | -6.355170 | 1.563270  |
| Mo | 12.853732 | -3.113028 | 1.512834  |
| Mo | 12.852569 | 0.021141  | 1.462826  |
| S  | 9.932051  | 1.623552  | 0.024393  |
| S  | 9.945327  | 4.808139  | 0.009109  |
| S  | 9.963315  | 7.992664  | -0.010964 |
| S  | 3.699525  | 0.017581  | 0.033025  |
| S  | 3.692981  | 3.201669  | 0.040071  |
| S  | 3.714054  | 6.395931  | 0.026072  |
| S  | 6.460686  | -1.556056 | -0.020165 |

|                                                     |           |           |           |
|-----------------------------------------------------|-----------|-----------|-----------|
| H                                                   | 10.861984 | 0.022634  | 3.851581  |
| H                                                   | 10.058481 | -1.504642 | 4.361380  |
| <hr/>                                               |           |           |           |
| <b>CHOH* + * = CH* + OH*</b>                        |           |           |           |
| <hr/>                                               |           |           |           |
| Mo                                                  | 1.833575  | 0.003576  | 1.580580  |
| Mo                                                  | 1.836053  | 3.202050  | 1.583570  |
| Mo                                                  | 1.813245  | 6.391256  | 1.550552  |
| Mo                                                  | 4.607661  | -1.585749 | 1.579495  |
| Mo                                                  | 4.612273  | 1.587342  | 1.583619  |
| Mo                                                  | 4.599963  | 4.776745  | 1.575222  |
| Mo                                                  | 7.334111  | -3.192642 | 1.569291  |
| Mo                                                  | 7.419164  | -0.035511 | 1.578273  |
| Mo                                                  | 7.381364  | 3.180719  | 1.567109  |
| Mo                                                  | 10.148954 | -4.760961 | 1.558742  |
| Mo                                                  | 10.225457 | -1.517043 | 1.670005  |
| Mo                                                  | 10.169983 | 1.585750  | 1.524118  |
| Mo                                                  | 12.891023 | -6.349828 | 1.566908  |
| Mo                                                  | 12.891841 | -3.129410 | 1.525739  |
| Mo                                                  | 12.882323 | 0.002031  | 1.496944  |
| S                                                   | 0.928609  | 1.609632  | 0.025156  |
| S                                                   | 0.912427  | 4.780796  | -0.012639 |
| S                                                   | 0.917212  | 7.999923  | -0.023769 |
| S                                                   | 3.682185  | 0.005967  | 0.022726  |
| S                                                   | 3.681669  | 3.180139  | 0.022340  |
| S                                                   | 3.685414  | 6.384656  | 0.015446  |
| S                                                   | 6.450272  | -1.604557 | 0.007728  |
| S                                                   | 6.467096  | 1.566732  | 0.020044  |
| S                                                   | 6.439818  | 4.768494  | 0.009724  |
| S                                                   | 9.235676  | -3.112895 | 0.059708  |
| S                                                   | 9.272491  | -0.065136 | 0.005870  |
| S                                                   | 9.211511  | 3.211745  | -0.009671 |
| S                                                   | 11.994099 | -4.738445 | -0.011837 |
| S                                                   | 11.933401 | -1.569981 | 0.002677  |
| S                                                   | 12.019492 | 1.618706  | -0.039667 |
| S                                                   | 0.911016  | 1.604052  | 3.141833  |
| S                                                   | 0.869968  | 4.840925  | 3.119909  |
| S                                                   | 0.851622  | 7.942451  | 3.114509  |
| S                                                   | 3.676481  | -0.001913 | 3.144842  |
| S                                                   | 3.682512  | 3.189675  | 3.144421  |
| S                                                   | 3.661279  | 6.382398  | 3.121108  |
| S                                                   | 6.460736  | -1.590939 | 3.149172  |
| S                                                   | 6.481736  | 1.568874  | 3.131037  |
| S                                                   | 6.441554  | 4.763523  | 3.132295  |
| S                                                   | 9.183621  | -3.209637 | 3.086765  |
| S                                                   | 11.976102 | -4.697843 | 3.112650  |
| S                                                   | 11.966958 | 1.558750  | 3.101019  |
| S                                                   | 9.248360  | 3.174771  | 3.103789  |
| C                                                   | 9.171379  | 0.230212  | 2.810034  |
| O                                                   | 10.561013 | -0.903722 | 3.666137  |
| H                                                   | 9.890998  | 0.514951  | 3.847999  |
| H                                                   | 10.070133 | -1.500310 | 4.274282  |
| <hr/>                                               |           |           |           |
| <b>CH<sub>2</sub>O* + H* = CH<sub>3</sub>O* + *</b> |           |           |           |
| <hr/>                                               |           |           |           |
| Mo                                                  | 1.881798  | 0.004969  | 1.563890  |
| Mo                                                  | 1.869183  | 3.186718  | 1.579527  |
| Mo                                                  | 1.870296  | 6.374391  | 1.562059  |
| Mo                                                  | 4.626469  | -1.617241 | 1.522333  |
| Mo                                                  | 4.635641  | 1.572841  | 1.526918  |
| Mo                                                  | 4.621177  | 4.749664  | 1.525145  |
| Mo                                                  | 7.349692  | -3.228426 | 1.496393  |
| Mo                                                  | 7.366966  | -0.070080 | 1.462669  |
| Mo                                                  | 7.406205  | 3.122190  | 1.534502  |
| Mo                                                  | 10.150947 | -4.795213 | 1.613512  |
| Mo                                                  | 9.959001  | -1.559448 | 1.618740  |
| Mo                                                  | 10.216034 | 1.494113  | 1.565193  |
| Mo                                                  | 12.916791 | -6.359814 | 1.627770  |
| Mo                                                  | 12.921682 | -3.146050 | 1.651631  |
| Mo                                                  | 12.966405 | 0.013368  | 1.607179  |
| S                                                   | 0.919194  | 1.606813  | 0.027939  |
| S                                                   | 0.892179  | 4.780620  | 0.037036  |
| S                                                   | 0.939412  | 7.978793  | 0.006747  |
| S                                                   | 3.696458  | -0.009373 | -0.025622 |
| S                                                   | 3.678562  | 3.164954  | -0.022105 |
| S                                                   | 3.687822  | 6.353129  | -0.027461 |
| S                                                   | 6.436143  | -1.620988 | -0.085327 |
| S                                                   | 6.467207  | 1.565217  | -0.058911 |
| S                                                   | 6.464376  | 4.709879  | -0.040903 |
| S                                                   | 9.235825  | -3.227982 | -0.011540 |
| S                                                   | 9.232032  | -0.005328 | -0.013273 |
| S                                                   | 9.299293  | 3.142272  | 0.032028  |
| S                                                   | 12.012585 | -4.738550 | 0.087991  |
| S                                                   | 11.890002 | -1.582201 | 0.153219  |
| S                                                   | 12.037708 | 1.597459  | 0.041868  |
| S                                                   | 0.975100  | 1.594075  | 3.150951  |
| S                                                   | 0.990951  | 4.784758  | 3.157879  |
| S                                                   | 1.014035  | 7.989395  | 3.137249  |
| S                                                   | 3.738914  | -0.014239 | 3.098454  |
| S                                                   | 3.735821  | 3.165013  | 3.107273  |
| S                                                   | 3.731488  | 6.358036  | 3.096262  |
| S                                                   | 6.495278  | -1.618061 | 3.071428  |
| S                                                   | 6.515840  | 1.507593  | 3.067557  |
| S                                                   | 6.460795  | 4.732699  | 3.071515  |
| S                                                   | 9.076913  | -3.221617 | 3.113333  |
| S                                                   | 11.978850 | -4.746271 | 3.191189  |
| S                                                   | 12.013298 | 1.577972  | 3.175899  |
| S                                                   | 9.235783  | 3.072447  | 3.115446  |
| C                                                   | 11.203432 | -1.336848 | 3.622354  |
| O                                                   | 12.453941 | -1.511818 | 3.029459  |
| H                                                   | 10.904843 | -2.243771 | 4.165128  |
| H                                                   | 11.258526 | -0.517314 | 4.361565  |
| H                                                   | 10.335119 | -0.304261 | 2.907520  |

|                                                      |          |           |          |
|------------------------------------------------------|----------|-----------|----------|
| <hr/>                                                |          |           |          |
| <b>CH<sub>2</sub>O* + H* = CH<sub>3</sub>OH* + *</b> |          |           |          |
| <hr/>                                                |          |           |          |
| Mo                                                   | 1.839251 | -0.016205 | 1.534283 |
| Mo                                                   | 1.854625 | 3.191333  | 1.535900 |
| Mo                                                   | 1.817552 | 6.358861  | 1.525075 |
| Mo                                                   | 4.587978 | -1.623412 | 1.551671 |

|    |           |           |           |
|----|-----------|-----------|-----------|
| Mo | 4.598773  | 1.589194  | 1.561222  |
| Mo | 4.622851  | 4.773444  | 1.558517  |
| Mo | 7.415913  | -3.187005 | 1.587633  |
| Mo | 7.310151  | -0.029369 | 1.671076  |
| Mo | 7.401152  | 3.159869  | 1.589237  |
| Mo | 10.177396 | -4.788777 | 1.528815  |
| Mo | 10.274501 | -1.646622 | 1.498467  |
| Mo | 10.246247 | 1.585399  | 1.539592  |
| Mo | 12.932541 | -6.366938 | 1.525990  |
| Mo | 12.883027 | -3.211668 | 1.453935  |
| Mo | 12.835660 | 0.017148  | 1.477168  |
| S  | 0.960311  | 1.591763  | -0.028917 |
| S  | 0.939835  | 4.763752  | -0.059962 |
| S  | 0.921080  | 7.963295  | -0.044549 |
| S  | 3.694157  | -0.012022 | -0.011997 |
| S  | 3.709519  | 3.185660  | -0.010879 |
| S  | 3.687691  | 6.351807  | -0.014897 |
| S  | 6.467799  | -1.604084 | 0.036180  |
| S  | 6.470921  | 1.568795  | 0.037651  |
| S  | 6.496252  | 4.771950  | 0.029080  |
| S  | 9.246710  | -3.185548 | -0.030803 |
| S  | 9.183909  | -0.037557 | 0.112321  |
| S  | 9.243676  | 3.151023  | 0.002193  |
| S  | 12.000996 | -4.805912 | -0.071495 |
| S  | 12.010785 | -1.605622 | -0.083573 |
| S  | 12.007450 | 1.619630  | -0.067775 |
| S  | 0.952155  | 1.595019  | 3.097908  |
| S  | 0.856379  | 4.797624  | 3.070742  |
| S  | 0.840943  | 7.935185  | 3.064151  |
| S  | 3.661110  | -0.023885 | 3.109678  |
| S  | 3.678995  | 3.193763  | 3.114522  |
| S  | 3.649820  | 6.353601  | 3.102500  |
| S  | 6.373934  | -1.661744 | 3.143205  |
| S  | 6.393068  | 1.612996  | 3.152841  |
| S  | 6.479071  | 4.773813  | 3.130291  |
| S  | 9.335213  | -3.174385 | 3.095220  |
| S  | 12.001731 | -4.732759 | 3.083696  |
| S  | 12.056662 | 1.626153  | 3.112489  |
| S  | 9.279678  | 3.158775  | 3.100386  |
| C  | 8.670516  | -0.111026 | 3.504440  |
| O  | 10.013127 | -0.090561 | 2.942567  |
| H  | 8.589677  | 0.769205  | 4.158322  |
| H  | 8.565938  | -0.191444 | 4.110544  |
| H  | 11.166559 | -0.493243 | 3.047655  |

|                                           |           |           |           |
|-------------------------------------------|-----------|-----------|-----------|
| <hr/>                                     |           |           |           |
| <b>CHOH* + H* = CH<sub>2</sub>OH* + *</b> |           |           |           |
| <hr/>                                     |           |           |           |
| Mo                                        | 1.865608  | -0.052343 | 1.594084  |
| Mo                                        | 1.888840  | 3.134080  | 1.606858  |
| Mo                                        | 1.849147  | 6.331575  | 1.628006  |
| Mo                                        | 4.638964  | -1.631898 | 1.581869  |
| Mo                                        | 4.645609  | 1.553659  | 1.571767  |
| Mo                                        | 4.637430  | 4.747655  | 1.588718  |
| Mo                                        | 7.407926  | -3.201188 | 1.558611  |
| Mo                                        | 7.381301  | -0.015626 | 1.469558  |
| Mo                                        | 7.399964  | 3.137089  | 1.538309  |
| Mo                                        | 10.167907 | -4.810163 | 1.574216  |
| Mo                                        | 10.174832 | -1.532517 | 1.554201  |
| Mo                                        | 10.173338 | 1.525685  | 1.495781  |
| Mo                                        | 12.926769 | -6.405047 | 1.552550  |
| Mo                                        | 12.922934 | -3.263462 | 1.674639  |
| Mo                                        | 12.841430 | 0.031898  | 1.570373  |
| S                                         | 0.982920  | 1.523230  | 0.017510  |
| S                                         | 0.924297  | 4.735085  | 0.075489  |
| S                                         | 0.936902  | 7.914158  | 0.045646  |
| S                                         | 3.705433  | -0.047965 | 0.027307  |
| S                                         | 3.711334  | 3.156091  | 0.027503  |
| S                                         | 3.680929  | 6.337522  | 0.047076  |
| S                                         | 6.453010  | -1.641237 | -0.025318 |
| S                                         | 6.448282  | 1.569291  | -0.047871 |
| S                                         | 6.469958  | 4.761103  | 0.010968  |
| S                                         | 9.249645  | -3.197769 | -0.002871 |
| S                                         | 9.240524  | -0.027578 | -0.035524 |
| S                                         | 9.254943  | 3.168463  | -0.017621 |
| S                                         | 12.016629 | -4.774355 | 0.032750  |
| S                                         | 12.014079 | -1.656453 | 0.091373  |
| S                                         | 11.987466 | 1.600348  | -0.041645 |
| S                                         | 0.950438  | 1.535671  | 3.146391  |
| S                                         | 0.993583  | 4.706840  | 3.186276  |
| S                                         | 0.873876  | 7.934817  | 3.153731  |
| S                                         | 3.724603  | -0.039708 | 3.141686  |
| S                                         | 3.750748  | 3.137012  | 3.150787  |
| S                                         | 3.729542  | 6.345179  | 3.158782  |
| S                                         | 6.537893  | -1.581858 | 3.101539  |
| S                                         | 6.538995  | 1.527435  | 3.100660  |
| S                                         | 6.508711  | 4.747585  | 3.115361  |
| S                                         | 9.262075  | -3.153513 | 3.100061  |
| S                                         | 11.978168 | -4.910268 | 3.144569  |
| S                                         | 11.962290 | 1.631498  | 3.108855  |
| S                                         | 9.234208  | 3.082627  | 3.083777  |
| C                                         | 11.601090 | -0.987510 | 3.167524  |
| O                                         | 12.136850 | -2.269129 | 3.555293  |
| H                                         | 11.574832 | -0.411953 | 4.107739  |
| H                                         | 10.254446 | -0.521802 | 3.034132  |
| H                                         | 12.868334 | -2.158957 | 4.210576  |

|                                                    |           |           |          |
|----------------------------------------------------|-----------|-----------|----------|
| <hr/>                                              |           |           |          |
| <b>CH<sub>2</sub>O* + * = CH<sub>3</sub>* + O*</b> |           |           |          |
| <hr/>                                              |           |           |          |
| Mo                                                 | 1.827383  | 0.017533  | 1.562046 |
| Mo                                                 | 1.831372  | 3.205243  | 1.572675 |
| Mo                                                 | 1.829590  | 6.397968  | 1.545883 |
| Mo                                                 | 4.618136  | -1.562157 | 1.538194 |
| Mo                                                 | 4.619870  | 1.612444  | 1.546407 |
| Mo                                                 | 4.613079  | 4.812133  | 1.538915 |
| Mo                                                 | 7.397739  | -3.126244 | 1.480072 |
| Mo                                                 | 7.427679  | 0.039323  | 1.448001 |
| Mo                                                 | 7.393345  | 3.199900  | 1.477097 |
| Mo                                                 | 10.141474 | -4.751685 | 1.492791 |
| Mo                                                 | 10.201279 | -1.548801 | 1.393143 |

|    |           |           |           |
|----|-----------|-----------|-----------|
| Mo | 10.094838 | 1.571242  | 1.431630  |
| Mo | 12.876254 | -6.374007 | 1.548776  |
| Mo | 12.853297 | -3.117805 | 1.505194  |
| Mo | 12.820148 | -0.039285 | 1.464811  |
| S  | 0.918124  | 1.612922  | 0.007610  |
| S  | 0.917814  | 4.787966  | -0.004560 |
| S  | 0.913437  | 7.999251  | -0.018876 |
| S  | 3.671593  | 0.026039  | -0.002249 |
| S  | 3.671641  | 3.206760  | 0.001821  |
| S  | 3.678974  | 6.406672  | -0.013828 |
| S  | 6.439813  | -1.544393 | -0.067642 |
| S  | 6.434517  | 1.599643  | -0.068602 |
| S  | 6.441197  | 4.820403  | -0.048827 |
| S  | 9.235742  | -3.151504 | -0.101445 |
| S  | 9.216114  | -0.002080 | -0.127109 |
| S  | 9.236856  | 3.211947  | -0.095953 |
| S  | 12.002905 | -4.767017 | -0.025212 |
| S  | 11.989490 | -1.602333 | -0.182917 |
| S  | 11.974595 | 1.619856  | -0.068191 |
| S  | 0.895856  | 1.602071  | 3.129664  |
| S  | 0.867907  | 4.827611  | 1.04202   |
| S  | 0.836249  | 7.969607  | 3.078382  |
| S  | 3.693608  | 0.018809  | 3.111167  |
| S  | 3.706441  | 3.214851  | 3.112593  |
| S  | 3.693278  | 6.408265  | 3.101031  |
| S  | 6.538311  | -1.524860 | 3.048456  |
| S  | 6.543392  | 1.595637  | 3.054680  |
| S  | 6.500912  | 4.819697  | 3.045836  |
| S  | 9.261851  | -3.053330 | 3.008228  |
| S  | 11.950988 | -4.729685 | 3.079367  |
| S  | 11.863801 | 1.507827  | 3.045827  |
| S  | 12.921741 | 3.152195  | 3.028038  |
| C  | 11.788516 | -1.473265 | 4.784893  |
| O  | 10.899447 | -1.544456 | 2.622714  |
| H  | 12.829327 | -1.238514 | 4.959501  |
| H  | 11.058686 | -0.666765 | 4.772482  |
| H  | 11.438325 | -2.490115 | 4.908662  |

|   |           |           |           |
|---|-----------|-----------|-----------|
| S | 3.682532  | 0.004783  | 0.051977  |
| S | 3.685699  | 3.184369  | 0.056700  |
| S | 3.676049  | 6.387725  | 0.047449  |
| S | 6.441647  | -1.594135 | 0.008316  |
| S | 6.443322  | 1.596888  | 0.011443  |
| S | 6.422118  | 4.782450  | 0.010043  |
| S | 9.185005  | -3.200610 | -0.076364 |
| S | 9.210565  | 0.012874  | -0.150811 |
| S | 9.195691  | 3.218547  | -0.028141 |
| S | 12.017938 | -4.774890 | -0.020401 |
| S | 11.996865 | -1.589101 | -0.056616 |
| S | 12.027631 | 1.605876  | -0.040978 |
| S | 9.008514  | 1.590629  | 3.171097  |
| S | 0.854336  | 4.814476  | 3.128598  |
| S | 0.821798  | 7.946122  | 3.126823  |
| S | 3.695885  | -0.005112 | 3.170420  |
| S | 3.702850  | 3.189656  | 3.170095  |
| S | 3.667614  | 6.390755  | 3.152100  |
| S | 6.522354  | -1.568286 | 3.118802  |
| S | 6.533977  | 1.562745  | 3.124980  |
| S | 6.479409  | 4.795416  | 3.131979  |
| S | 9.275298  | -3.094456 | 3.046647  |
| S | 11.950019 | -4.724036 | 3.101267  |
| S | 11.903454 | 1.550007  | 3.106287  |
| S | 9.254100  | 3.166034  | 3.061943  |
| C | 9.304905  | 0.010902  | 2.683550  |
| H | 9.241264  | 0.111747  | 3.773734  |
| H | 10.778397 | -0.756472 | 2.893002  |

|                                                  |           |           |          |
|--------------------------------------------------|-----------|-----------|----------|
| $\text{CH}_2^* + \text{H}^* = \text{CH}_3^* + *$ |           |           |          |
| Mo                                               | 1.840227  | 0.010287  | 1.599081 |
| Mo                                               | 1.858239  | 3.213781  | 1.589675 |
| Mo                                               | 1.831800  | 6.395407  | 1.559282 |
| Mo                                               | 4.624383  | -1.568101 | 1.584269 |
| Mo                                               | 4.628755  | 1.608595  | 1.600564 |
| Mo                                               | 4.621761  | 4.805668  | 1.582764 |
| Mo                                               | 7.395791  | -3.156464 | 1.534660 |
| Mo                                               | 7.435574  | 0.030636  | 1.541232 |
| Mo                                               | 7.387338  | 3.218500  | 1.553154 |
| Mo                                               | 10.172315 | -4.731081 | 1.528630 |
| Mo                                               | 10.132574 | -1.480869 | 1.445439 |
| Mo                                               | 10.125480 | 1.601949  | 1.537987 |

|    |           |           |           |
|----|-----------|-----------|-----------|
| Mo | 12.904166 | -6.353646 | 1.571580  |
| Mo | 12.937633 | -3.147947 | 1.482100  |
| Mo | 12.855531 | -0.030045 | 1.534432  |
| S  | 0.945748  | 1.608337  | 0.035414  |
| S  | 0.963735  | 4.782171  | -0.028296 |
| S  | 0.906651  | 8.007714  | 0.008045  |
| S  | 3.688052  | 0.023728  | 0.040847  |
| S  | 3.704492  | 3.197262  | 0.036208  |
| S  | 3.699551  | 6.404085  | 0.022525  |
| S  | 6.456393  | -1.562574 | 0.003601  |
| S  | 6.451388  | 1.613416  | 0.014127  |
| S  | 6.447160  | 4.806273  | -0.002165 |
| S  | 9.222894  | -3.174944 | -0.063474 |
| S  | 9.205123  | 0.068416  | -0.095567 |
| S  | 9.230885  | 3.220957  | -0.013865 |
| S  | 12.012730 | -4.772531 | -0.035648 |
| S  | 11.991055 | -1.573958 | -0.050570 |
| S  | 11.996725 | 1.610980  | -0.005696 |
| S  | 9.024371  | 1.619954  | 3.149617  |
| S  | 0.882792  | 4.840827  | 3.120456  |
| S  | 0.855870  | 7.942689  | 3.122258  |
| S  | 3.695979  | 0.010075  | 3.158079  |
| S  | 3.705086  | 3.214744  | 3.154651  |
| S  | 3.682426  | 6.402933  | 3.131941  |
| S  | 6.504216  | -1.562942 | 3.113212  |
| S  | 6.520946  | 1.601963  | 3.130216  |
| S  | 6.487098  | 4.822625  | 3.117064  |
| S  | 9.288098  | -3.087468 | 3.041971  |
| S  | 11.995930 | -4.680694 | 3.086630  |
| S  | 11.978392 | 1.569608  | 3.100232  |
| S  | 9.237933  | 3.253783  | 3.088717  |
| C  | 9.250302  | -0.083395 | 2.870213  |
| H  | 9.689626  | 0.910707  | 3.275155  |
| H  | 8.918893  | -0.404022 | 3.871160  |
| H  | 10.624505 | -0.745559 | 2.990760  |

|                                                  |          |           |          |
|--------------------------------------------------|----------|-----------|----------|
| $\text{CH}_2^* + \text{H}^* = \text{CH}_2^* + *$ |          |           |          |
| Mo                                               | 1.833236 | 0.003333  | 1.572332 |
| Mo                                               | 1.837964 | 3.200933  | 1.575594 |
| Mo                                               | 1.810969 | 6.391669  | 1.541944 |
| Mo                                               | 4.614187 | -1.584219 | 1.568293 |
| Mo                                               | 4.618117 | 1.589532  | 1.579202 |

|    |           |           |           |
|----|-----------|-----------|-----------|
| Mo | 4.605931  | 4.779616  | 1.556639  |
| Mo | 7.371410  | -3.196205 | 1.516047  |
| Mo | 7.423997  | 0.030903  | 1.524097  |
| Mo | 7.391575  | 3.151828  | 1.504844  |
| Mo | 10.146463 | -4.811076 | 1.505844  |
| Mo | 10.173583 | -1.568046 | 1.612629  |
| Mo | 10.127143 | 1.558497  | 1.456745  |
| Mo | 12.902644 | -6.346120 | 1.536416  |
| Mo | 12.881350 | -3.130102 | 1.524485  |
| Mo | 12.862273 | 0.001021  | 1.471455  |
| S  | 0.943885  | 1.607629  | 0.006677  |
| S  | 0.906263  | 4.782265  | -0.016969 |
| S  | 0.914545  | 7.999043  | -0.034302 |
| S  | 3.683239  | 0.005452  | 0.020073  |
| S  | 3.680527  | 3.179098  | 0.014597  |
| S  | 3.683689  | 6.390534  | 0.005627  |
| S  | 6.454176  | -1.562307 | -0.014091 |
| S  | 6.437414  | 1.548834  | -0.031488 |
| S  | 6.436470  | 4.770590  | -0.029225 |
| S  | 9.237312  | -3.165759 | -0.017547 |
| S  | 9.249413  | -0.076905 | -0.022091 |
| S  | 9.232390  | 3.164075  | -0.080891 |
| S  | 12.012345 | -4.742861 | -0.037322 |
| S  | 11.919521 | -1.578958 | -0.011245 |
| S  | 12.001431 | 1.625743  | -0.062514 |
| S  | 9.099320  | 1.604438  | 3.130773  |
| S  | 0.866506  | 4.837665  | 3.110832  |
| S  | 0.830994  | 7.943774  | 3.094680  |
| S  | 3.681558  | -0.005587 | 3.138387  |
| S  | 3.691397  | 3.198340  | 3.133314  |
| S  | 3.669830  | 6.381577  | 3.107687  |
| S  | 6.515169  | -1.571674 | 3.082134  |
| S  | 6.520595  | 1.584122  | 3.105670  |
| S  | 6.473374  | 4.759632  | 3.078635  |
| S  | 9.188807  | -3.275903 | 3.041701  |
| S  | 11.959078 | -4.717114 | 3.082450  |
| S  | 11.940127 | 1.575616  | 3.037401  |
| S  | 9.227705  | 3.104418  | 3.056207  |
| C  | 10.399476 | -1.051318 | 3.957202  |
| H  | 9.682342  | -0.183184 | 2.733845  |
| H  | 9.445700  | -1.147678 | 4.492917  |
| H  | 10.886853 | -0.115917 | 4.251903  |
| H  | 11.062196 | -1.881396 | 4.234475  |

## 6. Transition state of elementary reaction on Cu/MoS<sub>2-v</sub>(001)

|                                                       |           |           |           |
|-------------------------------------------------------|-----------|-----------|-----------|
| $\text{H}_2\text{O}^* + * = \text{OH}^* + \text{H}^*$ |           |           |           |
| Mo                                                    | 1.807130  | 0.008993  | 1.632995  |
| Mo                                                    | 1.820415  | 3.207366  | 1.621538  |
| Mo                                                    | 1.812335  | 6.396595  | 1.583169  |
| Mo                                                    | 4.587760  | -1.555831 | 1.644067  |
| Mo                                                    | 4.571119  | 1.636004  | 1.651396  |
| Mo                                                    | 4.588277  | 4.815764  | 1.627397  |
| Mo                                                    | 7.344282  | -3.117583 | 1.576597  |
| Mo                                                    | 7.315495  | 0.073049  | 1.612748  |
| Mo                                                    | 7.345412  | 3.235146  | 1.591928  |
| Mo                                                    | 10.125755 | -4.778725 | 1.486554  |
| Mo                                                    | 10.060545 | 1.614173  | 1.545130  |
| Mo                                                    | 12.851955 | -6.385992 | 1.580141  |
| Mo                                                    | 12.930437 | -3.172096 | 1.429045  |
| Mo                                                    | 12.901937 | -0.038006 | 1.469941  |
| Cu                                                    | 10.315911 | -1.850479 | 1.141735  |
| S                                                     | 0.903060  | 1.599023  | 0.061195  |
| S                                                     | 0.985581  | 4.758317  | -0.019622 |
| S                                                     | 0.941785  | 8.023487  | 0.000849  |
| S                                                     | 3.659747  | 0.034500  | 0.088556  |
| S                                                     | 3.670369  | 3.212157  | 0.074439  |
| S                                                     | 3.688266  | 6.418676  | 0.062103  |
| S                                                     | 6.411539  | -1.519007 | 0.064731  |
| S                                                     | 6.383798  | 1.629449  | 0.059029  |
| S                                                     | 6.413690  | 4.837836  | 0.043992  |
| S                                                     | 9.103384  | -3.309638 | -0.175503 |
| S                                                     | 9.168344  | -0.041791 | 0.091611  |
| S                                                     | 9.159027  | 3.184251  | -0.018124 |
| S                                                     | 11.975796 | -4.824497 | -0.048447 |
| S                                                     | 12.117964 | -1.601893 | -0.130016 |
| S                                                     | 11.914446 | 1.599315  | -0.002534 |
| S                                                     | 0.858273  | 1.609160  | 3.172992  |
| S                                                     | 0.828366  | 4.838836  | 3.122830  |
| S                                                     | 0.823451  | 7.934850  | 3.142049  |
| S                                                     | 3.642760  | 0.026031  | 3.206449  |
| S                                                     | 3.647298  | 3.234950  | 3.202427  |
| S                                                     | 3.638626  | 6.404280  | 3.176503  |
| S                                                     | 6.463358  | -1.544496 | 3.184593  |
| S                                                     | 6.430077  | 1.660102  | 3.191723  |
| S                                                     | 6.467507  | 4.852144  | 3.156871  |
| S                                                     | 9.385962  | -2.938044 | 2.946746  |
| S                                                     | 11.955338 | -4.687411 | 3.063613  |
| S                                                     | 11.911998 | 1.484423  | 3.092028  |
| S                                                     | 9.222379  | 3.251759  | 3.106020  |
| O                                                     | 0.979603  | 0.215558  | 2.836051  |
| H                                                     | 8.913984  | 0.556983  | 3.738066  |
| H                                                     | 10.830794 | -1.909482 | 2.674427  |

|                                             |          |           |          |
|---------------------------------------------|----------|-----------|----------|
| $\text{OH}^* + * = \text{O}^* + \text{H}^*$ |          |           |          |
| Mo                                          | 1.820378 | 0.045826  | 1.654236 |
| Mo                                          | 1.806669 | 3.220586  | 1.667536 |
| Mo                                          | 1.832517 | 6.425605  | 1.635662 |
| Mo                                          | 4.588259 | -1.587632 | 1.585551 |
| Mo                                          | 4.590461 | 1.599496  | 1.617655 |
| Mo                                          | 4.563123 | 4.776884  | 1.602343 |

|    |           |           |           |
|----|-----------|-----------|-----------|
| Mo | 7.309209  | -3.241598 | 1.452571  |
| Mo | 7.341427  | 0.027919  | 1.448979  |
| Mo | 7.355376  | 3.122427  | 1.542646  |
| Mo | 10.046923 | -4.813691 | 1.528509  |
| Mo | 10.141667 | 1.541905  | 1.595108  |
| Mo | 12.867463 | -6.302425 | 1.665284  |
| Mo | 12.863484 | -2.993263 | 1.635170  |
| Mo | 12.890744 | 0.054380  | 1.626110  |
| Cu | 9.915065  | -1.940048 | 1.088950  |
| S  | 0.886080  | 1.647630  | 0.102704  |
| S  | 0.896496  | 4.822156  | 0.100887  |
| S  | 0.913206  | 8.036673  | 0.072038  |
| S  | 3.635250  | 0.021033  | 0.064775  |
| S  | 3.615090  | 3.186026  | 0.072845  |
| S  | 3.643255  | 6.389220  | 0.042922  |
| S  | 6.378771  | -1.618203 | -0.050729 |
| S  | 6.364700  | 1.573893  | -0.033679 |
| S  | 6.346468  | 4.693520  | -0.015304 |
| S  | 9.009321  | -3.547739 | -0.273798 |
| S  | 9.214790  | -0.080694 | 0.077797  |
| S  | 9.233088  | 3.064769  | 0.004351  |
| S  | 11.974730 | -4.693435 | 0.086440  |
| S  | 11.972964 | -1.536632 | -0.001225 |
| S  | 11.987549 | 1.664385  | 0.075956  |
| S  | 0.889458  | 1.637700  | 3.235971  |
| S  | 0.885960  | 4.860997  | 3.209703  |
| S  | 0.903335  | 8.011326  | 3.213383  |
| S  | 3.694812  | 0.001709  | 3.182016  |
| S  | 3.682556  | 3.197734  | 3.196750  |
| S  | 3.696214  | 6.399587  | 3.175303  |
| S  | 6.525198  | -1.574639 | 3.053500  |
| S  | 6.505827  | 1.541439  | 3.125308  |
| S  | 6.458476  | 4.768037  | 3.083852  |
| S  | 9.194404  | -3.091618 | 2.937295  |
| S  | 11.872701 | -4.632459 | 3.147566  |
| S  | 11.922323 | 1.626695  | 3.223195  |
| S  | 9.175336  | 3.118683  | 3.122540  |
| O  | 12.130204 | -1.511738 | 2.795229  |
| H  | 11.203862 | -0.549412 | 2.138200  |

|                                                    |           |           |          |
|----------------------------------------------------|-----------|-----------|----------|
| $2\text{OH}^* = \text{H}_2\text{O}^* + \text{O}^*$ |           |           |          |
| Mo                                                 | 1.801925  | 0.073050  | 1.628394 |
| Mo                                                 | 1.768963  | 3.263143  | 1.644163 |
| Mo                                                 | 1.787157  | 6.455113  | 1.624069 |
| Mo                                                 | 4.557660  | -1.577673 | 1.581900 |
| Mo                                                 | 4.558078  | 1.608342  | 1.619010 |
| Mo                                                 | 4.527072  | 4.790382  | 1.598043 |
| Mo                                                 | 7.276835  | -3.253712 | 1.420651 |
| Mo                                                 | 7.318394  | -0.004795 | 1.480604 |
| Mo                                                 | 7.323978  | 3.119570  | 1.555880 |
| Mo                                                 | 10.010024 | -4.813760 | 1.471665 |
| Mo                                                 | 10.185082 | 1.588696  | 1.632144 |
| Mo                                                 | 12.856084 | -6.245471 | 1.622493 |
| Mo                                                 | 12.772803 | -2.941043 | 1.615876 |
| Mo                                                 | 12.868855 | 0.108713  | 1.596906 |
| Cu                                                 | 9.925268  | -2.033428 | 0.926523 |

|   |           |           |           |
|---|-----------|-----------|-----------|
| S | 0.878898  | 1.685538  | 0.069573  |
| S | 0.826879  | 4.871186  | 0.092947  |
| S | 0.892448  | 8.065850  | 0.048683  |
| S | 3.621580  | 0.038423  | 0.051700  |
| S | 3.589014  | 3.202825  | 0.064537  |
| S | 3.606762  | 0.642981  | 0.039710  |
| S | 3.625380  | -1.596064 | -0.059522 |
| S | 3.653165  | 1.558726  | -0.008321 |
| S | 3.601857  | 4.669582  | -0.017934 |
| S | 8.932116  | -3.579688 | -0.336378 |
| S | 9.234710  | -0.064010 | 0.107401  |
| S | 9.189476  | 3.032268  | 0.000206  |
| S | 11.956318 | 4.638482  | 0.040465  |
| S | 11.912051 | -1.457458 | -0.029915 |
| S | 11.978422 | 1.706146  | 0.063051  |
| S | 0.869685  | 1.678707  | 3.198667  |
| S | 0.805874  | 4.899345  | 3.185179  |
| S | 0.874249  | 8.049091  | 3.192798  |
| S | 3.656734  | 0.010493  | 3.174824  |
| S | 3.635708  | 3.220338  | 3.185100  |
| S | 3.649265  | 6.414217  | 3.167396  |
| S | 3.482138  | -1.608456 | 3.048470  |
| S | 3.463745  | 1.553983  | 3.128793  |
| S | 3.424165  | 4.778375  | 3.078749  |
| S | 9.158880  | -3.129564 | 2.888515  |
| S | 11.825918 | -4.597656 | 3.106877  |
| S | 11.993169 | 1.715774  | 3.193213  |
| S | 9.172989  | 3.173454  | 3.119471  |
| O | 11.988162 | -1.355462 | 2.746398  |
| O | 9.831314  | -0.148648 | 3.017129  |
| H | 10.797145 | -0.891156 | 2.954442  |
| H | 9.728027  | 0.135159  | 3.947630  |

|   |           |           |           |
|---|-----------|-----------|-----------|
| S | 6.433533  | 1.587886  | 0.041029  |
| S | 6.416895  | 4.804256  | 0.003637  |
| S | 9.120826  | -3.286482 | -0.102883 |
| S | 9.229304  | -0.104543 | 0.074696  |
| S | 9.171310  | 3.157851  | -0.045263 |
| S | 11.981386 | -4.799541 | -0.095003 |
| S | 11.996743 | -1.590081 | 0.031760  |
| S | 11.934425 | 1.618908  | -0.043643 |
| S | 0.885605  | 1.615553  | 3.115620  |
| S | 0.873604  | 4.830503  | 3.084117  |
| S | 0.861148  | 7.953104  | 3.104368  |
| S | 3.665194  | 0.022561  | 3.171876  |
| S | 3.660867  | 3.216812  | 3.153844  |
| S | 3.652934  | 6.402068  | 3.134151  |
| S | 6.490947  | -1.551695 | 3.174729  |
| S | 6.442258  | 1.658428  | 3.174923  |
| S | 6.409294  | 4.779053  | 3.144298  |
| S | 9.152791  | -3.270516 | 3.056598  |
| S | 11.971989 | -4.675199 | 3.021511  |
| S | 11.958390 | 1.565006  | 3.067920  |
| S | 9.231589  | 3.225894  | 3.084490  |
| C | 10.474688 | -1.010548 | 3.371807  |
| O | 10.659447 | -0.964108 | 4.514929  |
| O | 9.062276  | 0.342573  | 2.795058  |

CO\* + OH\* = COOH\* + \*

|    |           |           |           |
|----|-----------|-----------|-----------|
| Mo | 1.843131  | -0.039636 | 1.597874  |
| Mo | 1.843111  | 0.014908  | 1.562559  |
| Mo | 1.842140  | 3.217089  | 1.545640  |
| Mo | 1.805812  | 6.407029  | 1.561307  |
| Mo | 4.600250  | -1.608939 | 1.520841  |
| Mo | 4.596671  | 1.583369  | 1.548569  |
| Mo | 4.568243  | 4.763646  | 1.532641  |
| Mo | 7.327869  | -3.271002 | 1.407118  |
| Mo | 7.322664  | -0.004243 | 1.412822  |
| Mo | 7.357712  | 3.112397  | 1.517361  |
| Mo | 10.070429 | -4.839160 | 1.422663  |
| Mo | 10.235507 | 1.670921  | 1.615903  |
| Mo | 12.907418 | -6.274667 | 1.526692  |
| Mo | 12.917757 | -3.153909 | 1.419458  |
| Mo | 12.870760 | 0.172262  | 1.653031  |
| Cu | 9.879661  | -2.013163 | 1.091461  |
| S  | 0.943317  | 1.616373  | -0.017470 |
| S  | 0.947831  | 4.803391  | -0.056370 |
| S  | 0.880559  | 8.006255  | 0.010803  |
| S  | 3.664683  | -0.004230 | -0.013182 |
| S  | 3.662926  | 3.171245  | -0.022592 |
| S  | 3.640555  | 6.378244  | -0.017313 |
| S  | 6.401798  | -1.633751 | -0.109054 |
| S  | 6.388578  | 1.564422  | -0.075570 |
| S  | 6.364297  | 4.670329  | -0.059688 |
| S  | 9.003959  | -3.547429 | -0.332427 |
| S  | 9.267090  | -0.064830 | 0.125583  |
| S  | 9.217933  | 3.024811  | -0.034320 |
| S  | 11.955983 | -4.752189 | -0.108548 |
| S  | 11.873755 | -1.493261 | 0.179086  |
| S  | 11.993556 | 1.661112  | 0.019698  |
| S  | 0.935860  | 1.648918  | 3.104846  |
| S  | 0.851411  | 4.826527  | 3.082696  |
| S  | 0.926555  | 8.011580  | 3.159309  |
| S  | 3.699260  | -0.016131 | 3.105548  |
| S  | 3.677567  | 3.188144  | 3.112311  |
| S  | 3.675945  | 6.381337  | 3.097254  |
| S  | 6.518329  | -1.612222 | 3.007667  |
| S  | 6.487923  | 1.522048  | 3.077820  |
| S  | 6.441283  | 4.758756  | 3.041403  |
| S  | 9.186581  | -3.190102 | 2.918548  |
| S  | 11.917886 | -4.624896 | 3.011287  |
| S  | 12.047393 | 1.848370  | 3.185586  |
| S  | 9.203524  | 3.180597  | 3.089764  |
| C  | 11.591813 | -0.692824 | 3.238744  |
| O  | 11.725104 | -1.349562 | 4.223809  |
| O  | 10.086533 | -0.109888 | 3.065256  |
| H  | 9.695609  | -0.022627 | 3.962844  |

CO\* + H\* = CHO\* + \*

|    |           |           |           |
|----|-----------|-----------|-----------|
| Mo | 1.856035  | -0.000423 | 1.592431  |
| Mo | 1.849692  | 3.194424  | 1.608964  |
| Mo | 1.819720  | 6.386771  | 1.609326  |
| Mo | 4.613051  | -1.611347 | 1.553282  |
| Mo | 4.610896  | 1.576839  | 1.574472  |
| Mo | 4.585061  | 4.757763  | 1.567333  |
| Mo | 7.345864  | -3.260013 | 1.435052  |
| Mo | 7.344610  | 0.010500  | 1.441210  |
| Mo | 7.371289  | 3.125119  | 1.526531  |
| Mo | 10.098317 | -4.832231 | 1.475707  |
| Mo | 10.173715 | 1.609867  | 1.557355  |
| Mo | 12.902587 | -6.320895 | 1.585382  |
| Mo | 12.921546 | -3.180853 | 1.548743  |
| Mo | 12.901734 | 0.154115  | 1.610462  |
| Cu | 9.866522  | -1.941450 | 1.144243  |
| S  | 0.939862  | 1.608329  | 0.034710  |
| S  | 0.925886  | 4.779013  | 0.029489  |
| S  | 0.929330  | 7.978761  | 0.020642  |
| S  | 3.676409  | -0.012516 | 0.015146  |
| S  | 3.658137  | 3.167119  | 0.020087  |
| S  | 3.648138  | 6.365475  | 0.021999  |
| S  | 6.410688  | -1.628242 | -0.077223 |
| S  | 6.397442  | 1.564763  | -0.058791 |
| S  | 6.373096  | 4.687062  | -0.040061 |
| S  | 9.047087  | -3.505564 | -0.280491 |
| S  | 9.261437  | -0.048390 | 0.119302  |
| S  | 9.231679  | 3.084733  | -0.037834 |
| S  | 11.996206 | -4.756410 | -0.020257 |
| S  | 11.905302 | -1.551798 | 0.200978  |
| S  | 11.998904 | 1.663628  | 0.012556  |
| S  | 0.936382  | 1.604155  | 3.157590  |

|   |           |           |          |
|---|-----------|-----------|----------|
| S | 0.896820  | 4.802962  | 3.161034 |
| S | 0.916506  | 7.999450  | 3.173495 |
| S | 3.713188  | -0.022525 | 3.137007 |
| S | 3.705927  | 3.172779  | 3.152541 |
| S | 3.700415  | 6.374145  | 3.136080 |
| S | 6.539789  | -1.601714 | 3.034872 |
| S | 6.507770  | 1.534178  | 3.095014 |
| S | 6.465827  | 4.760655  | 3.065420 |
| S | 9.204425  | -3.151656 | 2.957099 |
| S | 11.928070 | -4.707639 | 3.093463 |
| S | 11.957821 | 1.731328  | 3.188018 |
| S | 9.197614  | 3.162687  | 3.098291 |
| C | 11.670043 | -0.824949 | 3.094380 |
| O | 11.872990 | -1.709295 | 3.907681 |
| H | 10.586971 | -0.369870 | 3.049478 |

CO\* + H\* = COH\* + \*

|    |           |           |           |
|----|-----------|-----------|-----------|
| Mo | 1.792296  | -0.018008 | 1.595518  |
| Mo | 1.813943  | 3.155687  | 1.598021  |
| Mo | 1.854800  | 6.352614  | 1.578617  |
| Mo | 4.575058  | -1.614974 | 1.586468  |
| Mo | 4.578984  | 1.573257  | 1.600889  |
| Mo | 4.575442  | 4.756332  | 1.576200  |
| Mo | 7.300575  | -3.187556 | 1.498696  |
| Mo | 7.311116  | -0.005264 | 1.499830  |
| Mo | 7.335798  | 3.154946  | 1.535889  |
| Mo | 10.062427 | -4.809021 | 1.481717  |
| Mo | 10.019187 | 1.596400  | 1.478145  |
| Mo | 12.811807 | -6.364855 | 1.585563  |
| Mo | 12.881590 | -3.192534 | 1.469691  |
| Mo | 12.896530 | -0.072335 | 1.515670  |
| Cu | 10.338051 | -1.866548 | 1.181583  |
| S  | 0.852506  | 1.577180  | 0.038900  |
| S  | 0.971872  | 4.751494  | 0.005822  |
| S  | 0.959826  | 7.939064  | 0.003026  |
| S  | 3.636485  | -0.015736 | 0.044324  |
| S  | 3.646450  | 3.150318  | 0.032443  |
| S  | 3.676041  | 6.359363  | 0.011935  |
| S  | 6.375287  | -1.603971 | -0.028237 |
| S  | 6.377268  | 1.553120  | -0.017507 |
| S  | 6.382607  | 4.745419  | -0.023114 |
| S  | 9.090608  | -3.347265 | -0.180473 |
| S  | 9.235572  | -0.132448 | 0.153242  |
| S  | 9.156760  | 3.137910  | -0.067404 |
| S  | 11.923418 | -4.828459 | -0.037420 |
| S  | 12.155035 | -1.634518 | -0.183565 |
| S  | 11.931880 | 1.568914  | 0.020999  |
| S  | 0.852485  | 1.580878  | 3.152355  |
| S  | 0.865787  | 4.764971  | 3.115923  |
| S  | 0.895904  | 7.929672  | 3.129457  |
| S  | 3.645453  | -0.021952 | 3.154028  |
| S  | 3.663780  | 3.168823  | 3.158572  |
| S  | 3.680340  | 6.348853  | 3.154627  |
| S  | 6.476066  | -1.570554 | 3.107478  |
| S  | 6.473535  | 1.561089  | 3.124797  |
| S  | 6.444279  | 4.779992  | 3.092058  |
| S  | 9.252818  | -2.992276 | 2.879281  |
| S  | 11.891082 | -4.704174 | 3.079802  |
| S  | 11.897486 | 1.429955  | 3.124602  |
| S  | 9.161385  | 3.164371  | 3.089424  |
| C  | 12.266086 | -1.598441 | 2.922822  |
| O  | 11.905673 | -1.612948 | 4.062298  |
| H  | 10.829159 | 1.078697  | 3.923483  |

CHO\* + O\* = HCOO\* + \*

|    |           |           |           |
|----|-----------|-----------|-----------|
| Mo | 1.852435  | 0.015522  | 1.655783  |
| Mo | 1.844446  | 3.221538  | 1.668824  |
| Mo | 1.833189  | 6.411440  | 1.635213  |
| Mo | 4.644618  | -1.548881 | 1.617782  |
| Mo | 4.614205  | 1.630738  | 1.643126  |
| Mo | 4.626000  | 4.822803  | 1.645197  |
| Mo | 7.414434  | -3.154385 | 1.549062  |
| Mo | 7.482593  | 0.052571  | 1.453844  |
| Mo | 7.396184  | 3.248537  | 1.567209  |
| Mo | 10.213973 | -4.772096 | 1.592628  |
| Mo | 10.103204 | 1.582326  | 1.447809  |
| Mo | 12.905177 | -6.374835 | 1.631324  |
| Mo | 12.839697 | -3.174158 | 1.577570  |
| Mo | 12.881869 | -0.023711 | 1.526300  |
| Cu | 9.983719  | -1.302492 | 0.208407  |
| S  | 0.951861  | 1.619640  | 0.097478  |
| S  | 0.919006  | 4.788932  | 0.086047  |
| S  | 0.956425  | 8.014551  | 0.055264  |
| S  | 3.690388  | 0.039905  | 0.083771  |
| S  | 3.677459  | 3.229615  | 0.100157  |
| S  | 3.692454  | 6.411034  | 0.084066  |
| S  | 6.462180  | -1.549117 | -0.002732 |
| S  | 6.398645  | 1.670489  | 0.030498  |
| S  | 6.423330  | 4.827163  | 0.027028  |
| S  | 9.200210  | -3.285272 | -0.057261 |
| S  | 8.993586  | 0.458570  | -0.465322 |
| S  | 9.235983  | 3.292614  | -0.010780 |
| S  | 12.022518 | -4.781286 | 0.048408  |
| S  | 12.110636 | -1.591314 | -0.155478 |
| S  | 12.009704 | 1.624399  | 0.002324  |
| S  | 9.021028  | 1.604758  | 3.216501  |
| S  | 0.849219  | 4.840956  | 3.183734  |
| S  | 0.846790  | 7.973497  | 3.174350  |
| S  | 3.718152  | 0.017264  | 3.203092  |
| S  | 3.709480  | 3.228870  | 3.218154  |
| S  | 3.704137  | 6.431931  | 3.188472  |
| S  | 6.581686  | -1.507581 | 3.085429  |
| S  | 6.564423  | 1.576264  | 3.094784  |
| S  | 6.522834  | 4.846557  | 3.156049  |
| S  | 9.373508  | -3.015768 | 3.129522  |
| S  | 12.001942 | -4.763629 | 3.195860  |
| S  | 11.892384 | 1.519653  | 3.085833  |

|   |           |           |          |
|---|-----------|-----------|----------|
| S | 9.264259  | 3.148771  | 3.088032 |
| C | 10.399400 | -1.496003 | 3.140392 |
| O | 9.336010  | -0.072356 | 2.418235 |
| O | 11.599100 | -1.556252 | 2.617125 |
| H | 10.301737 | -0.976955 | 4.103912 |

COH\* + O\* = COOH\* + \*

|    |           |           |           |
|----|-----------|-----------|-----------|
| Mo | 1.772815  | 0.012040  | 1.668939  |
| Mo | 1.808570  | 3.211562  | 1.626405  |
| Mo | 1.752550  | 6.401734  | 1.627435  |
| Mo | 4.568558  | -1.561838 | 1.638409  |
| Mo | 4.540817  | 1.619289  | 1.645140  |
| Mo | 4.528167  | 4.811539  | 1.618762  |
| Mo | 7.309908  | -3.209744 | 1.510512  |
| Mo | 7.353094  | 0.087432  | 1.553962  |
| Mo | 7.293780  | 3.226737  | 1.563378  |
| Mo | 10.090939 | -4.816067 | 1.435807  |
| Mo | 10.055358 | 1.685891  | 1.605062  |
| Mo | 12.852016 | -6.309214 | 1.603338  |
| Mo | 12.884380 | -3.200733 | 1.412928  |
| Mo | 12.722844 | 0.077250  | 1.694282  |
| Cu | 9.669027  | -1.749485 | 1.117641  |
| S  | 0.905153  | 1.593825  | 0.077568  |
| S  | 0.951299  | 4.779807  | -0.006914 |
| S  | 0.787445  | 8.015936  | 0.120670  |
| S  | 3.608795  | 0.014988  | 0.099468  |
| S  | 3.631614  | 3.199322  | 0.066568  |
| S  | 3.607455  | 6.431134  | 0.078342  |
| S  | 6.377516  | -1.553854 | 0.027079  |
| S  | 6.329802  | 1.645651  | 0.032579  |
| S  | 6.319176  | 4.781989  | 0.001322  |
| S  | 9.090972  | -3.419559 | -0.264906 |
| S  | 9.061292  | 0.123091  | -0.048931 |
| S  | 9.110841  | 3.150564  | -0.049782 |
| S  | 11.956715 | -4.820778 | -0.073158 |
| S  | 11.869272 | -1.890502 | 0.155577  |
| S  | 11.983509 | 1.620142  | 0.051423  |
| S  | 0.864875  | 1.645504  | 3.197220  |
| S  | 0.782366  | 4.817503  | 3.314840  |
| S  | 0.771903  | 7.962241  | 3.204984  |
| S  | 3.639731  | 0.013092  | 3.215877  |
| S  | 3.631795  | 3.226802  | 3.204350  |
| S  | 3.612886  | 6.412646  | 3.185214  |
| S  | 6.513496  | -1.566939 | 3.120743  |
| S  | 6.424999  | 1.633405  | 3.164455  |
| S  | 6.400683  | 4.827994  | 3.128646  |
| S  | 9.235697  | -3.088746 | 2.886763  |
| S  | 11.884505 | -4.620075 | 3.073640  |
| S  | 11.898017 | 1.773707  | 3.227539  |
| S  | 9.154366  | 3.293206  | 3.110337  |
| C  | 9.097882  | 0.368626  | 2.905610  |
| O  | 10.676929 | -0.352174 | 2.208914  |
| O  | 9.167487  | 0.239782  | 4.212950  |
| H  | 8.536083  | -0.452980 | 4.520595  |

|    |           |           |           |
|----|-----------|-----------|-----------|
| Mo | 1.736280  | 6.527719  | 1.587875  |
| Mo | 4.501552  | -1.487216 | 1.609361  |
| Mo | 4.492540  | 1.700565  | 1.644300  |
| Mo | 4.482506  | 4.886563  | 1.610755  |
| Mo | 7.248030  | -3.162779 | 1.513376  |
| Mo | 7.262804  | 0.116783  | 1.713847  |
| Mo | 7.266889  | 3.225202  | 1.623897  |
| Mo | 9.981382  | -4.725375 | 1.459054  |
| Mo | 10.221929 | 1.709449  | 1.624759  |
| Mo | 12.828608 | -6.160030 | 1.564369  |
| Mo | 12.803000 | -2.920153 | 1.513741  |
| Mo | 12.836619 | 0.205002  | 1.573368  |
| Cu | 9.825349  | -1.935888 | 1.098259  |
| S  | 0.861884  | 1.758951  | 0.034641  |
| S  | 0.823772  | 4.940163  | 0.015038  |
| S  | 0.832956  | 8.145017  | 0.024457  |
| S  | 3.588333  | 0.125295  | 0.059294  |
| S  | 3.576551  | 3.291804  | 0.059894  |
| S  | 3.592283  | 6.499012  | 0.036620  |
| S  | 6.364206  | -1.447325 | 0.059570  |
| S  | 6.340189  | 1.634593  | 0.097429  |
| S  | 6.287955  | 4.780775  | 0.036427  |
| S  | 8.881959  | -3.452958 | -0.292730 |
| S  | 9.126870  | 0.036093  | 0.239468  |
| S  | 9.091366  | 3.142029  | 0.007309  |
| S  | 11.878828 | -4.584876 | -0.028305 |
| S  | 11.782817 | -1.375477 | 0.106421  |
| S  | 11.950755 | 1.794281  | 0.002492  |
| S  | 0.824174  | 1.772370  | 3.163715  |
| S  | 0.757629  | 4.989325  | 3.149985  |
| S  | 0.810445  | 8.094131  | 3.172166  |
| S  | 3.571712  | 0.099885  | 3.190345  |
| S  | 3.557022  | 3.322335  | 3.185534  |
| S  | 3.565731  | 6.497587  | 3.165223  |
| S  | 6.344447  | -1.566500 | 3.148954  |
| S  | 6.314606  | 1.707417  | 3.227391  |
| S  | 6.346377  | 4.871656  | 3.138607  |
| S  | 9.106635  | -3.105599 | 2.968422  |
| S  | 11.831557 | -4.498513 | 3.053977  |
| S  | 12.021865 | 1.829517  | 3.174748  |
| S  | 9.174001  | 3.270326  | 3.124903  |
| C  | 9.919663  | 0.082367  | 3.016619  |
| O  | 8.674983  | -0.072168 | 3.347089  |
| O  | 10.757701 | -0.749212 | 3.540641  |
| H  | 11.908599 | -1.088626 | 2.834241  |

|                                 |           |           |           |
|---------------------------------|-----------|-----------|-----------|
| <b>2H* = H<sub>2</sub> + 2*</b> |           |           |           |
| Mo                              | 1.853206  | -0.021016 | 1.667830  |
| Mo                              | 1.861540  | 3.176483  | 1.663594  |
| Mo                              | 1.836092  | 6.360407  | 1.629673  |
| Mo                              | 4.607654  | -1.627054 | 1.629508  |
| Mo                              | 4.608209  | 1.577349  | 1.653396  |
| Mo                              | 4.608074  | 4.743308  | 1.636004  |
| Mo                              | 7.336880  | -3.222675 | 1.535832  |
| Mo                              | 7.295001  | -0.048129 | 1.508552  |
| Mo                              | 7.400447  | 3.119423  | 1.623008  |
| Mo                              | 10.129865 | -4.831402 | 1.596868  |
| Mo                              | 10.181131 | 1.580688  | 1.679831  |
| Mo                              | 12.918813 | -6.373034 | 1.661386  |
| Mo                              | 12.971683 | -3.187752 | 1.534075  |
| Mo                              | 12.944370 | -0.001475 | 1.571501  |
| Cu                              | 10.359662 | -1.992735 | 1.406011  |
| S                               | 0.938196  | 1.578324  | 0.107876  |
| S                               | 0.983335  | 4.733721  | 0.036856  |
| S                               | 0.951966  | 7.993112  | 0.055905  |
| S                               | 3.676471  | -0.018879 | 0.095199  |
| S                               | 3.682426  | 3.154524  | 0.086117  |
| S                               | 3.683976  | 6.346693  | 0.073405  |
| S                               | 6.392538  | -1.653204 | -0.005521 |
| S                               | 6.409162  | 1.557760  | 0.030215  |
| S                               | 6.425073  | 4.689400  | 0.047121  |
| S                               | 9.132228  | -3.379986 | -0.073929 |
| S                               | 9.303168  | -0.179294 | 0.360517  |
| S                               | 9.259371  | 3.077112  | 0.071498  |
| S                               | 11.993783 | -4.825745 | 0.051626  |
| S                               | 12.053861 | -1.599284 | 0.073140  |
| S                               | 11.990152 | 1.603365  | 0.090855  |
| S                               | 0.942896  | 1.589081  | 3.230106  |
| S                               | 0.889808  | 4.808142  | 3.192584  |
| S                               | 0.893347  | 7.918418  | 3.204043  |
| S                               | 3.703894  | -0.033536 | 3.211655  |
| S                               | 3.704756  | 3.173210  | 3.226286  |
| S                               | 3.686638  | 6.350556  | 3.191438  |
| S                               | 6.511301  | -1.605742 | 3.147384  |
| S                               | 6.500864  | 1.513885  | 3.166188  |
| S                               | 6.488285  | 4.760793  | 3.154083  |
| S                               | 9.286350  | -3.081421 | 3.041414  |
| S                               | 11.983571 | -4.693799 | 3.158413  |
| S                               | 12.038215 | 1.557870  | 3.210516  |
| S                               | 9.228668  | 3.167797  | 3.208637  |
| H                               | 10.040092 | -0.135035 | 3.341063  |
| H                               | 9.505471  | 0.382805  | 3.549401  |

|                            |           |           |          |
|----------------------------|-----------|-----------|----------|
| <b>CHO* + * = CH* + O*</b> |           |           |          |
| Mo                         | 1.852248  | 0.009079  | 1.642188 |
| Mo                         | 1.856173  | 3.194995  | 1.647785 |
| Mo                         | 1.862470  | 6.382056  | 1.625621 |
| Mo                         | 4.612226  | -1.610371 | 1.575965 |
| Mo                         | 4.621329  | 1.575901  | 1.602328 |
| Mo                         | 4.613525  | 4.748665  | 1.588828 |
| Mo                         | 7.303017  | -3.254377 | 1.467911 |
| Mo                         | 7.352522  | -0.033523 | 1.426987 |
| Mo                         | 7.397649  | 3.104139  | 1.541689 |
| Mo                         | 10.119022 | -4.859045 | 1.505056 |
| Mo                         | 10.268551 | 1.499304  | 1.593660 |
| Mo                         | 12.931670 | -6.327310 | 1.644065 |
| Mo                         | 12.917990 | -3.052834 | 1.596482 |

|    |           |           |           |
|----|-----------|-----------|-----------|
| Mo | 12.900160 | 0.014094  | 1.633566  |
| Cu | 9.882810  | -1.814381 | 1.199483  |
| S  | 0.945650  | 1.615158  | 0.080442  |
| S  | 0.945664  | 4.786830  | 0.070753  |
| S  | 0.925993  | 7.992715  | 0.080058  |
| S  | 3.662970  | -0.005500 | 0.048382  |
| S  | 3.664156  | 3.164399  | 0.053690  |
| S  | 3.674238  | 6.358774  | 0.035663  |
| S  | 6.390638  | -1.648889 | -0.065316 |
| S  | 6.402274  | 1.558380  | -0.039128 |
| S  | 6.408199  | 4.675822  | -0.029932 |
| S  | 9.106425  | -3.444399 | -0.195337 |
| S  | 9.209896  | -0.051297 | -0.023608 |
| S  | 9.258617  | 3.044053  | -0.019508 |
| S  | 12.023557 | -4.732159 | 0.058157  |
| S  | 11.999777 | -1.575266 | 0.004895  |
| S  | 12.064240 | 1.630405  | 0.055923  |
| S  | 0.947256  | 1.612506  | 3.216901  |
| S  | 0.920416  | 4.820102  | 3.201258  |
| S  | 0.929865  | 7.969942  | 3.202159  |
| S  | 3.722408  | -0.020760 | 3.168501  |
| S  | 3.725242  | 3.174339  | 3.181379  |
| S  | 3.727581  | 6.366029  | 3.159008  |
| S  | 6.527179  | -1.601380 | 3.057854  |
| S  | 6.537961  | 1.506103  | 3.097794  |
| S  | 6.495879  | 4.738067  | 3.093538  |
| S  | 9.325544  | -3.102965 | 2.917226  |
| S  | 11.925390 | -4.677422 | 3.128648  |
| S  | 12.040316 | 1.637125  | 3.249994  |
| S  | 9.250421  | 3.086731  | 3.096690  |
| O  | 10.611103 | -0.510742 | 2.457691  |
| O  | 12.142742 | -1.528584 | 2.783174  |
| H  | 10.424373 | -0.636395 | 3.531534  |

|                                         |           |           |           |
|-----------------------------------------|-----------|-----------|-----------|
| <b>CHO* + H* = CH<sub>2</sub>O* + *</b> |           |           |           |
| Mo                                      | 1.868193  | -0.009019 | 1.616775  |
| Mo                                      | 1.870152  | 3.185948  | 1.630095  |
| Mo                                      | 1.857960  | 6.373298  | 1.613483  |
| Mo                                      | 4.621463  | -1.615242 | 1.566544  |
| Mo                                      | 4.619160  | 1.566141  | 1.583302  |
| Mo                                      | 4.612141  | 4.740920  | 1.579066  |
| Mo                                      | 7.293455  | -3.263160 | 1.461795  |
| Mo                                      | 7.368481  | -0.059231 | 1.439865  |
| Mo                                      | 7.390062  | 3.104218  | 1.556717  |
| Mo                                      | 10.106224 | -4.901328 | 1.558696  |
| Mo                                      | 10.239187 | 1.557724  | 1.601658  |
| Mo                                      | 12.933272 | -6.349769 | 1.638918  |
| Mo                                      | 12.954955 | -3.136185 | 1.625761  |
| Mo                                      | 12.943716 | 0.045724  | 1.631453  |
| Cu                                      | 10.050009 | -2.017531 | 1.348388  |
| S                                       | 0.946249  | 1.604406  | 0.063810  |
| S                                       | 0.938020  | 4.774940  | 0.059966  |
| S                                       | 0.927080  | 7.974853  | 0.052276  |
| S                                       | 3.676565  | -0.018956 | 0.025847  |
| S                                       | 3.673056  | 3.158276  | 0.031121  |
| S                                       | 3.677698  | 6.354274  | 0.027543  |
| S                                       | 6.406480  | -1.624044 | -0.068732 |
| S                                       | 6.423401  | 1.535165  | -0.029078 |
| S                                       | 6.405083  | 4.665859  | -0.032805 |
| S                                       | 9.120342  | -3.434077 | -0.133662 |
| S                                       | 9.280241  | -0.083677 | 0.116685  |
| S                                       | 9.242014  | 3.060542  | -0.001247 |
| S                                       | 12.018488 | -4.755310 | 0.073116  |
| S                                       | 11.941550 | -1.613691 | 0.112256  |
| S                                       | 12.058247 | 1.606861  | 0.060058  |
| S                                       | 0.966087  | 1.594619  | 3.191589  |
| S                                       | 0.958659  | 4.793409  | 3.199091  |
| S                                       | 0.965557  | 7.976776  | 3.192449  |
| S                                       | 3.726767  | -0.025999 | 3.151243  |
| S                                       | 3.730450  | 3.161965  | 3.166436  |
| S                                       | 3.726609  | 6.361151  | 3.146134  |
| S                                       | 6.528208  | -1.612466 | 3.076082  |
| S                                       | 6.518359  | 1.488659  | 3.090730  |
| S                                       | 6.478093  | 4.735436  | 3.101141  |
| S                                       | 9.182526  | -3.241986 | 3.009238  |
| S                                       | 11.948528 | -4.726376 | 3.144376  |
| S                                       | 12.037812 | 1.634850  | 3.211818  |
| S                                       | 9.211972  | 3.081978  | 3.149487  |
| C                                       | 10.866142 | -1.164783 | 2.916846  |
| O                                       | 12.170540 | -1.458906 | 2.977999  |
| H                                       | 10.420281 | -1.110942 | 3.925033  |
| H                                       | 9.916975  | 0.227113  | 2.759438  |

|                              |           |           |          |
|------------------------------|-----------|-----------|----------|
| <b>CHO* + H* = CHOH* + *</b> |           |           |          |
| Mo                           | 1.834195  | 0.016827  | 1.635586 |
| Mo                           | 1.822888  | 3.218514  | 1.640287 |
| Mo                           | 1.806083  | 6.414436  | 1.626653 |
| Mo                           | 4.617538  | -1.570878 | 1.624878 |
| Mo                           | 4.597057  | 1.598465  | 1.641104 |
| Mo                           | 4.565760  | 4.794861  | 1.623343 |
| Mo                           | 7.339522  | -3.234500 | 1.534913 |
| Mo                           | 7.436450  | 0.058522  | 1.580571 |
| Mo                           | 7.336374  | 3.188965  | 1.575175 |
| Mo                           | 10.088740 | -4.808565 | 1.480192 |
| Mo                           | 10.131121 | 1.644398  | 1.521774 |
| Mo                           | 12.876534 | -6.321687 | 1.589595 |
| Mo                           | 12.903462 | -3.127214 | 1.528530 |
| Mo                           | 12.877573 | 0.112480  | 1.587237 |
| Cu                           | 9.841220  | -1.933775 | 1.156082 |
| S                            | 0.933010  | 1.622149  | 0.069629 |
| S                            | 0.925491  | 4.800367  | 0.038283 |
| S                            | 0.919705  | 8.009691  | 0.042199 |
| S                            | 3.677230  | 0.014959  | 0.076796 |
| S                            | 3.655822  | 3.187820  | 0.076973 |
| S                            | 3.662726  | 6.412126  | 0.072765 |
| S                            | 6.447752  | -1.557127 | 0.040600 |
| S                            | 6.409589  | 1.593941  | 0.042777 |

|   |           |           |           |
|---|-----------|-----------|-----------|
| S | 6.350682  | 4.752615  | 0.017153  |
| S | 9.019549  | -3.444847 | -0.225114 |
| S | 9.213755  | 0.016136  | 0.026146  |
| S | 9.152048  | 3.156068  | -0.040670 |
| S | 11.986931 | -4.745218 | -0.020159 |
| S | 11.872315 | -1.529123 | 0.172078  |
| S | 12.002437 | 1.659758  | -0.006523 |
| S | 0.889710  | 1.623184  | 3.183150  |
| S | 0.851440  | 4.847249  | 3.171678  |
| S | 0.856512  | 7.988194  | 3.189752  |
| S | 3.683002  | 0.002285  | 3.200878  |
| S | 3.666848  | 3.204751  | 3.199542  |
| S | 3.667803  | 6.409789  | 3.183571  |
| S | 6.539734  | -1.573224 | 3.131040  |
| S | 6.484265  | 1.598485  | 3.172412  |
| S | 6.428138  | 4.787037  | 3.143947  |
| S | 9.169573  | -3.270107 | 3.050669  |
| S | 11.922703 | -4.665858 | 3.087511  |
| S | 11.933011 | 1.651187  | 3.158270  |
| S | 9.208102  | 3.205490  | 3.091399  |
| C | 9.256053  | 0.231993  | 2.969220  |
| O | 10.165503 | -0.761009 | 2.852280  |
| H | 9.043855  | 0.523899  | 4.009610  |
| H | 11.530648 | -0.645756 | 2.810096  |

| COH* + H* = CHOH* + * |           |           |           |
|-----------------------|-----------|-----------|-----------|
| Mo                    | 1.818458  | 0.023458  | 1.608960  |
| Mo                    | 1.815774  | 3.207772  | 1.613622  |
| Mo                    | 1.833406  | 6.395562  | 1.597312  |
| Mo                    | 4.578843  | -1.589396 | 1.601193  |
| Mo                    | 4.573588  | 1.602338  | 1.615850  |
| Mo                    | 4.570733  | 4.771443  | 1.598198  |
| Mo                    | 7.289861  | -3.236068 | 1.518893  |
| Mo                    | 7.293446  | 0.036831  | 1.510570  |
| Mo                    | 7.345125  | 3.128506  | 1.571828  |
| Mo                    | 10.066598 | -4.865610 | 1.535087  |
| Mo                    | 10.138198 | 1.575605  | 1.574676  |
| Mo                    | 12.873285 | -6.342922 | 1.609841  |
| Mo                    | 12.903255 | -3.132827 | 1.537168  |
| Mo                    | 12.888546 | 0.071167  | 1.542763  |
| Cu                    | 10.342659 | -2.117154 | 1.310057  |
| S                     | 0.896742  | 1.621315  | 0.049052  |
| S                     | 0.958004  | 4.800289  | 0.013966  |
| S                     | 0.943341  | 8.000764  | 0.013848  |
| S                     | 3.652619  | 0.009677  | 0.051598  |
| S                     | 3.643045  | 3.184929  | 0.046522  |
| S                     | 3.667233  | 3.687559  | 0.036889  |
| S                     | 3.389622  | -1.621856 | -0.000216 |
| S                     | 3.668505  | 1.569337  | -0.010862 |
| S                     | 3.681837  | 4.713417  | 0.003948  |
| S                     | 9.073672  | -3.433557 | -0.138401 |
| S                     | 9.245261  | -0.212700 | 0.337644  |
| S                     | 9.192482  | 3.075560  | -0.004376 |
| S                     | 11.945769 | -4.784995 | 0.017759  |
| S                     | 12.090246 | -1.572048 | -0.118672 |
| S                     | 11.944676 | 1.659934  | 0.007174  |
| S                     | 0.895403  | 1.620148  | 3.179372  |
| S                     | 0.873316  | 4.821568  | 3.159141  |
| S                     | 0.881495  | 7.989042  | 3.153068  |
| S                     | 3.659440  | 0.002892  | 3.172115  |
| S                     | 3.656380  | 3.197630  | 3.178483  |
| S                     | 3.672029  | 6.382853  | 3.165818  |
| S                     | 6.488195  | -1.577700 | 3.107964  |
| S                     | 6.448923  | 1.562569  | 3.157000  |
| S                     | 6.436462  | 4.755406  | 3.121034  |
| S                     | 9.174282  | -3.126757 | 3.000628  |
| S                     | 11.911577 | -4.703389 | 3.112121  |
| S                     | 11.934410 | 1.611021  | 3.196170  |
| S                     | 9.174892  | 3.113013  | 3.143506  |
| S                     | 0.7202243 | -1.579098 | 2.713774  |
| O                     | 11.815740 | -1.571083 | 4.018002  |
| H                     | 11.791079 | -0.647840 | 4.368058  |
| H                     | 11.219505 | -0.415066 | 2.046404  |

|   |           |           |          |
|---|-----------|-----------|----------|
| S | 0.935956  | 8.013623  | 3.218093 |
| S | 3.702900  | -0.021570 | 3.161423 |
| S | 3.680284  | 3.190261  | 3.173066 |
| S | 3.698900  | 6.381365  | 3.159654 |
| S | 6.529348  | -1.641517 | 3.033132 |
| S | 6.475555  | 1.499213  | 3.121510 |
| S | 6.452715  | 4.739346  | 3.071632 |
| S | 9.160769  | -3.235927 | 2.912842 |
| S | 11.880591 | -4.631402 | 3.126602 |
| S | 12.126054 | 1.791805  | 3.272818 |
| S | 9.217285  | 3.100424  | 3.148825 |
| C | 10.624237 | -0.277048 | 2.968480 |
| O | 12.126055 | -1.432924 | 2.861170 |
| H | 10.856304 | -0.163829 | 4.034879 |
| H | 9.931467  | -1.114831 | 2.832179 |

|                       |           |           |           |
|-----------------------|-----------|-----------|-----------|
| CHOH* + * = CH* + OH* |           |           |           |
| Mo                    | 1.799666  | -0.000593 | 1.623673  |
| Mo                    | 1.837942  | 3.189967  | 1.600148  |
| Mo                    | 1.788696  | 6.395986  | 1.592386  |
| Mo                    | 4.591858  | -1.582238 | 1.612327  |
| Mo                    | 4.592028  | 1.573784  | 1.620003  |
| Mo                    | 4.552427  | 4.776513  | 1.599820  |
| Mo                    | 7.289793  | -3.238377 | 1.549777  |
| Mo                    | 7.430939  | 0.014263  | 1.584728  |
| Mo                    | 7.323578  | 3.171781  | 1.557703  |
| Mo                    | 10.052809 | -4.807181 | 1.459100  |
| Mo                    | 10.137585 | 1.693104  | 1.487527  |
| Mo                    | 12.872406 | -6.316179 | 1.548075  |
| Mo                    | 12.950036 | -3.171338 | 1.404901  |
| Mo                    | 12.789177 | 0.069822  | 1.596150  |
| Cu                    | 9.659819  | -1.810187 | 1.364926  |
| S                     | 0.931041  | 1.598777  | 0.035427  |
| S                     | 0.990013  | 4.764561  | -0.035274 |
| S                     | 0.838692  | 8.007243  | 0.054027  |
| S                     | 3.646412  | -0.004397 | 0.063083  |
| S                     | 3.674403  | 3.159999  | 0.046766  |
| S                     | 3.649318  | 6.404355  | 0.049621  |
| S                     | 6.423547  | -1.585462 | 0.030115  |
| S                     | 6.413665  | 1.559221  | 0.024870  |
| S                     | 6.349633  | 4.748770  | 0.003945  |
| S                     | 9.041655  | -3.376638 | -0.167780 |
| S                     | 9.264035  | -0.004679 | 0.037246  |
| S                     | 9.104535  | 3.182340  | -0.082886 |
| S                     | 11.942308 | -4.776940 | -0.078933 |
| S                     | 11.899415 | -1.595122 | 0.106397  |
| S                     | 11.998992 | 1.642670  | -0.026512 |
| S                     | 0.873702  | 1.623588  | 3.153984  |
| S                     | 0.841665  | 4.813040  | 3.111001  |
| S                     | 0.805655  | 7.956854  | 3.164384  |
| S                     | 3.653838  | -0.008895 | 3.183413  |
| S                     | 3.663971  | 3.180847  | 3.176647  |
| S                     | 3.638430  | 6.390814  | 3.158711  |
| S                     | 6.487697  | -1.593298 | 3.142369  |
| S                     | 6.483542  | 1.566381  | 3.161107  |
| S                     | 6.395633  | 4.756038  | 3.134380  |
| S                     | 9.141177  | -3.254924 | 3.046581  |
| S                     | 11.910062 | -4.624753 | 3.030907  |
| S                     | 11.930552 | 1.706756  | 3.122811  |
| S                     | 9.193109  | 3.200530  | 3.090731  |
| C                     | 9.227892  | 0.243498  | 2.771845  |
| O                     | 10.937591 | -0.869528 | 2.729495  |
| H                     | 9.261668  | 0.225918  | 3.868343  |
| H                     | 11.045978 | -1.193878 | 3.651086  |

|                                                  |           |           |           |
|--------------------------------------------------|-----------|-----------|-----------|
| CH <sub>2</sub> O* + H* = CH <sub>2</sub> O* + * |           |           |           |
| Mo                                               | 1.873499  | 0.003029  | 1.608333  |
| Mo                                               | 1.854041  | 3.199597  | 1.614464  |
| Mo                                               | 1.842965  | 6.389182  | 1.601792  |
| Mo                                               | 4.621702  | -1.626111 | 1.531769  |
| Mo                                               | 4.612421  | 1.569358  | 1.566322  |
| Mo                                               | 4.588358  | 4.743648  | 1.553700  |
| Mo                                               | 7.336003  | -3.293425 | 1.396918  |
| Mo                                               | 7.340056  | -0.021618 | 1.417424  |
| Mo                                               | 7.378818  | 3.087530  | 1.530462  |
| Mo                                               | 10.095849 | -4.879137 | 1.469323  |
| Mo                                               | 10.252031 | 1.550875  | 1.659942  |
| Mo                                               | 12.930033 | -6.319408 | 1.619568  |
| Mo                                               | 12.899706 | -3.137162 | 1.608944  |
| Mo                                               | 12.956970 | 0.086575  | 1.636790  |
| Cu                                               | 9.858176  | -1.999899 | 1.060645  |
| S                                                | 0.943010  | 1.612682  | 0.049841  |
| S                                                | 0.897386  | 4.790924  | 0.054617  |
| S                                                | 0.925298  | 7.996594  | 0.041616  |
| S                                                | 3.673663  | -0.014929 | 0.007643  |
| S                                                | 3.650080  | 3.160051  | 0.013061  |
| S                                                | 3.655440  | 6.353005  | 0.001160  |
| S                                                | 6.412369  | -1.649895 | -0.111559 |
| S                                                | 6.397469  | 1.551567  | -0.066453 |
| S                                                | 6.376979  | 4.637958  | -0.052581 |
| S                                                | 9.039497  | -3.589509 | -0.316039 |
| S                                                | 9.267026  | -0.068082 | 0.127158  |
| S                                                | 9.246045  | 2.998106  | -0.009634 |
| S                                                | 12.014135 | -4.742134 | 0.021638  |
| S                                                | 11.895534 | -1.541695 | 0.167572  |
| S                                                | 12.035904 | 1.629428  | 0.075842  |
| S                                                | 0.966813  | 1.614086  | 3.177700  |
| S                                                | 0.921162  | 4.808036  | 3.173495  |
| S                                                | 0.981454  | 7.995305  | 3.192715  |
| S                                                | 3.741900  | -0.033739 | 3.130057  |
| S                                                | 3.717458  | 3.169099  | 3.147484  |
| S                                                | 3.721496  | 6.367176  | 3.124441  |
| S                                                | 6.546255  | -1.637432 | 3.008030  |
| S                                                | 6.506867  | 1.499158  | 3.086093  |
| S                                                | 6.469985  | 4.740991  | 3.047370  |
| S                                                | 9.175740  | -3.200453 | 2.916985  |
| S                                                | 11.904763 | -4.709567 | 3.112207  |

|   |           |           |          |
|---|-----------|-----------|----------|
| S | 12.063966 | 1.694861  | 3.201546 |
| S | 9.214695  | 3.134911  | 3.119932 |
| C | 11.265160 | -1.072179 | 3.891832 |
| O | 12.122709 | -1.430424 | 3.010454 |
| H | 10.557202 | -1.822043 | 4.265950 |
| H | 11.455919 | -0.161412 | 4.473245 |
| H | 10.116627 | 0.104663  | 2.857943 |

|                                                   |           |           |           |
|---------------------------------------------------|-----------|-----------|-----------|
| CH <sub>2</sub> O* + H* = CH <sub>2</sub> OH* + * |           |           |           |
| Mo                                                | 1.833563  | 0.030008  | 1.585730  |
| Mo                                                | 1.804306  | 3.236875  | 1.596327  |
| Mo                                                | 1.792707  | 6.421130  | 1.575197  |
| Mo                                                | 4.574884  | -1.591817 | 1.577528  |
| Mo                                                | 4.567787  | 1.602138  | 1.607588  |
| Mo                                                | 4.553380  | 4.781113  | 1.590045  |
| Mo                                                | 7.313075  | -3.270249 | 1.508189  |
| Mo                                                | 7.336157  | 0.008994  | 1.620503  |
| Mo                                                | 7.339383  | 3.146633  | 1.579259  |
| Mo                                                | 10.083535 | -4.828753 | 1.454473  |
| Mo                                                | 10.257985 | 1.572633  | 1.521098  |
| Mo                                                | 12.895336 | -6.289686 | 1.548216  |
| Mo                                                | 12.877341 | -3.078419 | 1.499997  |
| Mo                                                | 12.899022 | 0.142626  | 1.542454  |
| Cu                                                | 9.828709  | -1.905148 | 1.202516  |
| S                                                 | 0.935232  | 1.640579  | 0.016348  |
| S                                                 | 0.889381  | 4.818142  | -0.002222 |
| S                                                 | 0.925272  | 8.025156  | -0.013371 |
| S                                                 | 3.670511  | 0.019866  | 0.025590  |
| S                                                 | 3.640983  | 3.192904  | 0.036015  |
| S                                                 | 3.649326  | 6.387923  | 0.021576  |
| S                                                 | 6.420158  | -1.592506 | 0.018682  |
| S                                                 | 6.400635  | 1.572567  | 0.046052  |
| S                                                 | 6.357486  | 4.701144  | 0.002137  |
| S                                                 | 8.996322  | -3.477339 | -0.241429 |
| S                                                 | 9.124556  | -0.007943 | 0.044822  |
| S                                                 | 9.182732  | 3.075749  | -0.031537 |
| S                                                 | 11.963798 | -4.709998 | -0.053369 |
| S                                                 | 11.820866 | -1.469503 | 0.180027  |
| S                                                 | 12.012502 | 1.693155  | -0.049357 |
| S                                                 | 0.899828  | 1.642288  | 3.139313  |
| S                                                 | 0.831727  | 4.870755  | 3.129916  |
| S                                                 | 0.868505  | 8.004040  | 3.144677  |
| S                                                 | 3.658541  | -0.001770 | 3.159294  |
| S                                                 | 3.636207  | 3.210299  | 3.164108  |
| S                                                 | 3.636269  | 6.394545  | 3.141370  |
| S                                                 | 6.427227  | -1.649715 | 3.108402  |
| S                                                 | 6.415731  | 1.593876  | 3.167166  |
| S                                                 | 6.412180  | 4.757682  | 3.124821  |
| S                                                 | 9.186370  | -3.236717 | 2.973056  |
| S                                                 | 11.922687 | -4.645038 | 3.047434  |
| S                                                 | 12.020824 | 1.709087  | 3.143409  |
| S                                                 | 9.249837  | 3.141897  | 3.060777  |
| C                                                 | 8.868874  | -0.102858 | 3.396989  |
| O                                                 | 10.108195 | -0.248541 | 2.686782  |
| H                                                 | 8.878528  | 0.786715  | 4.041544  |
| H                                                 | 8.669572  | -0.997172 | 3.997692  |
| H                                                 | 11.514559 | -0.570266 | 2.859426  |

|                                     |           |           |           |
|-------------------------------------|-----------|-----------|-----------|
| CHOH* + H* = CH <sub>2</sub> O* + * |           |           |           |
| Mo                                  | 1.915549  | 0.003995  | 1.599985  |
| Mo                                  | 1.897752  | 3.200094  | 1.608590  |
| Mo                                  | 1.864200  | 6.389061  | 1.631644  |
| Mo                                  | 4.659993  | -1.623334 | 1.549348  |
| Mo                                  | 4.656113  | 1.564833  | 1.571683  |
| Mo                                  | 4.624834  | 4.746621  | 1.569097  |
| Mo                                  | 7.372403  | -3.286656 | 1.425223  |
| Mo                                  | 7.394588  | -0.028394 | 1.427749  |
| Mo                                  | 7.409102  | 3.097097  | 1.538019  |
| Mo                                  | 10.128880 | -4.877943 | 1.463148  |
| Mo                                  | 10.289098 | 1.557176  | 1.613086  |
| Mo                                  | 12.972477 | -6.297678 | 1.570337  |
| Mo                                  | 12.932614 | -3.172440 | 1.626055  |
| Mo                                  | 12.952799 | 0.193250  | 1.690680  |
| Cu                                  | 9.834148  | -1.952171 | 1.065629  |
| S                                   | 1.008362  | 1.613420  | 0.024732  |
| S                                   | 0.933546  | 4.801052  | 0.065164  |
| S                                   | 0.960475  | 7.981898  | 0.057650  |
| S                                   | 3.722979  | -0.021132 | 0.011813  |
| S                                   | 3.701337  | 3.162637  | 0.017463  |
| S                                   | 3.676673  | 6.356007  | 0.028846  |
| S                                   | 6.447918  | -1.649439 | -0.091046 |
| S                                   | 6.442836  | 1.547282  | -0.056292 |
| S                                   | 6.409158  | 4.654833  | -0.038824 |
| S                                   | 9.072979  | -3.564588 | -0.296601 |
| S                                   | 9.293216  | -0.042095 | 0.075500  |
| S                                   | 9.259483  | 3.014716  | -0.014418 |
| S                                   | 12.036509 | -4.720255 | -0.006788 |
| S                                   | 11.941379 | -1.516423 | 0.263294  |
| S                                   | 12.059741 | 1.659853  | 0.034380  |
| S                                   | 1.001350  | 1.616125  | 3.154050  |
| S                                   | 0.961017  | 4.791986  | 3.184958  |
| S                                   | 0.998891  | 8.016818  | 3.207559  |
| S                                   | 3.773629  | -0.029967 | 3.137131  |
| S                                   | 3.753684  | 3.162917  | 3.150895  |
| S                                   | 3.755657  | 6.369260  | 3.141384  |
| S                                   | 6.584178  | -1.628170 | 3.031397  |
| S                                   | 6.550706  | 1.498402  | 3.089012  |
| S                                   | 6.501355  | 4.741893  | 3.066709  |
| S                                   | 9.224013  | -3.190202 | 2.938097  |
| S                                   | 11.948433 | -4.767130 | 3.097182  |
| S                                   | 12.068834 | 1.840566  | 3.210032  |
| S                                   | 9.246245  | 3.124140  | 3.108351  |
| C                                   | 11.737779 | -0.033546 | 3.196877  |
| O                                   | 11.825985 | -1.995387 | 3.257356  |
| H                                   | 11.443973 | -0.251168 | 4.185323  |
| H                                   | 10.187459 | 0.095448  | 2.779974  |
| H                                   | 11.165999 | -2.450460 | 3.845560  |

| CH <sub>2</sub> O* + * = CH <sub>2</sub> * + O* |           |           |           |
|-------------------------------------------------|-----------|-----------|-----------|
| Mo                                              | 1.811025  | 0.047239  | 1.513043  |
| Mo                                              | 1.800259  | 3.212197  | 1.521807  |
| Mo                                              | 1.828915  | 6.414357  | 1.503178  |
| Mo                                              | 4.575009  | -1.567836 | 1.453303  |
| Mo                                              | 4.577069  | 1.620792  | 1.473572  |
| Mo                                              | 4.557106  | 4.801908  | 1.462650  |
| Mo                                              | 7.303853  | -3.183211 | 1.340857  |
| Mo                                              | 7.307741  | 0.061344  | 1.325918  |
| Mo                                              | 7.341958  | 3.176384  | 1.407621  |
| Mo                                              | 10.051357 | -4.766856 | 1.427950  |
| Mo                                              | 10.084199 | 1.625156  | 1.400891  |
| Mo                                              | 12.849893 | -6.333770 | 1.523170  |
| Mo                                              | 12.880369 | -3.032508 | 1.508720  |
| Mo                                              | 12.869899 | -0.004448 | 1.485840  |
| Cu                                              | 10.008451 | -1.847138 | 1.078450  |
| S                                               | 0.869403  | 1.634920  | -0.040597 |
| S                                               | 0.894465  | 4.809223  | -0.042997 |
| S                                               | 0.901890  | 8.022974  | -0.051649 |
| S                                               | 3.624202  | 0.033420  | -0.076181 |
| S                                               | 3.610317  | 3.205673  | -0.072373 |
| S                                               | 3.632739  | 6.405613  | -0.094013 |
| S                                               | 6.364508  | -1.577920 | -0.180098 |
| S                                               | 6.356945  | 1.614866  | -0.171174 |
| S                                               | 6.349086  | 4.753470  | -0.147946 |
| S                                               | 9.043360  | -3.398839 | -0.322705 |
| S                                               | 9.219623  | -0.053175 | -0.000637 |
| S                                               | 9.213476  | 3.172485  | -0.152160 |
| S                                               | 11.970353 | -4.708450 | -0.038247 |
| S                                               | 11.978676 | -1.555909 | -0.138186 |
| S                                               | 11.987168 | 1.625968  | -0.068447 |
| S                                               | 0.871999  | 1.626156  | 3.091703  |
| S                                               | 0.900933  | 4.839620  | 3.082283  |
| S                                               | 0.892031  | 8.006959  | 3.065677  |
| S                                               | 3.680066  | 0.022630  | 3.042882  |
| S                                               | 3.672867  | 3.212738  | 3.051830  |
| S                                               | 3.687378  | 6.411445  | 3.041847  |
| S                                               | 6.502188  | -1.535260 | 2.938594  |
| S                                               | 6.483860  | 1.588454  | 2.985189  |
| S                                               | 6.444248  | 4.808267  | 2.956638  |
| S                                               | 9.183152  | -3.703639 | 2.867226  |
| S                                               | 11.892504 | -4.664663 | 3.034032  |
| S                                               | 11.851198 | 1.565490  | 3.039354  |
| S                                               | 9.155084  | 3.166573  | 2.986105  |
| C                                               | 11.310796 | -1.255988 | 4.947212  |
| O                                               | 12.193359 | -1.525880 | 2.629512  |
| H                                               | 10.507379 | -0.561083 | 4.714437  |
| H                                               | 11.092806 | -2.316818 | 5.032872  |
| H                                               | 12.287446 | -0.875059 | 5.233675  |

|    |           |           |           |
|----|-----------|-----------|-----------|
| Mo | 4.592110  | 1.592249  | 1.619331  |
| Mo | 4.579693  | 4.786363  | 1.599601  |
| Mo | 7.375817  | -3.251413 | 1.478687  |
| Mo | 7.410443  | 0.064800  | 1.578023  |
| Mo | 7.350304  | 1.376018  | 1.565584  |
| Mo | 10.118958 | -4.840611 | 1.420775  |
| Mo | 10.181461 | 1.583003  | 1.614785  |
| Mo | 12.895882 | -6.341277 | 1.581600  |
| Mo | 12.903019 | -3.146125 | 1.445674  |
| Mo | 12.873393 | 0.044161  | 1.590485  |
| Cu | 9.934396  | -1.987626 | 1.062469  |
| S  | 0.938514  | 1.598495  | 0.051024  |
| S  | 0.960548  | 4.781282  | -0.019365 |
| S  | 0.881962  | 8.011024  | 0.040228  |
| S  | 3.671487  | 0.001391  | 0.056798  |
| S  | 3.669474  | 3.180488  | 0.049445  |
| S  | 3.675749  | 6.397957  | 0.038607  |
| S  | 3.662556  | -1.574901 | 0.007298  |
| S  | 6.407105  | 1.598378  | 0.032485  |
| S  | 6.367199  | 4.726144  | -0.003908 |
| S  | 9.004908  | -3.545807 | -0.317267 |
| S  | 9.217097  | -0.045595 | 0.080527  |
| S  | 9.186852  | 3.057816  | -0.029729 |
| S  | 11.998406 | -4.803132 | -0.067181 |
| S  | 11.904071 | -1.566887 | 0.090064  |
| S  | 12.003715 | 1.610504  | 0.026562  |
| S  | 9.105053  | 1.625190  | 3.167357  |
| S  | 0.842139  | 4.842283  | 3.129826  |
| S  | 0.863213  | 7.944711  | 3.175292  |
| S  | 3.698087  | -0.016205 | 3.177765  |
| S  | 3.668975  | 3.204010  | 3.176033  |
| S  | 3.668765  | 6.400260  | 3.150744  |
| S  | 6.549067  | -1.601947 | 3.095461  |
| S  | 6.459052  | 1.610350  | 3.162137  |
| S  | 6.458518  | 4.800508  | 3.110353  |
| S  | 9.285255  | -3.156396 | 2.908066  |
| S  | 11.945048 | -4.652949 | 3.041906  |
| S  | 12.015791 | 1.645852  | 3.201268  |
| S  | 9.238404  | 3.228624  | 3.089752  |
| C  | 0.987541  | 0.230760  | 3.026605  |
| H  | 8.948253  | 0.783477  | 3.965702  |
| H  | 9.362232  | -0.794761 | 3.301750  |
| H  | 10.613511 | -0.016942 | 2.247539  |

---

|                                                  |          |           |          |
|--------------------------------------------------|----------|-----------|----------|
| $\text{CH}_3^+ + \text{H}^* = \text{CH}_2 + 2^*$ |          |           |          |
| Mo                                               | 1.940180 | -0.108835 | 1.581992 |
| Mo                                               | 1.936826 | 3.098757  | 1.587039 |

## 7. Transition state of elementary reaction on Mo edge

|                                                                    |           |           |           |
|--------------------------------------------------------------------|-----------|-----------|-----------|
| O                                                                  | 9.511583  | 9.470359  | 10.902850 |
| O                                                                  | 3.313568  | 9.527487  | 10.919119 |
| H                                                                  | 3.203647  | 10.417692 | 11.188647 |
| H                                                                  | 4.628738  | 9.270549  | 11.348661 |
| <hr/>                                                              |           |           |           |
| OH <sup>+</sup> + H <sup>+</sup> = O <sup>+</sup> + H <sup>+</sup> |           |           |           |
| <hr/>                                                              |           |           |           |
| Mo                                                                 | 3.215622  | 9.319500  | 0.937554  |
| Mo                                                                 | 9.596269  | 9.319500  | 0.957992  |
| Mo                                                                 | -0.059281 | 9.319500  | 0.952070  |
| Mo                                                                 | 6.333283  | 9.319500  | 0.943964  |
| Mo                                                                 | 11.150630 | 9.319500  | 3.720434  |
| Mo                                                                 | 7.962665  | 9.319500  | 3.704198  |
| Mo                                                                 | 1.582748  | 9.319500  | 3.676389  |
| Mo                                                                 | 4.785364  | 9.319500  | 3.679281  |
| Mo                                                                 | 9.553709  | 9.319500  | 4.673805  |
| Mo                                                                 | 0.001522  | 9.319500  | 4.658940  |
| Mo                                                                 | 6.363731  | 9.319500  | 4.661339  |
| Mo                                                                 | 3.191962  | 9.319499  | 6.392166  |
| Mo                                                                 | 4.865776  | 9.319499  | 9.198742  |
| Mo                                                                 | 1.567624  | 9.319499  | 9.234484  |
| Mo                                                                 | 11.360374 | 9.319499  | 9.275206  |
| Mo                                                                 | 7.798101  | 9.319500  | 9.257087  |
| S                                                                  | 1.573436  | 7.957474  | -0.164183 |
| S                                                                  | 4.776052  | 7.768351  | 0.033364  |
| S                                                                  | 11.144590 | 7.759699  | 0.054071  |
| S                                                                  | 1.573436  | 10.861525 | -0.164183 |
| S                                                                  | 7.968753  | 7.954426  | -0.158398 |
| S                                                                  | 7.968753  | 10.684573 | -0.158398 |
| S                                                                  | 4.776052  | 10.876048 | 0.033364  |
| S                                                                  | 11.144590 | 10.879300 | 0.054071  |
| S                                                                  | 3.180928  | 10.885330 | 2.760123  |
| S                                                                  | -0.017988 | 7.752400  | 2.779382  |
| S                                                                  | 6.380475  | 10.888512 | 2.768787  |
| S                                                                  | 9.556937  | 7.752527  | 2.790729  |
| S                                                                  | 6.380475  | 7.750487  | 2.768787  |
| S                                                                  | 3.180928  | 7.753669  | 2.760123  |
| S                                                                  | 9.556937  | 10.883772 | 2.790729  |
| S                                                                  | -0.017988 | 10.886599 | 2.779382  |
| S                                                                  | 1.586176  | 7.757897  | 5.507441  |
| S                                                                  | 7.964679  | 10.880811 | 5.550952  |
| S                                                                  | 4.790221  | 7.753349  | 5.506523  |
| S                                                                  | 1.586176  | 10.881103 | 5.507442  |
| S                                                                  | 11.144633 | 7.757323  | 5.562353  |
| S                                                                  | 7.964679  | 7.758188  | 5.550952  |
| S                                                                  | 4.790221  | 10.885651 | 5.506523  |
| S                                                                  | 11.144633 | 10.881676 | 5.562353  |
| S                                                                  | 3.204217  | 7.776415  | 8.243933  |
| S                                                                  | 0.044412  | 10.923040 | 8.284438  |
| S                                                                  | 6.355550  | 7.697462  | 8.289307  |
| S                                                                  | 0.044412  | 7.715959  | 8.284437  |
| S                                                                  | 6.355550  | 10.941537 | 8.289308  |
| S                                                                  | 9.565818  | 8.313430  | 8.387912  |

|                                                  |           |           |           |
|--------------------------------------------------|-----------|-----------|-----------|
| S                                                | 9.565818  | 10.807569 | 8.387911  |
| S                                                | 3.204217  | 10.862584 | 8.243934  |
| S                                                | 6.063450  | 9.319499  | 11.329994 |
| S                                                | 0.088604  | 9.319499  | 11.105530 |
| S                                                | 9.480517  | 9.319499  | 10.917237 |
| O                                                | 3.195589  | 9.319500  | 10.427337 |
| H                                                | 4.715529  | 9.319500  | 11.622250 |
| <hr/>                                            |           |           |           |
| $\text{CO}^+ + \text{O}^+ = \text{CO}_2^{+} + *$ |           |           |           |
| S                                                | 3.254828  | 9.218770  | 9.070642  |
| Mo                                               | 9.640043  | 9.430913  | 9.068047  |
| Mo                                               | -0.017300 | 9.218111  | 9.073678  |
| Mo                                               | 6.358018  | 9.435088  | 9.054971  |
| Mo                                               | 11.185930 | 9.339407  | 7.332796  |
| Mo                                               | 7.998794  | 9.339414  | 7.309366  |
| Mo                                               | 1.615842  | 9.347651  | 7.340862  |
| Mo                                               | 4.813201  | 9.345827  | 7.322794  |
| Mo                                               | 9.585032  | 9.352606  | 6.483695  |
| Mo                                               | 0.020409  | 9.386495  | 6.502436  |
| Mo                                               | 6.411154  | 9.363280  | 6.473793  |
| Mo                                               | 3.229775  | 9.373277  | 6.469650  |
| Mo                                               | 4.985479  | 9.401920  | 9.277253  |
| Mo                                               | 1.606371  | 9.428485  | 9.309218  |
| Mo                                               | 11.013310 | 9.442132  | 9.279586  |
| Mo                                               | 8.025711  | 9.392759  | 9.269533  |
| S                                                | 1.618210  | 7.822243  | -0.048527 |
| S                                                | 4.798384  | 7.763961  | 0.064535  |
| S                                                | 11.194877 | 7.758322  | 0.072919  |
| S                                                | 1.616208  | 10.479969 | -0.254547 |
| S                                                | 7.998687  | 8.158899  | -0.253510 |
| S                                                | 8.002274  | 10.851590 | -0.084600 |
| S                                                | 4.805580  | 10.880132 | 0.046746  |
| S                                                | 11.188605 | 10.878588 | 0.050841  |
| S                                                | 3.207519  | 10.872684 | 2.741931  |
| S                                                | 0.032365  | 7.749227  | 2.865469  |
| S                                                | 6.410330  | 10.926795 | 2.822307  |
| S                                                | 9.592395  | 7.797906  | 2.750709  |
| S                                                | 6.404280  | 7.801892  | 2.741908  |
| S                                                | 3.205248  | 7.753804  | 2.863671  |
| S                                                | 9.591970  | 10.922752 | 2.829695  |
| S                                                | 0.026636  | 10.871316 | 2.746345  |
| S                                                | 1.615487  | 7.806092  | 5.605183  |
| S                                                | 8.001205  | 10.908336 | 5.534583  |
| S                                                | 4.816967  | 7.794910  | 5.564539  |
| S                                                | 1.620108  | 10.933948 | 5.559187  |
| S                                                | 11.193855 | 7.797306  | 5.589483  |
| S                                                | 7.996843  | 7.786050  | 5.550177  |
| S                                                | 4.820059  | 10.926160 | 5.539267  |
| S                                                | 11.178007 | 10.917597 | 5.550631  |
| S                                                | 3.283641  | 7.828955  | 8.318112  |
| S                                                | -0.023363 | 10.961945 | 8.332615  |
| S                                                | 6.447375  | 7.890971  | 8.339718  |

|                                       |           |           |           |
|---------------------------------------|-----------|-----------|-----------|
| S                                     | -0.016218 | 7.872205  | 8.401282  |
| S                                     | 6.437708  | 10.988016 | 8.296377  |
| S                                     | 9.559140  | 7.770441  | 8.355292  |
| S                                     | 9.547123  | 10.995995 | 8.292431  |
| S                                     | 3.206962  | 10.925088 | 8.307744  |
| S                                     | 6.362763  | 9.449296  | 11.108824 |
| S                                     | -0.102823 | 9.867109  | 11.000517 |
| S                                     | 9.518816  | 9.354235  | 11.113164 |
| C                                     | 2.152643  | 8.217234  | 10.895904 |
| O                                     | 2.295680  | 7.495254  | 11.799667 |
| O                                     | 3.329272  | 9.497522  | 10.559898 |
| <hr/>                                 |           |           |           |
| <b>CO* + OH* = COOH* + *</b>          |           |           |           |
| <hr/>                                 |           |           |           |
| Mo                                    | 3.227309  | 9.242710  | 0.960617  |
| Mo                                    | 9.565567  | 9.400752  | 0.968480  |
| Mo                                    | -0.015093 | 9.287641  | 0.971796  |
| Mo                                    | 6.318467  | 9.438797  | 0.968114  |
| Mo                                    | 11.155509 | 9.327218  | 3.681014  |
| Mo                                    | 7.965452  | 9.330179  | 3.681811  |
| Mo                                    | 1.585470  | 9.326268  | 3.689057  |
| Mo                                    | 4.770003  | 9.329567  | 3.710801  |
| Mo                                    | 9.561207  | 9.306886  | 6.429922  |
| Mo                                    | 0.004558  | 9.309118  | 6.424471  |
| Mo                                    | 6.363354  | 9.312948  | 6.439430  |
| Mo                                    | 3.165747  | 9.309550  | 6.462568  |
| Mo                                    | 5.021074  | 9.296310  | 9.186778  |
| Mo                                    | 1.403585  | 9.271334  | 9.272506  |
| Mo                                    | 11.328089 | 9.291971  | 9.206131  |
| Mo                                    | 7.808443  | 9.281868  | 9.201626  |
| S                                     | 1.586559  | 7.853316  | -0.093590 |
| S                                     | 4.756294  | 7.792247  | 0.031346  |
| S                                     | 11.146625 | 7.883377  | -0.041597 |
| S                                     | 1.605331  | 10.584034 | -0.205516 |
| S                                     | 7.941276  | 8.114493  | -0.215719 |
| S                                     | 7.957573  | 10.840691 | -0.077806 |
| S                                     | 4.792091  | 10.891614 | 0.041296  |
| S                                     | 11.160868 | 10.819620 | -0.021796 |
| S                                     | 3.183668  | 10.878307 | 2.740740  |
| S                                     | -0.004833 | 7.738831  | 2.794773  |
| S                                     | 6.366982  | 10.923920 | 2.843956  |
| S                                     | 9.555860  | 7.771399  | 2.732933  |
| S                                     | 6.360238  | 7.786467  | 2.732292  |
| S                                     | 3.179117  | 7.743382  | 2.821613  |
| S                                     | 9.559168  | 10.924980 | 2.808993  |
| S                                     | -0.003241 | 10.896534 | 2.756981  |
| S                                     | 1.597790  | 7.750453  | 5.521679  |
| S                                     | 7.968308  | 10.874694 | 5.535484  |
| S                                     | 4.753323  | 7.755516  | 5.534055  |
| S                                     | 1.598071  | 10.881603 | 5.534396  |
| S                                     | 11.151016 | 7.752147  | 5.509694  |
| S                                     | 7.964064  | 7.757648  | 5.505642  |
| S                                     | 4.744834  | 10.880498 | 5.556847  |
| S                                     | 11.155024 | 10.877321 | 5.533781  |
| S                                     | 3.228269  | 7.809468  | 8.392298  |
| S                                     | 0.022740  | 10.922861 | 8.259410  |
| S                                     | 6.390823  | 7.647302  | 8.208005  |
| S                                     | 0.009831  | 7.660629  | 8.238114  |
| S                                     | 6.397883  | 10.951798 | 8.240296  |
| S                                     | 9.563753  | 7.783302  | 8.316701  |
| S                                     | 9.566260  | 10.797410 | 8.341241  |
| S                                     | 3.198068  | 10.771813 | 8.424635  |
| S                                     | 6.320638  | 9.187761  | 11.073342 |
| S                                     | -0.073307 | 9.458882  | 11.099565 |
| S                                     | 9.537356  | 9.257515  | 10.858745 |
| C                                     | 2.634375  | 9.074853  | 11.089314 |
| O                                     | 3.274330  | 10.218731 | 11.513946 |
| O                                     | 2.741540  | 8.014275  | 11.678485 |
| H                                     | 3.726110  | 10.006537 | 12.367220 |
| <hr/>                                 |           |           |           |
| <b>CO* + H<sup>+</sup> = CHO* + #</b> |           |           |           |
| <hr/>                                 |           |           |           |
| Mo                                    | 3.211735  | 9.206371  | 0.995299  |
| Mo                                    | 9.589681  | 9.394672  | 0.986440  |
| Mo                                    | -0.039797 | 9.216086  | 0.999610  |
| Mo                                    | 6.324040  | 9.399143  | 0.990299  |
| Mo                                    | 11.160295 | 9.327962  | 3.727233  |
| Mo                                    | 7.964033  | 9.323111  | 3.710585  |
| Mo                                    | 1.587567  | 9.329924  | 3.737421  |
| Mo                                    | 4.763006  | 9.321140  | 3.738194  |
| Mo                                    | 9.559030  | 9.351910  | 6.458253  |
| Mo                                    | -0.007258 | 9.368801  | 6.495286  |
| Mo                                    | 6.368474  | 9.344238  | 6.449579  |
| Mo                                    | 3.180309  | 9.366606  | 6.523628  |
| Mo                                    | 4.989608  | 9.377249  | 9.223721  |
| Mo                                    | 1.289891  | 9.401021  | 9.321104  |
| Mo                                    | 11.269636 | 9.411086  | 9.239883  |
| Mo                                    | 7.819437  | 9.423519  | 9.225668  |
| S                                     | 1.580638  | 7.776958  | -0.031783 |
| S                                     | 4.760500  | 7.762255  | 0.064883  |
| S                                     | 11.159621 | 7.774038  | 0.058348  |
| S                                     | 1.586459  | 10.494401 | -0.209484 |
| S                                     | 7.956640  | 8.106024  | -0.204802 |
| S                                     | 7.956282  | 10.817693 | -0.053975 |
| S                                     | 4.773150  | 10.836715 | 0.050815  |
| S                                     | 11.151914 | 10.827250 | 0.040305  |
| S                                     | 3.177890  | 10.862748 | 2.754563  |
| S                                     | 0.000351  | 7.727054  | 2.875335  |
| S                                     | 6.362713  | 10.906376 | 2.846130  |
| S                                     | 9.565119  | 7.771427  | 2.769171  |
| S                                     | 6.359714  | 7.770230  | 2.774029  |
| S                                     | 3.167976  | 7.724607  | 2.874636  |
| S                                     | 9.557940  | 10.909501 | 2.834075  |
| S                                     | -0.002634 | 10.870296 | 2.759220  |
| S                                     | 1.600404  | 7.801368  | 5.611400  |
| S                                     | 7.969189  | 10.899822 | 5.529030  |
| S                                     | 4.752294  | 7.778745  | 5.597102  |
| S                                     | 1.606128  | 10.911845 | 5.566270  |
| S                                     | 11.159570 | 7.785970  | 5.580673  |

|                                       |           |           |           |
|---------------------------------------|-----------|-----------|-----------|
| S                                     | 7.975179  | 7.775442  | 5.551623  |
| S                                     | 4.756745  | 10.907199 | 5.554192  |
| S                                     | 11.155297 | 10.910684 | 5.543297  |
| S                                     | 3.105382  | 7.878952  | 8.440576  |
| S                                     | -0.028971 | 11.041811 | 8.272692  |
| S                                     | 6.434980  | 7.731471  | 8.298830  |
| S                                     | -0.050369 | 7.746648  | 8.317042  |
| S                                     | 6.364628  | 11.032756 | 8.191373  |
| S                                     | 9.561754  | 7.869617  | 8.379796  |
| S                                     | 9.548650  | 10.915731 | 8.313907  |
| S                                     | 3.131694  | 10.864605 | 8.476516  |
| S                                     | 6.485223  | 9.907952  | 11.055692 |
| S                                     | -0.111855 | 9.468276  | 11.145652 |
| S                                     | 9.555979  | 9.382198  | 10.911464 |
| C                                     | 3.708981  | 9.186455  | 10.719618 |
| O                                     | 2.695664  | 9.325030  | 11.377901 |
| H                                     | 4.378266  | 8.172239  | 10.769424 |
| <hr/>                                 |           |           |           |
| <b>CO* + H<sup>+</sup> = COH* + #</b> |           |           |           |
| <hr/>                                 |           |           |           |
| Mo                                    | 3.201604  | 9.264704  | 0.987457  |
| Mo                                    | 9.586528  | 9.413283  | 0.989666  |
| Mo                                    | -0.054580 | 9.256669  | 0.992905  |
| Mo                                    | 6.330627  | 9.406944  | 0.992209  |
| Mo                                    | 11.143239 | 9.312594  | 3.735318  |
| Mo                                    | 7.957727  | 9.304527  | 3.720248  |
| Mo                                    | 1.580612  | 9.323161  | 3.718690  |
| Mo                                    | 4.766302  | 9.314405  | 3.721784  |
| Mo                                    | 9.546702  | 9.275454  | 6.483600  |
| Mo                                    | -0.014461 | 9.288806  | 6.472334  |
| Mo                                    | 6.371412  | 9.254935  | 6.457371  |
| Mo                                    | 3.171432  | 9.303017  | 6.482239  |
| Mo                                    | 4.916104  | 9.212116  | 9.147898  |
| Mo                                    | 1.412721  | 9.286085  | 9.245617  |
| Mo                                    | 11.355216 | 9.259286  | 9.275802  |
| Mo                                    | 7.783281  | 9.229228  | 9.277849  |
| S                                     | 1.574647  | 7.859155  | -0.076940 |
| S                                     | 4.756516  | 7.817707  | 0.035346  |
| S                                     | 11.158577 | 7.805252  | 0.046407  |
| S                                     | 1.571176  | 10.582684 | -0.174646 |
| S                                     | 7.957919  | 8.107113  | -0.195326 |
| S                                     | 7.955109  | 10.826963 | -0.055507 |
| S                                     | 4.777424  | 10.867319 | 0.055885  |
| S                                     | 11.131626 | 10.877790 | 0.068316  |
| S                                     | 3.176701  | 10.880295 | 2.777246  |
| S                                     | -0.010825 | 7.737475  | 2.841703  |
| S                                     | 6.368743  | 10.905705 | 2.858108  |
| S                                     | 9.557509  | 7.766424  | 2.754102  |
| S                                     | 6.357649  | 7.762981  | 2.757103  |
| S                                     | 3.166431  | 7.738068  | 2.826840  |
| S                                     | 9.545540  | 10.902440 | 2.862610  |
| S                                     | -0.024092 | 7.607697  | 2.784552  |
| S                                     | 1.591482  | 7.751263  | 5.545566  |
| S                                     | 7.959720  | 10.846435 | 5.580872  |
| S                                     | 4.748128  | 7.736445  | 5.541352  |
| S                                     | 1.583269  | 10.867181 | 5.571801  |
| S                                     | 11.138730 | 7.727850  | 5.556623  |
| S                                     | 7.977567  | 7.712052  | 5.530733  |
| S                                     | 4.773531  | 10.853188 | 5.578019  |
| S                                     | 11.131585 | 10.857933 | 5.590427  |
| S                                     | 3.150878  | 7.731325  | 8.335978  |
| S                                     | -0.010963 | 10.910504 | 8.289908  |
| S                                     | 6.417100  | 7.577967  | 8.250286  |
| S                                     | -0.019111 | 7.628878  | 8.265943  |
| S                                     | 6.364675  | 10.867074 | 8.286259  |
| S                                     | 9.568363  | 7.775242  | 8.391478  |
| S                                     | 9.539740  | 10.741728 | 8.422110  |
| S                                     | 3.181187  | 10.847760 | 8.436212  |
| S                                     | 6.020283  | 9.141977  | 11.195242 |
| S                                     | 0.074006  | 9.220637  | 11.146632 |
| S                                     | 9.497057  | 9.234245  | 10.926766 |
| C                                     | 3.203032  | 9.633079  | 10.566481 |
| O                                     | 3.427895  | 10.086494 | 11.692352 |
| H                                     | 4.807723  | 9.885822  | 11.821208 |
| <hr/>                                 |           |           |           |
| <b>CHO* + O* = HCOO* + #</b>          |           |           |           |
| <hr/>                                 |           |           |           |
| Mo                                    | 3.197164  | 9.423368  | 0.994838  |
| Mo                                    | 9.586056  | 9.277262  | 0.986452  |
| Mo                                    | -0.060142 | 9.422876  | 1.001956  |
| Mo                                    | 6.315708  | 9.286630  | 0.989912  |
| Mo                                    | 11.145861 | 9.310746  | 3.745639  |
| Mo                                    | 7.953781  | 9.332048  | 3.715262  |
| Mo                                    | 1.572039  | 9.301715  | 3.741090  |
| Mo                                    | 4.754473  | 9.322890  | 3.735418  |
| Mo                                    | 9.543082  | 9.280991  | 6.479442  |
| Mo                                    | -0.016455 | 9.252136  | 6.514604  |
| Mo                                    | 6.364948  | 9.306639  | 6.457099  |
| Mo                                    | 3.164186  | 9.269790  | 6.508268  |
| Mo                                    | 4.979932  | 9.303261  | 9.129660  |
| Mo                                    | 1.331021  | 9.190626  | 9.357044  |
| Mo                                    | 11.286551 | 9.177291  | 9.283126  |
| Mo                                    | 7.801531  | 9.208450  | 9.233673  |
| S                                     | 1.568020  | 8.120335  | -0.193018 |
| S                                     | 4.768251  | 7.832436  | 0.035464  |
| S                                     | 11.127186 | 7.822376  | 0.041125  |
| S                                     | 1.567000  | 10.826835 | -0.063859 |
| S                                     | 7.945558  | 9.137353  | -0.114346 |
| S                                     | 7.951150  | 10.619529 | -0.158886 |
| S                                     | 4.740850  | 10.904410 | 0.081971  |
| S                                     | 11.160808 | 10.906317 | 0.090363  |
| S                                     | 3.149245  | 10.908308 | 2.871675  |
| S                                     | -0.022916 | 7.767038  | 2.766090  |
| S                                     | 6.347682  | 10.891302 | 2.794276  |
| S                                     | 9.542209  | 7.750602  | 2.825625  |
| S                                     | 6.357784  | 7.755334  | 2.826006  |
| S                                     | 3.169704  | 7.773409  | 2.758913  |
| S                                     | 9.562875  | 10.882048 | 2.790173  |
| S                                     | -0.013250 | 10.903702 | 2.885164  |

|                                                |           |           |           |
|------------------------------------------------|-----------|-----------|-----------|
| S                                              | 1.591911  | 7.716594  | 5.562570  |
| S                                              | 7.976185  | 10.872712 | 5.563740  |
| S                                              | 4.754937  | 7.736831  | 5.548588  |
| S                                              | 1.574818  | 10.831308 | 5.613804  |
| S                                              | 11.133314 | 7.719704  | 5.559886  |
| S                                              | 7.951699  | 7.745262  | 5.525099  |
| S                                              | 4.735190  | 10.862974 | 5.591514  |
| S                                              | 11.150938 | 10.843352 | 5.612260  |
| S                                              | 3.145195  | 7.763438  | 8.456227  |
| S                                              | -0.049303 | 10.838150 | 8.367868  |
| S                                              | 6.373431  | 7.600388  | 8.178723  |
| S                                              | -0.014267 | 7.576141  | 8.282622  |
| S                                              | 6.454458  | 10.925165 | 8.291115  |
| S                                              | 9.532069  | 7.708871  | 8.330757  |
| S                                              | 9.566909  | 10.725470 | 8.424595  |
| S                                              | 3.086179  | 10.759607 | 8.409763  |
| S                                              | 6.111809  | 8.455349  | 11.065318 |
| S                                              | -0.118441 | 9.066171  | 11.185041 |
| S                                              | 9.429970  | 9.198986  | 10.941073 |
| C                                              | 3.655977  | 9.907887  | 10.827039 |
| O                                              | 2.770664  | 9.074755  | 11.181646 |
| O                                              | 5.279905  | 9.954937  | 11.246674 |
| H                                              | 3.539115  | 10.990833 | 11.012197 |
| <hr/>                                          |           |           |           |
| COH* + O* = COOH* + *                          |           |           |           |
| <hr/>                                          |           |           |           |
| Mo                                             | 3.238185  | 9.310645  | 0.975751  |
| Mo                                             | 9.578605  | 9.370226  | 0.942805  |
| Mo                                             | -0.016694 | 9.314933  | 0.951001  |
| Mo                                             | 6.318067  | 9.371563  | 0.974829  |
| Mo                                             | 11.151898 | 9.324962  | 3.648227  |
| Mo                                             | 7.964133  | 9.320435  | 3.685522  |
| Mo                                             | 1.594895  | 9.330258  | 3.706963  |
| Mo                                             | 4.779078  | 9.332958  | 3.752772  |
| Mo                                             | 9.559249  | 9.303221  | 3.698130  |
| Mo                                             | -0.038595 | 9.317422  | 6.395282  |
| Mo                                             | 6.368252  | 9.307582  | 6.478438  |
| Mo                                             | 3.179001  | 9.315548  | 6.500677  |
| Mo                                             | 5.001103  | 9.292777  | 9.420996  |
| Mo                                             | 1.293593  | 9.313180  | 9.124959  |
| Mo                                             | 11.117845 | 9.298653  | 9.117942  |
| Mo                                             | 8.201051  | 9.267989  | 9.197599  |
| S                                              | 1.614564  | 7.952000  | -0.147865 |
| S                                              | 4.763537  | 7.778221  | 0.067298  |
| S                                              | 11.170928 | 7.844034  | -0.020166 |
| S                                              | 1.614582  | 10.685430 | -0.146269 |
| S                                              | 7.942703  | 8.012218  | -0.164220 |
| S                                              | 7.940588  | 10.746863 | -0.131976 |
| S                                              | 4.791132  | 10.916230 | 0.089094  |
| S                                              | 11.152353 | 10.859698 | 0.004918  |
| S                                              | 3.198659  | 10.892089 | 2.805307  |
| S                                              | 0.014285  | 7.754844  | 2.768713  |
| S                                              | 6.364766  | 10.898516 | 2.827902  |
| S                                              | 9.552442  | 7.759591  | 2.725442  |
| S                                              | 6.358641  | 7.765182  | 2.780736  |
| S                                              | 3.190604  | 7.763967  | 2.814734  |
| S                                              | 9.546995  | 10.910076 | 2.774339  |
| S                                              | 0.006972  | 10.900610 | 2.758253  |
| S                                              | 1.599970  | 7.759176  | 5.544913  |
| S                                              | 7.947527  | 10.869530 | 5.531725  |
| S                                              | 4.759224  | 7.746386  | 5.591406  |
| S                                              | 1.600131  | 10.878999 | 5.555882  |
| S                                              | 11.145180 | 7.748607  | 5.557572  |
| S                                              | 7.945117  | 7.750983  | 5.510378  |
| S                                              | 4.764858  | 10.883613 | 5.607823  |
| S                                              | 11.136529 | 10.881180 | 5.471912  |
| S                                              | 3.176376  | 7.835771  | 8.460224  |
| S                                              | -0.129410 | 10.986377 | 8.211815  |
| S                                              | 6.443484  | 7.705902  | 8.331183  |
| S                                              | -0.098551 | 10.640692 | 8.214795  |
| S                                              | 6.450106  | 10.879089 | 8.365993  |
| S                                              | 9.586694  | 7.643335  | 8.209855  |
| S                                              | 9.579260  | 10.928853 | 8.383556  |
| S                                              | 3.161509  | 10.772902 | 8.468389  |
| S                                              | 6.685772  | 9.193633  | 11.042547 |
| S                                              | -0.276125 | 9.413789  | 11.004118 |
| S                                              | 9.631133  | 9.252047  | 11.006079 |
| C                                              | 1.901940  | 9.060648  | 10.959602 |
| O                                              | 2.045708  | 8.717897  | 12.208625 |
| O                                              | 3.894431  | 9.332204  | 10.854579 |
| H                                              | 3.034912  | 8.731163  | 12.333514 |
| <hr/>                                          |           |           |           |
| HCOO* + # = CO <sub>2</sub> * + H <sup>+</sup> |           |           |           |
| <hr/>                                          |           |           |           |
| Mo                                             | 3.091114  | 9.444922  | 1.058521  |
| Mo                                             | 9.548410  | 9.298352  | 1.050912  |
| Mo                                             | 0.019995  | 9.227293  | 1.061684  |
| Mo                                             | 6.315075  | 9.388088  | 1.056524  |
| Mo                                             | 11.191596 | 9.311531  | 3.763494  |
| Mo                                             | 7.930059  | 9.326873  | 3.727004  |
| Mo                                             | 1.563206  | 9.305490  | 3.813502  |
| Mo                                             | 4.741165  | 9.332304  | 3.770965  |
| Mo                                             | 9.516620  | 9.302374  | 4.686952  |
| Mo                                             | -0.037031 | 9.282079  | 5.626230  |
| Mo                                             | 6.339867  | 9.311568  | 6.480716  |
| Mo                                             | 3.147715  | 9.284959  | 6.573386  |
| Mo                                             | 4.980087  | 9.316230  | 9.270384  |
| Mo                                             | 1.260122  | 9.296023  | 9.377984  |
| Mo                                             | 11.239614 | 9.250556  | 9.257532  |
| Mo                                             | 7.789402  | 9.254272  | 9.251888  |
| S                                              | 1.535702  | 7.789894  | 0.114722  |
| S                                              | 4.703441  | 8.121210  | -0.141330 |
| S                                              | 11.138546 | 7.836230  | 0.006144  |
| S                                              | 1.572420  | 10.901215 | 0.145586  |
| S                                              | 7.915311  | 7.966461  | -0.041589 |
| S                                              | 7.946365  | 10.737517 | -0.020361 |
| S                                              | 4.723355  | 10.859056 | 0.028481  |
| S                                              | 11.169421 | 10.574273 | -0.123691 |
| S                                              | 3.141310  | 10.913427 | 2.945038  |

|   |           |           |           |
|---|-----------|-----------|-----------|
| S | -0.034473 | 7.724845  | 2.923679  |
| S | 6.325524  | 10.929337 | 2.879741  |
| S | 9.527031  | 7.731449  | 2.847567  |
| S | 6.324078  | 7.761697  | 2.811732  |
| S | 3.147336  | 7.776046  | 2.812967  |
| S | 9.545977  | 10.895638 | 2.828515  |
| S | -0.023140 | 10.861879 | 2.848070  |
| S | 1.581863  | 7.721723  | 5.640651  |
| S | 7.941782  | 10.881590 | 5.577758  |
| S | 4.731635  | 7.740039  | 5.600655  |
| S | 1.571538  | 10.853992 | 5.659095  |
| S | 11.111215 | 7.737376  | 5.595551  |
| S | 7.927045  | 7.750516  | 5.552791  |
| S | 4.713319  | 10.866548 | 5.635482  |
| S | 11.126845 | 10.862341 | 5.610844  |
| S | 3.104297  | 7.829217  | 8.578582  |
| S | -0.090957 | 10.916188 | 8.340062  |
| S | 6.327165  | 7.642333  | 8.219977  |
| S | -0.043478 | 7.627973  | 8.316394  |
| S | 6.402719  | 10.931973 | 8.322096  |
| S | 9.501769  | 7.746098  | 8.344592  |
| S | 9.519487  | 10.795209 | 8.400207  |
| S | 3.102134  | 10.784408 | 8.450041  |
| S | 6.591418  | 8.344861  | 11.166607 |
| S | -0.232906 | 9.033196  | 11.166848 |
| S | 9.474002  | 9.346939  | 10.931454 |
| C | 3.649698  | 9.836362  | 10.799703 |
| O | 2.442068  | 9.572229  | 11.128116 |
| O | 4.440035  | 10.742670 | 11.142754 |
| H | 5.302118  | 8.821520  | 11.357718 |

COOH\* + # = CO<sub>2</sub>\* + H<sup>+</sup>

|    |           |           |           |
|----|-----------|-----------|-----------|
| Mo | 3.218245  | 9.477422  | 1.006159  |
| Mo | 9.558821  | 9.304120  | 0.992947  |
| Mo | -0.025440 | 9.445120  | 1.002985  |
| Mo | 6.305500  | 9.268528  | 1.004399  |
| Mo | 11.145539 | 9.310034  | 3.700241  |
| Mo | 7.952978  | 9.307070  | 3.716865  |
| Mo | 1.579459  | 9.313458  | 3.731839  |
| Mo | 4.757230  | 9.310058  | 3.761953  |
| Mo | 9.556975  | 9.259378  | 6.439833  |
| Mo | -0.028979 | 9.232752  | 6.448768  |
| Mo | 6.352447  | 9.252894  | 6.481747  |
| Mo | 3.168739  | 9.261236  | 6.531379  |
| Mo | 5.503567  | 9.229322  | 9.339213  |
| Mo | 1.336919  | 9.203793  | 9.233553  |
| Mo | 11.235226 | 9.154591  | 9.200936  |
| Mo | 7.852250  | 9.201045  | 9.218584  |
| S  | 1.597648  | 8.195597  | -0.222614 |
| S  | 4.773267  | 7.841777  | 0.046870  |
| S  | 11.153008 | 7.916377  | -0.021312 |
| S  | 1.583850  | 10.914677 | -0.001410 |
| S  | 7.942102  | 7.882112  | -0.071149 |
| S  | 7.927600  | 10.605247 | -0.166758 |
| S  | 4.750715  | 10.945104 | 0.114784  |
| S  | 11.140919 | 10.878201 | 0.046012  |
| S  | 3.170863  | 10.922341 | 2.913383  |
| S  | -0.004938 | 7.776369  | 2.734094  |
| S  | 6.347870  | 10.873475 | 2.813070  |
| S  | 9.544373  | 7.735879  | 2.794489  |
| S  | 6.350390  | 7.737122  | 2.844714  |
| S  | 3.174353  | 7.791312  | 2.740733  |
| S  | 9.541963  | 10.887348 | 2.796264  |
| S  | -0.008218 | 10.927836 | 2.879375  |
| S  | 1.599885  | 7.712417  | 5.541527  |
| S  | 7.952312  | 10.835122 | 5.578383  |
| S  | 4.734668  | 7.707221  | 5.572515  |
| S  | 1.585921  | 10.826526 | 5.619404  |
| S  | 11.136054 | 7.699605  | 5.491223  |
| S  | 7.951369  | 7.712875  | 5.527570  |
| S  | 4.744126  | 10.839296 | 5.631067  |
| S  | 11.144659 | 10.836147 | 5.561465  |
| S  | 3.194396  | 7.770998  | 8.501626  |
| S  | -0.065158 | 10.830707 | 8.314244  |
| S  | 6.360576  | 7.588319  | 8.259447  |
| S  | -0.042226 | 7.533119  | 8.198682  |
| S  | 6.399215  | 10.855192 | 8.322402  |
| S  | 9.533607  | 7.676723  | 8.279051  |
| S  | 9.570684  | 10.755017 | 8.348194  |
| S  | 3.186669  | 10.709879 | 8.492412  |
| S  | 6.563050  | 8.883233  | 11.109902 |
| S  | -0.016320 | 8.540376  | 11.086309 |
| S  | 9.638453  | 9.354205  | 10.916732 |
| C  | 2.588125  | 9.706782  | 10.996552 |
| O  | 3.873107  | 9.438039  | 11.031814 |
| O  | 2.034228  | 10.317488 | 11.937357 |
| H  | 0.618776  | 9.660705  | 11.763707 |

H<sup>+</sup> + \* = H\* + #

|    |           |          |           |
|----|-----------|----------|-----------|
| Mo | 3.233139  | 9.214054 | 0.968611  |
| Mo | 9.616569  | 9.410385 | 0.967486  |
| Mo | -0.029264 | 9.210172 | 0.972572  |
| Mo | 6.349112  | 9.399820 | 0.975786  |
| Mo | 11.171972 | 9.328066 | 3.717428  |
| Mo | 7.980667  | 9.326253 | 3.707339  |
| Mo | 1.604900  | 9.329352 | 3.712025  |
| Mo | 4.784674  | 9.323640 | 3.716880  |
| Mo | 9.579001  | 9.335168 | 6.464199  |
| Mo | 0.005891  | 9.347962 | 6.465036  |
| Mo | 6.384989  | 9.336434 | 6.454165  |
| Mo | 3.188289  | 9.340850 | 6.491079  |
| Mo | 4.983128  | 9.345777 | 9.170349  |
| Mo | 1.460523  | 9.344840 | 9.171113  |
| Mo | 11.352622 | 9.341577 | 9.250743  |
| Mo | 7.798566  | 9.351272 | 9.251005  |
| S  | 1.602633  | 7.781852 | -0.061338 |
| S  | 4.788774  | 7.766578 | 0.045505  |

|   |           |           |           |
|---|-----------|-----------|-----------|
| S | 11.177865 | 7.764471  | 0.048789  |
| S | 1.600800  | 10.483931 | -0.247232 |
| S | 7.981565  | 8.114822  | -0.224422 |
| S | 7.976886  | 10.813847 | -0.084652 |
| S | 4.796719  | 10.836002 | 0.024463  |
| S | 11.166282 | 10.844712 | 0.026926  |
| S | 3.196572  | 10.863794 | 2.731932  |
| S | 0.013634  | 7.731565  | 2.852994  |
| S | 6.384809  | 10.910216 | 2.833075  |
| S | 9.577653  | 7.780170  | 2.751242  |
| S | 6.384954  | 7.772690  | 2.761633  |
| S | 3.190635  | 7.730532  | 2.844226  |
| S | 9.573955  | 10.911877 | 2.827648  |
| S | 0.010734  | 10.865781 | 2.736404  |
| S | 1.613095  | 7.781231  | 5.564876  |
| S | 7.990481  | 10.892091 | 5.541820  |
| S | 4.766525  | 7.775541  | 5.562229  |
| S | 1.610419  | 10.898936 | 5.543274  |
| S | 11.168767 | 7.772571  | 5.557755  |
| S | 7.990732  | 7.771014  | 5.545724  |
| S | 4.764442  | 10.892120 | 5.545135  |
| S | 11.163794 | 10.902747 | 5.542778  |
| S | 3.227586  | 7.830204  | 8.432558  |
| S | -0.027793 | 10.995849 | 8.278912  |
| S | 6.415724  | 7.704329  | 8.245612  |
| S | 0.017407  | 7.698513  | 8.260520  |
| S | 6.406397  | 10.989048 | 8.231626  |
| S | 9.574052  | 7.851006  | 8.387216  |
| S | 9.577525  | 10.832245 | 8.370388  |
| S | 3.204748  | 10.856323 | 8.436790  |
| S | 6.201612  | 9.340956  | 11.098339 |
| S | 0.097313  | 9.493424  | 11.159533 |
| S | 9.582258  | 9.345921  | 10.905289 |
| H | 1.470420  | 8.775493  | 10.962130 |

H\* + H<sup>+</sup> = H<sub>2</sub>\* + #

|    |           |           |           |
|----|-----------|-----------|-----------|
| Mo | 3.233011  | 9.210376  | 0.950175  |
| Mo | 9.612495  | 9.400624  | 0.967046  |
| Mo | -0.042484 | 9.217507  | 0.962646  |
| Mo | 6.336378  | 9.410851  | 0.963539  |
| Mo | 11.169318 | 9.317127  | 3.729450  |
| Mo | 7.976458  | 9.314617  | 3.720961  |
| Mo | 1.594249  | 9.324597  | 3.712148  |
| Mo | 4.782136  | 9.320496  | 3.714232  |
| Mo | 9.578665  | 9.331369  | 6.480503  |
| Mo | 0.013500  | 9.340800  | 6.483188  |
| Mo | 6.374905  | 9.328507  | 6.467736  |
| Mo | 3.176046  | 9.338375  | 6.470340  |
| Mo | 4.975306  | 9.345935  | 9.186101  |
| Mo | 1.494029  | 9.370129  | 9.246338  |
| Mo | 11.363405 | 9.356967  | 9.275332  |
| Mo | 7.779216  | 9.347851  | 9.260613  |
| S  | 1.589442  | 7.797266  | -0.088355 |
| S  | 4.778045  | 7.754444  | 0.049116  |
| S  | 11.165629 | 7.749595  | 0.063689  |
| S  | 1.592075  | 10.492597 | -0.252998 |
| S  | 7.973852  | 8.119001  | -0.233682 |
| S  | 7.978861  | 10.819484 | -0.080600 |
| S  | 4.796987  | 10.868557 | 0.048358  |
| S  | 11.157571 | 10.865853 | 0.055768  |
| S  | 3.188275  | 10.854295 | 2.724430  |
| S  | 0.007340  | 7.729313  | 2.840244  |
| S  | 6.388084  | 10.901838 | 2.834799  |
| S  | 9.571751  | 7.773027  | 2.761271  |
| S  | 6.381564  | 7.774877  | 2.752497  |
| S  | 3.182934  | 7.734400  | 2.830787  |
| S  | 9.568904  | 10.896832 | 2.835357  |
| S  | -0.000050 | 10.859044 | 2.740892  |
| S  | 1.599268  | 7.771980  | 5.558552  |
| S  | 7.984625  | 10.882037 | 5.553237  |
| S  | 4.764443  | 7.769898  | 5.553782  |
| S  | 1.596772  | 10.894586 | 5.534804  |
| S  | 11.170388 | 7.764377  | 5.579499  |
| S  | 7.986491  | 7.763997  | 5.563791  |
| S  | 4.766812  | 10.887434 | 5.538681  |
| S  | 11.165475 | 10.893768 | 5.554722  |
| S  | 3.222259  | 7.832152  | 8.380771  |
| S  | 0.007473  | 10.993709 | 8.281501  |
| S  | 6.394915  | 7.696176  | 8.262241  |
| S  | 0.050081  | 7.717007  | 8.323915  |
| S  | 6.394977  | 10.984515 | 8.242254  |
| S  | 9.585501  | 7.862533  | 8.405428  |
| S  | 9.572701  | 10.832731 | 8.381523  |
| S  | 3.221169  | 10.861925 | 8.385424  |
| S  | 6.215002  | 9.340081  | 11.115934 |
| S  | 0.021213  | 9.511723  | 11.254289 |
| S  | 9.581681  | 9.365925  | 10.911401 |
| H  | 1.383218  | 8.935441  | 11.140382 |
| H  | 2.745460  | 9.207780  | 10.524320 |

CHO\* + \* = CH\* + O\*

|    |           |          |          |
|----|-----------|----------|----------|
| Mo | 3.236883  | 9.216176 | 0.959651 |
| Mo | 9.617264  | 9.428032 | 0.953165 |
| Mo | -0.032257 | 9.213519 | 0.950003 |
| Mo | 6.345788  | 9.424845 | 0.953497 |
| Mo | 11.169772 | 9.335702 | 3.703010 |
| Mo | 7.982087  | 9.335775 | 3.699624 |
| Mo | 1.598836  | 9.336298 | 3.702950 |
| Mo | 4.789611  | 9.335845 | 3.708895 |
| Mo | 9.573031  | 9.345646 | 6.461140 |
| Mo | 0.001294  | 9.354519 | 6.468764 |
| Mo | 6.383037  | 9.342235 | 6.458314 |
| Mo | 3.190723  | 9.337460 | 6.457621 |
| Mo | 4.585959  | 9.340244 | 9.248926 |
| Mo | 1.706098  | 9.388447 | 9.206403 |
| Mo | 10.946717 | 9.368558 | 9.205623 |
| Mo | 8.138959  | 9.354393 | 9.243979 |

|   |           |           |           |
|---|-----------|-----------|-----------|
| S | 1.605318  | 7.774170  | -0.060848 |
| S | 4.788087  | 7.767095  | 0.047475  |
| S | 11.173094 | 7.763892  | 0.044665  |
| S | 1.604787  | 10.476214 | -0.270375 |
| S | 7.982049  | 8.146501  | -0.252990 |
| S | 7.980317  | 10.846972 | -0.089560 |
| S | 4.792670  | 10.866181 | 0.032131  |
| S | 11.166549 | 10.863387 | 0.020180  |
| S | 3.193251  | 10.870632 | 2.725178  |
| S | 0.010440  | 7.740586  | 2.832661  |
| S | 6.388746  | 10.920150 | 2.820289  |
| S | 9.573890  | 7.791567  | 2.734184  |
| S | 6.387782  | 7.793184  | 2.737321  |
| S | 3.191495  | 7.738961  | 2.842006  |
| S | 9.571732  | 10.923928 | 2.820943  |
| S | 0.009869  | 10.867975 | 2.714135  |
| S | 1.582442  | 7.785484  | 5.551079  |
| S | 7.971948  | 10.898985 | 5.537554  |
| S | 4.800115  | 7.777987  | 5.545333  |
| S | 1.591115  | 10.905941 | 5.531120  |
| S | 11.178213 | 7.787059  | 5.547622  |
| S | 7.976420  | 7.781602  | 5.539678  |
| S | 4.789405  | 10.903349 | 5.539521  |
| S | 11.179426 | 10.904270 | 5.531294  |
| S | 3.188029  | 7.693058  | 8.250855  |
| S | -0.061916 | 10.889483 | 8.364286  |
| S | 6.378311  | 7.848655  | 8.363771  |
| S | -0.039404 | 7.862459  | 8.400646  |
| S | 6.376916  | 10.846977 | 8.358132  |
| S | 9.552348  | 7.708553  | 8.261103  |
| S | 9.535983  | 11.000300 | 8.243887  |
| S | 3.195513  | 10.995696 | 8.249168  |
| S | 6.371244  | 9.360201  | 10.889734 |
| S | 0.335864  | 9.505155  | 11.492379 |
| S | 9.688386  | 3.709393  | 11.131364 |
| C | 1.526761  | 10.490022 | 10.963193 |
| O | 3.281514  | 9.198995  | 10.654403 |
| H | 2.070902  | 11.255660 | 11.522443 |

|    |           |           |           |
|----|-----------|-----------|-----------|
| Mo | 6.360472  | 9.335445  | 6.449252  |
| Mo | 3.185605  | 9.329883  | 6.513162  |
| Mo | 5.017608  | 9.345700  | 9.278309  |
| Mo | 1.313961  | 9.342106  | 9.249601  |
| Mo | 11.266061 | 9.337942  | 9.215001  |
| Mo | 7.812219  | 9.375811  | 9.184162  |
| S  | 1.597747  | 7.787367  | -0.067875 |
| S  | 4.778523  | 7.769876  | 0.046490  |
| S  | 11.171488 | 7.773094  | 0.039648  |
| S  | 1.597449  | 10.488158 | -0.250046 |
| S  | 7.967298  | 8.143711  | -0.247927 |
| S  | 7.965453  | 10.833163 | -0.088128 |
| S  | 4.780496  | 10.859377 | 0.037759  |
| S  | 11.165188 | 10.853409 | 0.023760  |
| S  | 3.181793  | 10.859801 | 2.742901  |
| S  | 0.009062  | 7.728005  | 2.843847  |
| S  | 6.368981  | 10.911088 | 2.836682  |
| S  | 9.566049  | 7.784412  | 2.728894  |
| S  | 6.369970  | 7.778926  | 2.746080  |
| S  | 3.179953  | 7.728476  | 2.844597  |
| S  | 9.563472  | 10.912602 | 2.820331  |
| S  | 0.010556  | 10.863611 | 2.738945  |
| S  | 1.608126  | 7.773175  | 5.583369  |
| S  | 7.973783  | 10.887317 | 5.529893  |
| S  | 4.754858  | 7.765257  | 5.569042  |
| S  | 1.612114  | 10.885376 | 5.564243  |
| S  | 11.157729 | 7.762432  | 5.533233  |
| S  | 7.965035  | 7.766939  | 5.531227  |
| S  | 4.746830  | 10.887366 | 5.555469  |
| S  | 11.161784 | 10.894458 | 5.526654  |
| S  | 3.147204  | 7.858214  | 8.484362  |
| S  | -0.041143 | 10.991076 | 8.258695  |
| S  | 6.378795  | 7.695181  | 8.267917  |
| S  | -0.049182 | 7.693864  | 8.260087  |
| S  | 6.377154  | 11.007344 | 8.216244  |
| S  | 9.546297  | 7.820600  | 8.327209  |
| S  | 9.567241  | 10.862864 | 8.306712  |
| S  | 3.163453  | 10.806848 | 8.482829  |
| S  | 6.479481  | 9.697762  | 11.079721 |
| S  | -0.074973 | 9.331413  | 11.227104 |
| S  | 9.554597  | 9.291325  | 10.869728 |
| C  | 3.843560  | 9.129255  | 11.051221 |
| O  | 2.555857  | 9.38262   | 11.012234 |
| H  | 4.190753  | 8.909605  | 12.078939 |
| H  | 1.436487  | 9.254502  | 11.636057 |

| CH <sub>3</sub> O* + * = CH <sub>2</sub> * + O* |           |           |           |
|-------------------------------------------------|-----------|-----------|-----------|
| Mo                                              | 3.228611  | 9.219971  | 0.955362  |
| Mo                                              | 9.590023  | 9.432421  | 0.913963  |
| Mo                                              | -0.043951 | 9.210372  | 0.916284  |
| Mo                                              | 6.310914  | 9.425191  | 0.958769  |
| Mo                                              | 11.147122 | 9.329049  | 3.640866  |
| Mo                                              | 7.954525  | 9.328276  | 3.687322  |
| Mo                                              | 1.591781  | 9.336443  | 3.701006  |
| Mo                                              | 4.767329  | 9.331923  | 3.753006  |
| Mo                                              | 9.572960  | 9.326509  | 6.402474  |
| Mo                                              | -0.032071 | 9.344812  | 6.382579  |
| Mo                                              | 6.367635  | 9.328145  | 6.495384  |
| Mo                                              | 3.164266  | 9.328548  | 6.526637  |
| Mo                                              | 4.962923  | 9.303831  | 9.464727  |
| Mo                                              | 1.266811  | 9.344000  | 9.188452  |
| Mo                                              | 11.126825 | 9.331282  | 9.144523  |
| Mo                                              | 8.216051  | 9.315567  | 9.198930  |
| S                                               | 1.604322  | 7.783954  | -0.091585 |
| S                                               | 4.768269  | 7.754646  | 0.059297  |
| S                                               | 11.158803 | 7.768494  | 0.008093  |
| S                                               | 1.603128  | 10.478446 | -0.289766 |
| S                                               | 7.937020  | 8.151694  | -0.273073 |
| S                                               | 7.937100  | 10.847421 | -0.103926 |
| S                                               | 4.771581  | 10.884499 | 0.049405  |
| S                                               | 11.144565 | 10.866922 | -0.005094 |
| S                                               | 3.186161  | 10.865953 | 2.740740  |
| S                                               | 0.010634  | 7.739643  | 2.798357  |
| S                                               | 6.353757  | 10.914552 | 2.838702  |
| S                                               | 9.539179  | 7.789851  | 2.685112  |
| S                                               | 6.351057  | 7.791140  | 2.751957  |
| S                                               | 3.183563  | 7.745991  | 2.844645  |
| S                                               | 9.535487  | 10.919534 | 2.781097  |
| S                                               | 0.004800  | 10.863297 | 2.682259  |
| S                                               | 1.601589  | 7.777469  | 5.548049  |
| S                                               | 7.944554  | 10.882941 | 5.529996  |
| S                                               | 4.753264  | 7.769761  | 5.610429  |
| S                                               | 1.609152  | 10.898211 | 5.539766  |
| S                                               | 11.146941 | 7.763991  | 5.451056  |
| S                                               | 7.947065  | 7.770856  | 5.520417  |
| S                                               | 4.749655  | 10.891251 | 5.615129  |
| S                                               | 3.133722  | 10.902454 | 5.445230  |
| S                                               | 3.133722  | 7.855503  | 8.495473  |
| S                                               | -0.093940 | 10.984140 | 8.179264  |
| S                                               | 6.455794  | 7.745751  | 8.362650  |
| S                                               | -0.076774 | 7.712739  | 8.209342  |
| S                                               | 6.446816  | 10.895690 | 8.369511  |
| S                                               | 9.626270  | 7.689047  | 8.207497  |
| S                                               | 9.603299  | 10.953101 | 8.226805  |
| S                                               | 3.149564  | 10.776238 | 8.538284  |
| S                                               | 6.760529  | 9.425013  | 11.030574 |
| S                                               | -0.081530 | 9.646444  | 11.082890 |
| S                                               | 9.722841  | 9.131557  | 11.005858 |
| S                                               | 1.900940  | 9.111671  | 11.194160 |
| C                                               | 3.968308  | 9.192361  | 10.921234 |
| H                                               | 1.964723  | 8.111202  | 11.636019 |
| H                                               | 2.169663  | 9.908985  | 11.891279 |

| CHOH* + * = CH* + OH* |           |          |          |
|-----------------------|-----------|----------|----------|
| Mo                    | 3.257334  | 9.200965 | 0.946389 |
| Mo                    | 9.632785  | 9.419560 | 0.941057 |
| Mo                    | -0.020177 | 9.194465 | 0.935924 |

|    |           |           |           |
|----|-----------|-----------|-----------|
| Mo | 6.355393  | 9.421666  | 0.942183  |
| Mo | 11.185034 | 9.356138  | 3.695212  |
| Mo | 7.998071  | 9.360210  | 3.703758  |
| Mo | 1.619580  | 9.360402  | 3.698048  |
| Mo | 4.806258  | 9.365803  | 3.707826  |
| Mo | 9.601886  | 9.405105  | 6.462608  |
| Mo | 0.026791  | 9.409402  | 6.452700  |
| Mo | 6.400647  | 9.415567  | 6.462845  |
| Mo | 3.214707  | 9.412459  | 6.466806  |
| Mo | 4.668393  | 9.474806  | 9.240048  |
| Mo | 1.722999  | 9.472228  | 9.150453  |
| Mo | 11.014818 | 9.456726  | 9.215922  |
| Mo | 8.197262  | 9.454457  | 9.259142  |
| S  | 1.623284  | 7.746285  | -0.057701 |
| S  | 4.806994  | 7.733342  | 0.070143  |
| S  | 11.184612 | 7.733128  | 0.058869  |
| S  | 1.620338  | 10.433405 | -0.310548 |
| S  | 7.992072  | 8.140892  | -0.263868 |
| S  | 7.995144  | 10.832391 | -0.111601 |
| S  | 4.807099  | 10.854836 | 0.010955  |
| S  | 11.181005 | 10.848821 | 0.003250  |
| S  | 3.207934  | 10.879374 | 2.693740  |
| S  | 0.030358  | 7.753260  | 2.844008  |
| S  | 6.407625  | 10.934632 | 2.795966  |
| S  | 9.583023  | 7.805167  | 2.747548  |
| S  | 6.403654  | 7.813720  | 2.753438  |
| S  | 3.212401  | 7.756070  | 2.854732  |
| S  | 9.586483  | 10.933640 | 2.793234  |
| S  | 0.026465  | 10.871124 | 2.682438  |
| S  | 1.619089  | 7.834504  | 5.567590  |
| S  | 7.997979  | 10.951093 | 5.519940  |
| S  | 4.814965  | 7.837874  | 5.569545  |
| S  | 1.618767  | 10.954772 | 5.503302  |
| S  | 11.197821 | 7.829993  | 5.555562  |
| S  | 7.989668  | 7.833708  | 5.569995  |
| S  | 4.807646  | 10.963051 | 5.516338  |
| S  | 11.200740 | 10.949191 | 5.498851  |
| S  | 3.230170  | 7.790514  | 8.301776  |
| S  | -0.014820 | 10.960936 | 8.317694  |
| S  | 6.409303  | 7.957118  | 8.391852  |
| S  | -0.018934 | 7.919077  | 8.378695  |
| S  | 6.429661  | 10.937204 | 8.340623  |
| S  | 9.594165  | 7.803017  | 8.286875  |
| S  | 9.593148  | 11.068850 | 8.230097  |
| S  | 3.235376  | 11.079038 | 8.263032  |
| S  | 6.321558  | 9.503360  | 10.917995 |
| S  | 0.311285  | 9.568381  | 11.405876 |
| S  | 9.692086  | 9.471604  | 11.125270 |
| C  | 1.675607  | 10.448911 | 10.981163 |
| O  | 3.139457  | 9.282783  | 10.910753 |
| H  | 2.136768  | 11.259362 | 11.549059 |
| H  | 3.042280  | 8.526815  | 11.528706 |

| CH <sub>2</sub> O* + H* = CH <sub>2</sub> OH* + # |           |           |           |
|---------------------------------------------------|-----------|-----------|-----------|
| Mo                                                | 1.833563  | 0.030008  | 1.585730  |
| Mo                                                | 3.235826  | 9.202233  | 0.988453  |
| Mo                                                | 9.539079  | 9.347261  | 0.984549  |
| Mo                                                | 0.013862  | 9.263658  | 0.992703  |
| Mo                                                | 6.307949  | 9.415505  | 0.991542  |
| Mo                                                | 11.156754 | 9.317491  | 3.662019  |
| Mo                                                | 7.968777  | 9.324504  | 3.693713  |
| Mo                                                | 1.584640  | 9.323676  | 3.709738  |
| Mo                                                | 4.764531  | 9.330214  | 3.739656  |
| Mo                                                | 9.564819  | 9.334538  | 6.417562  |
| Mo                                                | -0.013032 | 9.355488  | 6.428483  |
| Mo                                                | 6.360683  | 9.342678  | 6.440681  |
| Mo                                                | 3.183741  | 9.345741  | 6.505260  |
| Mo                                                | 5.010717  | 9.308661  | 9.295259  |
| Mo                                                | 1.349716  | 9.407410  | 9.218832  |
| Mo                                                | 11.279928 | 9.410492  | 9.189300  |
| Mo                                                | 7.803736  | 9.344845  | 9.189022  |
| S                                                 | 1.601825  | 7.795006  | -0.045006 |
| S                                                 | 4.751687  | 7.749844  | 0.067068  |
| S                                                 | 11.141457 | 7.915952  | -0.091853 |
| S                                                 | 1.623829  | 10.533768 | -0.202704 |
| S                                                 | 7.917311  | 8.066062  | -0.187043 |
| S                                                 | 7.946848  | 10.802053 | -0.065615 |
| S                                                 | 4.793783  | 10.860374 | 0.051219  |
| S                                                 | 11.171209 | 10.687571 | -0.102356 |
| S                                                 | 3.182922  | 10.865502 | 2.749238  |
| S                                                 | 0.004089  | 7.717966  | 2.812582  |
| S                                                 | 6.365274  | 10.911699 | 2.855610  |
| S                                                 | 9.546759  | 7.745290  | 2.759609  |
| S                                                 | 6.353560  | 7.775521  | 2.773406  |
| S                                                 | 3.179039  | 7.730699  | 2.872360  |
| S                                                 | 9.557187  | 10.910426 | 2.783204  |
| S                                                 | 0.005912  | 10.886702 | 2.752621  |
| S                                                 | 1.605171  | 7.782138  | 5.578477  |
| S                                                 | 7.967430  | 10.896979 | 5.526169  |
| S                                                 | 4.750271  | 7.774513  | 5.580406  |
| S                                                 | 1.608308  | 10.903176 | 5.541333  |
| S                                                 | 11.157210 | 7.768890  | 5.518084  |
| S                                                 | 7.964095  | 7.768443  | 5.535140  |
| S                                                 | 4.750497  | 10.909539 | 5.565815  |
| S                                                 | 11.146742 | 10.896376 | 5.485423  |
| S                                                 | 3.165167  | 7.876514  | 8.441040  |
| S                                                 | -0.047892 | 11.044629 | 8.167329  |
| S                                                 | 6.375304  | 7.692455  | 8.245198  |
| S                                                 | -0.032131 | 7.750983  | 8.286081  |
| S                                                 | 6.354969  | 10.983798 | 8.258779  |
| S                                                 | 9.575346  | 7.840882  | 8.328271  |
| S                                                 | 9.536054  | 10.873000 | 8.287362  |
| S                                                 | 3.192398  | 10.828820 | 8.489730  |
| S                                                 | 6.517558  | 9.400008  | 11.109301 |
| S                                                 | -0.051520 | 10.098283 | 11.091839 |
| S                                                 | 9.607442  | 9.325543  | 10.851473 |
| C                                                 | 3.754323  | 9.083444  | 11.105333 |

|   |          |          |           |
|---|----------|----------|-----------|
| O | 2.344447 | 8.962290 | 10.918150 |
| H | 3.936665 | 9.975611 | 11.732668 |
| H | 4.098943 | 8.198392 | 11.669154 |
| H | 1.080430 | 9.292648 | 11.582670 |

| CHOH* + H <sup>+</sup> = CH <sub>2</sub> OH* + # |           |           |           |
|--------------------------------------------------|-----------|-----------|-----------|
| Mo                                               | 3.226912  | 9.187956  | 1.006191  |
| Mo                                               | 9.527070  | 9.343205  | 0.993070  |
| Mo                                               | 0.004259  | 9.251805  | 1.004565  |
| Mo                                               | 6.295261  | 9.406733  | 1.002096  |
| Mo                                               | 11.148444 | 9.321057  | 3.668143  |
| Mo                                               | 7.949977  | 9.325293  | 3.700808  |
| Mo                                               | 1.580886  | 9.318548  | 3.721307  |
| Mo                                               | 4.757649  | 9.321534  | 3.763326  |
| Mo                                               | 9.543426  | 9.346297  | 6.403036  |
| Mo                                               | -0.016777 | 9.354975  | 6.432117  |
| Mo                                               | 6.356827  | 9.345746  | 6.482061  |
| Mo                                               | 3.177930  | 9.352200  | 6.528820  |
| Mo                                               | 4.943727  | 9.384282  | 9.272599  |
| Mo                                               | 1.280144  | 9.404288  | 9.244217  |
| Mo                                               | 11.269427 | 9.393254  | 9.145877  |
| Mo                                               | 7.828235  | 9.366957  | 9.179263  |
| S                                                | 1.592426  | 7.775980  | -0.021979 |
| S                                                | 4.742099  | 7.733038  | 0.088540  |
| S                                                | 11.130240 | 7.902984  | -0.073699 |
| S                                                | 1.616882  | 10.512148 | -0.197531 |
| S                                                | 7.906831  | 8.062606  | -0.180662 |
| S                                                | 7.931914  | 10.799790 | -0.053119 |
| S                                                | 4.777358  | 10.847296 | 0.061192  |
| S                                                | 11.161514 | 10.678984 | -0.091968 |
| S                                                | 3.179257  | 10.856381 | 2.762954  |
| S                                                | -0.005735 | 7.714327  | 2.829377  |
| S                                                | 6.345468  | 10.907494 | 2.864110  |
| S                                                | 9.535009  | 12.747326 | 2.772045  |
| S                                                | 6.342025  | 7.769441  | 2.787381  |
| S                                                | 3.173676  | 7.720531  | 2.895718  |
| S                                                | 9.543477  | 10.910168 | 2.787949  |
| S                                                | 0.004014  | 10.882253 | 2.756315  |
| S                                                | 1.608295  | 7.782849  | 5.594141  |
| S                                                | 7.941834  | 10.901765 | 5.525350  |
| S                                                | 4.754081  | 7.774053  | 5.621719  |
| S                                                | 1.612667  | 10.907429 | 5.548280  |
| S                                                | 11.143284 | 7.776719  | 5.520586  |
| S                                                | 7.940121  | 7.773893  | 5.545278  |
| S                                                | 4.754711  | 10.904861 | 5.588940  |
| S                                                | 11.142548 | 10.902207 | 5.485813  |
| S                                                | 3.121149  | 7.905060  | 8.510007  |
| S                                                | -0.053157 | 11.040561 | 8.185560  |
| S                                                | 6.379419  | 7.685855  | 8.343848  |
| S                                                | -0.044975 | 7.726476  | 8.244486  |
| S                                                | 6.394703  | 11.054311 | 8.291621  |
| S                                                | 9.551747  | 7.843667  | 8.292071  |
| S                                                | 9.538846  | 10.895911 | 8.258972  |
| S                                                | 3.137215  | 10.858727 | 8.471822  |
| S                                                | 6.625207  | 9.456984  | 11.201260 |
| S                                                | -0.192122 | 9.493634  | 11.073712 |
| S                                                | 9.549223  | 9.361870  | 10.820590 |
| C                                                | 3.900304  | 9.426479  | 10.982485 |
| O                                                | 2.500667  | 9.422994  | 10.983219 |
| H                                                | 4.230737  | 9.456211  | 12.029855 |
| H                                                | 5.786009  | 8.342136  | 10.998704 |
| H                                                | 2.059770  | 9.449261  | 11.861253 |

|   |           |           |           |
|---|-----------|-----------|-----------|
| S | -0.027101 | 7.690945  | 8.163189  |
| S | 6.371503  | 10.981286 | 8.255705  |
| S | 9.570537  | 7.820618  | 8.241053  |
| S | 9.566760  | 10.881847 | 8.245665  |
| S | 3.165487  | 10.791275 | 8.506530  |
| S | 6.649176  | 9.093837  | 11.070323 |
| S | -0.175398 | 9.296305  | 11.114893 |
| S | 9.609920  | 9.428632  | 10.793323 |
| C | 1.877314  | 9.209237  | 11.207647 |
| O | 3.974139  | 9.449614  | 11.005630 |
| H | 2.066560  | 8.225810  | 11.651006 |
| H | 2.023135  | 10.045806 | 11.892404 |
| H | 4.480083  | 9.334548  | 11.833384 |

| CH* + H <sup>+</sup> = CH <sub>2</sub> * + # |           |           |           |
|----------------------------------------------|-----------|-----------|-----------|
| Mo                                           | 3.225618  | 9.220936  | 0.930095  |
| Mo                                           | 9.602418  | 9.428051  | 0.966497  |
| Mo                                           | -0.060445 | 9.225624  | 0.949547  |
| Mo                                           | 6.335027  | 9.432572  | 0.945805  |
| Mo                                           | 11.152261 | 9.323855  | 3.736653  |
| Mo                                           | 7.962383  | 9.315794  | 3.731854  |
| Mo                                           | 1.586547  | 9.329487  | 3.682529  |
| Mo                                           | 4.781130  | 9.324575  | 3.684551  |
| Mo                                           | 9.558799  | 9.309275  | 6.489186  |
| Mo                                           | -0.002582 | 9.314733  | 6.463063  |
| Mo                                           | 6.358795  | 9.306966  | 6.480751  |
| Mo                                           | 3.188217  | 9.314729  | 6.417485  |
| Mo                                           | 4.643093  | 9.272763  | 9.215350  |
| Mo                                           | 1.782396  | 9.294308  | 9.218058  |
| Mo                                           | 11.417207 | 9.296428  | 9.303585  |
| Mo                                           | 7.746121  | 9.304274  | 9.298531  |
| S                                            | 1.576550  | 7.807526  | -0.102566 |
| S                                            | 4.774867  | 7.771536  | 0.025608  |
| S                                            | 11.148989 | 7.765424  | 0.051990  |
| S                                            | 1.576871  | 10.498268 | -0.269296 |
| S                                            | 7.974339  | 8.153868  | -0.257363 |
| S                                            | 7.975821  | 10.854667 | -0.081047 |
| S                                            | 4.793269  | 10.882984 | 0.031697  |
| S                                            | 11.139076 | 10.891172 | 0.059050  |
| S                                            | 3.181866  | 10.864964 | 2.705223  |
| S                                            | -0.012077 | 7.742119  | 2.824735  |
| S                                            | 6.389680  | 10.911342 | 2.826978  |
| S                                            | 9.557094  | 7.787266  | 2.755840  |
| S                                            | 6.381667  | 7.786055  | 2.722529  |
| S                                            | 3.176601  | 7.739126  | 2.801967  |
| S                                            | 9.551571  | 10.905370 | 2.853857  |
| S                                            | -0.017413 | 10.863885 | 2.733817  |
| S                                            | 1.576734  | 7.762697  | 5.505885  |
| S                                            | 7.960837  | 10.871542 | 5.588445  |
| S                                            | 4.796644  | 7.754582  | 5.502795  |
| S                                            | 1.578342  | 10.880202 | 5.515981  |
| S                                            | 11.145232 | 7.748278  | 5.569333  |
| S                                            | 7.965332  | 7.748096  | 5.570929  |
| S                                            | 4.792347  | 10.878264 | 5.519346  |
| S                                            | 11.148064 | 10.883996 | 5.583778  |
| S                                            | 3.183233  | 7.676226  | 8.208900  |
| S                                            | 0.075473  | 10.903625 | 8.332563  |
| S                                            | 6.328991  | 7.675684  | 8.331800  |
| S                                            | 0.062132  | 7.697745  | 8.307107  |
| S                                            | 6.310016  | 10.910994 | 8.357163  |
| S                                            | 9.568570  | 7.831872  | 8.403202  |
| S                                            | 9.569878  | 10.775824 | 8.412611  |

|   |          |           |           |
|---|----------|-----------|-----------|
| S | 3.201197 | 10.916899 | 8.237590  |
| S | 6.261800 | 9.254106  | 11.198856 |
| S | 0.114796 | 9.261550  | 11.089700 |
| S | 9.535643 | 9.315067  | 10.894453 |
| C | 3.174196 | 9.344515  | 10.706932 |
| H | 3.151179 | 9.279941  | 11.803527 |
| H | 4.818710 | 9.825664  | 11.029223 |

| CH <sub>2</sub> * + H <sup>+</sup> = CH <sub>3</sub> * + # |           |           |           |
|------------------------------------------------------------|-----------|-----------|-----------|
| Mo                                                         | 3.231664  | 9.221194  | 0.981844  |
| Mo                                                         | 9.609275  | 9.402022  | 0.986361  |
| Mo                                                         | -0.026014 | 9.226638  | 0.987799  |
| Mo                                                         | 6.351350  | 9.403099  | 0.988096  |
| Mo                                                         | 11.171051 | 9.318972  | 3.726660  |
| Mo                                                         | 7.981982  | 9.319446  | 3.719271  |
| Mo                                                         | 1.597666  | 9.318443  | 3.715916  |
| Mo                                                         | 4.784299  | 9.318182  | 3.722028  |
| Mo                                                         | 9.583322  | 9.314925  | 6.473581  |
| Mo                                                         | 0.006711  | 9.315048  | 6.480795  |
| Mo                                                         | 6.383611  | 9.317402  | 6.456349  |
| Mo                                                         | 3.190592  | 9.326738  | 6.479951  |
| Mo                                                         | 4.942286  | 9.325403  | 9.244989  |
| Mo                                                         | 1.460195  | 9.299199  | 9.246063  |
| Mo                                                         | 11.349179 | 9.310254  | 9.268517  |
| Mo                                                         | 7.802841  | 9.310904  | 9.261758  |
| S                                                          | 1.599675  | 7.794436  | -0.048338 |
| S                                                          | 4.786313  | 7.776599  | 0.051314  |
| S                                                          | 11.174566 | 7.780311  | 0.051657  |
| S                                                          | 1.601918  | 10.510838 | -0.215431 |
| S                                                          | 7.980582  | 8.110450  | -0.207612 |
| S                                                          | 7.980210  | 10.826420 | -0.053236 |
| S                                                          | 4.799137  | 10.842776 | 0.043768  |
| S                                                          | 11.164320 | 10.843132 | 0.043910  |
| S                                                          | 3.192898  | 10.863224 | 2.751365  |
| S                                                          | 0.007793  | 7.724800  | 2.851160  |
| S                                                          | 6.386438  | 10.907942 | 2.849434  |
| S                                                          | 9.576088  | 7.770402  | 2.763150  |
| S                                                          | 6.384146  | 7.769836  | 2.765613  |
| S                                                          | 3.189108  | 7.725569  | 2.847451  |
| S                                                          | 9.573845  | 10.908135 | 2.845546  |
| S                                                          | 0.006114  | 10.867766 | 2.759420  |
| S                                                          | 1.604360  | 7.763562  | 5.563633  |
| S                                                          | 7.994126  | 10.877783 | 5.562904  |
| S                                                          | 4.775999  | 7.759326  | 5.557196  |
| S                                                          | 1.601334  | 10.879693 | 5.553280  |
| S                                                          | 11.166040 | 7.752235  | 5.560335  |
| S                                                          | 7.990958  | 7.754572  | 5.552067  |
| S                                                          | 4.774921  | 10.882947 | 5.554060  |
| S                                                          | 11.174263 | 10.882376 | 5.565838  |
| S                                                          | 3.193683  | 7.801323  | 8.376579  |
| S                                                          | 0.036617  | 10.944662 | 8.309285  |
| S                                                          | 6.378358  | 7.692905  | 8.266091  |
| S                                                          | -0.004708 | 7.664432  | 8.286180  |
| S                                                          | 6.385393  | 10.938179 | 8.265504  |
| S                                                          | 9.578749  | 7.820850  | 8.383154  |
| S                                                          | 9.586991  | 10.800932 | 8.390724  |
| S                                                          | 3.192048  | 10.842108 | 8.377642  |
| S                                                          | 6.321745  | 9.303864  | 11.123787 |
| S                                                          | 0.031119  | 9.122305  | 11.261129 |
| S                                                          | 9.608559  | 9.311470  | 10.921500 |
| C                                                          | 3.215568  | 9.401096  | 10.637588 |
| H                                                          | 3.180771  | 8.551466  | 11.331287 |

|   |          |           |           |
|---|----------|-----------|-----------|
| H | 3.311131 | 10.348061 | 11.212770 |
| H | 1.241358 | 9.887772  | 11.168714 |

| CH <sub>3</sub> * + H <sup>+</sup> = CH <sub>4</sub> * + # |           |           |           |
|------------------------------------------------------------|-----------|-----------|-----------|
| Mo                                                         | 3.218359  | 9.370989  | 0.958475  |
| Mo                                                         | 9.591178  | 9.371770  | 0.958590  |
| Mo                                                         | -0.054520 | 9.272543  | 0.961983  |
| Mo                                                         | 6.317788  | 9.274936  | 0.964548  |
| Mo                                                         | 11.148703 | 9.319027  | 3.716600  |
| Mo                                                         | 7.945521  | 9.318515  | 3.725221  |
| Mo                                                         | 1.588348  | 9.320894  | 3.722606  |
| Mo                                                         | 4.767682  | 9.322159  | 3.732385  |
| Mo                                                         | 9.546484  | 9.319612  | 6.457916  |
| Mo                                                         | -0.013879 | 9.315738  | 6.467866  |
| Mo                                                         | 6.345944  | 9.319826  | 6.500535  |
| Mo                                                         | 3.196646  | 9.317914  | 6.500995  |
| Mo                                                         | 4.952219  | 9.316766  | 9.341077  |
| Mo                                                         | 1.323470  | 9.310126  | 9.201298  |
| Mo                                                         | 11.310016 | 9.319827  | 9.213364  |
| Mo                                                         | 7.797738  | 9.317770  | 9.246311  |
| S                                                          | 1.605488  | 7.965448  | -0.160767 |
| S                                                          | 4.804167  | 7.761545  | 0.060559  |
| S                                                          | 11.181653 | 7.764793  | 0.059817  |
| S                                                          | 1.557404  | 10.675502 | -0.163574 |
| S                                                          | 7.975879  | 7.971323  | -0.163198 |
| S                                                          | 7.930401  | 10.679115 | -0.160042 |
| S                                                          | 4.733314  | 10.886065 | 0.066690  |
| S                                                          | 11.111021 | 10.885379 | 0.068400  |
| S                                                          | 3.169845  | 10.891238 | 2.816162  |
| S                                                          | -0.000885 | 7.748826  | 2.817312  |
| S                                                          | 6.357138  | 10.877276 | 2.775728  |
| S                                                          | 9.548130  | 7.769420  | 2.767035  |
| S                                                          | 6.363545  | 7.749228  | 2.819767  |
| S                                                          | 3.180973  | 7.768505  | 2.767661  |
| S                                                          | 9.537856  | 10.886993 | 2.818085  |
| S                                                          | -0.012199 | 10.875105 | 2.771353  |
| S                                                          | 1.615838  | 7.764654  | 5.561633  |
| S                                                          | 7.944134  | 10.879167 | 5.561424  |
| S                                                          | 4.758574  | 7.754597  | 5.567990  |
| S                                                          | 1.608790  | 10.870343 | 5.566416  |
| S                                                          | 11.137636 | 7.754249  | 5.540808  |
| S                                                          | 7.943188  | 7.757952  | 5.563372  |
| S                                                          | 4.762980  | 10.883800 | 5.573501  |
| S                                                          | 11.141725 | 10.881717 | 5.542333  |
| S                                                          | 3.161288  | 7.832985  | 8.444783  |
| S                                                          | -0.041528 | 10.973319 | 8.231784  |
| S                                                          | 6.323460  | 7.679146  | 8.325714  |
| S                                                          | -0.045024 | 7.654291  | 8.232812  |
| S                                                          | 6.349944  | 10.956622 | 8.312182  |
| S                                                          | 9.540180  | 7.815342  | 8.346505  |
| S                                                          | 9.546351  | 10.825305 | 8.345626  |
| S                                                          | 3.157532  | 10.782759 | 8.480539  |
| S                                                          | 6.551740  | 9.376184  | 11.272846 |
| S                                                          | 0.031229  | 9.353506  | 11.097842 |
| S                                                          | 9.576988  | 9.325985  | 10.882991 |
| C                                                          | 3.556037  | 9.217706  | 11.201627 |
| H                                                          | 3.515599  | 10.276005 | 11.502813 |
| H                                                          | 2.525164  | 8.845421  | 11.017535 |
| H                                                          | 3.806998  | 8.633734  | 12.108856 |
| H                                                          | 5.192863  | 8.799907  | 11.192766 |

## 8. Transition state of elementary reaction on S edge

| H <sub>2</sub> O* + # = OH* + H <sup>+</sup> |           |          |          |
|----------------------------------------------|-----------|----------|----------|
| Mo                                           | 4.822641  | 3.123676 | 0.184381 |
| Mo                                           | 7.972391  | 3.118742 | 0.157915 |
| Mo                                           | 11.133598 | 3.120911 | 0.159387 |
| Mo                                           | 1.569074  | 3.121924 | 0.188654 |
| Mo                                           | 6.384808  | 3.093356 | 2.779753 |
| Mo                                           | 9.559861  | 3.093831 | 2.788598 |
| Mo                                           | 3.191501  | 3.101379 | 2.727355 |
| Mo                                           | -0.008581 | 3.102082 | 2.741649 |
| Mo                                           | 1.595312  | 3.059541 | 5.503588 |
| Mo                                           | 4.766722  | 3.094313 | 5.511323 |
| Mo                                           | 11.179070 | 3.094977 | 5.520922 |
| Mo                                           | 7.973631  | 3.034938 | 5.547840 |
| Mo                                           | 6.291273  | 3.042495 | 8.132074 |
| Mo                                           | 3.257265  | 3.096969 | 8.105463 |
| Mo                                           | -0.056431 | 3.097769 | 8.111284 |
| Mo                                           | 9.660020  | 3.042717 | 8.137704 |
| S                                            | 6.401542  | 1.506551 | 0.904345 |
| S                                            | -0.033898 | 1.500882 | 0.862393 |
| S                                            | 6.405956  | 4.719218 | 0.936864 |
| S                                            | 3.198447  | 4.732724 | 0.855558 |
| S                                            | 9.553471  | 1.521392 | 0.913198 |
| S                                            | 3.198925  | 1.502474 | 0.828212 |
| S                                            | -0.035628 | 4.732278 | 0.886910 |
| S                                            | 5.549600  | 4.702459 | 0.942909 |
| S                                            | 1.595783  | 4.644345 | 3.670806 |
| S                                            | 7.970478  | 1.512945 | 3.692769 |
| S                                            | 1.595274  | 1.531649 | 3.639665 |
| S                                            | 7.970509  | 4.632988 | 3.736989 |
| S                                            | 11.160891 | 4.657530 | 3.688496 |
| S                                            | 4.780249  | 4.656864 | 3.677445 |
| S                                            | 4.770706  | 1.539725 | 3.665071 |
| S                                            | 11.170601 | 1.540292 | 3.677358 |
| S                                            | 3.235328  | 1.471992 | 6.423189 |
| S                                            | 6.406911  | 4.649108 | 6.494902 |
| S                                            | 9.638091  | 1.451321 | 6.458194 |

|   |           |          |          |
|---|-----------|----------|----------|
| S | 9.538998  | 4.649234 | 6.501893 |
| S | 0.028142  | 4.679011 | 6.428359 |
| S | 3.165238  | 4.678404 | 6.422624 |
| S | -0.042423 | 1.473836 | 6.429583 |
| S | 6.307929  | 1.451511 | 6.450542 |
| S | 1.601280  | 1.693961 | 9.267167 |
| S | 4.761865  | 3.927213 | 9.619310 |
| S | 7.972874  | 2.159215 | 9.447787 |
| S | 11.193182 | 3.914947 | 9.630163 |
| O | 1.613972  | 4.291900 | 9.192627 |
| H | 1.640512  | 5.199045 | 9.559432 |
| H | 1.610502  | 3.192464 | 9.835745 |

| OH* + # = O* + H <sup>+</sup> |           |          |          |
|-------------------------------|-----------|----------|----------|
| Mo                            | 4.815562  | 3.084688 | 0.166395 |
| Mo                            | 7.969334  | 3.081789 | 0.161518 |
| Mo                            | 11.123195 | 3.083291 | 0.174720 |
| Mo                            | 1.599675  | 3.087328 | 0.191095 |
| Mo                            | 6.383458  | 3.097400 | 2.780019 |
| Mo                            | 9.559374  | 3.097188 | 2.777592 |
| Mo                            | 3.187774  | 3.107922 | 2.740007 |
| Mo                            | -0.000022 | 3.108809 | 2.735855 |
| Mo                            | 1.594182  | 3.126594 | 5.482387 |
| Mo                            | 4.777660  | 3.150837 | 5.543539 |
| Mo                            | 11.166966 | 3.152521 | 5.541924 |
| Mo                            | 7.972041  | 3.079032 | 5.520360 |
| Mo                            | 6.423081  | 3.097365 | 8.149768 |
| Mo                            | 3.147514  | 3.234437 | 8.171541 |
| Mo                            | 0.044661  | 3.236657 | 8.171873 |
| Mo                            | 9.522801  | 3.098150 | 8.148758 |
| S                             | 6.389531  | 1.488690 | 0.932684 |
| S                             | -0.021682 | 1.477424 | 0.869018 |
| S                             | 6.394706  | 4.686075 | 0.914126 |
| S                             | 3.215140  | 4.706213 | 0.849802 |
| S                             | 9.547242  | 4.837302 | 0.930546 |
| S                             | 3.213616  | 1.478490 | 0.877493 |
| S                             | -0.023601 | 4.706808 | 0.836869 |

|    |           |          |           |
|----|-----------|----------|-----------|
| Mo | 6.418422  | 2.936627 | 8.067781  |
| Mo | 3.308706  | 3.170649 | 8.180846  |
| Mo | 0.053563  | 3.271232 | 8.181103  |
| Mo | 9.582850  | 3.085242 | 8.119998  |
| S  | 6.450731  | 1.446740 | 0.857734  |
| S  | -0.001519 | 1.479234 | 0.880097  |
| S  | 6.450317  | 4.666238 | 0.854907  |
| S  | 3.234515  | 4.681342 | 0.770297  |
| S  | 9.608447  | 1.485333 | 0.890914  |
| S  | 3.218756  | 1.458071 | 0.788099  |
| S  | -0.001294 | 4.698270 | 0.833746  |
| S  | 9.589355  | 4.663958 | 0.862782  |
| S  | 1.663841  | 4.675370 | 3.591475  |
| S  | 8.020395  | 1.506974 | 3.644430  |
| S  | 1.627820  | 1.554745 | 3.640634  |
| S  | 7.988255  | 4.629555 | 3.656080  |
| S  | 11.180154 | 4.682951 | 3.619179  |
| S  | 4.826191  | 4.611716 | 3.625288  |
| S  | 4.801716  | 1.507921 | 3.621068  |
| S  | 11.210277 | 1.567136 | 3.675040  |
| S  | 3.185721  | 1.538064 | 6.435412  |
| S  | 6.417639  | 4.623489 | 6.456170  |
| S  | 9.665321  | 1.509514 | 6.431381  |
| S  | 9.516538  | 4.703736 | 6.451143  |
| S  | 0.044755  | 4.741299 | 6.328966  |
| S  | 3.302728  | 4.714613 | 6.382130  |
| S  | 0.014061  | 1.652772 | 6.439119  |
| S  | 6.406704  | 1.410831 | 6.386730  |
| S  | 1.532819  | 1.955676 | 9.293960  |
| S  | 4.829735  | 2.219765 | 9.585097  |
| S  | 8.051803  | 2.101228 | 9.482743  |
| S  | 11.126037 | 3.872127 | 9.636095  |
| C  | 2.394020  | 4.546536 | 9.645298  |
| O  | 1.355109  | 4.774840 | 8.816076  |
| O  | 2.736747  | 5.158743 | 10.620391 |

|                       |           |          |           |
|-----------------------|-----------|----------|-----------|
| CO* + OH* = COOH* + * |           |          |           |
| Mo                    | 4.831953  | 3.158642 | 0.212727  |
| Mo                    | 8.002253  | 3.145825 | 0.185569  |
| Mo                    | 11.152041 | 3.144439 | 0.195096  |
| Mo                    | 1.542043  | 3.154476 | 0.217591  |
| Mo                    | 6.390598  | 3.126351 | 2.785210  |
| Mo                    | 9.566868  | 3.102756 | 2.827938  |
| Mo                    | 3.196186  | 3.140999 | 2.751457  |
| Mo                    | -0.005856 | 3.116856 | 2.799048  |
| Mo                    | 1.601046  | 3.115210 | 5.547538  |
| Mo                    | 4.805148  | 3.133823 | 5.519607  |
| Mo                    | 11.165214 | 3.072656 | 5.579783  |
| Mo                    | 7.957563  | 3.038502 | 5.567413  |
| Mo                    | 6.302407  | 3.013449 | 8.152950  |
| Mo                    | 3.240140  | 3.073786 | 8.158105  |
| Mo                    | 0.006211  | 3.216942 | 8.250302  |
| Mo                    | 9.525319  | 2.839001 | 8.206722  |
| S                     | 6.415561  | 1.532805 | 0.905642  |
| S                     | -0.029291 | 1.526213 | 0.925064  |
| S                     | 6.429835  | 4.756451 | 0.938975  |
| S                     | 3.187226  | 4.763389 | 0.865017  |
| S                     | 9.573715  | 1.544216 | 0.945747  |
| S                     | 3.189175  | 1.545846 | 0.847176  |
| S                     | -0.040450 | 4.752954 | 0.963689  |
| S                     | 9.573988  | 4.717984 | 0.994869  |
| S                     | 1.600595  | 4.676893 | 3.703603  |
| S                     | 7.956134  | 1.527968 | 3.696344  |
| S                     | 1.614589  | 1.569289 | 3.693093  |
| S                     | 7.982118  | 4.649907 | 3.774569  |
| S                     | 11.151747 | 4.652242 | 3.763485  |
| S                     | 4.794179  | 4.697838 | 3.691603  |
| S                     | 4.777932  | 1.573839 | 3.672930  |
| S                     | 11.177177 | 1.538496 | 3.723300  |
| S                     | 3.259217  | 1.516973 | 6.439466  |
| S                     | 6.433186  | 4.666549 | 6.537247  |
| S                     | 9.556102  | 1.394068 | 6.447889  |
| S                     | 9.547006  | 4.566263 | 6.624384  |
| S                     | -0.015097 | 4.699138 | 6.400178  |
| S                     | 3.186003  | 4.693696 | 6.497607  |
| S                     | 0.042387  | 1.536949 | 6.510716  |
| S                     | 6.298739  | 1.448491 | 6.446897  |
| S                     | 1.684712  | 1.925553 | 9.359480  |
| S                     | 4.793252  | 3.890618 | 9.636592  |
| S                     | 7.837863  | 2.094356 | 9.588810  |
| S                     | 11.188955 | 1.956344 | 9.504171  |
| C                     | 0.876017  | 4.836769 | 9.200304  |
| O                     | 1.578922  | 5.624878 | 9.720243  |
| O                     | 11.925178 | 4.970088 | 9.348383  |
| H                     | 11.682061 | 4.704496 | 10.261645 |

|                                 |           |          |          |
|---------------------------------|-----------|----------|----------|
| CO* + H <sup>+</sup> = CHO* + # |           |          |          |
| Mo                              | 4.847387  | 3.069378 | 0.183767 |
| Mo                              | 7.987732  | 3.070834 | 0.157417 |
| Mo                              | 11.155656 | 3.080126 | 0.160927 |
| Mo                              | 1.543382  | 3.075615 | 0.188753 |
| Mo                              | 6.392329  | 3.090598 | 2.770832 |
| Mo                              | 9.571606  | 3.098983 | 2.795620 |
| Mo                              | 3.194139  | 3.111125 | 2.723432 |
| Mo                              | -0.001001 | 3.120018 | 2.771735 |
| Mo                              | 1.619478  | 3.153901 | 5.494024 |
| Mo                              | 4.794932  | 3.152142 | 5.518853 |
| Mo                              | 11.153021 | 3.163599 | 5.543489 |
| Mo                              | 7.977253  | 3.098129 | 5.534112 |
| Mo                              | 6.302915  | 3.147294 | 8.115623 |
| Mo                              | 3.290183  | 3.279403 | 8.150461 |
| Mo                              | 0.030522  | 3.188660 | 8.198915 |
| Mo                              | 9.527199  | 3.141416 | 8.175573 |
| S                               | 6.421284  | 1.461709 | 0.926493 |
| S                               | -0.035166 | 1.476198 | 0.936839 |
| S                               | 6.422941  | 4.688110 | 0.897847 |
| S                               | 3.199203  | 4.686764 | 0.800521 |

|   |           |          |          |
|---|-----------|----------|----------|
| S | 9.575181  | 1.499179 | 0.948565 |
| S | 3.193388  | 1.477272 | 0.851950 |
| S | -0.033102 | 4.704716 | 0.888268 |
| S | 9.566578  | 4.664860 | 0.922139 |
| S | 1.611954  | 4.691348 | 3.637361 |
| S | 7.979288  | 1.529839 | 3.714653 |
| S | 1.606391  | 1.567650 | 3.684412 |
| S | 7.974714  | 4.655464 | 3.694394 |
| S | 11.156650 | 4.686392 | 3.684926 |
| S | 4.793245  | 4.673455 | 3.640822 |
| S | 4.772426  | 1.560715 | 3.695435 |
| S | 11.178290 | 1.568045 | 3.735967 |
| S | 3.186981  | 1.598007 | 6.489451 |
| S | 6.430542  | 4.738631 | 6.447994 |
| S | 9.607668  | 1.541029 | 6.509228 |
| S | 9.505983  | 4.732534 | 6.490452 |
| S | -0.002582 | 4.738933 | 6.425978 |
| S | 3.242321  | 4.787278 | 6.383915 |
| S | 0.022631  | 1.615585 | 6.447064 |
| S | 6.338737  | 1.513017 | 6.490450 |
| S | 1.583559  | 1.978098 | 9.370205 |
| S | 4.984990  | 3.549438 | 9.945830 |
| S | 7.948503  | 2.134437 | 9.442762 |
| S | 11.136098 | 3.910786 | 9.650164 |
| C | 1.664105  | 4.589050 | 8.700490 |
| O | 1.609048  | 5.669816 | 9.198345 |
| H | 3.344126  | 3.659550 | 9.888418 |

|                                 |           |          |          |
|---------------------------------|-----------|----------|----------|
| CO* + H <sup>+</sup> = COH* + # |           |          |          |
| Mo                              | 4.827195  | 3.094354 | 0.171481 |
| Mo                              | 7.963794  | 3.094020 | 0.161676 |
| Mo                              | 11.118833 | 3.087176 | 0.171810 |
| Mo                              | 1.681207  | 3.091271 | 0.173999 |
| Mo                              | 6.401474  | 3.132413 | 2.820774 |
| Mo                              | 9.574259  | 3.125926 | 2.760461 |
| Mo                              | 3.223172  | 3.128464 | 2.763972 |
| Mo                              | 0.020217  | 3.115594 | 2.695995 |
| Mo                              | 1.599391  | 3.107016 | 5.474375 |
| Mo                              | 4.801501  | 3.174923 | 5.566770 |
| Mo                              | 11.185431 | 3.153521 | 5.447031 |
| Mo                              | 8.009915  | 3.168656 | 5.572411 |
| Mo                              | 6.394149  | 3.219890 | 8.204579 |
| Mo                              | 3.163809  | 3.162428 | 8.200079 |
| Mo                              | -0.151804 | 3.066858 | 8.020458 |
| Mo                              | 9.811833  | 3.325617 | 8.109259 |
| S                               | 6.399111  | 1.520930 | 0.982842 |
| S                               | 0.022090  | 1.490715 | 0.815866 |
| S                               | 6.398028  | 4.691776 | 0.936455 |
| S                               | 3.252277  | 4.718191 | 0.886284 |
| S                               | 9.535175  | 1.489193 | 0.921452 |
| S                               | 3.256699  | 1.488122 | 0.927877 |
| S                               | 0.020868  | 4.699556 | 0.781975 |
| S                               | 9.542177  | 4.712346 | 0.879330 |
| S                               | 1.604268  | 4.679474 | 3.640882 |
| S                               | 7.999106  | 1.584489 | 3.763757 |
| S                               | 1.617983  | 1.557960 | 3.637011 |
| S                               | 7.999469  | 4.697235 | 3.706957 |
| S                               | 11.195617 | 4.699269 | 3.600811 |
| S                               | 4.797457  | 4.705221 | 3.708178 |
| S                               | 4.805132  | 1.589220 | 3.750861 |
| S                               | 11.179153 | 1.562738 | 3.641396 |
| S                               | 3.210277  | 1.579567 | 6.456027 |
| S                               | 6.420330  | 4.780304 | 6.516502 |
| S                               | 9.654005  | 1.620086 | 6.551767 |
| S                               | 9.618822  | 4.820563 | 6.397523 |
| S                               | 0.008757  | 4.707886 | 6.396602 |
| S                               | 3.157635  | 4.728132 | 6.469386 |
| S                               | 0.004837  | 1.472212 | 6.319945 |
| S                               | 6.387388  | 1.599784 | 6.567201 |
| S                               | 1.553913  | 1.935546 | 9.354844 |
| S                               | 4.740670  | 3.836760 | 9.723452 |
| S                               | 8.127690  | 2.523885 | 9.581862 |
| S                               | 11.348881 | 3.834540 | 9.933586 |
| C                               | 1.412565  | 4.194396 | 8.911354 |
| O                               | 1.190586  | 5.099112 | 9.733960 |
| H                               | -0.224646 | 4.804375 | 9.954061 |

|                       |           |          |          |
|-----------------------|-----------|----------|----------|
| CHO* + O* = HCOO* + * |           |          |          |
| Mo                    | 4.779043  | 3.146123 | 0.196951 |
| Mo                    | 7.916002  | 3.149709 | 0.203788 |
| Mo                    | 11.189953 | 3.168674 | 0.202767 |
| Mo                    | 1.657242  | 3.162444 | 0.182960 |
| Mo                    | 6.387185  | 3.102277 | 2.809278 |
| Mo                    | 9.569894  | 3.130866 | 2.739265 |
| Mo                    | 3.195491  | 3.132035 | 2.809980 |
| Mo                    | 0.008172  | 3.160778 | 2.749276 |
| Mo                    | 1.598390  | 3.156869 | 5.539135 |
| Mo                    | 4.788000  | 3.073790 | 5.607285 |
| Mo                    | 11.144302 | 3.155879 | 5.503757 |
| Mo                    | 8.002784  | 3.017261 | 5.547673 |
| Mo                    | 6.449347  | 2.706868 | 8.230876 |
| Mo                    | 3.139848  | 3.357988 | 8.276087 |
| Mo                    | -0.087658 | 3.279121 | 8.256348 |
| Mo                    | 9.677915  | 2.966665 | 8.142887 |
| S                     | 6.348498  | 1.526038 | 0.932761 |
| S                     | 0.045710  | 1.556255 | 0.875847 |
| S                     | 6.349772  | 4.739367 | 0.984602 |
| S                     | 3.223507  | 4.747657 | 0.978025 |
| S                     | 9.560844  | 1.540946 | 0.826535 |
| S                     | 3.203328  | 1.547536 | 0.954540 |
| S                     | 0.050592  | 4.777104 | 0.882079 |
| S                     | 9.542453  | 4.763378 | 0.866364 |
| S                     | 1.597755  | 4.709725 | 3.696070 |
| S                     | 8.009696  | 1.526248 | 3.659312 |
| S                     | 1.575017  | 1.591310 | 3.715691 |
| S                     | 7.977100  | 4.642470 | 3.758374 |
| S                     | 11.142765 | 4.711145 | 3.664340 |

|   |           |          |          |
|---|-----------|----------|----------|
| S | 4.818106  | 4.647699 | 3.780501 |
| S | 4.772078  | 1.555513 | 3.737131 |
| S | 11.184388 | 1.591616 | 3.661001 |
| S | 3.137540  | 1.570969 | 6.528181 |
| S | 6.428379  | 4.505926 | 6.699850 |
| S | 9.683616  | 1.434320 | 6.392120 |
| S | 9.507815  | 4.640669 | 6.540877 |
| S | -0.024830 | 4.753187 | 6.424509 |
| S | 3.224315  | 4.741315 | 6.381506 |
| S | -0.038532 | 1.634030 | 6.515287 |
| S | 6.402006  | 1.350084 | 6.402923 |
| S | 1.449281  | 1.991344 | 9.325809 |
| S | 4.823973  | 1.805337 | 9.430752 |
| S | 8.167715  | 1.804203 | 9.440648 |
| S | 11.016409 | 3.780352 | 9.792127 |
| C | 2.014208  | 5.073073 | 8.851636 |
| O | 0.832349  | 4.985591 | 9.301332 |
| O | 3.666154  | 4.427500 | 9.682960 |
| H | 2.485828  | 6.069584 | 8.838304 |

|                       |           |          |          |
|-----------------------|-----------|----------|----------|
| COH* + O* = COOH* + * |           |          |          |
| Mo                    | 4.764558  | 3.132041 | 0.178226 |
| Mo                    | 7.919760  | 3.143982 | 0.187909 |
| Mo                    | 11.061512 | 3.132275 | 0.208101 |
| Mo                    | 1.599249  | 3.115588 | 0.205856 |
| Mo                    | 6.333929  | 3.138528 | 2.820242 |
| Mo                    | 9.511658  | 3.138461 | 2.797253 |
| Mo                    | 3.154742  | 3.099298 | 2.783946 |
| Mo                    | -0.038261 | 3.095441 | 2.735198 |
| Mo                    | 1.538263  | 3.058054 | 5.494591 |
| Mo                    | 4.760383  | 3.101277 | 5.579188 |
| Mo                    | 11.121393 | 3.096379 | 5.556193 |
| Mo                    | 7.911892  | 3.166710 | 5.562282 |
| Mo                    | 6.394174  | 3.151116 | 8.202393 |
| Mo                    | 3.010290  | 3.061188 |          |

|   |           |          |          |
|---|-----------|----------|----------|
| S | -0.034886 | 4.661697 | 6.436277 |
| S | 3.219424  | 4.610611 | 6.530592 |
| S | -0.070803 | 1.534381 | 6.483503 |
| S | 6.332482  | 1.311871 | 6.390558 |
| S | 1.487019  | 1.804719 | 9.278001 |
| S | 4.918125  | 2.810333 | 9.948881 |
| S | 8.015733  | 1.849538 | 9.366581 |
| S | 11.012593 | 3.753862 | 9.730375 |
| C | 2.231811  | 4.719236 | 9.313456 |
| O | 0.955427  | 4.768196 | 9.179075 |
| O | 3.053066  | 5.533757 | 9.691536 |
| H | 2.326507  | 3.224547 | 9.706459 |

| COOH* + # = CO <sub>2</sub> + * + H <sup>+</sup> |           |          |           |
|--------------------------------------------------|-----------|----------|-----------|
| Mo                                               | 4.801490  | 3.131162 | 0.194106  |
| Mo                                               | 7.966617  | 3.117159 | 0.175992  |
| Mo                                               | 11.158195 | 3.117911 | 0.179986  |
| Mo                                               | 1.555603  | 3.132195 | 0.187817  |
| Mo                                               | 6.378778  | 3.126131 | 2.813551  |
| Mo                                               | 9.560147  | 3.102272 | 2.831156  |
| Mo                                               | 3.182944  | 3.151876 | 2.796222  |
| Mo                                               | -0.010665 | 3.124029 | 2.819710  |
| Mo                                               | 1.592104  | 3.153890 | 5.571784  |
| Mo                                               | 4.796773  | 3.178535 | 5.564751  |
| Mo                                               | 11.151662 | 3.086978 | 5.572882  |
| Mo                                               | 7.968490  | 3.081329 | 5.593947  |
| Mo                                               | 6.309557  | 3.108827 | 8.220382  |
| Mo                                               | 3.212679  | 3.270743 | 8.256926  |
| Mo                                               | -0.207799 | 3.075212 | 8.208511  |
| Mo                                               | 9.675329  | 3.021374 | 8.184458  |
| S                                                | 6.381404  | 1.527232 | 0.940649  |
| S                                                | -0.014776 | 1.530872 | 0.950792  |
| S                                                | 6.394758  | 4.721537 | 0.936062  |
| S                                                | 3.177111  | 4.730078 | 0.895467  |
| S                                                | 9.560593  | 1.535779 | 0.946086  |
| S                                                | 3.177085  | 1.549276 | 0.920392  |
| S                                                | -0.029642 | 4.719142 | 0.950892  |
| S                                                | 9.559646  | 4.687589 | 0.961488  |
| S                                                | 1.578631  | 4.701440 | 3.723758  |
| S                                                | 7.953024  | 1.545919 | 3.742924  |
| S                                                | 1.607191  | 1.588806 | 3.739854  |
| S                                                | 7.976556  | 4.658700 | 3.769057  |
| S                                                | 11.143050 | 4.666380 | 3.755930  |
| S                                                | 4.793619  | 4.707956 | 3.707143  |
| S                                                | 4.764349  | 1.595273 | 3.740446  |
| S                                                | 11.166128 | 1.538706 | 3.729863  |
| S                                                | 3.230605  | 1.626167 | 6.545832  |
| S                                                | 6.437112  | 4.714205 | 6.558335  |
| S                                                | 9.585403  | 1.455802 | 6.525202  |
| S                                                | 9.557154  | 4.663678 | 6.590399  |
| S                                                | -0.058266 | 4.685099 | 6.520780  |
| S                                                | 3.190432  | 4.760221 | 6.457157  |
| S                                                | 0.035872  | 1.521730 | 6.489132  |
| S                                                | 6.303773  | 1.523581 | 6.521065  |
| S                                                | 1.637915  | 1.989670 | 9.349647  |
| S                                                | 4.840175  | 3.917719 | 9.771491  |
| S                                                | 7.925198  | 2.127020 | 9.486128  |
| S                                                | 11.083366 | 2.960187 | 10.153728 |
| C                                                | 0.859867  | 4.699918 | 9.177945  |
| O                                                | -0.030713 | 5.366506 | 9.778618  |
| O                                                | 2.104725  | 4.940714 | 9.132776  |
| H                                                | 11.698789 | 4.320000 | 10.098218 |

| H <sup>+</sup> + * = H* + # |           |          |          |
|-----------------------------|-----------|----------|----------|
| Mo                          | 4.711573  | 3.090619 | 0.221626 |
| Mo                          | 8.060579  | 3.094098 | 0.215718 |
| Mo                          | 11.170584 | 3.106576 | 0.209265 |
| Mo                          | 1.599265  | 3.104019 | 0.202752 |
| Mo                          | 6.386929  | 3.107590 | 2.759891 |
| Mo                          | 9.583526  | 3.134700 | 2.811887 |
| Mo                          | 3.194035  | 3.115664 | 2.806310 |
| Mo                          | 0.005975  | 3.145210 | 2.845286 |
| Mo                          | 1.618093  | 3.142970 | 5.616762 |
| Mo                          | 4.796182  | 3.134697 | 5.507205 |
| Mo                          | 11.159343 | 3.202109 | 5.566591 |
| Mo                          | 7.976354  | 3.146857 | 5.563700 |
| Mo                          | 6.202874  | 3.251850 | 8.102071 |
| Mo                          | 3.552851  | 3.122480 | 8.142000 |
| Mo                          | -0.092907 | 3.217729 | 8.196118 |
| Mo                          | 9.648266  | 3.219774 | 8.166505 |
| S                           | 6.391093  | 1.501778 | 0.864450 |
| S                           | 0.006730  | 1.541075 | 1.007360 |
| S                           | 6.387133  | 4.688532 | 0.841578 |
| S                           | 3.159138  | 4.725599 | 0.938466 |
| S                           | 9.618806  | 1.489151 | 0.978159 |
| S                           | 3.145879  | 1.479903 | 0.964732 |
| S                           | 0.011792  | 4.695659 | 0.961844 |
| S                           | 9.608177  | 4.733326 | 0.933340 |
| S                           | 1.623845  | 4.685933 | 3.756176 |
| S                           | 7.983448  | 1.573109 | 3.734567 |
| S                           | 1.592659  | 1.587101 | 3.779883 |
| S                           | 7.963847  | 4.680798 | 3.692760 |
| S                           | 11.162264 | 4.728250 | 3.713730 |
| S                           | 4.801412  | 4.684452 | 3.663190 |
| S                           | 4.799316  | 1.547229 | 3.692711 |
| S                           | 11.166992 | 1.596794 | 3.772867 |
| S                           | 3.203545  | 1.503361 | 6.465392 |
| S                           | 6.376281  | 4.799000 | 6.420912 |
| S                           | 9.619411  | 1.582638 | 6.526794 |
| S                           | 9.532007  | 4.789806 | 6.487697 |
| S                           | 0.046883  | 4.782391 | 6.521965 |
| S                           | 3.264448  | 4.736279 | 6.517838 |
| S                           | -0.060284 | 1.594239 | 6.540382 |
| S                           | 6.354567  | 1.559193 | 6.533945 |
| S                           | 1.605822  | 2.345883 | 9.419515 |
| S                           | 4.854722  | 3.590771 | 9.995776 |
| S                           | 7.951720  | 2.388029 | 9.460092 |

|   |           |          |          |
|---|-----------|----------|----------|
| S | 11.143460 | 4.127845 | 9.666664 |
| H | 3.304707  | 4.356654 | 9.441878 |

| 2H* = H <sub>2</sub> + 2* |           |          |           |
|---------------------------|-----------|----------|-----------|
| Mo                        | 4.869354  | 3.077717 | 0.221805  |
| Mo                        | 7.995732  | 3.093084 | 0.205739  |
| Mo                        | 11.151702 | 3.100952 | 0.203229  |
| Mo                        | 1.550115  | 3.081741 | 0.215657  |
| Mo                        | 6.402518  | 3.116772 | 2.820729  |
| Mo                        | 9.577449  | 3.148081 | 2.847384  |
| Mo                        | 3.203192  | 3.113173 | 2.746507  |
| Mo                        | -0.000284 | 3.144463 | 2.791927  |
| Mo                        | 1.621853  | 3.150546 | 5.536190  |
| Mo                        | 4.785990  | 3.148568 | 5.522072  |
| Mo                        | 11.177575 | 3.220672 | 5.562730  |
| Mo                        | 7.988407  | 3.164620 | 5.625898  |
| Mo                        | 6.149494  | 3.234265 | 8.146641  |
| Mo                        | 3.352721  | 3.204467 | 8.103782  |
| Mo                        | 0.027365  | 3.177507 | 8.181787  |
| Mo                        | 9.704981  | 3.270547 | 8.221633  |
| S                         | 6.442610  | 1.480366 | 0.985432  |
| S                         | -0.036767 | 1.490070 | 0.963749  |
| S                         | 6.429044  | 4.707759 | 0.943515  |
| S                         | 3.210649  | 4.689531 | 0.828534  |
| S                         | 9.577188  | 1.529756 | 1.016386  |
| S                         | 3.206993  | 1.482741 | 0.871325  |
| S                         | -0.021022 | 4.724721 | 0.899284  |
| S                         | 9.570158  | 4.696805 | 0.958481  |
| S                         | 1.622821  | 4.691901 | 3.671567  |
| S                         | 7.998007  | 1.588823 | 3.808878  |
| S                         | 1.597693  | 1.582789 | 3.705627  |
| S                         | 7.973440  | 4.696270 | 3.757153  |
| S                         | 11.180536 | 4.738461 | 3.701954  |
| S                         | 4.785784  | 4.686611 | 3.664397  |
| S                         | 4.789687  | 1.560304 | 3.707501  |
| S                         | 11.174367 | 1.609182 | 3.773946  |
| S                         | 3.196037  | 1.539002 | 6.444813  |
| S                         | 6.362008  | 4.786374 | 6.489378  |
| S                         | 9.649043  | 1.622697 | 6.597199  |
| S                         | 9.562934  | 4.815477 | 6.528846  |
| S                         | 0.074771  | 4.768804 | 6.484120  |
| S                         | 3.233180  | 4.770606 | 6.407288  |
| S                         | -0.047606 | 1.599973 | 6.480372  |
| S                         | 6.363031  | 1.568912 | 6.572510  |
| S                         | 1.616913  | 1.969118 | 9.298651  |
| S                         | 4.804320  | 3.642669 | 10.039804 |
| S                         | 7.983630  | 2.602185 | 9.551663  |
| S                         | 11.304226 | 4.136512 | 9.644002  |
| H                         | 2.274190  | 4.419096 | 8.722137  |
| H                         | 3.393785  | 4.182045 | 9.704285  |

| CHO* + * = CH* + O* |           |          |          |
|---------------------|-----------|----------|----------|
| Mo                  | 4.831016  | 3.067758 | 0.147893 |
| Mo                  | 8.030958  | 3.058027 | 0.117082 |
| Mo                  | 11.157889 | 3.063898 | 0.123232 |
| Mo                  | 1.569640  | 3.073008 | 0.146150 |
| Mo                  | 6.401974  | 3.106406 | 2.702336 |
| Mo                  | 9.585376  | 3.095784 | 2.747713 |
| Mo                  | 3.209389  | 3.123392 | 2.672144 |
| Mo                  | 0.019036  | 3.114118 | 2.721188 |
| Mo                  | 1.626614  | 3.167811 | 5.465230 |
| Mo                  | 4.828157  | 3.185637 | 5.442312 |
| Mo                  | 11.176217 | 3.150437 | 5.522508 |
| Mo                  | 7.982309  | 3.129833 | 5.515513 |
| Mo                  | 6.387121  | 3.256750 | 8.144636 |
| Mo                  | 3.303021  | 3.292262 | 8.235440 |
| Mo                  | 0.140438  | 3.290265 | 8.372192 |
| Mo                  | 9.572286  | 3.059610 | 8.162828 |
| S                   | 6.433810  | 1.465532 | 0.868162 |
| S                   | -0.012958 | 1.472367 | 0.895212 |
| S                   | 6.441036  | 4.683112 | 0.813277 |
| S                   | 3.201483  | 4.704731 | 0.748393 |
| S                   | 9.596073  | 1.474726 | 0.923232 |
| S                   | 3.198792  | 1.467593 | 0.817966 |
| S                   | -0.021878 | 4.689736 | 0.840704 |
| S                   | 9.588733  | 4.667238 | 0.875621 |
| S                   | 1.621306  | 4.692254 | 3.596306 |
| S                   | 7.976354  | 1.554836 | 3.689932 |
| S                   | 1.627524  | 1.581821 | 3.655881 |
| S                   | 7.992207  | 4.660541 | 3.650235 |
| S                   | 11.176383 | 4.666985 | 3.656709 |
| S                   | 4.810926  | 4.698988 | 3.572133 |
| S                   | 4.793693  | 1.579485 | 3.642052 |
| S                   | 11.192854 | 1.573609 | 3.702583 |
| S                   | 3.236763  | 1.634679 | 6.391220 |
| S                   | 6.456022  | 4.782640 | 6.387236 |
| S                   | 9.583581  | 1.524160 | 6.475677 |
| S                   | 9.565789  | 4.709284 | 6.500016 |
| S                   | 0.026517  | 4.713313 | 6.402936 |
| S                   | 3.229881  | 4.738250 | 6.348685 |
| S                   | 0.033786  | 1.623336 | 6.444135 |
| S                   | 6.325759  | 1.598063 | 6.492681 |
| S                   | 1.707050  | 1.808119 | 9.215499 |
| S                   | 4.949974  | 4.400809 | 9.517885 |
| S                   | 7.894768  | 2.413112 | 9.622767 |
| S                   | 11.164307 | 2.310003 | 9.635524 |
| C                   | 2.715462  | 4.712317 | 9.341463 |
| O                   | 0.637982  | 4.708315 | 9.323231 |
| H                   | 2.613399  | 5.662764 | 9.874316 |

| CHO* + H* = CH <sub>2</sub> O* + # |           |          |          |
|------------------------------------|-----------|----------|----------|
| Mo                                 | 4.755516  | 3.105000 | 0.144957 |
| Mo                                 | 7.924638  | 3.089541 | 0.169658 |
| Mo                                 | 11.214529 | 3.106234 | 0.175222 |
| Mo                                 | 1.606722  | 3.116861 | 0.150698 |
| Mo                                 | 6.370893  | 3.104636 | 2.742118 |
| Mo                                 | 9.561620  | 3.098185 | 2.707381 |

|    |           |          |          |
|----|-----------|----------|----------|
| Mo | 3.184497  | 3.133385 | 2.781368 |
| Mo | 0.004590  | 3.133321 | 2.764190 |
| Mo | 1.596375  | 3.164178 | 5.538164 |
| Mo | 4.793203  | 3.147605 | 5.528862 |
| Mo | 11.129192 | 3.140157 | 5.502194 |
| Mo | 7.971815  | 3.050763 | 5.481411 |
| Mo | 6.448880  | 3.078260 | 8.135130 |
| Mo | 3.277009  | 3.291958 | 8.272013 |
| Mo | -0.106830 | 3.254052 | 8.217645 |
| Mo | 9.585121  | 3.038866 | 8.115408 |
| S  | 6.327178  | 1.485461 | 0.884618 |
| S  | 0.041678  | 1.508983 | 0.919455 |
| S  | 6.343427  | 4.709840 | 0.879463 |
| S  | 3.188206  | 4.707559 | 0.912890 |
| S  | 9.576015  | 1.487606 | 0.811625 |
| S  | 3.177101  | 1.530705 | 0.939150 |
| S  | 0.032340  | 4.729448 | 0.895128 |
| S  | 9.561097  | 4.705546 | 0.810935 |
| S  | 1.590467  | 4.704281 | 3.683350 |
| S  | 7.973758  | 1.521353 | 3.628357 |
| S  | 1.590980  | 1.587657 | 3.726400 |
| S  | 7.975990  | 4.642548 | 3.659205 |
| S  | 11.126793 | 4.680747 | 3.647427 |
| S  | 4.804976  | 4.684306 | 3.676228 |
| S  | 4.767251  | 1.571687 | 3.705341 |
| S  | 11.164675 | 1.567981 | 3.668524 |
| S  | 3.191547  | 1.626670 | 6.520907 |
| S  | 6.463386  | 4.687038 | 6.447203 |
| S  | 9.618418  | 1.465605 | 6.408903 |
| S  | 9.488975  | 4.677848 | 6.471264 |
| S  | -0.038425 | 4.728901 | 6.407218 |
| S  | 3.213724  | 4.748128 | 6.430860 |
| S  | -0.046986 | 1.612085 | 6.491306 |
| S  | 6.323221  | 1.495249 | 6.431351 |
| S  | 1.498135  | 1.928342 | 9.295490 |
| S  | 5.019862  | 4.097165 | 9.581039 |
| S  | 7.996405  | 2.001520 | 9.420086 |
| S  | 10.983971 | 3.781406 | 9.747091 |
| C  | 2.151209  | 4.820342 | 9.197776 |
| O  | 0.882531  | 4.860471 | 9.221073 |
| H  | 2.639584  | 5.688987 | 9.681140 |
| H  | 2.354961  | 3.222772 | 9.883298 |

|    |           |          |           |
|----|-----------|----------|-----------|
| Mo | 3.095054  | 3.219533 | 8.345091  |
| Mo | -0.122693 | 3.044080 | 8.194430  |
| Mo | 9.646357  | 3.089710 | 8.163649  |
| S  | 6.383173  | 1.541018 | 0.941998  |
| S  | -0.000161 | 1.540312 | 0.810456  |
| S  | 6.382032  | 4.711343 | 0.985607  |
| S  | 3.238912  | 4.746910 | 0.941137  |
| S  | 9.533158  | 1.527732 | 0.906984  |
| S  | 3.226639  | 1.519181 | 0.900423  |
| S  | 0.004722  | 4.750560 | 0.841082  |
| S  | 9.521716  | 4.750849 | 0.938307  |
| S  | 1.592178  | 4.665503 | 3.679365  |
| S  | 7.993931  | 1.534113 | 3.715889  |
| S  | 1.584308  | 1.553794 | 3.652236  |
| S  | 7.968533  | 4.648556 | 3.768619  |
| S  | 11.166554 | 4.681988 | 3.674856  |
| S  | 4.792022  | 4.640695 | 3.757646  |
| S  | 4.778368  | 1.536834 | 3.710973  |
| S  | 11.173464 | 1.562601 | 3.655210  |
| S  | 3.164018  | 1.515192 | 6.470853  |
| S  | 6.394780  | 4.591083 | 6.610284  |
| S  | 9.651272  | 1.479678 | 6.488318  |
| S  | 9.538954  | 4.687899 | 6.496406  |
| S  | 0.004953  | 4.639860 | 6.479275  |
| S  | 3.190464  | 4.637624 | 6.417766  |
| S  | -0.028470 | 1.491277 | 6.350056  |
| S  | 6.390778  | 1.413065 | 6.489153  |
| S  | 1.464023  | 1.705570 | 9.215269  |
| S  | 4.752021  | 2.160005 | 9.670032  |
| S  | 8.098944  | 2.196416 | 9.580713  |
| S  | 11.139258 | 4.022122 | 9.710021  |
| C  | 0.514400  | 4.629179 | 9.493097  |
| O  | 2.558919  | 4.608583 | 9.309578  |
| H  | 0.447421  | 5.692984 | 9.237367  |
| H  | 0.736743  | 4.450819 | 10.549817 |

| CHOH* + H* = CH* + OH* |           |          |           |
|------------------------|-----------|----------|-----------|
| Mo                     | 4.722195  | 3.168437 | 0.190372  |
| Mo                     | 8.035036  | 3.159766 | 0.180862  |
| Mo                     | 11.232183 | 3.182224 | 0.170451  |
| Mo                     | 1.586743  | 3.186989 | 0.182359  |
| Mo                     | 6.393686  | 3.072340 | 2.708265  |
| Mo                     | 9.591222  | 3.110152 | 2.747451  |
| Mo                     | 3.197400  | 3.116239 | 2.794886  |
| Mo                     | 0.020617  | 3.136036 | 2.817183  |
| Mo                     | 1.608220  | 3.097268 | 5.615895  |
| Mo                     | 4.821717  | 3.013484 | 5.500289  |
| Mo                     | 11.174736 | 3.073999 | 5.542221  |
| Mo                     | 7.988634  | 2.958618 | 5.470917  |
| Mo                     | 6.321468  | 2.800852 | 8.063233  |
| Mo                     | 3.601388  | 3.163624 | 8.178261  |
| Mo                     | -0.179447 | 3.048110 | 8.236680  |
| Mo                     | 9.500818  | 2.946050 | 8.113722  |
| S                      | 6.374892  | 1.534310 | 0.752815  |
| S                      | 0.031031  | 1.577300 | 0.937705  |
| S                      | 6.384473  | 4.743696 | 0.867904  |
| S                      | 3.164559  | 4.770396 | 0.979465  |
| S                      | 9.644910  | 1.544090 | 0.842557  |
| S                      | 3.145853  | 1.553981 | 0.904593  |
| S                      | 0.025388  | 4.765970 | 0.998767  |
| S                      | 9.622231  | 4.760430 | 0.929426  |
| S                      | 1.616892  | 4.664859 | 3.784963  |
| S                      | 7.997011  | 1.480197 | 3.574995  |
| S                      | 1.607930  | 1.570392 | 3.752461  |
| S                      | 7.970214  | 4.602574 | 3.704512  |
| S                      | 11.155386 | 4.665620 | 3.741449  |
| S                      | 4.840275  | 4.624334 | 3.710060  |
| S                      | 4.786968  | 1.504781 | 3.619629  |
| S                      | 11.188850 | 1.548791 | 3.680013  |
| S                      | 3.222180  | 1.493783 | 6.555529  |
| S                      | 6.442980  | 4.529519 | 6.532813  |
| S                      | 9.647786  | 1.395883 | 6.383196  |
| S                      | 9.482185  | 4.593642 | 6.470264  |
| S                      | 0.019920  | 4.659450 | 6.598212  |
| S                      | 3.288261  | 4.681744 | 6.432161  |
| S                      | -0.007703 | 1.456979 | 6.483883  |
| S                      | 6.368186  | 1.291814 | 6.336764  |
| S                      | 1.682775  | 2.024254 | 9.434690  |
| S                      | 5.018498  | 2.826409 | 9.970547  |
| S                      | 8.018641  | 1.813129 | 9.379359  |
| S                      | 10.918658 | 3.953829 | 9.587818  |
| C                      | 0.938714  | 3.524488 | 9.813540  |
| O                      | 2.818828  | 4.722823 | 9.287137  |
| H                      | 3.234825  | 4.720531 | 10.171583 |
| H                      | 0.962671  | 4.023704 | 10.783540 |

| CH <sub>2</sub> O* + H* = CH <sub>2</sub> OH* + # |           |          |          |
|---------------------------------------------------|-----------|----------|----------|
| Mo                                                | 4.761621  | 3.229726 | 0.217395 |
| Mo                                                | 7.858425  | 3.214847 | 0.226288 |
| Mo                                                | 11.220684 | 3.218653 | 0.231727 |
| Mo                                                | 1.565176  | 3.233851 | 0.218169 |
| Mo                                                | 6.346566  | 3.148524 | 2.829853 |
| Mo                                                | 9.538914  | 3.135170 | 2.770478 |
| Mo                                                | 3.163932  | 3.174666 | 2.859314 |
| Mo                                                | -0.019596 | 3.159411 | 2.830632 |
| Mo                                                | 1.571967  | 3.110030 | 5.620274 |
| Mo                                                | 4.765134  | 3.098230 | 5.613557 |
| Mo                                                | 11.116028 | 3.063415 | 5.544908 |
| Mo                                                | 7.952682  | 3.030342 | 5.552440 |
| Mo                                                | 6.324717  | 2.926826 | 8.159471 |
| Mo                                                | 3.349065  | 3.104423 | 8.268211 |
| Mo                                                | -0.230955 | 3.036067 | 8.178976 |
| Mo                                                | 9.622988  | 2.937460 | 8.140397 |
| S                                                 | 6.304074  | 1.581398 | 0.930381 |
| S                                                 | 0.021842  | 1.587347 | 0.935481 |
| S                                                 | 6.318918  | 4.820209 | 1.021952 |
| S                                                 | 3.164865  | 4.789351 | 1.031403 |

|   |           |          |           |
|---|-----------|----------|-----------|
| S | 9.539984  | 1.605210 | 0.813561  |
| S | 3.160670  | 1.643400 | 0.959172  |
| S | 0.008145  | 4.828484 | 1.017345  |
| S | 9.536438  | 4.782601 | 0.915362  |
| S | 1.561770  | 4.704640 | 3.809588  |
| S | 7.950322  | 1.546873 | 3.657597  |
| S | 1.577440  | 1.595159 | 3.746454  |
| S | 7.961211  | 4.663341 | 3.772322  |
| S | 11.109271 | 4.678954 | 3.754246  |
| S | 4.773760  | 4.699576 | 3.812149  |
| S | 4.746297  | 1.584465 | 3.731793  |
| S | 11.137154 | 1.555836 | 3.658763  |
| S | 3.197727  | 1.505032 | 6.559162  |
| S | 6.414935  | 4.621677 | 6.584767  |
| S | 9.581452  | 1.390301 | 6.440031  |
| S | 9.506709  | 4.618678 | 6.561865  |
| S | -0.099059 | 4.645805 | 6.516380  |
| S | 3.171097  | 4.678866 | 6.598305  |
| S | -0.021486 | 1.470701 | 6.460327  |
| S | 6.309065  | 1.398007 | 6.435840  |
| S | 1.563239  | 1.729952 | 9.304830  |
| S | 4.947486  | 3.378621 | 9.925591  |
| S | 7.973656  | 1.847629 | 9.353469  |
| S | 11.063848 | 3.059685 | 9.957872  |
| C | 1.039069  | 4.714601 | 9.228425  |
| O | 2.268278  | 4.277107 | 9.725052  |
| H | 1.182477  | 5.540697 | 8.520406  |
| H | 0.384660  | 5.019042 | 10.061576 |
| H | 1.905381  | 3.020100 | 10.068562 |

| CHOH* + H* = CH <sub>2</sub> OH* + # |           |          |           |
|--------------------------------------|-----------|----------|-----------|
| Mo                                   | 4.848868  | 3.211462 | 0.244509  |
| Mo                                   | 8.025583  | 3.201351 | 0.201937  |
| Mo                                   | 11.198187 | 3.209083 | 0.211838  |
| Mo                                   | 1.566300  | 3.220745 | 0.237040  |
| Mo                                   | 6.414952  | 3.109835 | 2.792697  |
| Mo                                   | 9.602643  | 3.101114 | 2.829310  |
| Mo                                   | 3.208929  | 3.140781 | 2.787790  |
| Mo                                   | 0.021911  | 3.130373 | 2.835417  |
| Mo                                   | 1.621676  | 3.063109 | 5.594455  |
| Mo                                   | 4.828461  | 3.061290 | 5.552754  |
| Mo                                   | 11.170275 | 3.047472 | 5.585292  |
| Mo                                   | 7.993824  | 2.956228 | 5.555911  |
| Mo                                   | 6.376795  | 2.876206 | 8.137425  |
| Mo                                   | 3.338610  | 3.056255 | 8.210364  |
| Mo                                   | -0.079227 | 3.131622 | 8.346063  |
| Mo                                   | 9.552769  | 2.886418 | 8.193817  |
| S                                    | 6.440623  | 1.563378 | 0.871906  |
| S                                    | 0.006986  | 1.580791 | 0.928303  |
| S                                    | 6.452072  | 4.794447 | 0.990861  |
| S                                    | 3.208572  | 4.804648 | 0.940823  |
| S                                    | 9.615276  | 1.587585 | 0.911560  |
| S                                    | 3.200692  | 1.591828 | 0.845963  |
| S                                    | -0.004820 | 4.802974 | 1.031109  |
| S                                    | 9.604886  | 4.759636 | 1.034186  |
| S                                    | 1.622161  | 4.666058 | 3.782305  |
| S                                    | 7.996602  | 1.493412 | 3.654879  |
| S                                    | 1.629214  | 1.558118 | 3.712550  |
| S                                    | 8.002360  | 4.612989 | 3.798409  |
| S                                    | 11.173649 | 4.654976 | 3.799091  |
| S                                    | 4.825892  | 4.661452 | 3.748912  |
| S                                    | 4.793912  | 1.551765 | 3.664029  |
| S                                    | 11.208751 | 1.532952 | 3.714414  |
| S                                    | 3.276305  | 1.465971 | 6.479376  |
| S                                    | 6.474987  | 4.568937 | 6.559487  |
| S                                    | 9.649333  | 1.360960 | 6.432462  |
| S                                    | 9.515737  | 4.552148 | 6.568578  |
| S                                    | 0.004544  | 4.612393 | 6.544824  |
| S                                    | 3.227952  | 4.624571 | 6.509926  |
| S                                    | 0.007439  | 1.494214 | 6.540018  |
| S                                    | 6.334384  | 1.341514 | 6.402837  |
| S                                    | 1.725785  | 1.646373 | 9.257210  |
| S                                    | 4.968720  | 3.679776 | 9.745244  |
| S                                    | 7.956354  | 1.788182 | 9.413034  |
| S                                    | 10.920520 | 3.887488 | 9.686994  |
| C                                    | 0.876059  | 4.448519 | 9.587188  |
| O                                    | 2.242823  | 4.624612 | 9.464726  |
| S                                    | 2.682629  | 5.084802 | 10.214269 |
| H                                    | 0.473058  | 5.098134 | 10.378025 |
| H                                    | 1.006266  | 2.862302 | 9.972970  |

| CH <sub>2</sub> OH* + * = CH <sub>2</sub> * + OH* |           |          |          |
|---------------------------------------------------|-----------|----------|----------|
| Mo                                                | 4.838816  | 3.276859 | 0.218679 |
| Mo                                                | 7.999145  | 3.267688 | 0.214307 |
| Mo                                                | 11.154137 | 3.271597 | 0.247958 |
| Mo                                                | 1.679491  | 3.283495 | 0.242741 |
| Mo                                                | 6.416864  | 3.128131 | 2.843842 |
| Mo                                                | 9.594954  | 3.112796 | 2.823907 |
| Mo                                                | 3.234845  | 3.155231 | 2.820245 |
| Mo                                                | 0.033857  | 3.137967 | 2.777193 |
| Mo                                                | 1.615462  | 3.007096 | 5.568229 |
| Mo                                                | 4.843387  | 3.033063 | 5.574197 |
| Mo                                                | 11.199066 | 2.955663 | 5.548483 |
| Mo                                                | 8.013288  | 2.945257 | 5.604880 |
| Mo                                                | 6.317321  | 2.855558 | 8.230682 |
| Mo                                                | 3.229964  | 3.042717 | 8.311470 |
| Mo                                                | -0.230816 | 2.784847 | 8.191103 |
| Mo                                                | 9.728138  | 2.820707 | 8.155644 |
| S                                                 | 6.415016  | 1.644698 | 0.903150 |
| S                                                 | 0.046354  | 1.635410 | 0.800412 |
| S                                                 | 6.427192  | 4.814020 | 1.072772 |
| S                                                 | 3.266392  | 4.856127 | 1.041473 |
| S                                                 | 9.570486  | 1.616930 | 0.872751 |
| S                                                 | 3.260063  | 1.637722 | 0.885343 |
| S                                                 | 0.034208  | 4.851121 | 0.977462 |
| S                                                 | 9.567559  | 4.832625 | 1.062319 |
| S                                                 | 1.610435  | 4.653844 | 3.801499 |

|   |           |          |           |
|---|-----------|----------|-----------|
| S | 8.003894  | 1.505199 | 3.680408  |
| S | 1.635365  | 1.552560 | 3.649273  |
| S | 8.018250  | 4.613450 | 3.860565  |
| S | 11.195558 | 4.626330 | 3.809159  |
| S | 4.836044  | 4.665614 | 3.815702  |
| S | 4.807198  | 1.543797 | 3.684832  |
| S | 11.212250 | 1.508462 | 3.618490  |
| S | 3.260167  | 1.462985 | 6.480064  |
| S | 6.468779  | 4.528159 | 6.647258  |
| S | 9.646111  | 1.285612 | 6.437097  |
| S | 9.601455  | 4.508625 | 6.605798  |
| S | -0.008255 | 4.483760 | 6.624716  |
| S | 3.216713  | 4.553886 | 6.507950  |
| S | 0.051258  | 1.294805 | 6.351414  |
| S | 6.349947  | 1.343852 | 6.464103  |
| S | 1.645041  | 1.627936 | 9.199831  |
| S | 4.875388  | 3.570698 | 9.859746  |
| S | 8.010739  | 1.869591 | 9.414017  |
| S | 11.139880 | 3.243540 | 10.019075 |
| C | 0.234232  | 4.198201 | 9.743519  |
| O | 2.243304  | 4.665565 | 9.159217  |
| H | -0.033388 | 5.256882 | 9.655999  |
| H | 0.681105  | 3.924404 | 10.702875 |
| H | 2.753306  | 5.098431 | 9.872410  |

| CH* + H* = CH <sub>2</sub> * + # |           |          |           |
|----------------------------------|-----------|----------|-----------|
| Mo                               | 4.841717  | 3.066655 | 0.160415  |
| Mo                               | 7.954271  | 3.070870 | 0.133483  |
| Mo                               | 11.142154 | 3.065842 | 0.129791  |
| Mo                               | 1.516040  | 3.060517 | 0.148621  |
| Mo                               | 6.373659  | 3.114359 | 2.747473  |
| Mo                               | 9.555378  | 3.106991 | 2.777195  |
| Mo                               | 3.176820  | 3.096284 | 2.686357  |
| Mo                               | -0.027925 | 3.091214 | 2.732268  |
| Mo                               | 1.593448  | 3.088708 | 5.488610  |
| Mo                               | 4.744007  | 3.164352 | 5.461638  |
| Mo                               | 11.160937 | 3.129037 | 5.486379  |
| Mo                               | 7.948962  | 3.164706 | 5.540720  |
| Mo                               | 6.218362  | 3.314256 | 8.082773  |
| Mo                               | 3.308738  | 3.147740 | 8.049461  |
| Mo                               | -0.168500 | 3.080891 | 8.070486  |
| Mo                               | 9.768056  | 3.196889 | 8.092576  |
| S                                | 6.406807  | 1.462373 | 0.920077  |
| S                                | -0.055712 | 1.506316 | 0.889710  |
| S                                | 6.402097  | 4.703091 | 0.863671  |
| S                                | 3.171950  | 4.672177 | 0.767365  |
| S                                | 9.545290  | 1.504306 | 0.932450  |
| S                                | 3.178608  | 1.470896 | 0.809994  |
| S                                | -0.048828 | 4.690270 | 0.854448  |
| S                                | 9.551825  | 4.655605 | 0.886837  |
| S                                | 1.581324  | 4.642741 | 3.628809  |
| S                                | 7.950783  | 1.574699 | 3.734950  |
| S                                | 1.588727  | 1.541754 | 3.635670  |
| S                                | 7.961422  | 4.681611 | 3.667141  |
| S                                | 11.163462 | 4.679198 | 3.648260  |
| S                                | 4.748416  | 4.688432 | 3.594359  |
| S                                | 4.769817  | 1.563095 | 3.654676  |
| S                                | 11.124255 | 1.540831 | 3.681503  |
| S                                | 3.215452  | 1.499484 | 6.389092  |
| S                                | 6.354441  | 4.818259 | 6.373853  |
| S                                | 9.567889  | 1.560593 | 6.507735  |
| S                                | 9.585952  | 4.779280 | 6.447602  |
| S                                | 0.003941  | 4.711706 | 6.443930  |
| S                                | 3.131290  | 4.731931 | 6.384287  |
| S                                | -0.027934 | 1.478977 | 6.406317  |
| S                                | 6.309976  | 1.613494 | 6.516208  |
| S                                | 1.615932  | 2.108344 | 9.468549  |
| S                                | 4.738608  | 4.030730 | 9.785054  |
| S                                | 7.915769  | 2.668513 | 9.483531  |
| S                                | 11.210013 | 3.182490 | 9.919170  |
| C                                | 1.546772  | 3.836271 | 9.205451  |
| C                                | 3.256351  | 4.369517 | 9.452015  |
| H                                | 1.430673  | 5.818364 | 10.057516 |

|                                                                                  |           |          |           |
|----------------------------------------------------------------------------------|-----------|----------|-----------|
| S                                                                                | 3.197405  | 1.558379 | 6.401191  |
| S                                                                                | 6.468466  | 4.648098 | 6.521080  |
| S                                                                                | 9.632857  | 1.437413 | 6.456513  |
| S                                                                                | 9.506360  | 4.657289 | 6.511325  |
| S                                                                                | 0.019654  | 4.680919 | 6.475815  |
| S                                                                                | 3.213775  | 4.647645 | 6.453927  |
| S                                                                                | 0.025272  | 1.535821 | 6.475752  |
| S                                                                                | 6.346791  | 1.433899 | 6.438269  |
| S                                                                                | 1.707756  | 1.663190 | 9.256150  |
| S                                                                                | 4.900912  | 3.838215 | 9.578425  |
| S                                                                                | 7.981172  | 2.062367 | 9.602428  |
| S                                                                                | 11.029451 | 3.999058 | 9.493264  |
| C                                                                                | 1.678407  | 4.478968 | 8.880757  |
| H                                                                                | 2.015466  | 4.493037 | 9.932313  |
| H                                                                                | 1.608751  | 5.504613 | 8.502744  |
| H                                                                                | 0.448012  | 3.498994 | 9.882725  |
| <hr/>                                                                            |           |          |           |
| CH <sub>3</sub> <sup>+</sup> + H <sup>+</sup> = CH <sub>4</sub> <sup>+</sup> + # |           |          |           |
| <hr/>                                                                            |           |          |           |
| Mo                                                                               | 4.762426  | 3.143187 | 0.249956  |
| Mo                                                                               | 8.070266  | 3.139929 | 0.245976  |
| Mo                                                                               | 11.197647 | 3.143695 | 0.221886  |
| Mo                                                                               | 1.621982  | 3.144454 | 0.219385  |
| Mo                                                                               | 6.415306  | 3.114842 | 2.794203  |
| Mo                                                                               | 9.602383  | 3.117329 | 2.834988  |
| Mo                                                                               | 3.218816  | 3.125629 | 2.824400  |
| Mo                                                                               | 0.031267  | 3.126670 | 2.848951  |
| Mo                                                                               | 1.627966  | 3.088181 | 5.597215  |
| Mo                                                                               | 4.815564  | 3.108479 | 5.569681  |
| Mo                                                                               | 11.200807 | 3.114268 | 5.600763  |
| Mo                                                                               | 8.001416  | 3.044288 | 5.582370  |
| Mo                                                                               | 6.353537  | 3.013173 | 8.183700  |
| Mo                                                                               | 3.284891  | 3.081058 | 8.190955  |
| Mo                                                                               | -0.059366 | 3.159065 | 8.235531  |
| Mo                                                                               | 9.639780  | 3.046100 | 8.199284  |
| S                                                                                | 6.415862  | 1.532449 | 0.875966  |
| S                                                                                | 0.032309  | 1.556745 | 0.980571  |
| S                                                                                | 6.419076  | 4.736852 | 0.909724  |
| S                                                                                | 3.187704  | 4.757029 | 0.976452  |
| S                                                                                | 9.639933  | 1.518458 | 0.962149  |
| S                                                                                | 3.186107  | 1.521331 | 0.955986  |
| S                                                                                | 0.032159  | 4.721670 | 1.001559  |
| S                                                                                | 9.634891  | 4.751402 | 0.993234  |
| S                                                                                | 1.632182  | 4.672320 | 3.773814  |
| S                                                                                | 8.000160  | 1.533015 | 3.712529  |
| S                                                                                | 1.630262  | 1.556128 | 3.746641  |
| S                                                                                | 7.996313  | 4.650650 | 3.770630  |
| S                                                                                | 11.184889 | 4.680363 | 3.772650  |
| S                                                                                | 4.832405  | 4.676275 | 3.738418  |
| S                                                                                | 4.819064  | 1.559620 | 3.715698  |
| S                                                                                | 11.198421 | 1.562535 | 3.756619  |
| S                                                                                | 3.272596  | 1.491043 | 6.490736  |
| S                                                                                | 6.449564  | 4.649393 | 6.560029  |
| S                                                                                | 9.658065  | 1.463419 | 6.506842  |
| S                                                                                | 9.546800  | 4.662404 | 6.559827  |
| S                                                                                | 0.041162  | 4.702246 | 6.514112  |
| S                                                                                | 3.215525  | 4.681540 | 6.518615  |
| S                                                                                | 0.000870  | 1.516225 | 6.528182  |
| S                                                                                | 6.346537  | 1.445576 | 6.483764  |
| S                                                                                | 1.632362  | 1.739358 | 9.344320  |
| S                                                                                | 4.841035  | 3.817771 | 9.711924  |
| S                                                                                | 8.003263  | 2.075045 | 9.494081  |
| S                                                                                | 11.122214 | 3.843207 | 9.766831  |
| C                                                                                | 1.272099  | 4.722102 | 9.464343  |
| H                                                                                | 2.373312  | 4.823536 | 9.272245  |
| H                                                                                | 0.818589  | 5.617354 | 9.020588  |
| H                                                                                | 1.168374  | 4.788167 | 10.560812 |
| H                                                                                | 1.247641  | 3.179547 | 9.743536  |
